# Supplementary material
Source: publisher figshare collection journal article supplement (https://acs.figshare.com/ndownloader/files/11406488)
Supplement: Supplementary file 1 [file 11406488]

# Supporting Information

## **Rapid Construction of Complex 2-Pyrrolines through Lewis Acid-Catalyzed, Sequential Three-Component Reactions via *in situ*-Generated 1-Azaallyl Cations**

Marcel Schlegel and Christoph Schneider

Institut für Organische Chemie, Universität Leipzig,  
Johannisallee 29, D-04103 Leipzig, Germany

\*Email: [schneider@chemie.uni-leipzig.de](mailto:schneider@chemie.uni-leipzig.de)

## Content

|     |                                                                                       |      |
|-----|---------------------------------------------------------------------------------------|------|
| 1   | General Methods.....                                                                  | S1   |
| 2   | Starting Materials .....                                                              | S2   |
| 2.1 | Procedures of Indanone-Based 2-Hydroxy Oxime Ethers <b>1</b> .....                    | S2   |
| 2.2 | Procedures of other 2-Hydroxy Oxime Ethers .....                                      | S17  |
| 2.3 | <sup>1</sup> H-NMR and <sup>13</sup> C-NMR Spectra .....                              | S22  |
| 3   | The Three-Component Reaction (3CR).....                                               | S53  |
| 3.1 | Substrate Scope of the 3CR to Tetrahydroindeno[2,1- <i>b</i> ]pyrroles <b>3</b> ..... | S54  |
| 3.2 | <sup>1</sup> H-NMR and <sup>13</sup> C-NMR Spectra .....                              | S76  |
| 3.3 | X-Ray Crystal Structure of <b>3a</b> .....                                            | S110 |
| 4   | Derivatization of Tetrahydroindeno[2,1- <i>b</i> ]pyrrole <b>3a</b> .....             | S112 |
| 4.1 | Procedures.....                                                                       | S112 |
| 4.2 | <sup>1</sup> H-NMR and <sup>13</sup> C-NMR Spectra .....                              | S117 |
| 4.3 | X-Ray Crystal Structure of <b>8</b> .....                                             | S124 |
| 5   | References.....                                                                       | S126 |

## 1 General Methods

Unless otherwise noted, all reactions were carried out in oven dried glassware and in dry solvents under an argon atmosphere.  $^1\text{H}$ -,  $^{13}\text{C}$ - and  $^{19}\text{F}$ -NMR spectra were recorded in  $\text{CDCl}_3$  or  $\text{DMSO-d}_6$  at 26 °C using a Mercury plus 300 MHz and a Bruker Avance DRX 400 MHz spectrometer. The spectra were referenced to residual  $\text{CHCl}_3$  (7.26 ppm,  $^1\text{H}$ ; 77.16 ppm,  $^{13}\text{C}$ ) or  $\text{DMSO}$  (2.50 ppm,  $^1\text{H}$ ; 39.52 ppm,  $^{13}\text{C}$ ), respectively. Chemical shifts are reported in ppm, multiplicities are indicated by s (singlet), bs (broad singlet), d (doublet), t (triplet), q (quartet), p (pentet), m (multiplet), and related permutations. Coupling constants,  $J$ , are reported in Hertz and not further specified in germinal, vicinal or long-range couplings. All high-resolution mass spectra (HRMS) were recorded on a Bruker Daltonics Apex II FT-ICR. IR spectra were obtained using a Jasco 4100 FTIR spectrometer. Melting points were determined uncorrected on a Boetius measurement device. The used solvents dichloromethane and tetrahydrofuran and toluene were dried using a MBraun Solvent Purification System (SPS) 800. Dry chloroform and methanol were purchased from Acros Organics and stored over molecular sieve. Solvents for column chromatography were of technical grade and distilled from the indicated drying reagents: dichloromethane ( $\text{CaH}_2$ ), methyl-*tert*-butyl ether (KOH), ethyl acetate ( $\text{CaCl}_2$ ) and *n*-hexane (KOH). Methanol was technical grade. Molecular Sieve (4 Å) was activated prior to use. Flash column chromatography was performed by using silica gel (Fluka, 60 Å, 230 – 400 mesh size). Analytical thin-layer chromatography (TLC) was performed on Macherey-Nagel pre-coated TLC-sheets AlugramXtra SIL G/UV<sub>254</sub>. Visualization of the spots was achieved by UV-light and treatment with a vanillin staining solution.

## 2 Starting Materials

### 2.1 Procedures of Indanone-Based 2-Hydroxy Oxime Ethers 1

#### 1,2-Indandione-2-oxime **S2a**

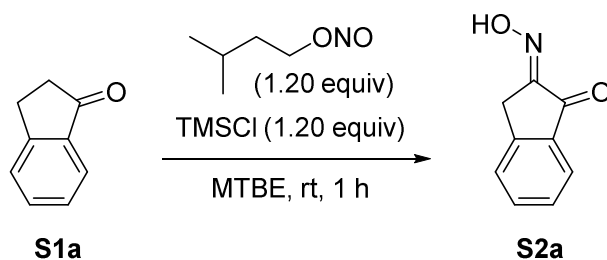

To a solution of 1-indanone **S1a** (6.61 g, 50.0 mmol, 1.00 equiv) in 50 mL MTBE, TMSCl (7.63 mL, 60.0 mmol, 1.20 equiv) was added dropwise at room temperature followed by *iso*-amyl nitrite (8.08 mL, 60.0 mmol, 1.00 eq.). Once the exothermic reaction started, it was cooled to 0 °C and then stirred at room temperature for 1 h. The resulting precipitate was filtered and washed twice with MTBE. The crude product was dried under reduced pressure. Compound **S2a** was obtained as a brown powder (6.37 g, 79%) and used without further purification for the subsequent reactions. The spectroscopic data are in agreement with literature.<sup>1</sup>

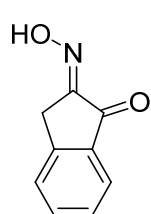

**R<sub>f</sub>**: 0.11 (1.5% MeOH/CH<sub>2</sub>Cl<sub>2</sub>); **mp.**: 195 – 196 °C; **<sup>1</sup>H-NMR** (400 MHz, DMSO-d<sub>6</sub>):  $\delta$  (ppm) = 12.63 (bs, 1H), 7.75 – 7.71 (m, 2H), 7.62 (d,  $J$  = 7.5 Hz, 1H), 7.48 (t,  $J$  = 7.5 Hz, 1H), 3.78 (s, 2H); **<sup>13</sup>C-NMR** (100 MHz, DMSO-d<sub>6</sub>):  $\delta$  (ppm) = 189.3 (C=O), 154.2 (C=N), 147.1 (C<sub>q</sub>), 137.5 (C<sub>q</sub>), 135.8 (CH), 127.8 (CH), 127.3 (CH), 123.5 (CH), 28.3 (CH<sub>2</sub>); **IR** (KBr):  $\tilde{\nu}$  (cm<sup>-1</sup>) = 3184, 3143, 2922, 1725, 1655, 1609, 1468, 1324, 1297, 903, 739; **LR-MS** (ESI<sup>+</sup>): calcd. for C<sub>9</sub>H<sub>7</sub>NO<sub>2</sub>Na ([M+Na]<sup>+</sup>): 184.0, found: 184.0; **M(C<sub>9</sub>H<sub>7</sub>NO<sub>2</sub>)**: 161.16.

#### 1,2-Indandione-2-oxime **S2b**

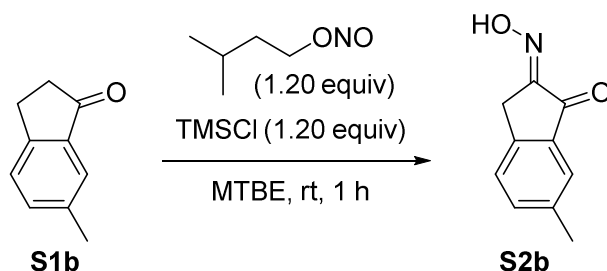

To a solution of 1-indanone **S1b** (3.65 g, 25.0 mmol, 1.00 equiv) in 25 mL MTBE, TMSCl (3.82 mL, 30.0 mmol, 1.20 equiv) was added dropwise at room temperature followed by *isoamyl*nitrite (4.04 mL, 30.0 mmol, 1.00 eq.). Once the exothermic reaction started, it was cooled to 0 °C and then stirred at room temperature for 1 h. The resulting precipitate was filtered and washed twice with MTBE. The crude product was dried under reduced pressure. Compound **S2b** was obtained as a colorless powder (3.12 g, 71%) and used without further purification for the subsequent reactions. The spectroscopic data are in agreement with literature.<sup>2</sup>

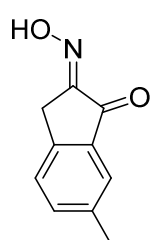

**R<sub>f</sub>**: 0.12 (1.0% MeOH/CH<sub>2</sub>Cl<sub>2</sub>); **mp.**: 201 – 202 °C; **<sup>1</sup>H-NMR** (400 MHz, DMSO-d<sub>6</sub>):  $\delta$  (ppm) = 12.60 (bs, 1H), 7.55 – 7.54 (m, 2H), 7.50 (d, *J* = 8.5 Hz, 1H), 3.70 (s, 2H), 2.37 (s, 3H); **<sup>13</sup>C-NMR** (100 MHz, DMSO-d<sub>6</sub>):  $\delta$  (ppm) = 189.2 (C=O), 154.6 (C=N), 144.4 (C<sub>q</sub>), 137.6 (C<sub>q</sub>), 137.4 (C<sub>q</sub>), 136.8 (CH), 126.9 (CH), 123.4 (CH), 27.9 (CH<sub>2</sub>), 20.6 (CH<sub>3</sub>); **IR** (KBr):  $\tilde{\nu}$  (cm<sup>-1</sup>) = 3189, 2943, 2922, 2865, 1726, 1659, 1616, 1491, 1483, 1421, 1400, 1282, 1267, 1192, 1032, 943, 857, 826, 782, 769, 751, 509; **HR-MS** (ESI<sup>+</sup>): calcd. for C<sub>10</sub>H<sub>9</sub>NO<sub>2</sub>Na ([M+Na]<sup>+</sup>): 198.0526, found: 198.0520; **M(C<sub>10</sub>H<sub>9</sub>NO<sub>2</sub>)**: 175.19.

### 1,2-Indandione-2-oxime ether **S3a**

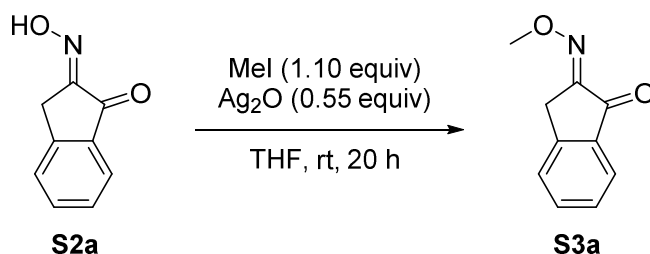

To a suspension of 1,2-indandione-2-oxime **S2a** (5.55 g, 34.4 mmol, 1.00 equiv) and Ag<sub>2</sub>O (4.39 g, 18.9 mmol, 0.55 equiv) in 90 mL abs. THF, methyl iodide (2.36 mL, 37.9 mmol, 1.10 equiv) was added dropwise at room temperature. The reaction mixture was stirred overnight and then filtered over Celite. The filter cake was washed twice with EtOAc. The solvent of the filtrate was removed under reduced pressure and the crude product was recrystallized from EtOAc/hexane. Compound **S3a** was obtained as brown crystals (4.56 g, 76%). The mother solution was concentrated under reduced pressure and purified by flash column chromatography (5% → 15% EtOAc/hexane) to isolate 0.39 g of **S3a** (overall yield: 4.95 g, 82%) as brown crystals.

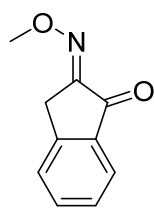

**R<sub>f</sub>**: 0.39 (20% EtOAc/hexane); **mp.**: 126 – 127 °C; **<sup>1</sup>H-NMR** (400 MHz, CDCl<sub>3</sub>):  $\delta$  (ppm) = 7.87 (d,  $J$  = 7.5 Hz, 1H), 7.64 (td,  $J$  = 7.5, 1.0 Hz, 1H), 7.49 (dt,  $J$  = 7.5 Hz, 1.0 Hz, 1H), 7.42 (t,  $J$  = 7.5 Hz, 1H), 4.16 (s, 3H), 3.77 (s, 2H); **<sup>13</sup>C-NMR** (100 MHz, CDCl<sub>3</sub>):  $\delta$  (ppm) = 189.3 (C=O), 154.9 (C=N), 146.9 (C<sub>q</sub>), 137.9 (C<sub>q</sub>), 136.1 (CH), 128.2 (CH), 126.9 (CH), 124.7 (CH), 63.9 (CH<sub>3</sub>), 28.9 (CH<sub>2</sub>); **IR** (KBr):  $\tilde{\nu}$  (cm<sup>-1</sup>) = 3070, 3051, 2984, 2941, 2833, 1719, 1627, 1609, 1596, 1577, 1467, 1456, 1434, 1327, 1302, 1267, 1206, 1194, 1151, 1035, 1017, 982, 886, 746, 675; **HR-MS** (ESI<sup>+</sup>): calcd. for C<sub>10</sub>H<sub>9</sub>NO<sub>2</sub>Na ([M+Na]<sup>+</sup>): 198.0526, found: 198.0521; **M(C<sub>10</sub>H<sub>9</sub>NO<sub>2</sub>)**: 175.19.

### 1,2-Indandione-2-oxime ether **S3b**

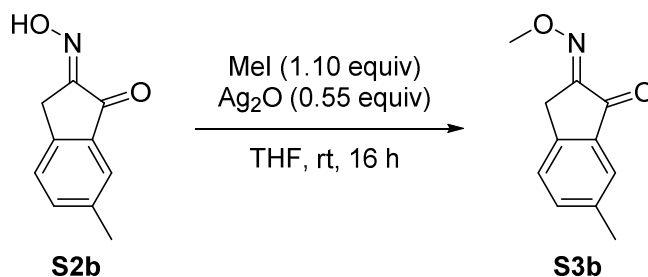

To a suspension of 6-methyl-1,2-indandione-2-oxime **S2b** (2.63 g, 15.0 mmol, 1.00 equiv) and Ag<sub>2</sub>O (1.91 g, 8.30 mmol, 0.55 equiv) in 40 mL abs. THF, methyl iodide (1.03 mL, 16.5 mmol, 1.10 equiv) was added dropwise at room temperature. The reaction mixture was stirred overnight and then filtered over Celite. The filter cake was washed twice with EtOAc. The solvent of the filtrate was removed under reduced pressure and the crude product was recrystallized from EtOAc/hexane. Compound **S3b** was obtained as colorless crystals (1.87 g, 66%).

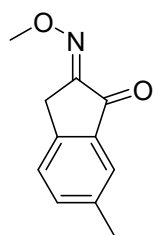

**R<sub>f</sub>**: 0.30 (20% MTBE/hexane); **mp.**: 130 – 132 °C; **<sup>1</sup>H-NMR** (400 MHz, CDCl<sub>3</sub>):  $\delta$  (ppm) = 7.68 (s, 1H), 7.46 (d,  $J$  = 8.0 Hz, 1H), 7.37 (d,  $J$  = 8.0 Hz, 1H, CH), 4.15 (s, 3H), 3.71 (s, 2H), 2.40 (s, 3H); **<sup>13</sup>C-NMR** (100 MHz, CDCl<sub>3</sub>):  $\delta$  (ppm) = 189.4 (C=O), 154.4 (C=N), 144.2 (C<sub>q</sub>), 138.2 (C<sub>q</sub>), 138.0 (C<sub>q</sub>), 137.3 (CH), 126.5 (CH), 124.7 (CH), 63.8 (CH<sub>3</sub>), 28.5 (CH<sub>2</sub>), 21.3 (CH<sub>3</sub>); **IR** (KBr):  $\tilde{\nu}$  (cm<sup>-1</sup>) = 3033, 2977, 2942, 2908, 2827, 1708, 1623, 1615, 1576, 1488, 1466, 1429, 1405, 1289, 1274, 1192, 1137, 1036, 1014, 985, 901, 863, 830, 781, 772, 745, 669, 628, 514; **HR-MS** (ESI<sup>+</sup>): calcd. for C<sub>11</sub>H<sub>11</sub>NO<sub>2</sub>Na ([M+Na]<sup>+</sup>): 212.0682, found: 212.0680; **M(C<sub>11</sub>H<sub>11</sub>NO<sub>2</sub>)**: 189.21.

### General procedure 1 for the addition of aryl-Grignards

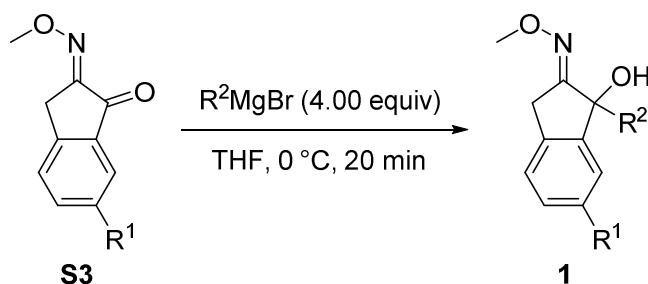

Under an inert atmosphere, magnesium turnings (4.10 equiv) were suspended in abs. THF (0.25 M). Liquid arylbromides (4.00 equiv) were added dropwise at room temperature. Solid arylbromides (4.00 equiv) were first dissolved in minimal amounts of abs. THF before added dropwise. The formation of the Grignard reagents started as soon as an exothermic reaction occurred and the colorless solution turned into grey/black. After complete addition, the reaction mixture was heated to reflux for 2 hours and then cooled to 0 °C. The starting materials **S3** (1.00 equiv.) were dissolved in abs. THF (0.2 M) and added dropwise to the Grignard reagent. The reaction mixture was stirred at 0 °C for 20 min and quenched with sat.  $\text{NH}_4\text{Cl}$ -solution. The aqueous phase was separated and extracted twice with EtOAc. The combined organic phases were dried over  $\text{Na}_2\text{SO}_4$ , filtered and the solvent was removed under reduced pressure. The crude products were purified by flash column chromatography (5% → 20% MTBE/hexane).

### 2-Hydroxy oxime ether **1a**

According to the general procedure 1, the Grignard reagent was synthesized from magnesium turnings (825 mg, 33.9 mmol, 4.10 equiv) and bromobenzene (3.49 mL, 33.1 mmol, 4.00 equiv) in 35 mL abs. THF, and then treated with 1,2-indandione-2-oxime ether **S3a** (1.45 g, 8.28 mmol, 1.00 equiv) dissolved in 30 mL abs. THF. Compound **1a** was obtained as a colorless solid (1.82 g, 87%).

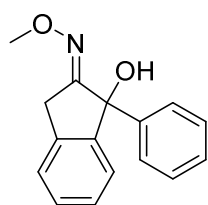

**R<sub>f</sub>**: 0.56 (30% MTBE/hexane); **mp.**: 123 – 125 °C; **<sup>1</sup>H-NMR** (400 MHz,  $\text{CDCl}_3$ ):  $\delta$  (ppm) = 7.38 – 7.22 (m, 9H), 4.03 (d,  $J$  = 22.0 Hz, 1H), 3.92 (s, 3H), 3.74 (d,  $J$  = 22.0 Hz, 1H), 2.95 (bs, 1H); **<sup>13</sup>C-NMR** (100 MHz,  $\text{CDCl}_3$ ):  $\delta$  (ppm) = 166.1 (C=N), 145.9 ( $\text{C}_q$ ), 144.7 ( $\text{C}_q$ ), 137.4 ( $\text{C}_q$ ), 129.4 (CH), 128.3 (2x CH), 128.2 (CH), 127.5 (CH), 125.7 (2x CH), 125.2 (CH), 124.9 (CH), 82.9 ( $\text{C}_q$ ), 62.4 ( $\text{CH}_3$ ), 32.5 ( $\text{CH}_2$ ); **IR** (KBr):  $\tilde{\nu}$  ( $\text{cm}^{-1}$ ) = 3429, 3055, 2965, 2924, 2815, 1652, 1635, 1491, 1457, 1448, 1361, 1171, 1059, 1048, 862, 760, 738, 700, 646; **HR-MS** (ESI<sup>+</sup>): calcd. for  $\text{C}_{16}\text{H}_{15}\text{NO}_2\text{Na}$  ( $[\text{M}+\text{Na}]^+$ ): 276.0995, found: 276.0990; **M**( $\text{C}_{16}\text{H}_{15}\text{NO}_2$ ): 253.30.

## 2-Hydroxy oxime ether 1b

According to the general procedure 1, the Grignard reagent was synthesized from magnesium turnings (498 mg, 20.5 mmol, 4.10 equiv) and bromobenzene (2.11.0 mL, 20.0 mmol, 4.00 equiv) in 20 mL abs. THF, and then treated with 6-methyl-1,2-indandione-2-oxime ether **S3b** (946 mg, 5.00 mmol, 1.00 equiv) dissolved in 25 mL abs. THF. Compound **1b** was obtained as a colorless solid (1.20 g, 90%).

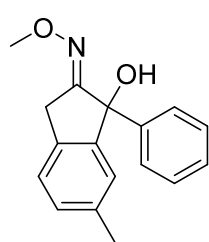

**R<sub>f</sub>**: 0.26 (20% MTBE/hexane); **mp.**: 73 – 75 °C; **<sup>1</sup>H-NMR** (300 MHz, CDCl<sub>3</sub>): δ (ppm) = 7.40 – 7.22 (m, 6H), 7.16 – 7.13 (m, 1H), 7.08 (m, 1H), 3.99 (d, *J* = 22.0 Hz, 1H), 3.90 (s, 3H), 3.71 (d, *J* = 22.0 Hz, 1H), 3.03 (bs, 1H), 2.31 (s, 3H); **<sup>13</sup>C-NMR** (75 MHz, CDCl<sub>3</sub>): δ (ppm) = 166.6 (C=N), 145.9 (C<sub>q</sub>), 144.9 (C<sub>q</sub>), 138.0 (C<sub>q</sub>), 134.4 (C<sub>q</sub>), 130.4 (CH), 128.3 (2x CH), 127.4 (CH), 125.6 (2x CH), 125.2 (CH), 124.9 (CH), 82.9 (C<sub>q</sub>), 62.3 (CH<sub>3</sub>), 32.2 (CH<sub>2</sub>), 21.5 (CH<sub>3</sub>); **IR** (KBr):  $\tilde{\nu}$  (cm<sup>-1</sup>) = 3464, 3084, 3061, 3023, 3002, 2940, 2899, 2857, 2818, 1749, 1660, 1601, 1492, 1447, 1413, 1360, 1315, 1277, 1186, 1174, 1155, 1142, 1110, 1029, 983, 921, 910, 887, 874, 850, 814, 767, 736, 724, 694, 672, 650, 614, 562, 490, 457, 426; **HR-MS** (ESI<sup>+</sup>): calcd. for C<sub>17</sub>H<sub>17</sub>NO<sub>2</sub>Na ([M+Na]<sup>+</sup>): 290.1152, found: 290.1150; **M(C<sub>17</sub>H<sub>17</sub>NO<sub>2</sub>)**: 267.33.

## 2-Hydroxy oxime ether 1c

According to the general procedure 1, the Grignard reagent was synthesized from magnesium turnings (498 mg, 20.5 mmol, 4.10 equiv) and 2-bromotoluene (2.41.0 mL, 20.0 mmol, 4.00 equiv) in 20 mL abs. THF, and then treated with 1,2-indandione-2-oxime ether **S3a** (876 mg, 5.00 mmol, 1.00 equiv) dissolved in 25 mL abs. THF. Compound **1c** was obtained as a colorless solid (1.20 g, 90%).

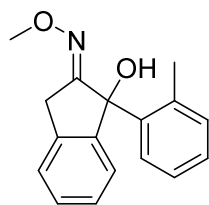

**R<sub>f</sub>**: 0.45 (30% MTBE/hexane); **mp.**: 105 – 106 °C; **<sup>1</sup>H-NMR** (400 MHz, CDCl<sub>3</sub>): δ (ppm) = 8.07 (dd, *J* = 8.0, 1.5 Hz, 1H), 7.37 – 7.31 (m, 3H), 7.25 – 7.19 (m, 2H), 7.06 (d, *J* = 7.5 Hz, 1H), 6.99 (dd, *J* = 7.5, 1.0 Hz, 1H), 4.03 (d, *J* = 22.0 Hz, 1H), 3.93 (d, *J* = 22.0 Hz, 1H), 3.87 (s, 3H), 2.59 – 2.56 (m, 1H), 1.73 (s, 3H); **<sup>13</sup>C-NMR** (75 MHz, CDCl<sub>3</sub>): δ (ppm) = 165.7 (C=N), 145.0 (C<sub>q</sub>), 141.7 (C<sub>q</sub>), 138.3 (C<sub>q</sub>), 135.2 (C<sub>q</sub>), 131.6 (CH), 129.5 (CH), 128.1 (CH), 127.9 (CH), 125.7 (CH), 125.6 (CH), 125.2 (CH), 124.5 (CH), 82.6 (C<sub>q</sub>), 62.4 (CH<sub>3</sub>), 32.7 (CH<sub>2</sub>), 20.6 (CH<sub>3</sub>); **IR** (KBr):  $\tilde{\nu}$  (cm<sup>-1</sup>) = 3434, 3066, 3029, 2938, 2899, 1653, 1605, 1485, 1478, 1459, 1413, 1176, 1163, 1022, 917, 871, 853, 773, 761, 742, 727, 642; **HR-MS** (ESI<sup>+</sup>): calcd. for C<sub>17</sub>H<sub>17</sub>NO<sub>2</sub>Na ([M+Na]<sup>+</sup>): 290.1152, found: 290.1148; **M(C<sub>17</sub>H<sub>17</sub>NO<sub>2</sub>)**: 267.33.



## 2-Hydroxy oxime ether 1d

According to the general procedure 1, the Grignard reagent was synthesized from magnesium turnings (498 mg, 20.5 mmol, 4.10 equiv) and 3-bromotoluene (2.43 mL, 20.0 mmol, 4.00 equiv) in 20 mL abs. THF, and then treated with 1,2-indandione-2-oxime ether **S3a** (876 mg, 5.00 mmol, 1.00 equiv) dissolved in 25 mL abs. THF. Compound **1d** was obtained as a colorless solid (1.29 g, 96%).

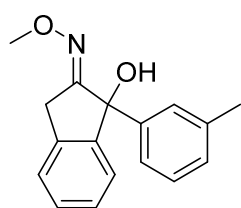

**R<sub>f</sub>**: 0.32 (20% MTBE/hexane); **mp.**: 60 – 62 °C; **<sup>1</sup>H-NMR** (400 MHz, CDCl<sub>3</sub>): δ (ppm) = 7.33 – 7.29 (m, 2H), 7.27 – 7.24 (m, 2H), 7.20 (m, 1H), 7.15 (d, *J* = 7.5 Hz, 1H), 7.09 (m, 1H), 7.03 (m, 1H), 4.00 (d, *J* = 22.0 Hz, 1H), 3.89 (s, 3H), 3.72 (d, *J* = 22.0 Hz, 1H), 2.96 (bs, 1H), 2.30 (s, 3H); **<sup>13</sup>C-NMR** (100 MHz, CDCl<sub>3</sub>): δ (ppm) = 166.2 (C=N), 146.0 (C<sub>q</sub>), 144.6 (C<sub>q</sub>), 138.0 (C<sub>q</sub>), 137.4 (C<sub>q</sub>), 129.4 (CH), 128.3 (CH), 128.2 (CH), 128.1 (CH), 126.2 (CH), 125.2 (CH), 124.9 (CH), 122.8 (CH), 82.9 (C<sub>q</sub>), 62.4 (CH<sub>3</sub>), 32.6 (CH<sub>2</sub>), 21.7 (CH<sub>3</sub>); **IR** (KBr):  $\tilde{\nu}$  (cm<sup>-1</sup>) = 3420, 3030, 2964, 2923, 2886, 2815, 1653, 1605, 1587, 1480, 1457, 1441, 1427, 1352, 1237, 1156, 1147, 1062, 1047, 862, 781, 761, 739, 722, 700; **HR-MS** (ESI<sup>+</sup>): calcd. for C<sub>17</sub>H<sub>17</sub>NO<sub>2</sub>Na ([M+Na]<sup>+</sup>): 290.1152, found: 290.1147; **M(C<sub>17</sub>H<sub>17</sub>NO<sub>2</sub>)**: 267.33.

## 2-Hydroxy oxime ether 1e

According to the general procedure 1, the Grignard reagent was synthesized from magnesium turnings (498 mg, 20.5 mmol, 4.10 equiv) and 4-bromotoluene (3.42 g, 20.0 mmol, 4.00 equiv) in 20 mL abs. THF, and then treated with 1,2-indandione-2-oxime ether **S3a** (876 mg, 5.00 mmol, 1.00 equiv) dissolved in 25 mL abs. THF. Compound **1e** was obtained as a colorless solid (1.08 g, 81%).

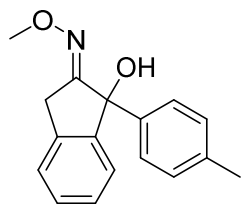

**R<sub>f</sub>**: 0.19 (MTBE/hexane); **mp.**: 86 – 88 °C; **<sup>1</sup>H-NMR** (400 MHz, CDCl<sub>3</sub>): δ (ppm) = 7.34 – 7.24 (m, 6H), 7.12 (d', *J* = 8.0 Hz, 2H), 4.02 (d, *J* = 22.0 Hz, 1H), 3.91 (s, 3H), 3.73 (d, *J* = 22.0 Hz, 1H), 2.90 (bs, 1H), 2.32 (s, 3H); **<sup>13</sup>C-NMR** (100 MHz, CDCl<sub>3</sub>): δ (ppm) = 166.2 (C=N), 146.0 (C<sub>q</sub>), 141.8 (C<sub>q</sub>), 137.4 (C<sub>q</sub>), 137.2 (C<sub>q</sub>), 129.3 (CH), 129.0 (2x CH), 128.1 (CH), 125.6 (2x CH), 125.2 (CH), 124.9 (CH), 82.8 (C<sub>q</sub>), 62.4 (CH<sub>3</sub>), 32.5 (CH<sub>2</sub>), 21.2 (CH<sub>3</sub>); **IR** (KBr):  $\tilde{\nu}$  (cm<sup>-1</sup>) = 3443, 3071, 3027, 2983, 2944, 2919, 2904, 2890, 2823, 1654, 1606, 1513, 1478, 1459, 1432, 1414, 1382, 1214, 1196, 1179, 1166, 1057, 1039, 1024, 914, 853, 838, 811, 766, 742, 726, 653, 622, 584, 537, 510, 485, 453; **HR-MS** (ESI<sup>+</sup>): calcd. for C<sub>17</sub>H<sub>17</sub>NO<sub>2</sub>Na ([M+Na]<sup>+</sup>): 290.1152, found: 290.1148. **M(C<sub>17</sub>H<sub>17</sub>NO<sub>2</sub>)**: 267.33.

## 2-Hydroxy oxime ether 1f

According to the general procedure 1, the Grignard reagent was synthesized from magnesium turnings (498 mg, 20.5 mmol, 4.10 equiv) and 1-bromo-4-(*tert*-butyl)benzene (3.47 mL, 20.0 mmol, 4.00 equiv) in 20 mL abs. THF, and then treated with 1,2-indandione-2-oxime ether **S3a** (876 mg, 5.00 mmol, 1.00 equiv) dissolved in 25 mL abs. THF. Compound **1f** was obtained as a colorless solid (1.08 g, 70%).

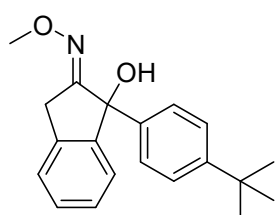

**R<sub>f</sub>**: 0.36 (20% MTBE/hexane); **mp.**: 125 – 127 °C; **<sup>1</sup>H-NMR** (300 MHz, CDCl<sub>3</sub>):  $\delta$  (ppm) = 7.36 – 7.26 (m, 8H), 4.03 (d,  $J$  = 22.0 Hz, 1H), 3.92 (s, 3H), 3.72 (d,  $J$  = 22.0 Hz, 1H), 3.17 (bs, 1H), 1.31 (s, 9H); **<sup>13</sup>C-NMR** (75 MHz, CDCl<sub>3</sub>):  $\delta$  (ppm) = 166.2 (C=N), 150.3 (C<sub>q</sub>), 145.9 (C<sub>q</sub>), 141.7 (C<sub>q</sub>), 137.3 (C<sub>q</sub>), 129.3 (CH), 128.0 (CH), 125.2 (2x CH), 125.1 (2x CH), 125.0 (CH), 124.8 (CH), 82.8 (C<sub>q</sub>), 62.3 (CH<sub>3</sub>), 34.6 (C<sub>q</sub>), 32.5 (CH<sub>2</sub>), 31.4 (3x CH<sub>3</sub>); **IR** (KBr):  $\tilde{\nu}$  (cm<sup>-1</sup>) = 3416, 3036, 2963, 2904, 2865, 1654, 1607, 1509, 1476, 1459, 1409, 1360, 1267, 1180, 1052, 1030, 916, 859, 827, 765, 728, 654, 559; **HR-MS** (ESI<sup>+</sup>): calcd. for C<sub>20</sub>H<sub>23</sub>NO<sub>2</sub>Na ([M+Na]<sup>+</sup>): 332.1621, found: 332.1622; **M(C<sub>20</sub>H<sub>23</sub>NO<sub>2</sub>)**: 309.41.

## 2-Hydroxy oxime ether 1g

According to the general procedure 1, the Grignard reagent was synthesized from magnesium turnings (498 mg, 20.5 mmol, 4.10 equiv) and 1-bromo-4-phenylbenzene (4.66 g, 20.0 mmol, 4.00 equiv) in 20 mL abs. THF, and then treated with 1,2-indandione-2-oxime ether **S3a** (876 mg, 5.00 mmol, 1.00 equiv) dissolved in 25 mL abs. THF. Compound **1g** was obtained as a colorless solid (1.37 g, 83%).

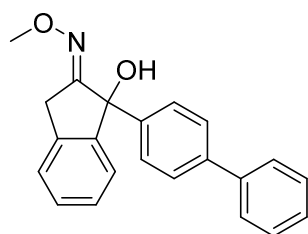

**R<sub>f</sub>**: 0.26 (20% MTBE/hexane), **mp.**: 119 – 121 °C; **<sup>1</sup>H-NMR** (400 MHz, CDCl<sub>3</sub>):  $\delta$  (ppm) = 7.59 – 7.54 (m, 4H), 7.46 – 7.41 (m, 4H), 7.37 – 7.31 (m, 5H), 4.06 (d,  $J$  = 22.0 Hz, 1H), 3.94 (s, 3H), 3.79 (d,  $J$  = 22.0 Hz, 1H), 3.11 (bs, 1H); **<sup>13</sup>C-NMR** (100 MHz, CDCl<sub>3</sub>):  $\delta$  (ppm) = 166.1 (C=N), 145.8 (C<sub>q</sub>), 143.7 (C<sub>q</sub>), 140.9 (C<sub>q</sub>), 140.4 (C<sub>q</sub>), 137.4 (C<sub>q</sub>), 129.5 (CH), 128.9 (2x CH), 128.2 (CH), 127.4 (CH), 127.2 (2x CH), 127.1 (2x CH), 126.1 (2x CH), 125.3 (CH), 125.0 (CH), 82.8 (C<sub>q</sub>), 62.4 (CH<sub>3</sub>), 32.6 (CH<sub>2</sub>); **IR** (KBr):  $\tilde{\nu}$  (cm<sup>-1</sup>) = 3434, 3028, 2938, 2898, 1599, 1486, 1460, 1412, 1182, 1041, 1019, 1007, 918, 866, 855, 834, 769, 756, 739, 726, 698; **HR-MS** (ESI<sup>+</sup>): calcd. for C<sub>22</sub>H<sub>19</sub>NO<sub>2</sub>Na ([M+Na]<sup>+</sup>): 352.1308, found: 352.1307; **M(C<sub>22</sub>H<sub>19</sub>NO<sub>2</sub>)**: 329.40.

## 2-Hydroxy oxime ether 1h

According to the general procedure 1, the Grignard reagent was synthesized from magnesium turnings (498 mg, 20.5 mmol, 4.10 equiv) and 1-bromo-3-methoxybenzene (2.53 mL, 20.0 mmol, 4.00 equiv) in 20 mL abs. THF, and then treated with 1,2-indandione-2-oxime ether **S3a** (876 mg, 5.00 mmol, 1.00 equiv) dissolved in 25 mL abs. THF. Compound **1h** was obtained as a colorless solid (1.35 g, 95%).

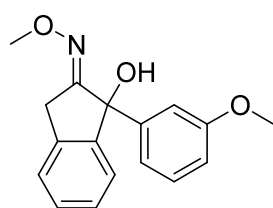

**R<sub>f</sub>**: 0.34 (30% MTBE/hexane); **mp.**: 100 – 102 °C; **<sup>1</sup>H-NMR** (300 MHz, CDCl<sub>3</sub>):  $\delta$  (ppm) = 7.34 – 7.26 (m, 4H), 7.21 (t,  $J$  = 8.0 Hz, 1H), 7.03 – 7.02 (m, 1H), 6.88 – 6.84 (m, 1H), 6.80 – 6.77 (m, 1H), 4.01 (d,  $J$  = 22.0 Hz, 1H), 3.91 (s, 3H), 3.78 (s, 3H), 3.74 (d,  $J$  = 22.0 Hz, 1H), 3.16 – 3.15 (m, 1H); **<sup>13</sup>C-NMR** (75 MHz, CDCl<sub>3</sub>):  $\delta$  (ppm) = 166.0 (C=N), 159.6 (C<sub>q</sub>), 146.4 (C<sub>q</sub>), 145.8 (C<sub>q</sub>), 137.4 (C<sub>q</sub>), 129.4 (CH), 129.3 (CH), 128.1 (CH), 125.2 (CH), 124.9 (CH), 118.2 (CH), 112.7 (CH), 111.7 (CH), 82.8 (C<sub>q</sub>), 62.4 (CH<sub>3</sub>), 55.4 (CH<sub>3</sub>), 32.5 (CH<sub>2</sub>); **IR** (KBr):  $\tilde{\nu}$  (cm<sup>-1</sup>) = 3442, 2993, 2972, 2936, 2901, 2837, 2822, 1650, 1605, 1585, 1483, 1459, 1438, 1403, 1369, 1286, 1251, 1167, 1155, 1136, 1052, 1043, 1027, 950, 894, 852, 808, 780, 768, 742, 727, 699, 613, 585; **HR-MS** (ESI<sup>+</sup>): calc. for C<sub>17</sub>H<sub>17</sub>NO<sub>3</sub>Na ([M+Na]<sup>+</sup>): 306.1101, found: 306.1096; **M(C<sub>17</sub>H<sub>17</sub>NO<sub>3</sub>)**: 283.33.

## 2-Hydroxy oxime ether 1i

According to the general procedure 1, the Grignard reagent was synthesized from magnesium turnings (498 mg, 20.5 mmol, 4.10 equiv) and 1-bromo-4-methoxybenzene (2.50 mL, 20.0 mmol, 4.00 equiv) in 20 mL abs. THF, and then treated with 1,2-indandione-2-oxime ether **S3a** (876 mg, 5.00 mmol, 1.00 equiv) dissolved in 25 mL abs. THF. Compound **1i** was obtained as a colorless solid (1.30 g, 91%).

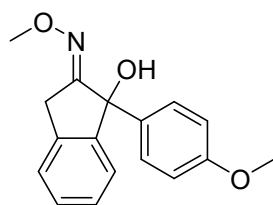

**R<sub>f</sub>**: 0.42 (40% MTBE/hexane); **mp.**: 99 – 101 °C; **<sup>1</sup>H-NMR** (300 MHz, CDCl<sub>3</sub>):  $\delta$  (ppm) = 7.31 – 7.26 (m, 6H), 6.83 (d',  $J$  = 9.0 Hz, 2H), 4.00 (d,  $J$  = 22.0 Hz, 1H), 3.91 (s, 3H), 3.77 (s, 3H), 3.71 (d,  $J$  = 22.0 Hz, 1H), 3.04 (bs, 1H); **<sup>13</sup>C-NMR** (75 MHz, CDCl<sub>3</sub>):  $\delta$  (ppm) = 166.2 (C=N), 159.0 (C<sub>q</sub>), 146.0 (C<sub>q</sub>), 137.3 (C<sub>q</sub>), 136.9 (C<sub>q</sub>), 129.3 (CH), 128.1 (CH), 127.0 (2x CH), 125.2 (CH), 124.9 (CH), 113.7 (2x CH), 82.6 (C<sub>q</sub>), 62.3 (CH<sub>3</sub>), 55.4 (CH<sub>3</sub>), 32.4 (CH<sub>2</sub>); **IR** (KBr):  $\tilde{\nu}$  (cm<sup>-1</sup>) = 3442, 3068, 3011, 2948, 2839, 1608, 1582, 1509, 1477, 1461, 1419, 1295, 1252, 1175, 1059, 1034, 1024, 914, 852, 835, 807, 771, 745, 654, 591; **HR-MS** (ESI<sup>+</sup>): calcd. for C<sub>17</sub>H<sub>17</sub>NO<sub>3</sub>Na ([M+Na]<sup>+</sup>): 306.1101, found: 306.1098; **M(C<sub>17</sub>H<sub>17</sub>NO<sub>3</sub>)**: 283.33.

## 2-Hydroxy oxime ether 1j

According to the general procedure 1, the Grignard reagent was synthesized from magnesium turnings (498 mg, 20.5 mmol, 4.10 equiv) and 1-bromo-3,4-(methylenedioxy)benzene (2.42 mL, 20.0 mmol, 4.00 equiv) in 20 mL abs. THF, and then treated with 1,2-indandione-2-oxime ether **S3a** (876 mg, 5.00 mmol, 1.00 equiv) dissolved in 25 mL abs. THF. Compound **1j** was obtained as a colorless solid (1.42 g, 95%).

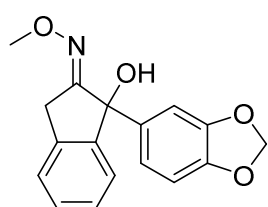

**R<sub>f</sub>**: 0.35 (30% MTBE/hexane); **mp.**: 115 – 117 °C; **<sup>1</sup>H-NMR** (300 MHz, CDCl<sub>3</sub>):  $\delta$  (ppm) = 7.34 – 7.28 (m, 4H), 6.91 (d,  $J$  = 2.0 Hz, 1H), 6.79 (dd,  $J$  = 8.0, 2.0 Hz, 1H), 6.72 (dd,  $J$  = 8.0 Hz, 1H), 5.93 (d,  $J$  = 1.5 Hz, 1H), 5.92 (d,  $J$  = 1.5 Hz, 1H), 4.00 (d,  $J$  = 22.0 Hz, 1H), 3.92 (s, 3H), 3.71 (d,  $J$  = 22.0 Hz, 1H), 2.99 (bs, 1H); **<sup>13</sup>C-NMR** (75 MHz, CDCl<sub>3</sub>):  $\delta$  (ppm) = 166.0 (C=N), 147.8 (C<sub>q</sub>), 147.0 (C<sub>q</sub>), 145.8 (C<sub>q</sub>), 138.8 (C<sub>q</sub>), 137.3 (C<sub>q</sub>), 129.4 (CH), 128.1 (CH), 125.2 (CH), 124.8 (CH), 119.1 (CH), 107.9 (CH), 106.8 (CH), 101.2 (CH<sub>2</sub>), 82.7 (C<sub>q</sub>), 62.4 (CH<sub>3</sub>), 32.4 (CH<sub>2</sub>); **IR** (KBr):  $\tilde{\nu}$  (cm<sup>-1</sup>) = 3406, 3010, 2946, 2884, 1654, 1614, 1504, 1489, 1436, 1410, 1241, 1063, 1039, 1027, 933, 857, 844, 821, 811, 770, 745, 658; **HR-MS** (ESI<sup>+</sup>): calcd. for C<sub>17</sub>H<sub>15</sub>NO<sub>4</sub>Na ([M+Na]<sup>+</sup>): 320.0893, found: 320.0888; **M**(C<sub>17</sub>H<sub>15</sub>NO<sub>4</sub>): 297.31.

## 2-Hydroxy oxime ether 1k

According to the general procedure 1, the Grignard reagent was synthesized from magnesium turnings (498 mg, 20.5 mmol, 4.10 equiv) and 4-bromo-*N,N*-dimethylaniline (4.00 g, 20.0 mmol, 4.00 equiv) in 20 mL abs. THF, and then treated with 1,2-indandione-2-oxime ether **S3a** (876 mg, 5.00 mmol, 1.00 equiv) dissolved in 25 mL abs. THF. Compound **1k** was obtained as a green solid (1.25 g, 85%).

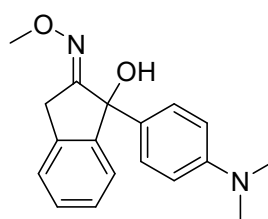

**R<sub>f</sub>**: 0.30 (40% MTBE/hexane); **mp.**: 99 – 101 °C; **<sup>1</sup>H-NMR** (400 MHz, CDCl<sub>3</sub>):  $\delta$  (ppm) = 7.36 – 7.23 (m, 6H), 6.67 (d',  $J$  = 8.5 Hz, 2H), 3.99 (d,  $J$  = 22.0 Hz, 1H), 3.93 (s, 3H), 3.68 (d,  $J$  = 22.0 Hz, 1H), 3.12 (bs, 1H), 2.92 (s, 6H); **<sup>13</sup>C-NMR** (100 MHz, CDCl<sub>3</sub>):  $\delta$  (ppm) = 166.3 (C=N), 149.9 (C<sub>q</sub>), 146.1 (C<sub>q</sub>), 137.3 (C<sub>q</sub>), 132.4 (C<sub>q</sub>), 129.1 (CH), 127.9 (CH), 126.6 (2x CH), 125.1 (CH), 124.9 (CH), 112.3 (2x CH), 82.7 (C<sub>q</sub>), 62.2 (CH<sub>3</sub>), 40.6 (2x CH<sub>3</sub>), 32.3 (CH<sub>2</sub>); **IR** (KBr):  $\tilde{\nu}$  (cm<sup>-1</sup>) = 3463, 3069, 3001, 2984, 2941, 2894, 2803, 1613, 1590, 1522, 1479, 1459, 1444, 1375, 1351, 1213, 1182, 1167, 1128, 1051, 1023, 914, 850, 813, 769, 740, 651; **HR-MS** (ESI<sup>+</sup>): calcd. for C<sub>18</sub>H<sub>20</sub>N<sub>2</sub>O<sub>2</sub>Na ([M+Na]<sup>+</sup>): 319.1417, found: 319.1419; **M**(C<sub>18</sub>H<sub>20</sub>N<sub>2</sub>O<sub>2</sub>): 296.37.

## 2-Hydroxy oxime ether 1l

According to the [general procedure 1](#), the Grignard reagent was synthesized from magnesium turnings (498 mg, 20.5 mmol, 4.10 equiv) and 2-bromonaphthalene (4.14 g, 20.0 mmol, 4.00 equiv) in 20 mL abs. THF, and then treated with 1,2-indandione-2-oxime ether **S3a** (876 mg, 5.00 mmol, 1.00 equiv) dissolved in 25 mL abs. THF. Compound **1l** was obtained as a colorless solid (1.36 g, 90%).

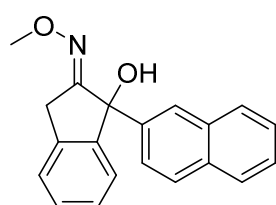

**R<sub>f</sub>**: 0.27 (20% MTBE/hexane); **mp.**: 108 – 110 °C; **<sup>1</sup>H-NMR** (300 MHz, CDCl<sub>3</sub>):  $\delta$  (ppm) = 7.96 (m, 1H), 7.85 – 7.76 (m, 3H), 7.51 – 7.45 (m, 2H), 7.40 – 7.28 (m, 5H), 4.08 (d,  $J$  = 22.0 Hz, 1H), 3.91 (s, 3H), 3.85 (d,  $J$  = 22.0 Hz, 1H), 3.35 – 3.32 (m, 1H); **<sup>13</sup>C-NMR** (75 MHz, CDCl<sub>3</sub>):  $\delta$  (ppm) = 166.1 (C=N), 145.8 (C<sub>q</sub>), 142.0 (C<sub>q</sub>), 137.5 (C<sub>q</sub>), 133.1 (C<sub>q</sub>), 132.7 (C<sub>q</sub>), 129.5 (CH), 128.5 (CH), 128.2 (CH), 128.1 (CH), 127.6 (CH), 126.2 (CH), 126.1 (CH), 125.2 (CH), 125.1 (CH), 124.3 (CH), 123.9 (CH), 83.0 (C<sub>q</sub>), 62.4 (CH<sub>3</sub>), 32.6 (CH<sub>2</sub>); **IR** (KBr):  $\tilde{\nu}$  (cm<sup>-1</sup>) = 3455, 3045, 3024, 2977, 2940, 2899, 2820, 1654, 1634, 1600, 1508, 1479, 1460, 1433, 1411, 1375, 1249, 1166, 1123, 1048, 959, 924, 899, 863, 854, 835, 812, 765, 750, 739, 726, 669, 625, 570, 492, 475, 434; **HR-MS** (ESI<sup>+</sup>): calcd. for C<sub>20</sub>H<sub>17</sub>NO<sub>2</sub>Na ([M+Na]<sup>+</sup>): 326.1152, found: 326.1150; **M(C<sub>20</sub>H<sub>17</sub>NO<sub>2</sub>)**: 303.36.

## 2-Hydroxy oxime ether 1m

According to the [general procedure 1](#), the Grignard reagent was synthesized from magnesium turnings (498 mg, 20.5 mmol, 4.10 equiv) and 2-bromothiophene (1.92 mL, 20.0 mmol, 4.00 equiv) in 20 mL abs. THF, and then treated with 1,2-indandione-2-oxime ether **S3a** (876 mg, 5.00 mmol, 1.00 equiv) dissolved in 25 mL abs. THF. Compound **1m** was obtained as a colorless solid (1.26 g, 97%).

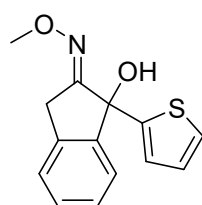

**R<sub>f</sub>**: 0.45 (30% MTBE/hexane); **mp.**: 114 – 116 °C; **<sup>1</sup>H-NMR** (300 MHz, CDCl<sub>3</sub>):  $\delta$  (ppm) = 7.55 – 7.51 (m, 1H), 7.36 – 7.31 (m, 3H), 7.26 (dd,  $J$  = 5.0, 1.5 Hz, 1H), 6.90 (dd,  $J$  = 5.0, 3.5 Hz, 1H), 6.81 (dd,  $J$  = 3.5, 1.5 Hz, 1H), 3.99 (d,  $J$  = 22.0 Hz, 1H), 3.97 (s, 3H), 3.71 (d,  $J$  = 22.0 Hz, 1H), 3.25 (bs, 1H); **<sup>13</sup>C-NMR** (100 MHz, CDCl<sub>3</sub>):  $\delta$  (ppm) = 164.7 (C=N), 148.9 (C<sub>q</sub>), 145.0 (C<sub>q</sub>), 137.0 (C<sub>q</sub>), 129.7 (CH), 128.0 (CH), 126.7 (CH), 125.9 (CH), 125.2 (CH), 125.0 (CH), 124.7 (CH), 80.9 (C<sub>q</sub>), 62.5 (CH<sub>3</sub>), 31.9 (CH<sub>2</sub>); **IR** (KBr):  $\tilde{\nu}$  (cm<sup>-1</sup>) = 3424, 3108, 3042, 2973, 2934, 2898, 2819, 1654, 1436, 1479, 1459, 1436, 1398, 1374, 1235, 1168, 1153, 1133, 1039, 1025, 858, 845, 829, 772, 748, 707, 651; **HR-MS** (ESI<sup>+</sup>): calcd. for C<sub>14</sub>H<sub>13</sub>NO<sub>2</sub>SNa ([M+Na]<sup>+</sup>): 282.0559, found: 282.0555; **M(C<sub>14</sub>H<sub>13</sub>NO<sub>2</sub>S)**: 259.32.

## 2-Hydroxy oxime ether 1n

According to the general procedure 1, the Grignard reagent was synthesized from magnesium turnings (498 mg, 20.5 mmol, 4.10 equiv) and 1-bromo-4-chlorobenzene (3.83 g, 20.0 mmol, 4.00 equiv) in 20 mL abs. THF, and then treated with 1,2-indandione-2-oxime ether **S3a** (876 mg, 5.00 mmol, 1.00 equiv) dissolved in 25 mL abs. THF. Compound **1n** was obtained as a colorless solid (1.35 g, 94%).

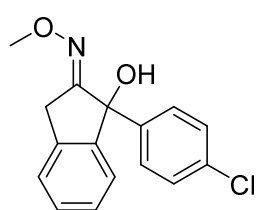

**R<sub>f</sub>**: 0.24 (20% MTBE/hexane); **mp.**: 108 – 110 °C; **<sup>1</sup>H-NMR** (300 MHz, CDCl<sub>3</sub>):  $\delta$  (ppm) = 7.36 – 7.21 (m, 8H), 4.01 (d,  $J$  = 22.0 Hz, 1H), 3.90 (s, 3H), 3.74 (d,  $J$  = 22.0 Hz, 1H), 3.10 (bs, 1H); **<sup>13</sup>C-NMR** (75 MHz, CDCl<sub>3</sub>):  $\delta$  (ppm) = 165.8 (C=N), 145.5 (C<sub>q</sub>), 143.2 (C<sub>q</sub>), 137.4 (C<sub>q</sub>), 133.4 (C<sub>q</sub>), 129.7 (CH), 128.4 (2x CH), 128.3 (CH), 127.2 (2x CH), 125.3 (CH), 124.8 (CH), 82.5 (C<sub>q</sub>), 62.4 (CH<sub>3</sub>), 32.5 (CH<sub>2</sub>); **IR** (KBr):  $\tilde{\nu}$  (cm<sup>-1</sup>) = 3421, 3006, 2984, 2941, 2902, 2822, 1654, 1605, 1597, 1490, 1479, 1459, 1410, 1193, 1175, 1088, 1051, 1024, 915, 856, 831, 820, 766, 752, 727, 720, 647, 611, 507, 482, 444; **HR-MS** (ESI<sup>+</sup>): calcd. for C<sub>16</sub>H<sub>14</sub><sup>35</sup>ClNO<sub>2</sub>Na ([M+Na]<sup>+</sup>): 310.0605, found: 310.0607; **M(C<sub>16</sub>H<sub>14</sub>ClNO<sub>2</sub>)**: 287.74.

## 2-Hydroxy oxime ether 1o

According to the general procedure 1, the Grignard reagent was synthesized from magnesium turnings (498 mg, 20.5 mmol, 4.10 equiv) and 1-bromo-4-fluorobenzene (2.18 mL, 20.0 mmol, 4.00 equiv) in 20 mL abs. THF, and then treated with 1,2-indandione-2-oxime ether **S3a** (876 mg, 5.00 mmol, 1.00 equiv) dissolved in 25 mL abs. THF. Compound **1o** was obtained as a colorless solid (1.30 g, 96%).

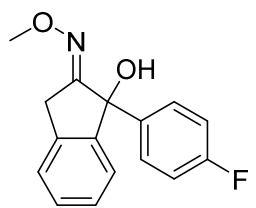

**R<sub>f</sub>**: 0.26 (20% MTBE/hexane); **mp.**: 99 – 101 °C; **<sup>1</sup>H-NMR** (300 MHz, CDCl<sub>3</sub>):  $\delta$  (ppm) = 7.37 – 7.24 (m, 6H, 6x CH), 7.02 – 6.94 (m, 2H), 4.01 (d,  $J$  = 22.0 Hz, 1H), 3.91 (s, 3H), 3.73 (d,  $J$  = 22.0 Hz, 1H), 3.01 (bs, 1H); **<sup>13</sup>C-NMR** (75 MHz, CDCl<sub>3</sub>):  $\delta$  (ppm) = 165.9 (C=N), 162.2 (d,  $J$  = 246.0 Hz, C<sub>q</sub>), 145.7 (C<sub>q</sub>), 140.4 (d,  $J$  = 3.0 Hz, C<sub>q</sub>), 137.4 (C<sub>q</sub>), 129.6 (CH), 128.2 (CH), 127.6 (CH), 127.5 (CH), 125.0 (d,  $J$  = 34.0 Hz, 2x CH), 115.1 (d,  $J$  = 21.5 Hz, 2x CH), 82.5 (C<sub>q</sub>), 62.4 (CH<sub>3</sub>), 32.4 (CH<sub>2</sub>); **<sup>19</sup>F-NMR** (375 MHz, CDCl<sub>3</sub>):  $\delta$  (ppm) = -115.5; **IR** (KBr):  $\tilde{\nu}$  (cm<sup>-1</sup>) = 3422, 3009, 2987, 2944, 2904, 2824, 1654, 1603, 1508, 1477, 1459, 1416, 1218, 1189, 1159, 1052, 1023, 917, 856, 831, 809, 768, 747, 725, 652, 583; **HR-MS** (ESI<sup>+</sup>): calcd. for C<sub>16</sub>H<sub>14</sub>FNO<sub>2</sub>Na ([M+Na]<sup>+</sup>): 294.0901, found: 294.0897; **M(C<sub>16</sub>H<sub>14</sub>FNO<sub>2</sub>)**: 271.29.

## 2-Hydroxy oxime ether 1p

According to the [general procedure 1](#), the Grignard reagent was synthesized from magnesium turnings (498 mg, 20.5 mmol, 4.10 equiv) and 1-bromo-4-(trifluoromethyl)-benzene (2.80 mL, 20.0 mmol, 4.00 equiv) in 20 mL abs. THF, and then treated with 1,2-indandione-2-oxime ether **S3a** (876 mg, 5.00 mmol, 1.00 equiv) dissolved in 25 mL abs. THF. Compound **1p** was obtained as a colorless solid (1.60 g, >99%).

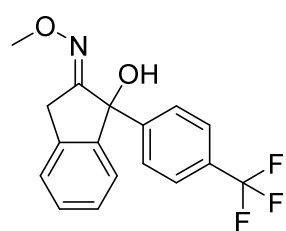

**R<sub>f</sub>**: 0.33 (20% MTBE/hexane); **mp.**: 57 – 59 °C; **<sup>1</sup>H-NMR** (400 MHz, CDCl<sub>3</sub>): δ (ppm) = 7.57 (d', *J* = 8.5 Hz, 2H), 7.48 (d', *J* = 8.5 Hz, 2H), 7.37 – 7.36 (m, 2H), 7.31 – 7.27 (m, 1H), 7.23 – 7.21 (m, 1H), 4.03 (d, *J* = 22.0 Hz, 1H), 3.90 (s, 3H), 3.78 (d, *J* = 22.0 Hz, 1H), 3.12 (bs, 1H); **<sup>13</sup>C-NMR** (100 MHz, CDCl<sub>3</sub>): δ (ppm) = 165.6 (C=N), 148.6 (C<sub>q</sub>), 145.3 (C<sub>q</sub>), 137.5 (C<sub>q</sub>), 129.8 (CH), 129.7 (q, *J* = 32.5 Hz, C<sub>q</sub>), 128.4 (CH), 126.1 (2x CH), 125.4 (CH), 125.3 (q, *J* = 4.0 Hz, 2x CH), 124.9 (CH), 124.3 (q, *J* = 272.0 Hz, C<sub>q</sub>), 82.7 (C<sub>q</sub>), 62.5 (CH<sub>3</sub>), 32.6 (CH<sub>2</sub>); **<sup>19</sup>F-NMR** (375 MHz, CDCl<sub>3</sub>): δ (ppm) = –62.5. **IR** (KBr):  $\tilde{\nu}$  (cm<sup>-1</sup>) = 3427, 3074, 2968, 2939, 2901, 2820, 1731, 715, 1659, 1617, 1480, 1462, 1412, 1325, 1196, 1165, 1126, 1068, 1040, 1017, 918, 872, 835, 767, 751, 733, 724, 650, 601, 438; **HR-MS** (ESI<sup>+</sup>): calcd. for C<sub>17</sub>H<sub>14</sub>F<sub>3</sub>NO<sub>2</sub>Na ([M+Na]<sup>+</sup>): 344.0869, found: 344.0865; **M(C<sub>17</sub>H<sub>14</sub>F<sub>3</sub>NO<sub>2</sub>)**: 321.30.

## 2-Hydroxy oxime ether 1q

According to the [general procedure 1](#), the Grignard reagent was synthesized from magnesium turnings (299 mg, 12.3 mmol, 4.10 equiv) and 1-bromo-3,5-bis(trifluoromethyl)-benzene (2.10 mL, 12.0 mmol, 4.00 equiv) in 15 mL abs. THF, and then treated with 1,2-indandione-2-oxime ether **S3a** (526 mg, 3.00 mmol, 1.00 equiv) dissolved in 20 mL abs. THF. Compound **1q** was obtained as a colorless solid (1.08 g, 93%).

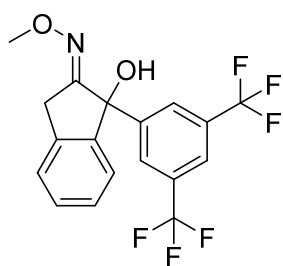

**R<sub>f</sub>**: 0.16 (10% MTBE/hexane); **mp.**: 96 – 97 °C; **<sup>1</sup>H-NMR** (400 MHz, CDCl<sub>3</sub>): δ (ppm) = 7.82 (s, 2H), 7.78 (s, 1H), 7.41 – 7.40 (m, 2H), 7.35 – 7.30 (m, 1H, CH), 7.20 (d, *J* = 7.5 Hz, 1H), 4.04 (d, *J* = 22.0 Hz, 1H), 3.92 (s, 3H), 3.83 (d, *J* = 22.0 Hz, 1H), 2.97 (bs, 1H); **<sup>13</sup>C-NMR** (100 MHz, CDCl<sub>3</sub>): δ (ppm) = 164.8 (C=N), 147.2 (C<sub>q</sub>), 144.5 (C<sub>q</sub>), 137.7 (C<sub>q</sub>), 131.6 (q, *J* = 33.0 Hz, C<sub>q</sub>), 130.4 (CH), 128.7 (CH), 126.2 (2x CH), 125.7 (CH), 124.8 (CH), 123.4 (q, *J* = 273.0 Hz, C<sub>q</sub>), 121.6 (m, CH), 82.3 (C<sub>q</sub>), 62.7 (CH<sub>3</sub>), 32.5 (CH<sub>2</sub>); **<sup>19</sup>F-NMR** (375 MHz, CDCl<sub>3</sub>): δ (ppm) = –62.7. **IR** (KBr):  $\tilde{\nu}$  (cm<sup>-1</sup>) = 3448, 2980, 2943, 1624, 1464, 1356, 1281, 1184, 1169, 1124, 1022, 859, 768, 682; **HR-MS** (ESI<sup>+</sup>): calcd. for C<sub>18</sub>H<sub>13</sub>F<sub>6</sub>NO<sub>2</sub>Na ([M+Na]<sup>+</sup>): 412.0743, found: 412.0731. **M(C<sub>18</sub>H<sub>13</sub>F<sub>6</sub>NO<sub>2</sub>)**: 389.30.

## 2-Hydroxy oxime ether 1r

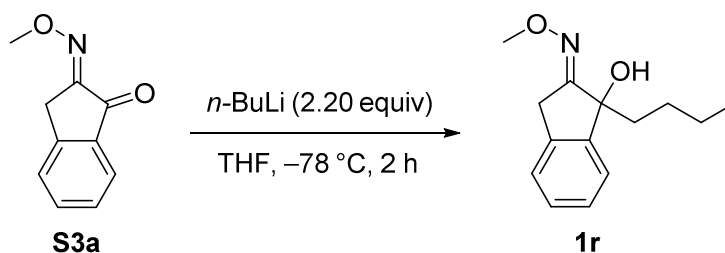

A solution of 1,2-indanedione-2-oxime ether **S3a** (876 mg, 5.00 mmol, 1.00 equiv) in 25 mL abs. THF was cooled to  $-78\text{ }^{\circ}\text{C}$  and treated with *n*-butyllithium\* (4.40 mL, 2.5 M in *n*-hexane, 11.0 mmol, 2.20 equiv) dropwise. After complete addition, the reaction mixture was stirred at  $-78\text{ }^{\circ}\text{C}$  for 2 hours and then quenched with sat.  $\text{NH}_4\text{Cl}$ -solution. The aqueous phase was separated and extracted twice with EtOAc. The combined organic phases were dried over  $\text{Na}_2\text{SO}_4$ , filtered and the solvent was removed under reduced pressure. The crude product was purified by flash column chromatography (DCM  $\rightarrow$  5%  $\rightarrow$  15% MTBE/hexane). Compound **1r** was obtained as a colorless oil (368 mg, 32%, 47% based on recovered starting material).

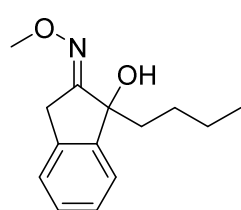

**R<sub>f</sub>**: 0.33 (30% MTBE/hexane); **<sup>1</sup>H-NMR** (400 MHz,  $\text{CDCl}_3$ ):  $\delta$  (ppm) = 7.44 – 7.40 (m, 1H), 7.33 – 7.25 (m, 3H), 3.96 (s, 3H), 3.87 (d,  $J = 22.0\text{ Hz}$ , 1H), 3.55 (d,  $J = 22.0\text{ Hz}$ , 1H), 2.49 (bs, 1H), 2.07 (ddd,  $J = 13.0, 11.5, 4.5\text{ Hz}$ , 1H), 1.98 (ddd,  $J = 13.0, 11.5, 4.5\text{ Hz}$ , 1H), 1.29 – 1.12 (m, 3H), 1.04 – 0.93 (m, 1H), 0.82 (t,  $J = 7.0\text{ Hz}$ , 3H); **<sup>13</sup>C-NMR** (100 MHz,  $\text{CDCl}_3$ ):  $\delta$  (ppm) = 165.2 (C=N), 144.9 ( $\text{C}_q$ ), 137.5 ( $\text{C}_q$ ), 129.2 (CH), 127.8 (CH), 125.1 (CH), 123.7 (CH), 81.8 ( $\text{C}_q$ ), 62.3 ( $\text{CH}_3$ ), 41.9 ( $\text{CH}_2$ ), 32.5 ( $\text{CH}_2$ ), 26.3 ( $\text{CH}_2$ ), 23.0 ( $\text{CH}_2$ ), 14.0 ( $\text{CH}_3$ ); **IR** (film):  $\tilde{\nu}$  ( $\text{cm}^{-1}$ ) = 3432, 3028, 2955, 2935, 2903, 2871, 2859, 1608, 1479, 1462, 1409, 1047, 1028, 955, 893, 850, 770, 744, 729, 627; **HR-MS** (ESI<sup>+</sup>): calcd. for  $\text{C}_{14}\text{H}_{19}\text{NO}_2\text{Na}$  ( $[\text{M}+\text{Na}]^+$ ): 256.1308, found: 256.1305; **M**( $\text{C}_{14}\text{H}_{19}\text{NO}_2$ ): 233.31.

## 2-Hydroxy oxime ether 1s

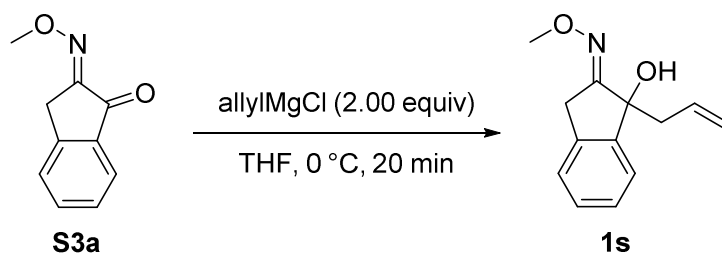

\* Commercially available as well as self-made solutions of *n*-BuMgBr in THF were tried for this reaction but failed due to inseparable byproduct formation.



A solution of 1,2-indanedione-2-oxime ether **S3a** (876 mg, 5.00 mmol, 1.00 equiv) in 25 mL abs. THF was cooled to 0 °C and treated with allylmagnesium chloride (5.88 mL, 1.7 M in THF, 10.0 mmol, 2.00 equiv) dropwise. After complete addition, the reaction mixture was stirred at 0 °C for 20 min and then quenched with sat. NH<sub>4</sub>Cl-solution. The aqueous phase was separated and extracted twice with EtOAc. The combined organic phases were dried over Na<sub>2</sub>SO<sub>4</sub>, filtered and the solvent was removed under reduced pressure. The crude product was purified by flash column chromatography (5% → 15% MTBE/hexane). Compound **1s** was obtained as a colorless solid (490 mg, 45%).

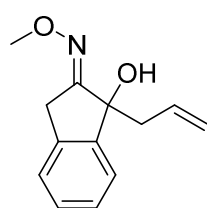

**R<sub>f</sub>**: 0.19 (20% MTBE/hexane); **mp.**: 33 – 34 °C; **<sup>1</sup>H-NMR** (400 MHz, CDCl<sub>3</sub>): δ (ppm) = 7.48 – 7.44 (m, 1H), 7.36 – 7.32 (m, 2H), 7.30 – 7.27 (m, 1H), 5.67 (dddd, *J* = 17.0, 10.0, 8.0, 7.0 Hz, 1H), 5.11 – 5.05 (m, 2H), 3.99 (s, 3H), 3.89 (d, *J* = 22.0 Hz, 1H), 3.54 (d, *J* = 22.0 Hz, 1H), 2.80 – 2.77 (m, 2H), 2.70 (bs, 1H); **<sup>13</sup>C-NMR** (100 MHz, CDCl<sub>3</sub>): δ (ppm) = 164.7 (C=N), 144.4 (C<sub>q</sub>), 137.4 (C<sub>q</sub>), 132.1 (CH), 129.3 (CH), 127.7 (CH), 125.1 (CH), 124.0 (CH), 119.7 (CH<sub>2</sub>), 80.8 (C<sub>q</sub>), 62.3 (CH<sub>3</sub>), 46.4 (CH<sub>2</sub>), 32.3 (CH<sub>2</sub>); **IR** (KBr):  $\tilde{\nu}$  (cm<sup>-1</sup>) = 3425, 3071, 2978, 2939, 2819, 1641, 1607, 1481, 1463, 1434, 1410, 1375, 1049, 1023, 994, 927, 877, 834, 775, 746, 730, 686; **HR-MS** (ESI<sup>+</sup>): calcd. for C<sub>13</sub>H<sub>15</sub>NO<sub>2</sub>Na ([M+Na]<sup>+</sup>): 240.0995, found: 240.0993; **M(C<sub>13</sub>H<sub>15</sub>NO<sub>2</sub>)**: 217.27.

## 2-Hydroxy oxime ether **1t**

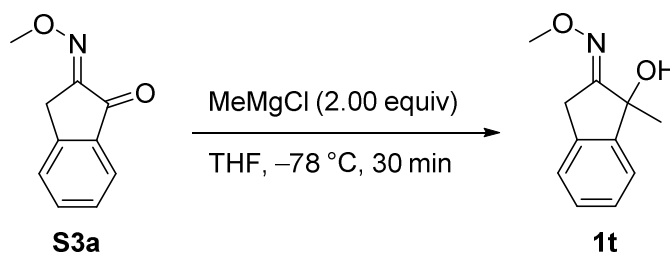

A solution of 1,2-indanedione-2-oxime ether **S3a** (876 mg, 5.00 mmol, 1.00 equiv) in 25 mL abs. THF was cooled to –78 °C and treated with methylmagnesium chloride (3.33 mL, 3.0 M in THF, 10.0 mmol, 2.00 equiv) dropwise. After complete addition, the reaction mixture was stirred at –78 °C for 30 min and then quenched with sat. NH<sub>4</sub>Cl-solution. The aqueous phase was separated and extracted twice with EtOAc. The combined organic phases were dried over Na<sub>2</sub>SO<sub>4</sub>, filtered and the solvent was removed under reduced pressure. The crude product was purified by flash column chromatography (5% → 15% MTBE/hexane). Compound **1t** was obtained as a brown oil (405 mg, 42%).

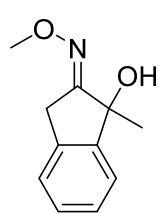

**R<sub>f</sub>**: 0.41 (40% MTBE/hexane); **<sup>1</sup>H-NMR** (300 MHz, CDCl<sub>3</sub>): δ (ppm) = 7.48 – 7.44 (m, 1H), 7.34 – 7.24 (m, 3H), 3.95 (s, 3H), 3.86 (d, *J* = 22.0 Hz, 1H), 3.64 (d, *J* = 22.0 Hz, 1H), 2.56 (bs, 1H), 1.70 (s, 3H); **<sup>13</sup>C-NMR** (75 MHz, CDCl<sub>3</sub>): δ (ppm) = 165.6 (C=N), 146.0 (C<sub>q</sub>), 136.9 (C<sub>q</sub>), 129.3 (CH), 127.9 (CH), 125.2 (CH), 123.4 (CH), 78.8 (C<sub>q</sub>), 62.2 (CH<sub>3</sub>), 31.8 (CH<sub>2</sub>), 28.3 (CH<sub>3</sub>); **IR** (film):  $\tilde{\nu}$  (cm<sup>-1</sup>) = 3419, 2972, 2937, 2898, 2817, 1660, 1609, 1480, 1463, 1366, 1147, 1105, 1081, 1041, 930, 896, 843, 764, 743, 727, 628, 442; **HR-MS** (ESI<sup>+</sup>): calcd. for C<sub>11</sub>H<sub>13</sub>NO<sub>2</sub>Na ([M+Na]<sup>+</sup>): 214.0839, found: 214.0836; **M(C<sub>11</sub>H<sub>13</sub>NO<sub>2</sub>)**: 191.23.

## 2-Hydroxy oxime ether 1u

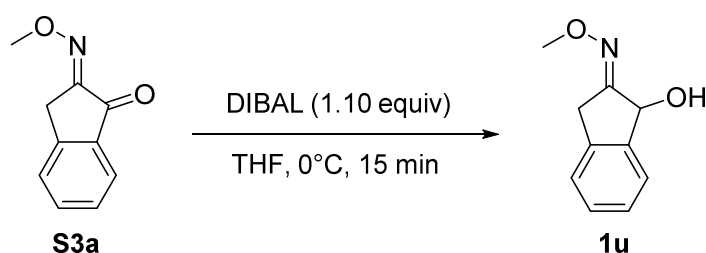

A solution of 1,2-indanedione-2-oxime ether **S3a** (526 mg, 3.00 mmol, 1.00 equiv) in 10 mL abs. THF was cooled to 0 °C and treated with DIBAL (2.75 mL, 1.2 M in toluene, 3.30 mmol, 1.10 equiv) dropwise. After complete addition, the reaction mixture was stirred at 0 °C for 15 min and then quenched with 0.1 M HCl-solution. The aqueous phase was separated and extracted twice with EtOAc. The combined organic phases were dried over Na<sub>2</sub>SO<sub>4</sub>, filtered and the solvent was removed under reduced pressure. The crude product was purified by flash column chromatography (30% → 40% MTBE/hexane). Compound **1u** was obtained as a colorless solid (461 mg, 87%).

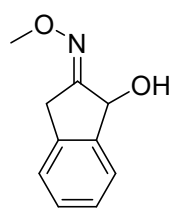

**R<sub>f</sub>**: 0.46 (50% MTBE/hexane); **mp.**: 98 – 100 °C; **<sup>1</sup>H-NMR** (300 MHz, CDCl<sub>3</sub>): δ (ppm) = 7.53 – 7.50 (m, 1H), 7.36 – 7.28 (m, 3H), 5.59 (m, 1H), 3.97 (s, 3H), 3.87 (d, *J* = 22.0 Hz, 1H), 3.64 (d, *J* = 22.0 Hz, 1H), 2.98 – 2.96 (m, 1H); **<sup>13</sup>C-NMR** (75 MHz, CDCl<sub>3</sub>): δ (ppm) = 163.2 (C=N), 141.5 (C<sub>q</sub>), 138.3 (C<sub>q</sub>), 129.6 (CH), 127.8 (CH), 125.5 (CH), 125.3 (CH), 73.9 (CH), 62.3 (CH<sub>3</sub>), 32.3 (CH<sub>2</sub>); **IR** (KBr):  $\tilde{\nu}$  (cm<sup>-1</sup>) = 3316, 3040, 2996, 2961, 2937, 2899, 2821, 1667, 1588, 1482, 1463, 1406, 1281, 1236, 1167, 1043, 1023, 909, 858, 747, 727, 612; **HR-MS** (ESI<sup>+</sup>): calcd. for C<sub>10</sub>H<sub>11</sub>NO<sub>2</sub>Na ([M+Na]<sup>+</sup>): 200.0682, found: 200.0680; **M(C<sub>10</sub>H<sub>11</sub>NO<sub>2</sub>)**: 177.20.

## 2.2 Procedures of other 2-Hydroxy Oxime Ethers

### 2-Hydroxy oxime ether 4

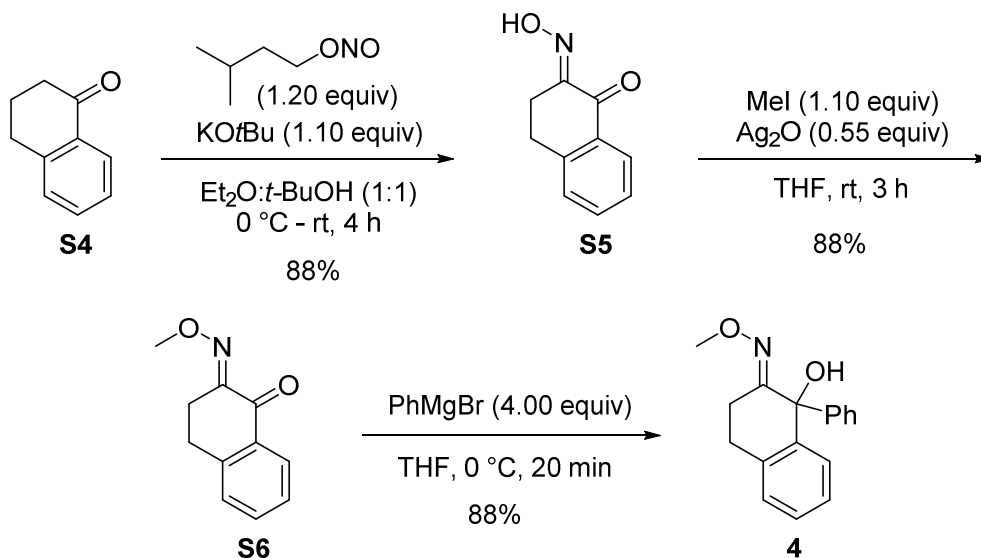

According to a modified procedure by Velasco *et al.*,<sup>3</sup> a solution of potassium *tert*-butanolate (4.94 g, 44.0 mmol, 1.10 equiv) and *iso*-amyl nitrite (6.46 mL, 48.0 mmol, 1.20 equiv) in 100 mL of a 1:1-mixture of Et<sub>2</sub>O and *tert*-butanol was treated with  $\alpha$ -tetralone **S4** (5.32 mL, 40.0 mmol, 1.00 equiv) dropwise at 0 °C. The reaction mixture was stirred at room temperature for 4 hours. The resulting precipitate was filtered and washed twice with MTBE. The filter cake was treated with 50 mL 1 N HCl-solution and extracted twice with CH<sub>2</sub>Cl<sub>2</sub>. The combined organic phases were dried over Na<sub>2</sub>SO<sub>4</sub>, filtered and the solvent was removed under reduced pressure. Compound **S5** was obtained as a brown, crystalline solid (6.15 g, 88%) and used without further purification for the subsequent reactions.

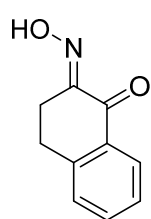

**R<sub>f</sub>**: 0.15 (1.0% MeOH/CH<sub>2</sub>Cl<sub>2</sub>); **mp.**: 119 – 121 °C; **<sup>1</sup>H-NMR** (400 MHz, DMSO-d<sub>6</sub>):  $\delta$  (ppm) = 12.54 (bs, 1H), 7.93 – 7.90 (m, 1H), 7.59 (td,  $J$  = 7.0, 1.5 Hz, 1H), 7.43 – 7.38 (m, 2H), 3.01 (m, 4H); **<sup>13</sup>C-NMR** (100 MHz, DMSO-d<sub>6</sub>):  $\delta$  (ppm) = 182.6 (C=O), 152.8 (C=N), 143.5 (C<sub>q</sub>), 133.8 (CH), 133.5 (C<sub>q</sub>), 128.8 (CH), 127.2 (CH), 127.0 (CH), 26.1 (CH<sub>2</sub>), 23.1 (CH<sub>2</sub>); **IR** (KBr):  $\tilde{\nu}$  (cm<sup>-1</sup>) = 3202, 2955, 2909, 1698, 1614, 1599, 1455, 1437, 1426, 1411, 1308, 1300, 1259, 1233, 1050, 1030, 1019, 907, 804, 735, 706, 658; **HR-MS** (ESI<sup>+</sup>): calcd. for C<sub>10</sub>H<sub>9</sub>NO<sub>2</sub>Na ([M+Na]<sup>+</sup>): 198.0526, found: 198.0521; **M(C<sub>10</sub>H<sub>9</sub>NO<sub>2</sub>)**: 175.19.

To a suspension of 2-(hydroxyimino)-1-tetralone **S5** (7.00 g, 40.0 mmol, 1.00 equiv) and Ag<sub>2</sub>O (5.10 g, 22.0 mmol, 0.55 equiv) in 50 mL abs. THF, methyl iodide (2.74 mL, 44.0 mmol, 1.10 equiv) was added dropwise at room temperature. The reaction mixture was stirred at room temperature for 3 hours and then filtered over Celite. The filter cake was washed twice with EtOAc. The solvent of the filtrate was removed under reduced pressure and the crude

product was recrystallized from EtOAc/hexane. Compound **S6** was obtained as brown crystals (6.64 g, 88%).

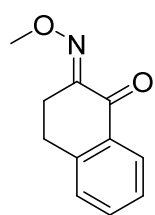

**R<sub>f</sub>**: 0.79 (1.0% MeOH/CH<sub>2</sub>Cl<sub>2</sub>); **mp.**: 96 – 98 °C; **<sup>1</sup>H-NMR** (400 MHz, CDCl<sub>3</sub>):  $\delta$  (ppm) = 8.10 (dd,  $J$  = 8.0, 1.5 Hz, 1H), 7.51 (td,  $J$  = 7.5, 1.5 Hz, 1H), 7.35 (td,  $J$  = 7.5, 1.0 Hz, 1H), 7.28 – 7.26 (m, 1H), 4.15 (s, 3H), 3.09 – 3.02 (m, 4H); **<sup>13</sup>C-NMR** (100 MHz, CDCl<sub>3</sub>):  $\delta$  (ppm) = 182.8 (C=O), 153.0 (C=N), 143.1 (C<sub>q</sub>), 134.1 (CH), 133.7 (C<sub>q</sub>), 128.5 (2x CH), 127.3 (CH), 63.6 (CH<sub>3</sub>), 26.8 (CH<sub>2</sub>), 24.1 (CH<sub>2</sub>); **IR** (KBr):  $\tilde{\nu}$  (cm<sup>-1</sup>) = 3445, 2986, 2962, 2938, 2823, 1680, 1595, 1573, 1455, 1439, 1432, 1322, 1313, 1229, 1188, 1155, 1050, 1027, 1000, 893, 865, 798, 741, 731, 711, 645, 628; **HR-MS** (ESI<sup>+</sup>): calcd. for C<sub>11</sub>H<sub>11</sub>NO<sub>2</sub>Na ([M+Na]<sup>+</sup>): 212.0682, found: 212.0678; **M(C<sub>11</sub>H<sub>11</sub>NO<sub>2</sub>)**: 189.21.

According to general procedure 1, the Grignard reagent was synthesized from magnesium turnings (498 mg, 20.5 mmol, 4.10 equiv) and bromobenzene (2.11.0 mL, 20.0 mmol, 4.00 equiv) in 20 mL abs. THF, and then treated with 2-(methoxyimino)-1-tetralone **S6** (946 mg, 5.00 mmol, 1.00 equiv) dissolved in 25 mL abs. THF. After flash column chromatography (2% → 4% MTBE/hexane), compound **4** was obtained as an orange solid (1.18 g, 88%).

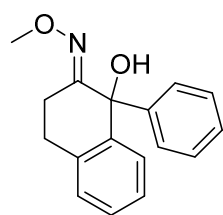

**R<sub>f</sub>**: 0.20 (5% MTBE/hexane); **mp.**: 111 – 112 °C; **<sup>1</sup>H-NMR** (300 MHz, CDCl<sub>3</sub>):  $\delta$  (ppm) = 7.91 (dd,  $J$  = 7.5, 1.5 Hz, 1H), 7.39 (tdd,  $J$  = 7.5, 1.5, 1.0 Hz, 1H), 7.29 (td,  $J$  = 7.5, 1.5 Hz, 1H), 7.27 – 7.22 (m, 3H), 7.15 – 7.11 (m, 3H), 4.61 (bs, 1H), 3.97 (s, 3H), 2.82 – 2.53 (m, 3H), 2.43 – 2.30 (m, 1H); **<sup>13</sup>C-NMR** (75 MHz, CDCl<sub>3</sub>):  $\delta$  (ppm) = 160.1 (C=N), 142.6 (C<sub>q</sub>), 140.4 (C<sub>q</sub>), 136.7 (C<sub>q</sub>), 128.6 (2x CH), 128.0 (CH), 127.8 (CH), 127.4 (CH), 127.0 (3x CH), 125.5 (CH), 76.2 (C<sub>q</sub>), 62.5 (CH<sub>3</sub>), 26.4 (CH<sub>2</sub>), 23.1 (CH<sub>2</sub>); **IR** (KBr):  $\tilde{\nu}$  (cm<sup>-1</sup>) = 3383, 3031, 2965, 2938, 2902, 2822, 1632, 1487, 1478, 1458, 1449, 1355, 1341, 1207, 1186, 1119, 1049, 983, 867, 839, 785, 774, 754, 700, 645, 624; **HR-MS** (ESI<sup>+</sup>): calcd. for C<sub>17</sub>H<sub>17</sub>NO<sub>2</sub>Na ([M+Na]<sup>+</sup>): 290.1152, found: 290.1153; **M(C<sub>17</sub>H<sub>17</sub>NO<sub>2</sub>)**: 267.33.

## 2-Hydroxy oxime ether 5

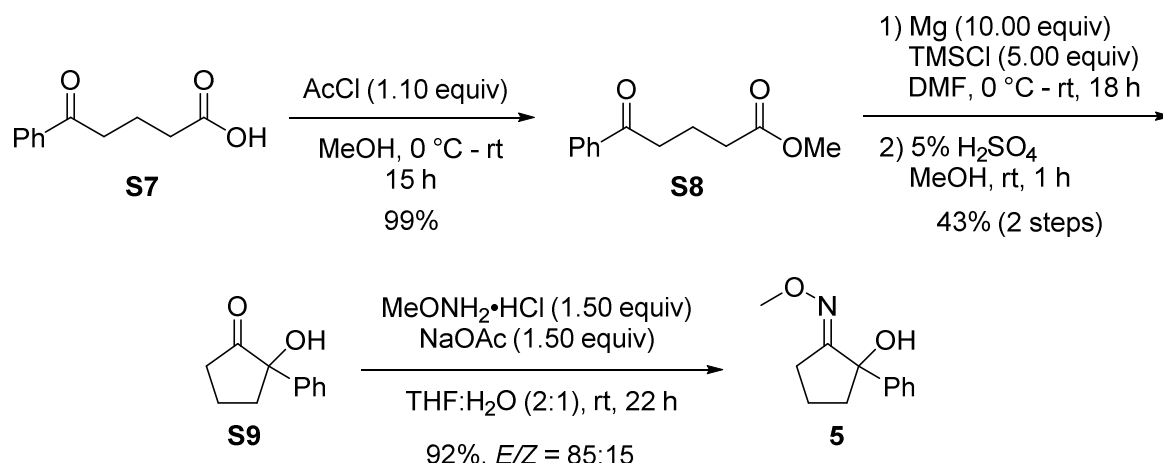

Methyl 5-oxo-5-phenylpentanoate **S8** was synthesized from carboxylic acid **S7** with 99% yield according to a procedure by Bergmeier *et al.* The spectroscopic data are in agreement with literature.<sup>4</sup>

2-Hydroxy-2-phenylcyclopentanone **S9** was synthesized from **S8** with 43% yield according to a procedure by Nishiguchi *et al.* The spectroscopic data are in agreement with literature.<sup>5</sup>

To a solution of **S9** (682 mg, 3.87 mmol, 1.00 equiv) in 9 mL of a 2:1-mixture of THF and H<sub>2</sub>O, methoxyamine hydrochloride (485 mg, 5.81 mmol, 1.50 equiv) was added portionwise followed by sodium acetate (476 mg, 5.81 mmol, 1.50 equiv). The reaction mixture was stirred at room temperature overnight. The aqueous phase was separated and extracted twice with EtOAc. The combined organic phases were washed once with sat. NaHCO<sub>3</sub>-solution and brine. It was dried over Na<sub>2</sub>SO<sub>4</sub>, filtered and the solvent was removed under reduced pressure. The crude product was purified by flash column chromatography (10% → 20% MTBE/hexane). Compound **5** was obtained as a yellowish oil (730 mg, 92%, *E/Z* = 85:15). The spectroscopic data are displayed for (*E*)-**5**.

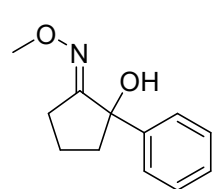

**R<sub>f</sub>**: 0.27 (20% MTBE/hexane); **<sup>1</sup>H-NMR** (400 MHz, CDCl<sub>3</sub>): δ (ppm) = 7.47 – 7.44 (m, 2H), 7.39 – 7.35 (m, 2H), 7.32 – 7.28 (m, 1H), 3.90 (s, 3H), 2.86 – 2.78 (m, 2H), 2.57 – 2.49 (m, 1H), 2.22 – 2.11 (m, 2H), 2.01 – 1.91 (m, 1H), 1.76 – 1.65 (m, 1H); **<sup>13</sup>C-NMR** (100 MHz, CDCl<sub>3</sub>): δ (ppm) = 167.6 (C=N), 144.5 (C<sub>q</sub>), 128.2 (2x CH), 127.5 (CH), 126.1 (2x CH), 81.6 (C<sub>q</sub>), 62.1 (CH<sub>3</sub>), 42.8 (CH<sub>2</sub>), 27.5 (CH<sub>2</sub>), 20.4 (CH<sub>2</sub>); **IR** (film):  $\tilde{\nu}$  (cm<sup>-1</sup>) = 3433, 3059, 2965, 2938, 1652, 1147, 1045, 874, 842, 760, 700; **HR-MS** (ESI<sup>+</sup>): calcd. for C<sub>12</sub>H<sub>15</sub>NO<sub>2</sub>Na ([M+Na]<sup>+</sup>): 228.0995, found: 228.0992; **M(C<sub>12</sub>H<sub>15</sub>NO<sub>2</sub>)**: 205.26.

## 2-Hydroxy oxime ether 6

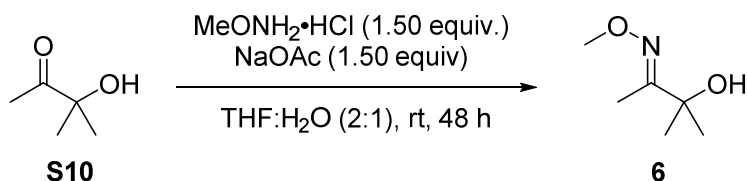

To a solution of **S10** (319  $\mu\text{L}$ , 3.00 mmol, 1.00 equiv) in 9 mL of a 2:1-mixture of THF and  $\text{H}_2\text{O}$ , methoxyamine hydrochloride (376 mg, 4.50 mmol, 1.50 equiv) was added portionwise followed by sodium acetate (369 mg, 4.50 mmol, 1.50 equiv). The reaction mixture was stirred at room temperature for 48 h. The aqueous phase was separated and extracted twice with EtOAc. The combined organic phases were washed once with sat.  $\text{NaHCO}_3$ -solution and brine. It was dried over  $\text{Na}_2\text{SO}_4$ , filtered and the solvent was removed under reduced pressure ( $>150$  mbar at  $40^\circ\text{C}$  since **6** is volatile). The crude product was purified by flash column chromatography (10%  $\rightarrow$  20% MTBE/hexane). Compound **6** was obtained as a colorless oil (327 mg, 83%).

**R<sub>f</sub>**: 0.30 (20% MTBE/hexane); **<sup>1</sup>H-NMR** (300 MHz,  $\text{CDCl}_3$ ):  $\delta$  (ppm) = 3.83 (s, 3H), 3.62 (bs, 1H), 1.82 (s, 3H), 1.32 (s, 6H); **<sup>13</sup>C-NMR** (100 MHz,  $\text{CDCl}_3$ ):  $\delta$  (ppm) = 160.8 (C=N), 72.4 ( $\text{C}_q$ ), 61.8 ( $\text{CH}_3$ ), 28.0 (2x  $\text{CH}_3$ ), 10.5 ( $\text{CH}_3$ ); **IR** (film):  $\tilde{\nu}$  ( $\text{cm}^{-1}$ ) = 3420, 2981, 2938, 818, 1636, 1464, 1367, 1173, 1143, 1053, 950, 893, 856; **HR-MS** (ESI<sup>+</sup>): calcd. for  $\text{C}_6\text{H}_{13}\text{NO}_2\text{Na}$  ( $[\text{M}+\text{Na}]^+$ ): 154.0839, found: 154.0836; **M**( $\text{C}_6\text{H}_{13}\text{NO}_2$ ): 131.18.

## 2-Hydroxy oxime ether 7

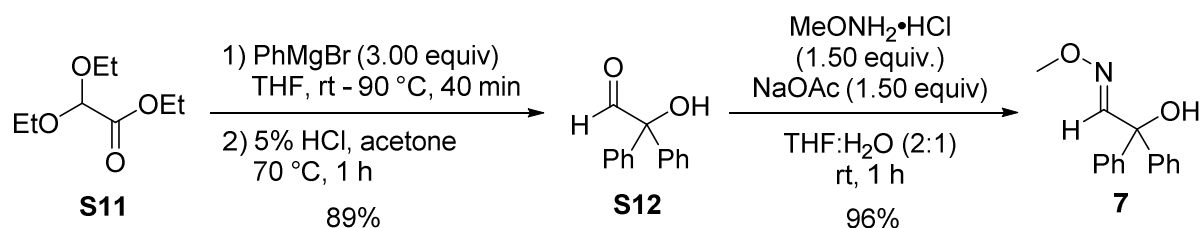

2-Hydroxy-2,2-diphenylacetaldehyde **S12** was synthesized from ester **S11** with 89% yield according to a slightly modified procedure by Wulff *et al.* The spectroscopic data are in agreement with literature.<sup>6</sup>

To a solution of **S12** (849 mg, 2.00 mmol, 1.00 equiv) in 12 mL of a 2:1-mixture of THF and  $\text{H}_2\text{O}$ , methoxyamine hydrochloride (501 mg, 3.00 mmol, 1.50 equiv) was added portionwise followed by sodium acetate (492 mg, 3.00 mmol, 1.50 equiv). The reaction mixture was stirred at room temperature for 1 h. The aqueous phase was separated and extracted twice with EtOAc. The combined organic phases were washed once with sat.  $\text{NaHCO}_3$ -solution

and brine. It was dried over Na<sub>2</sub>SO<sub>4</sub>, filtered and the solvent was removed under reduced pressure. The crude product was purified by flash column chromatography (2% → 5% MTBE/hexane). Compound **7** was obtained as a white solid (925 mg, 96%).

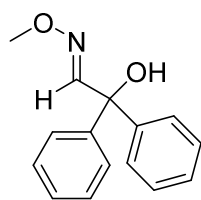

**R<sub>f</sub>**: 0.27 (10% MTBE/hexane); **mp.**: 62 – 64 °C; **<sup>1</sup>H-NMR** (400 MHz, CDCl<sub>3</sub>): δ (ppm) = 8.05 (s, 1H), 7.44 – 7.33 (m, 10H), 4.16 (bs, 1H), 3.96 (s, 3H); **<sup>13</sup>C-NMR** (100 MHz, CDCl<sub>3</sub>): δ (ppm) = 152.5 (HC=N), 144.0 (2x C<sub>q</sub>), 128.5 (4x CH), 127.9 (2x CH), 127.0 (4x CH), 77.5 (C<sub>q</sub>), 62.4 (CH<sub>3</sub>); **IR** (KBr):  $\tilde{\nu}$  (cm<sup>-1</sup>) = 3445, 3088, 3057, 3028, 2972, 2938, 2898, 2817, 1598, 1491, 1462, 1449, 1337, 1187, 1168, 1141, 1070, 1046, 1002, 992, 962, 901, 877, 785, 769, 760, 749, 699, 663, 636, 488; **HR-MS** (ESI<sup>+</sup>): calcd. for C<sub>15</sub>H<sub>15</sub>NO<sub>2</sub>Na ([M+Na]<sup>+</sup>): 264.0995, found: 264.0995; **M(C<sub>15</sub>H<sub>15</sub>NO<sub>2</sub>)**: 241.29.

## 2.3 $^1\text{H}$ -NMR and $^{13}\text{C}$ -NMR Spectra

1,2-Indandione-2-oxime S2a (DMSO- $d_6$ ,  $^1\text{H}$ -NMR: 400 MHz, APT: 100 MHz)

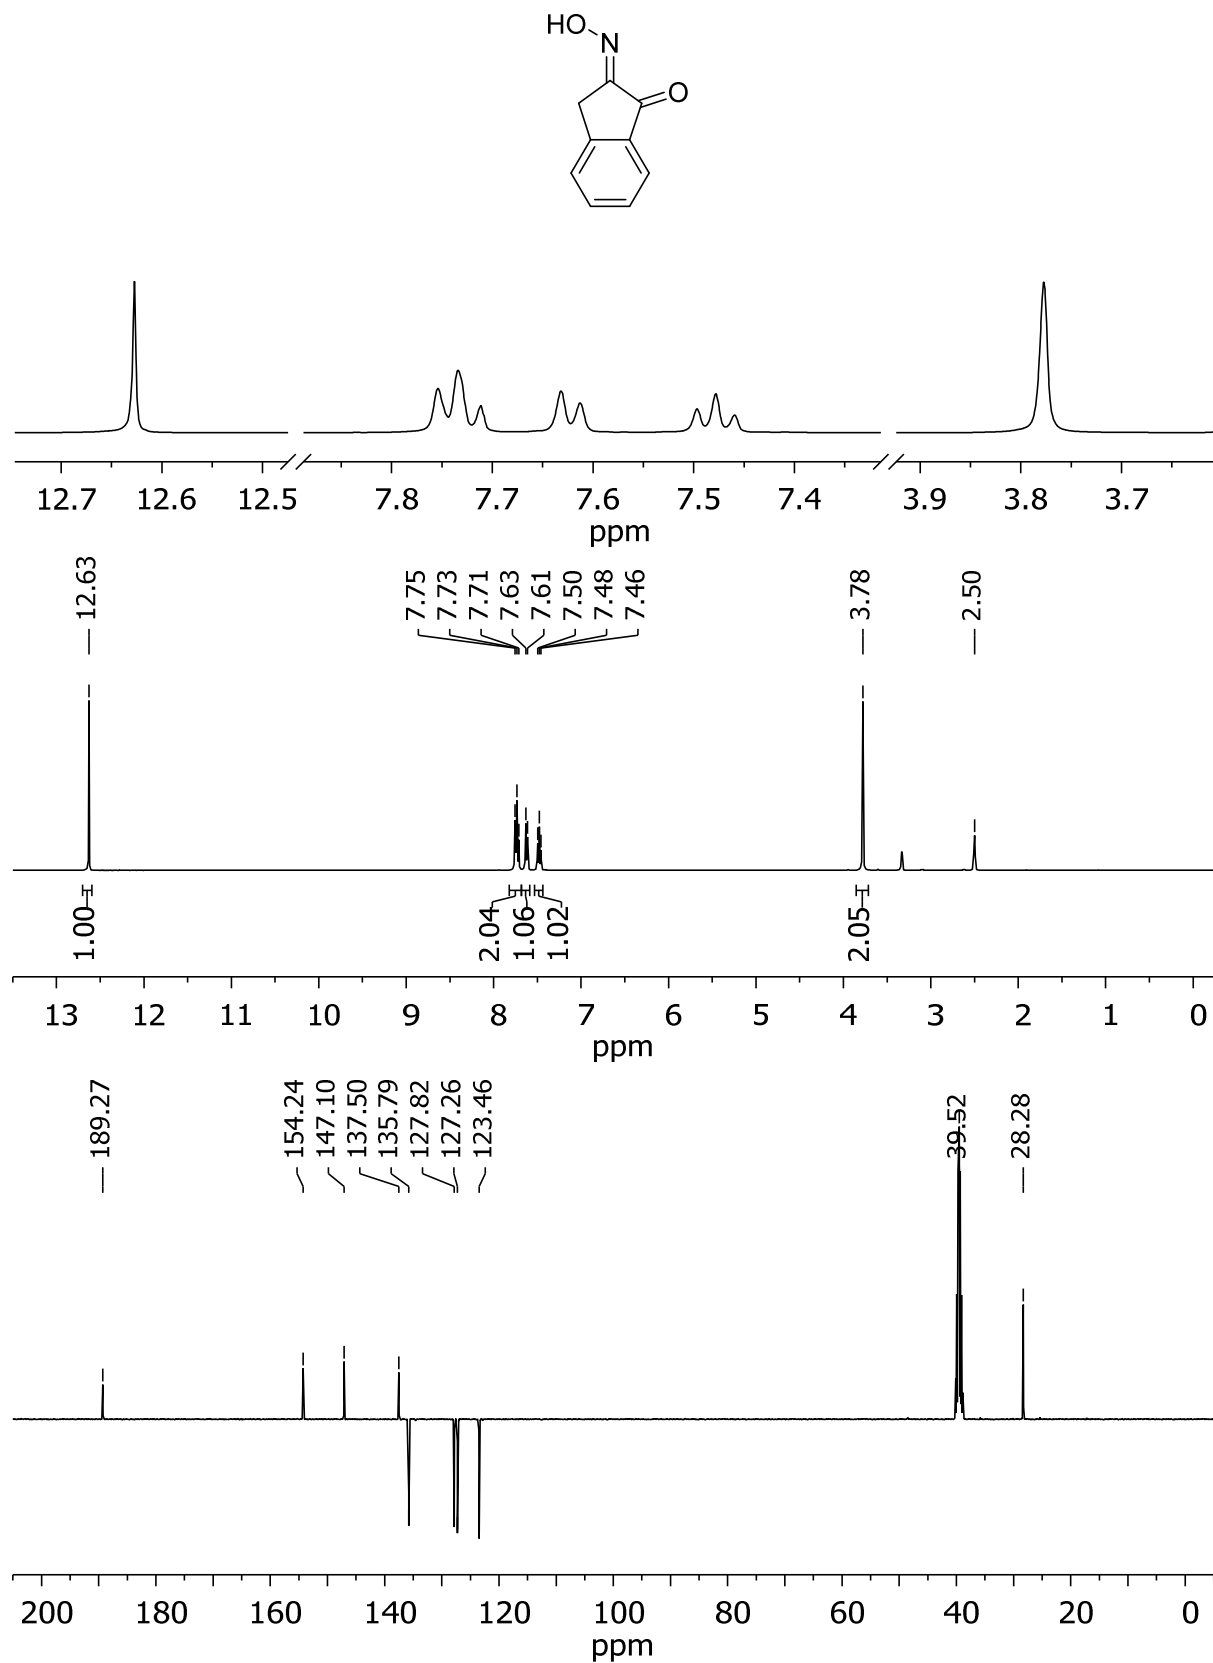



**1,2-Indandione-2-oxime S2b** (DMSO-d<sub>6</sub>, <sup>1</sup>H-NMR: 400 MHz, APT: 100 MHz)

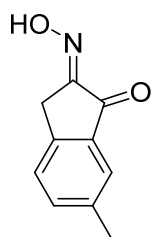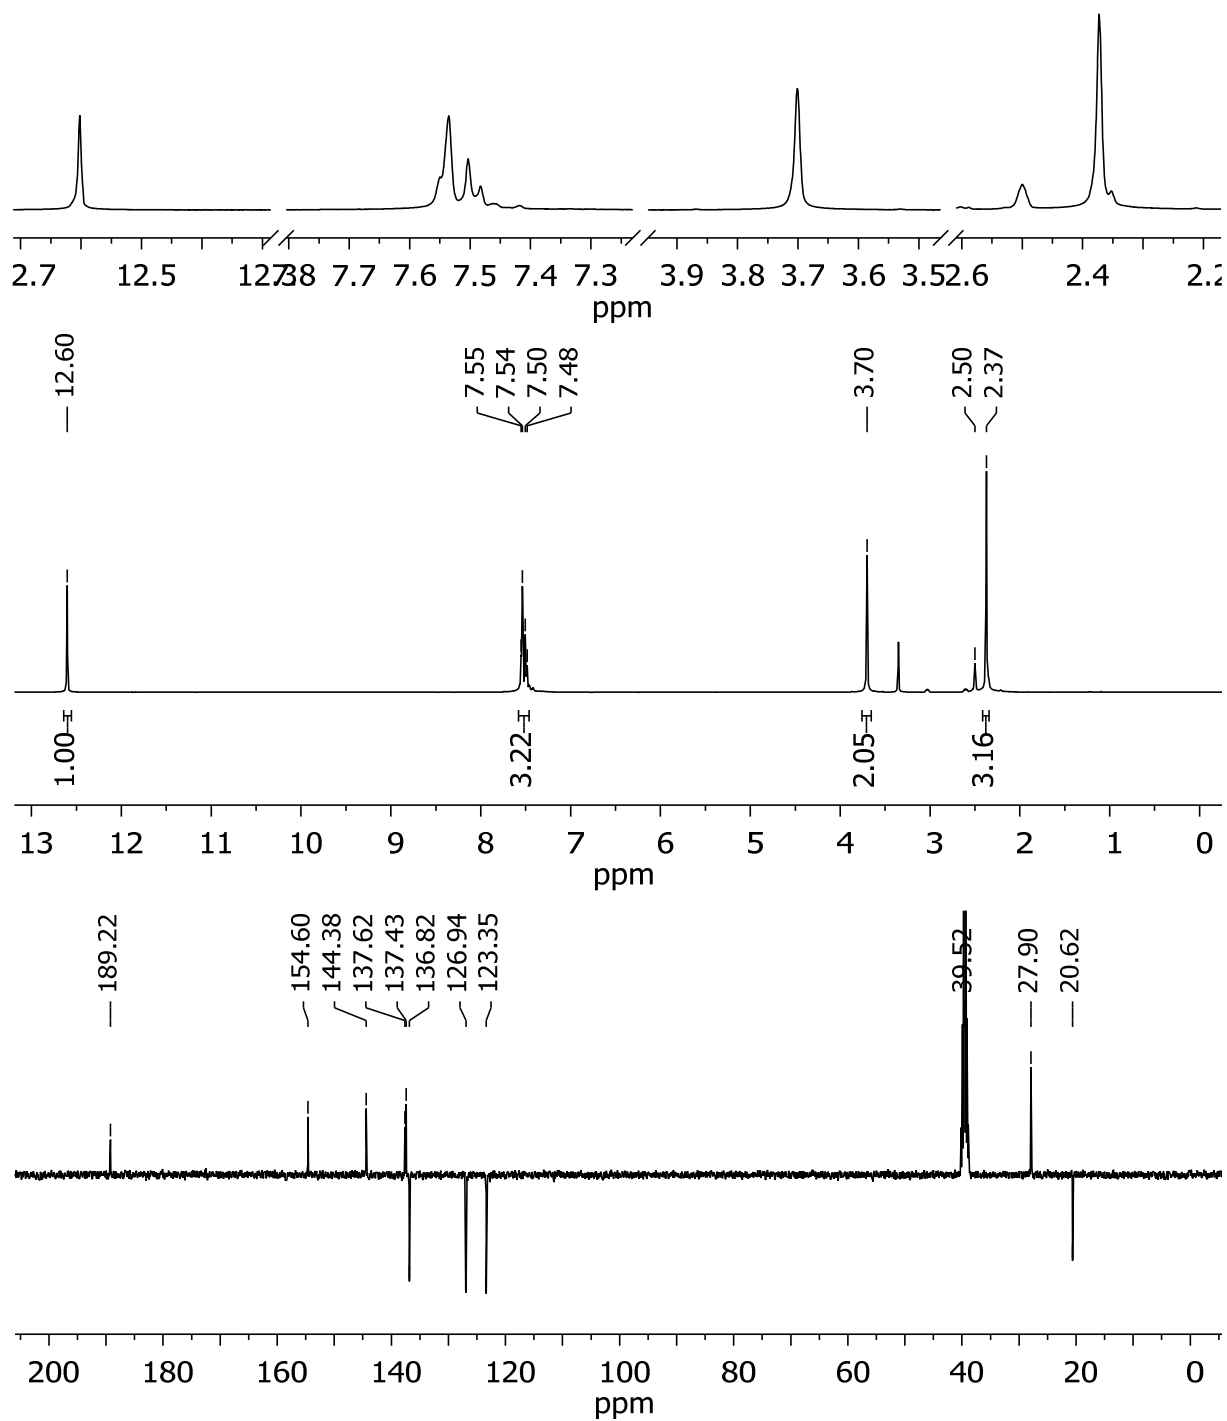

**1,2-Indandione-2-oxime S3a** (CDCl<sub>3</sub>, <sup>1</sup>H-NMR: 400 MHz, APT: 100 MHz)

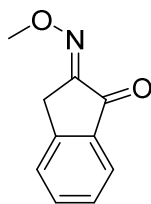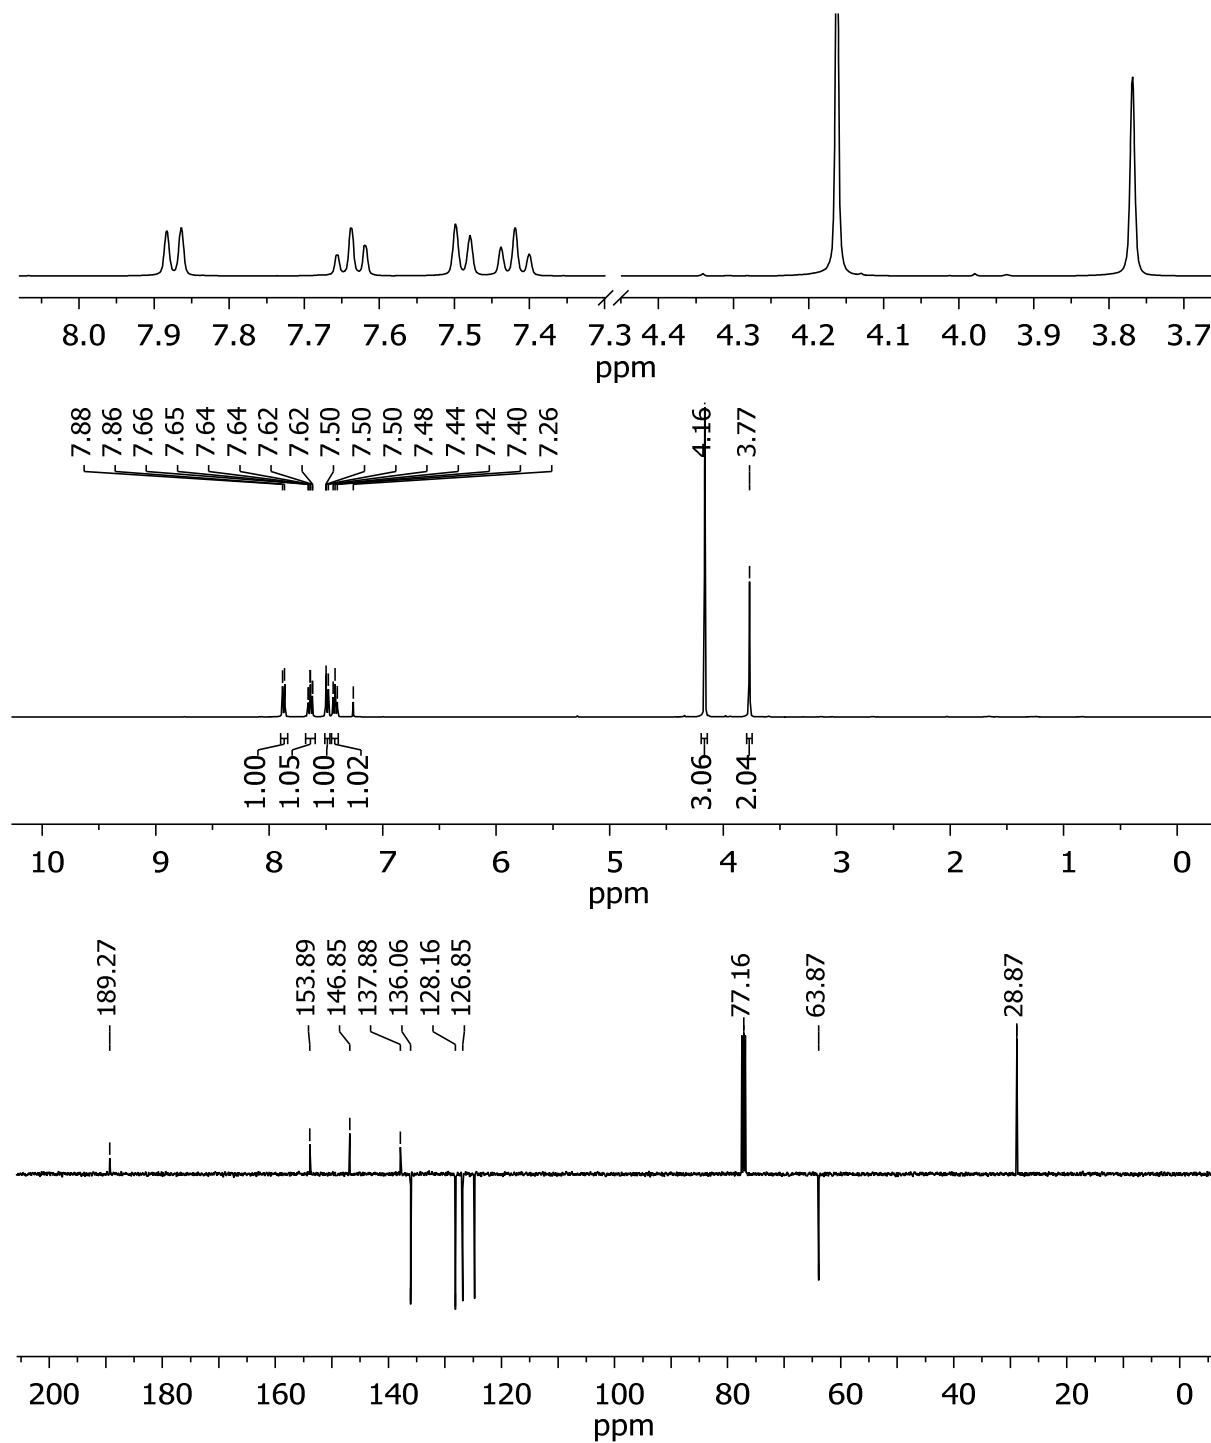

**1,2-Indandione-2-oxime S3b** (CDCl<sub>3</sub>, <sup>1</sup>H-NMR: 400 MHz, APT: 100 MHz)

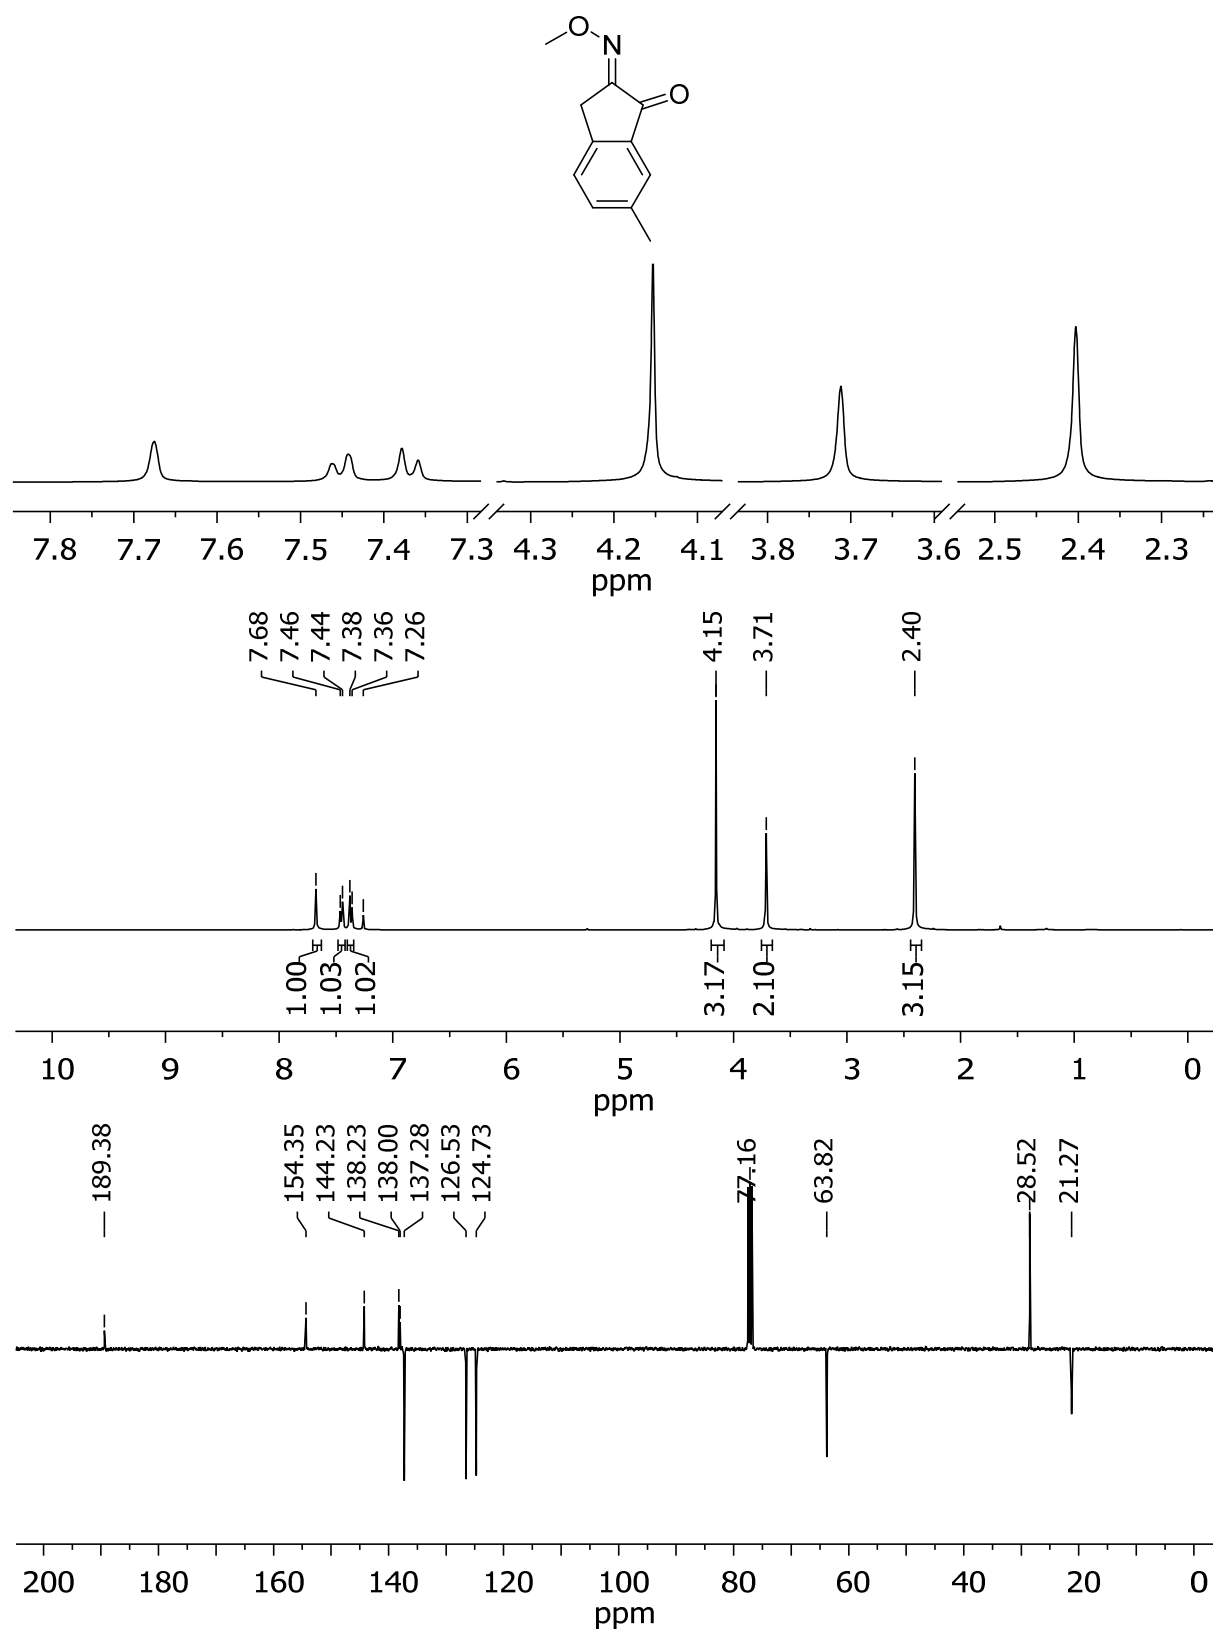

**2-Hydroxy oxime ether 1a** (CDCl<sub>3</sub>, <sup>1</sup>H-NMR: 400 MHz, APT: 100 MHz)

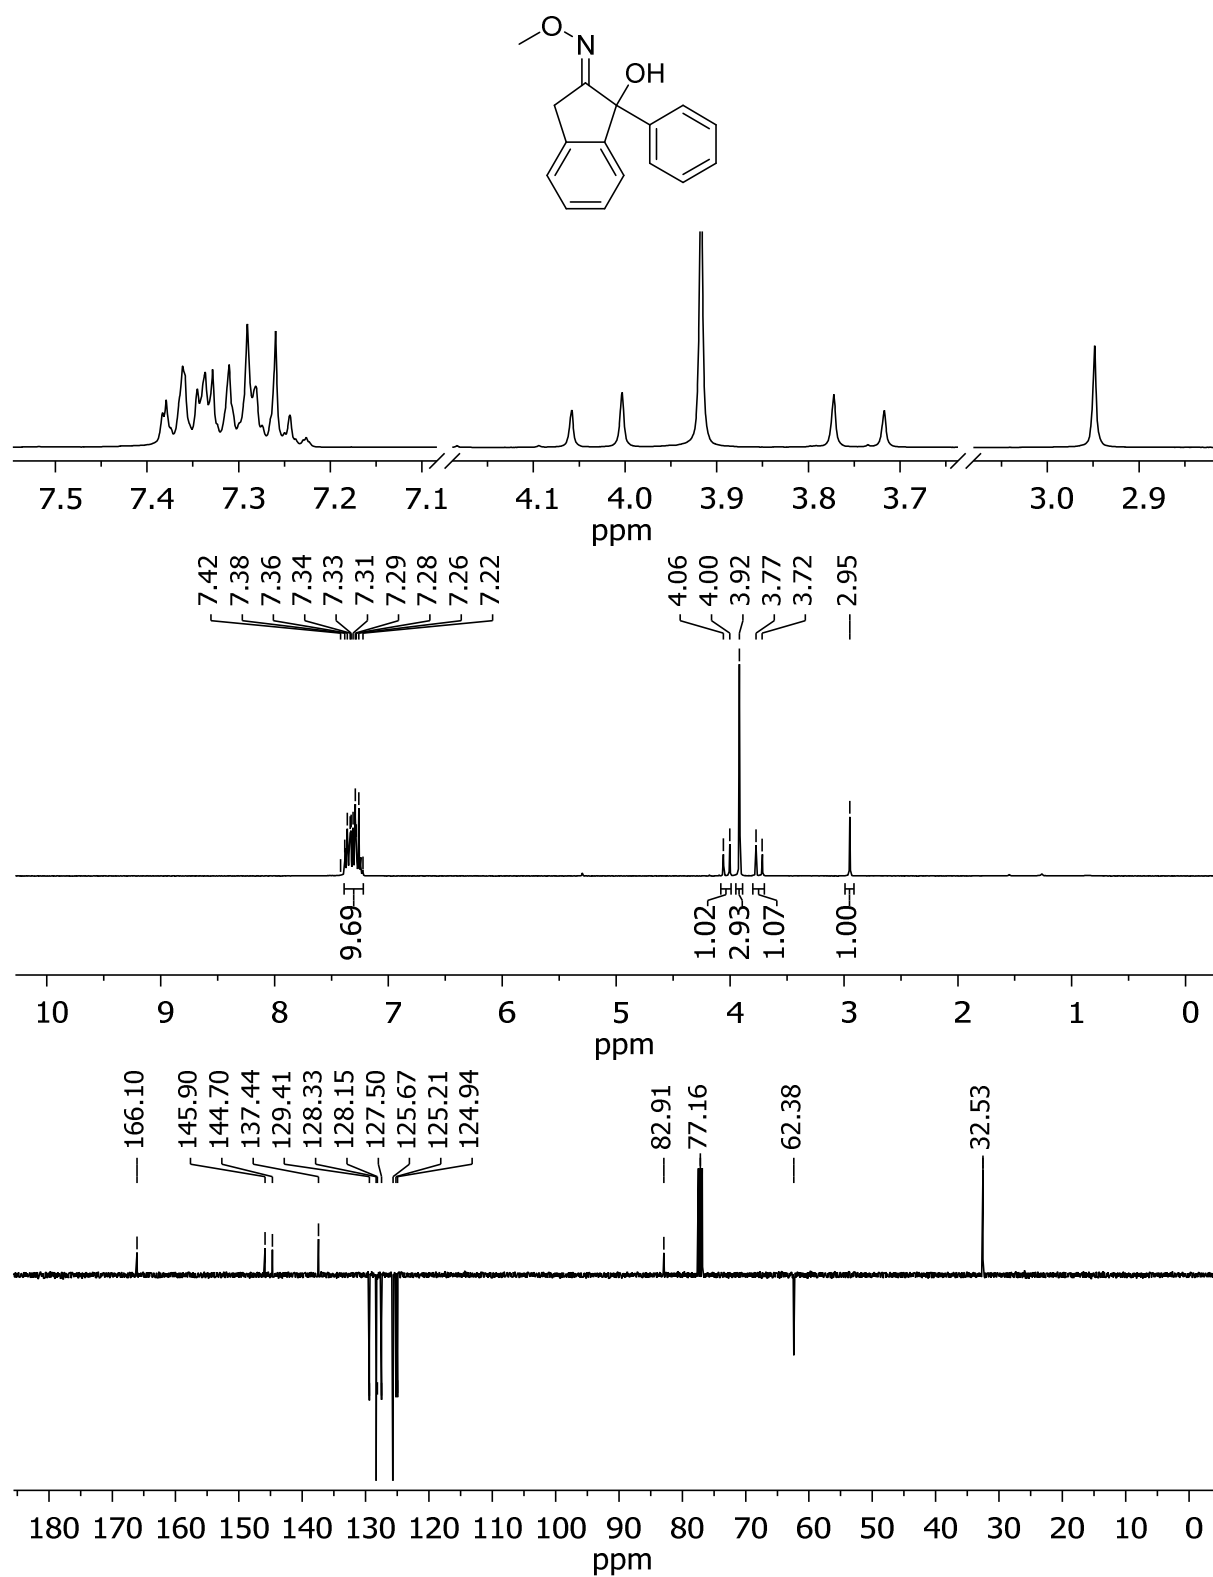

**2-Hydroxy oxime ether 1b** (CDCl<sub>3</sub>, <sup>1</sup>H-NMR: 300 MHz, APT: 75 MHz)

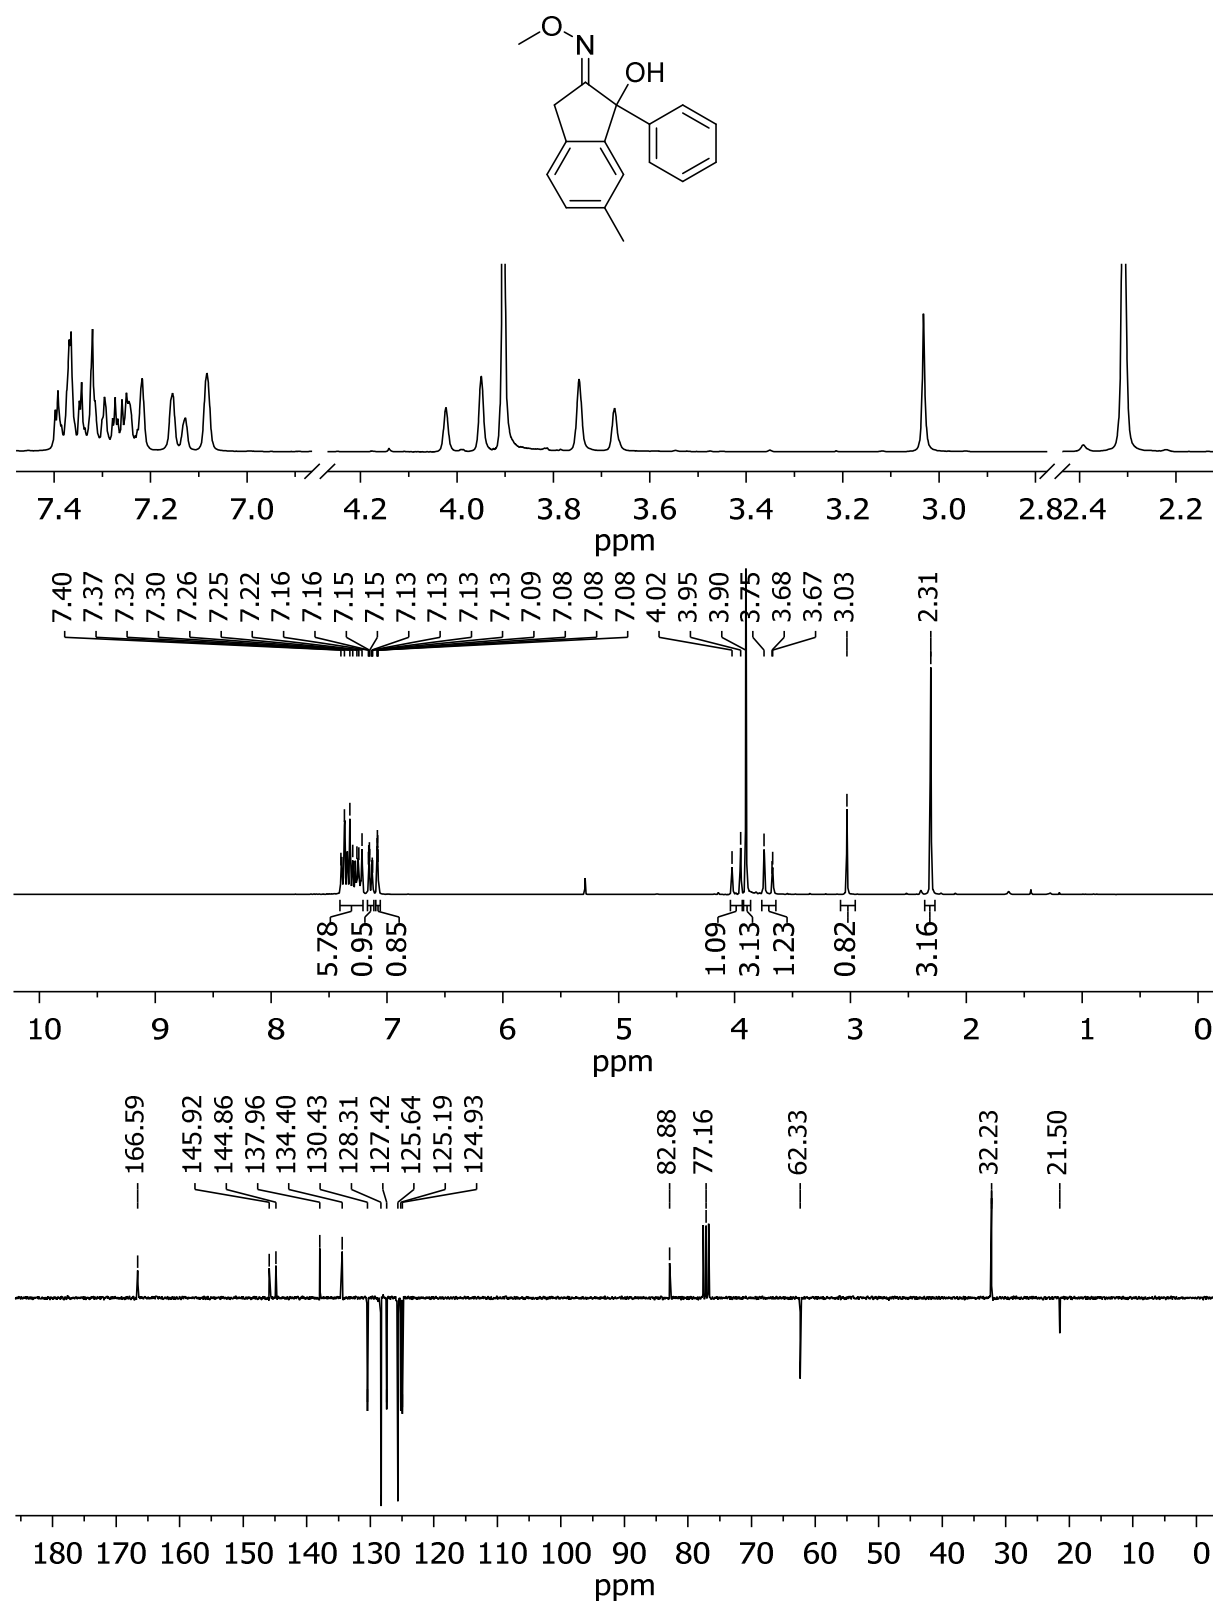

**2-Hydroxy oxime ether 1c** (CDCl<sub>3</sub>, <sup>1</sup>H-NMR: 400 MHz, APT: 75 MHz)

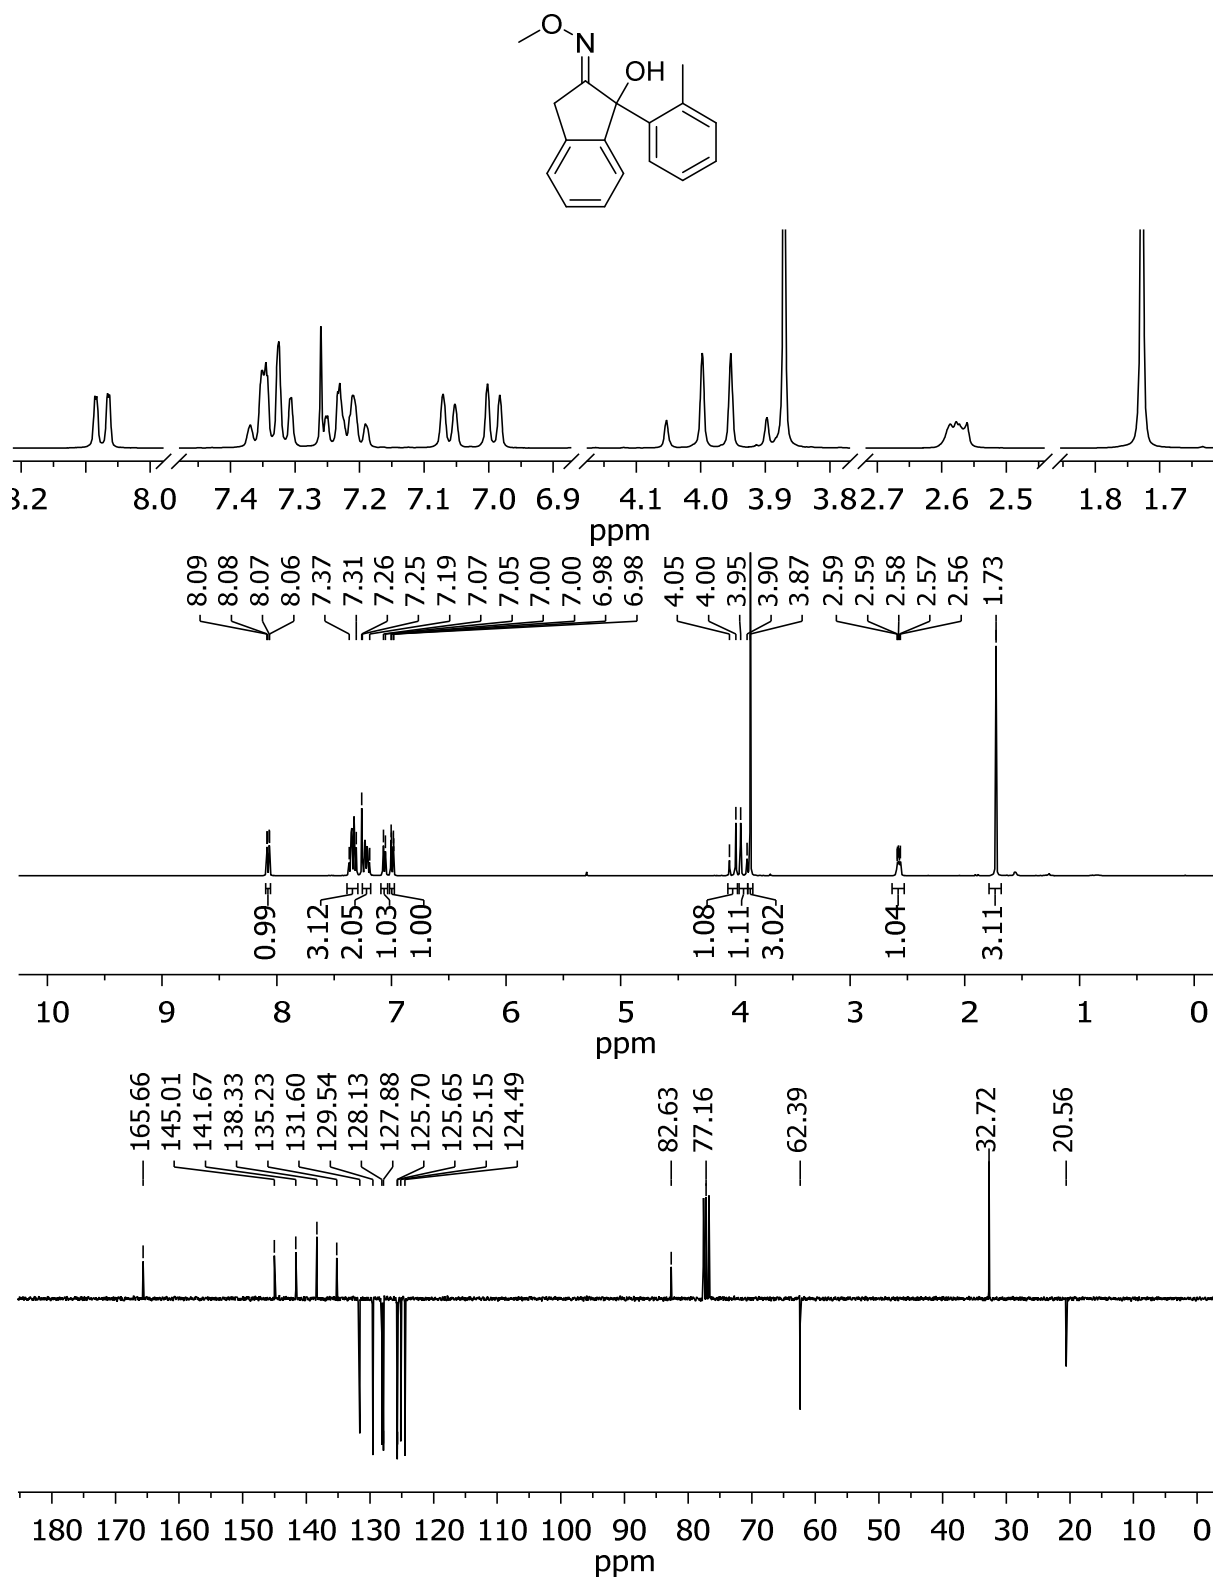

**2-Hydroxy oxime ether 1d** (CDCl<sub>3</sub>, <sup>1</sup>H-NMR: 400 MHz, APT: 100 MHz)

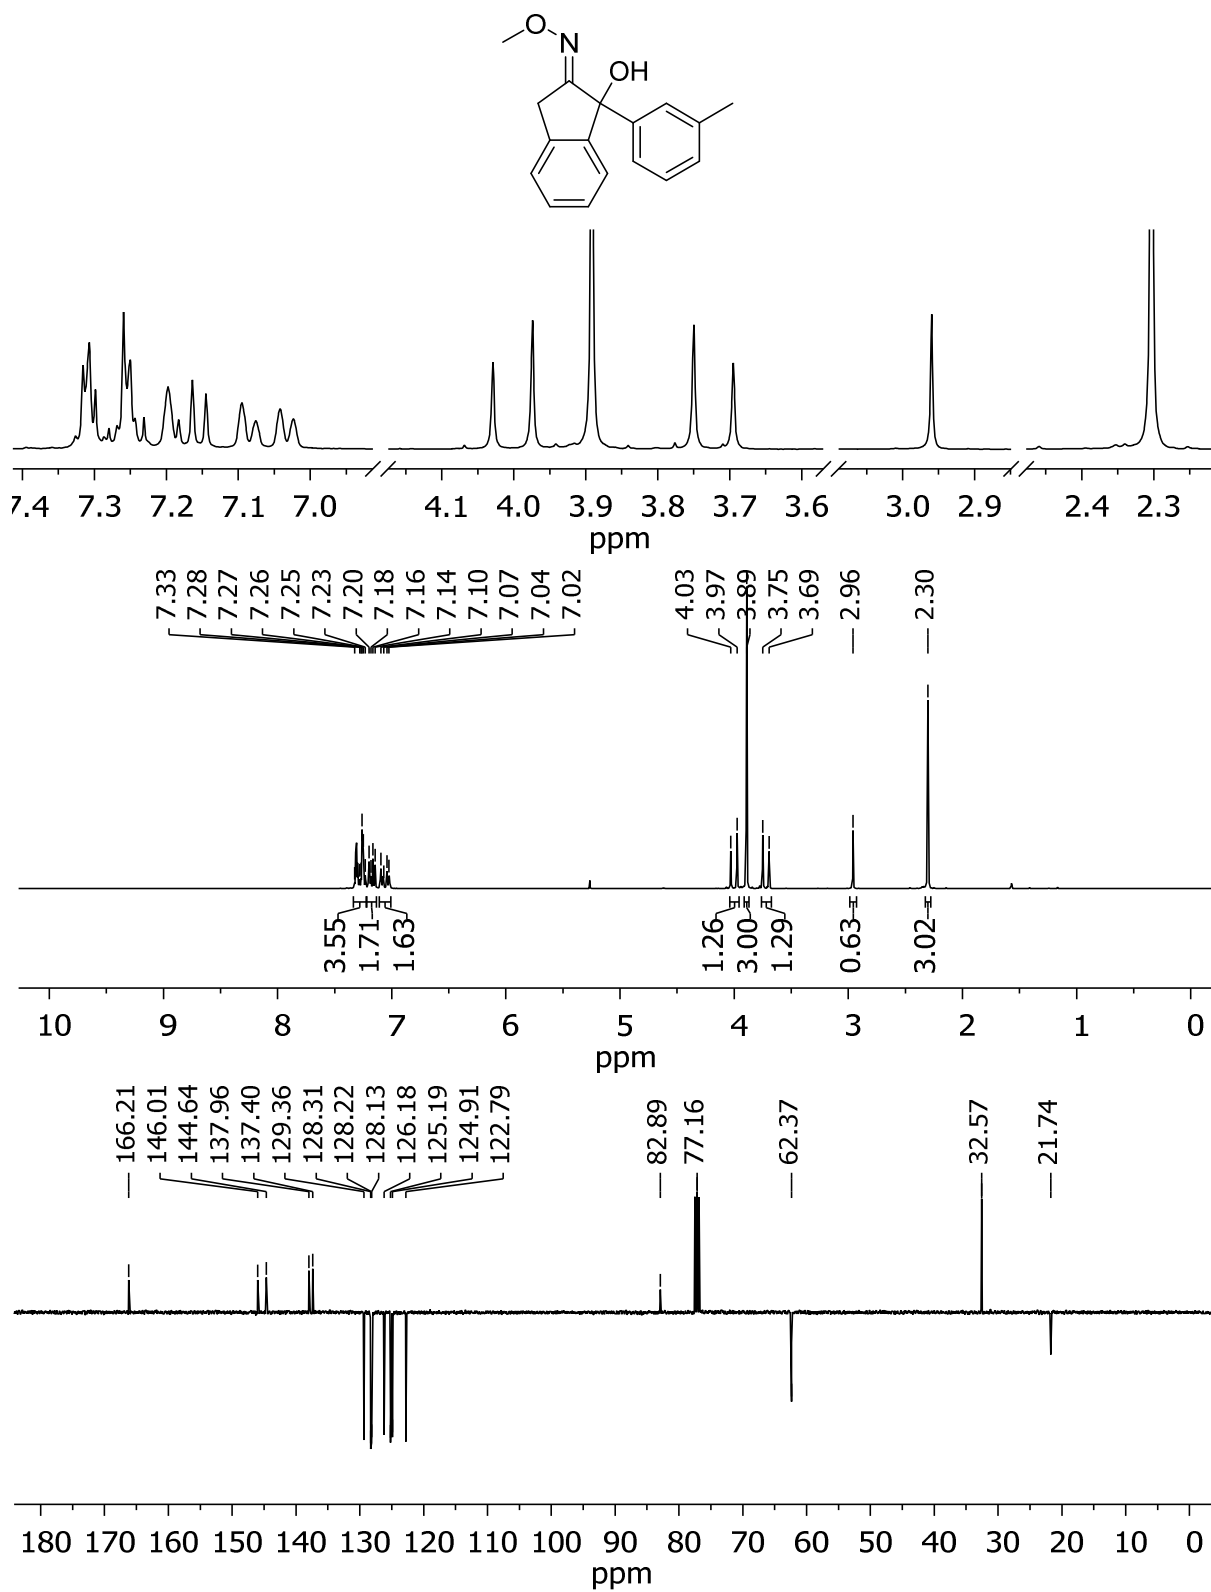

**2-Hydroxy oxime ether 1e** (CDCl<sub>3</sub>, <sup>1</sup>H-NMR: 400 MHz, APT: 100 MHz)

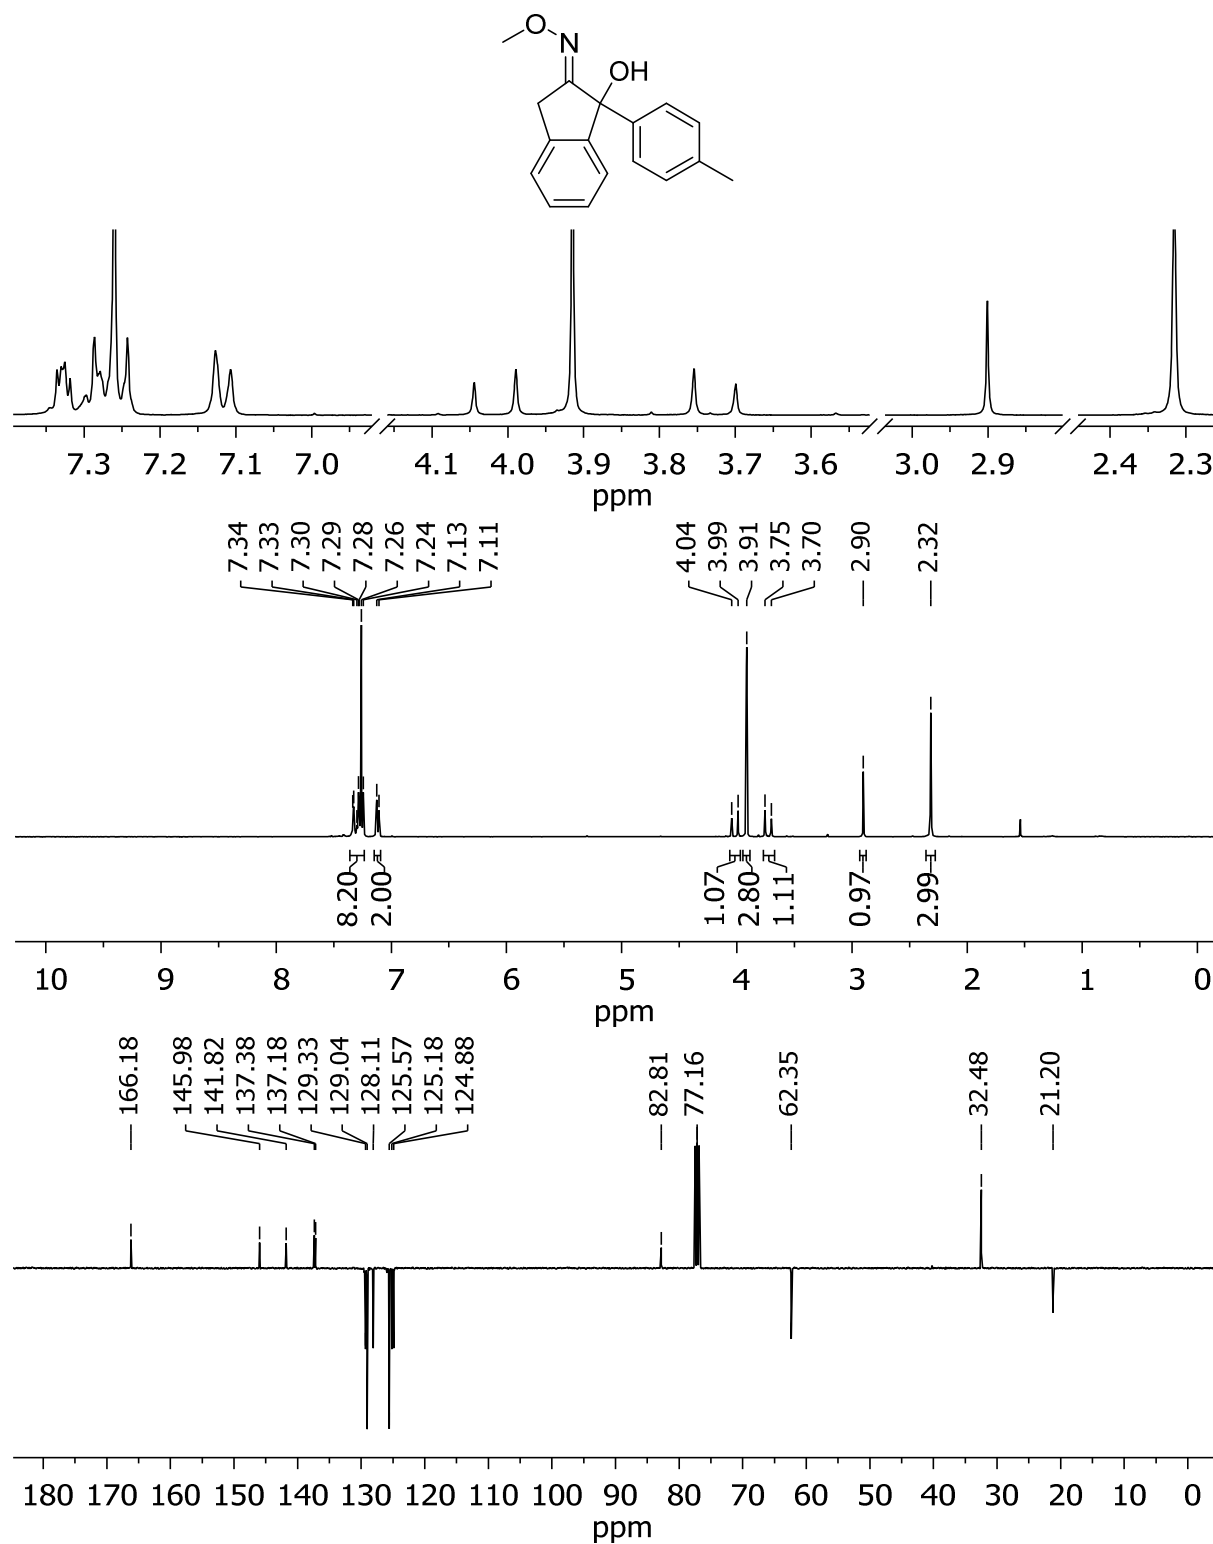



**2-Hydroxy oxime ether 1f** (CDCl<sub>3</sub>, <sup>1</sup>H-NMR: 300 MHz, APT: 75 MHz)

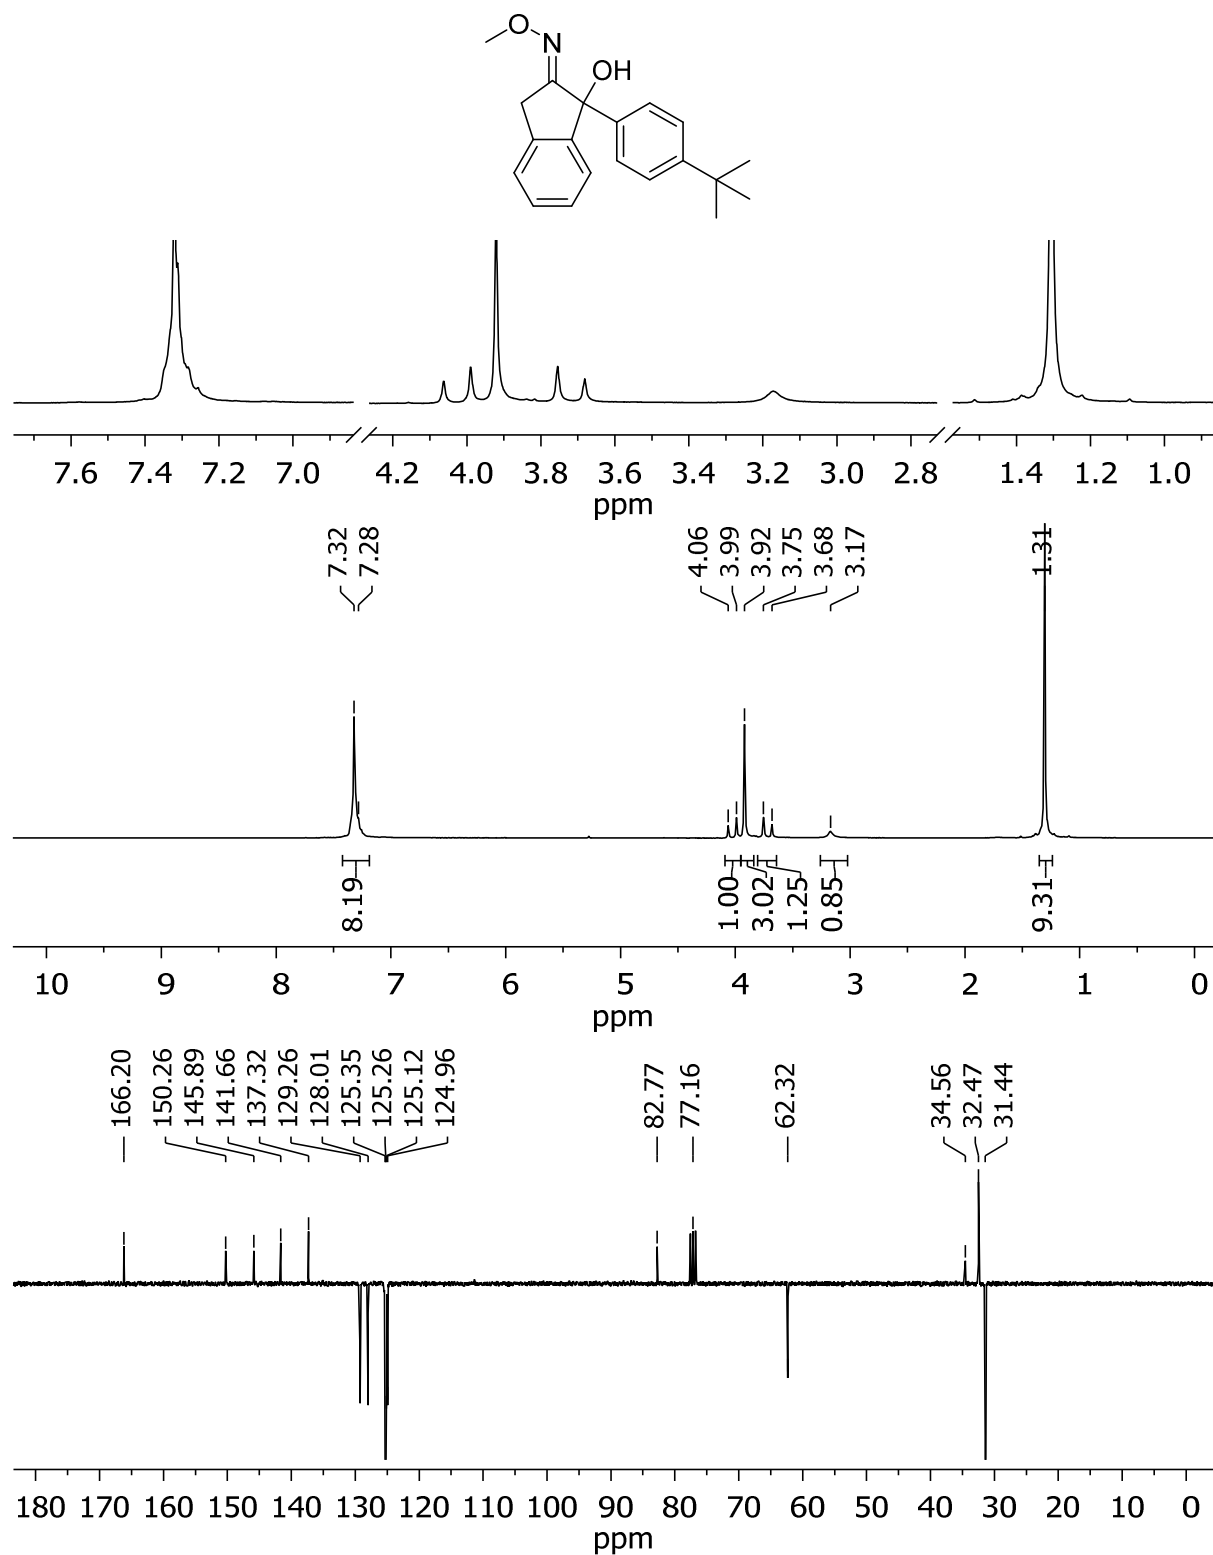

**2-Hydroxy oxime ether 1g** (CDCl<sub>3</sub>, <sup>1</sup>H-NMR: 400 MHz, APT: 100 MHz)

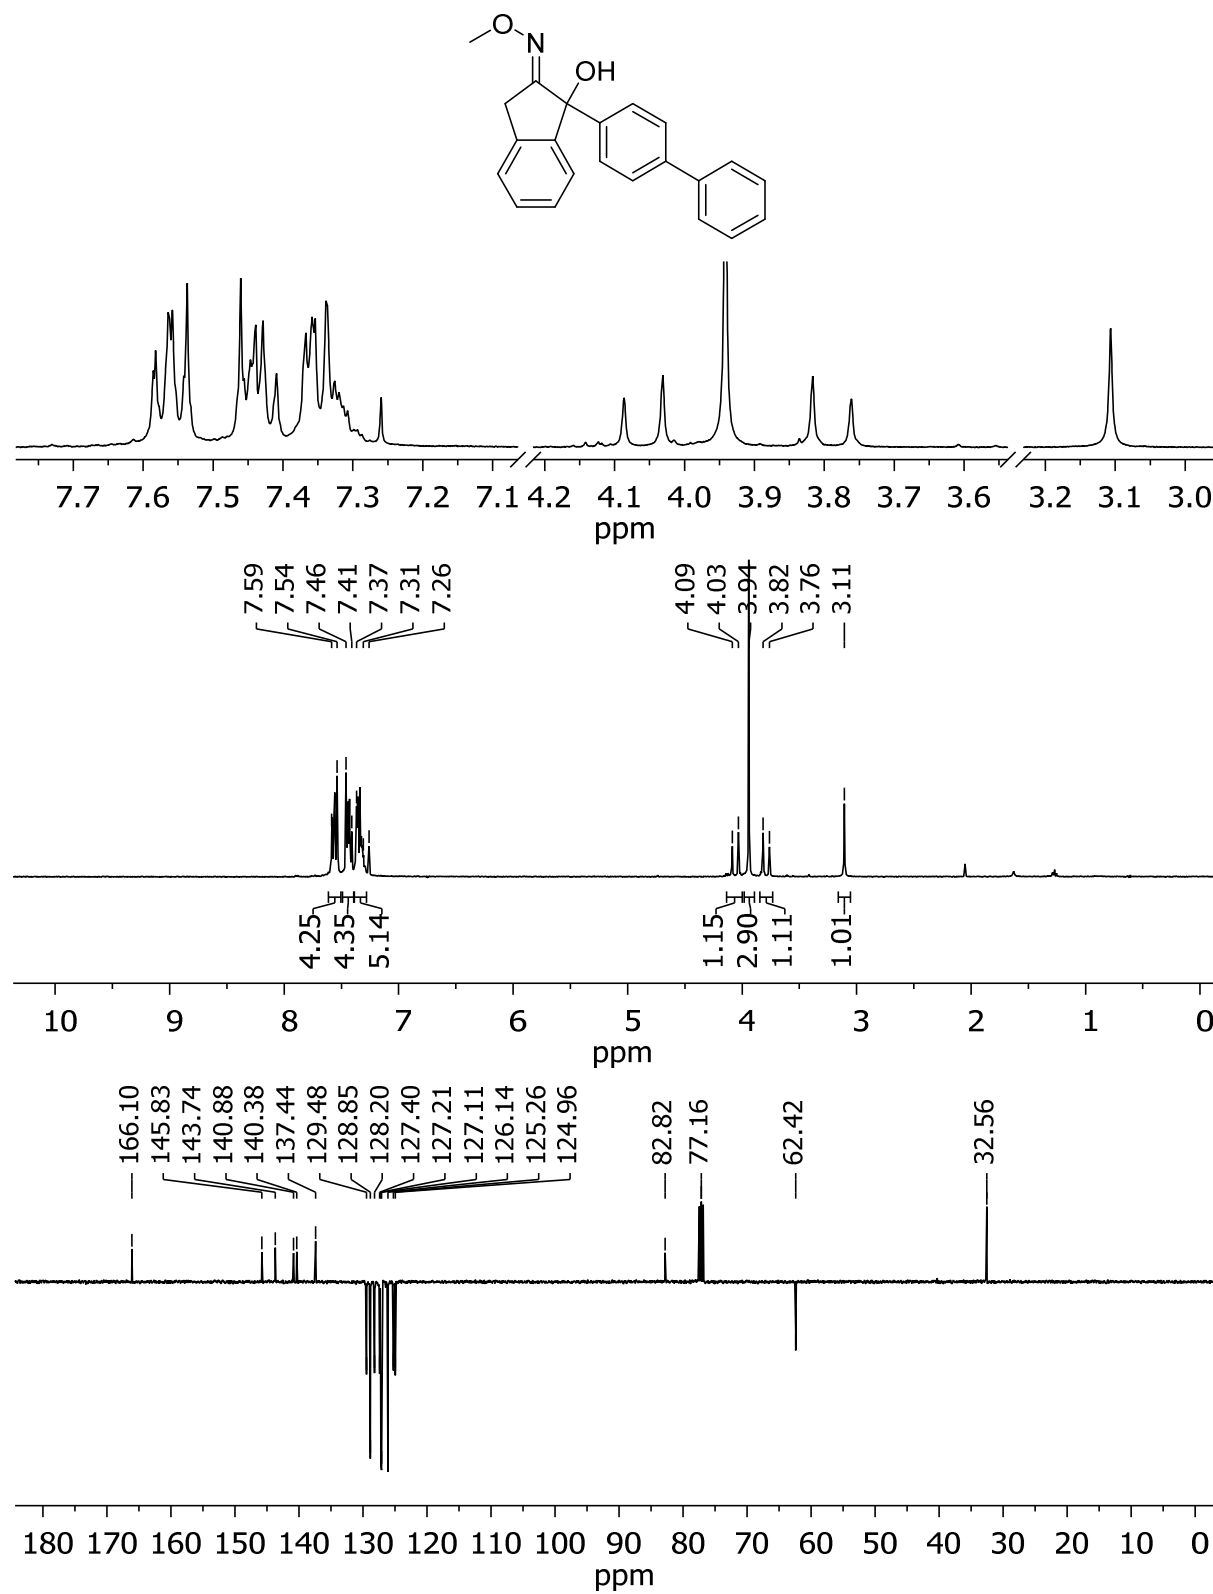

**2-Hydroxy oxime ether 1h** (CDCl<sub>3</sub>, <sup>1</sup>H-NMR: 300 MHz, APT: 75 MHz)

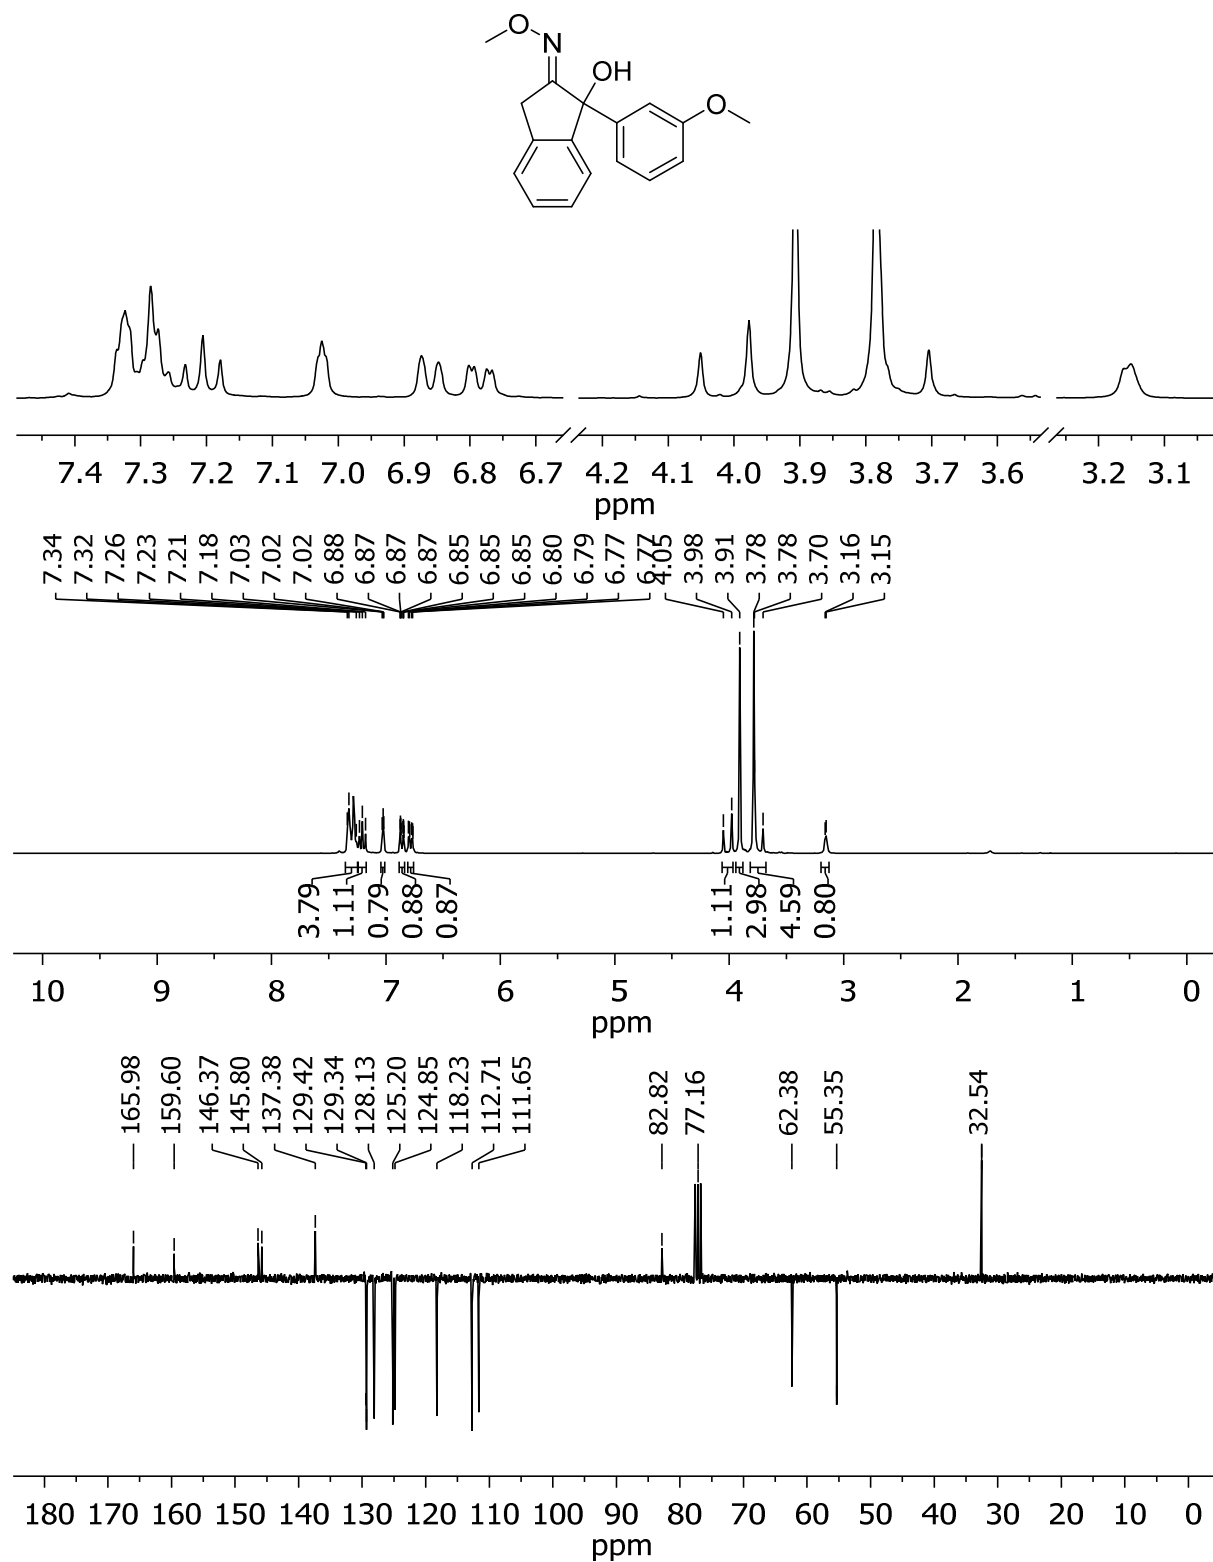

**2-Hydroxy oxime ether 1i** (CDCl<sub>3</sub>, <sup>1</sup>H-NMR: 300 MHz, APT: 75 MHz)

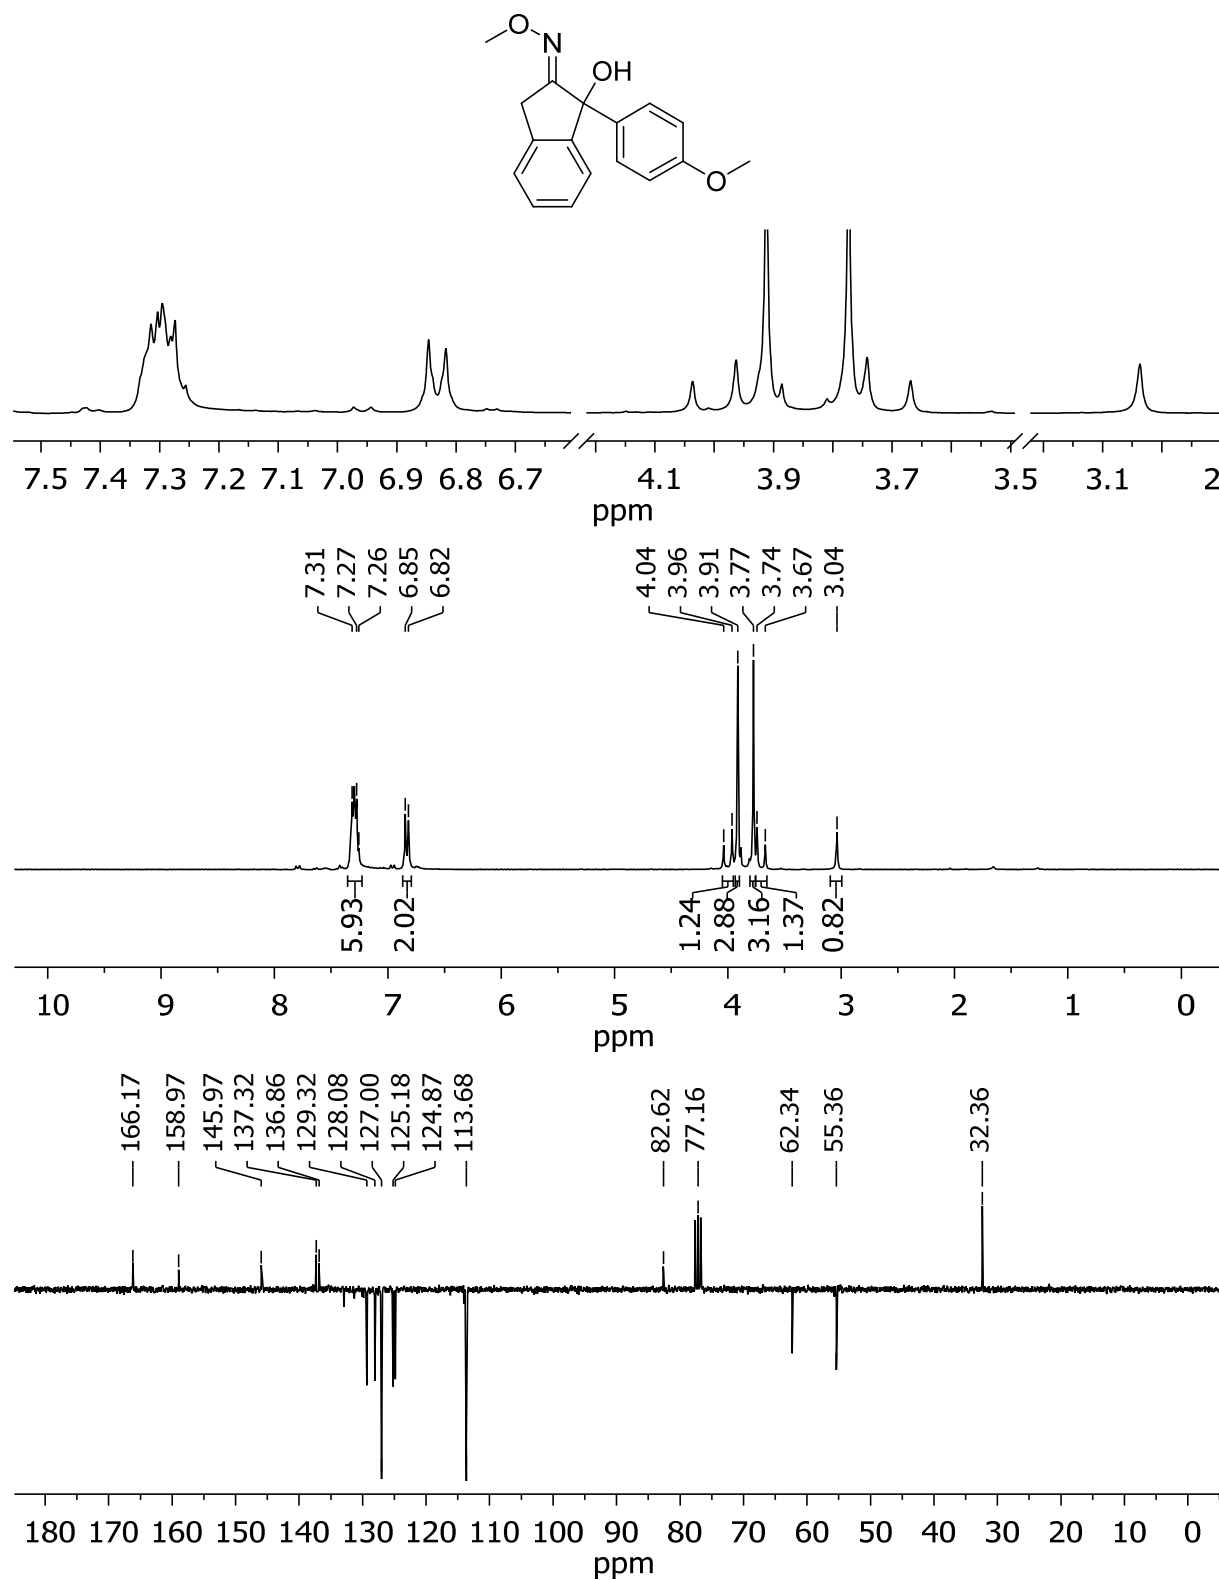

**2-Hydroxy oxime ether 1j** (CDCl<sub>3</sub>, <sup>1</sup>H-NMR: 300 MHz, APT: 75 MHz)

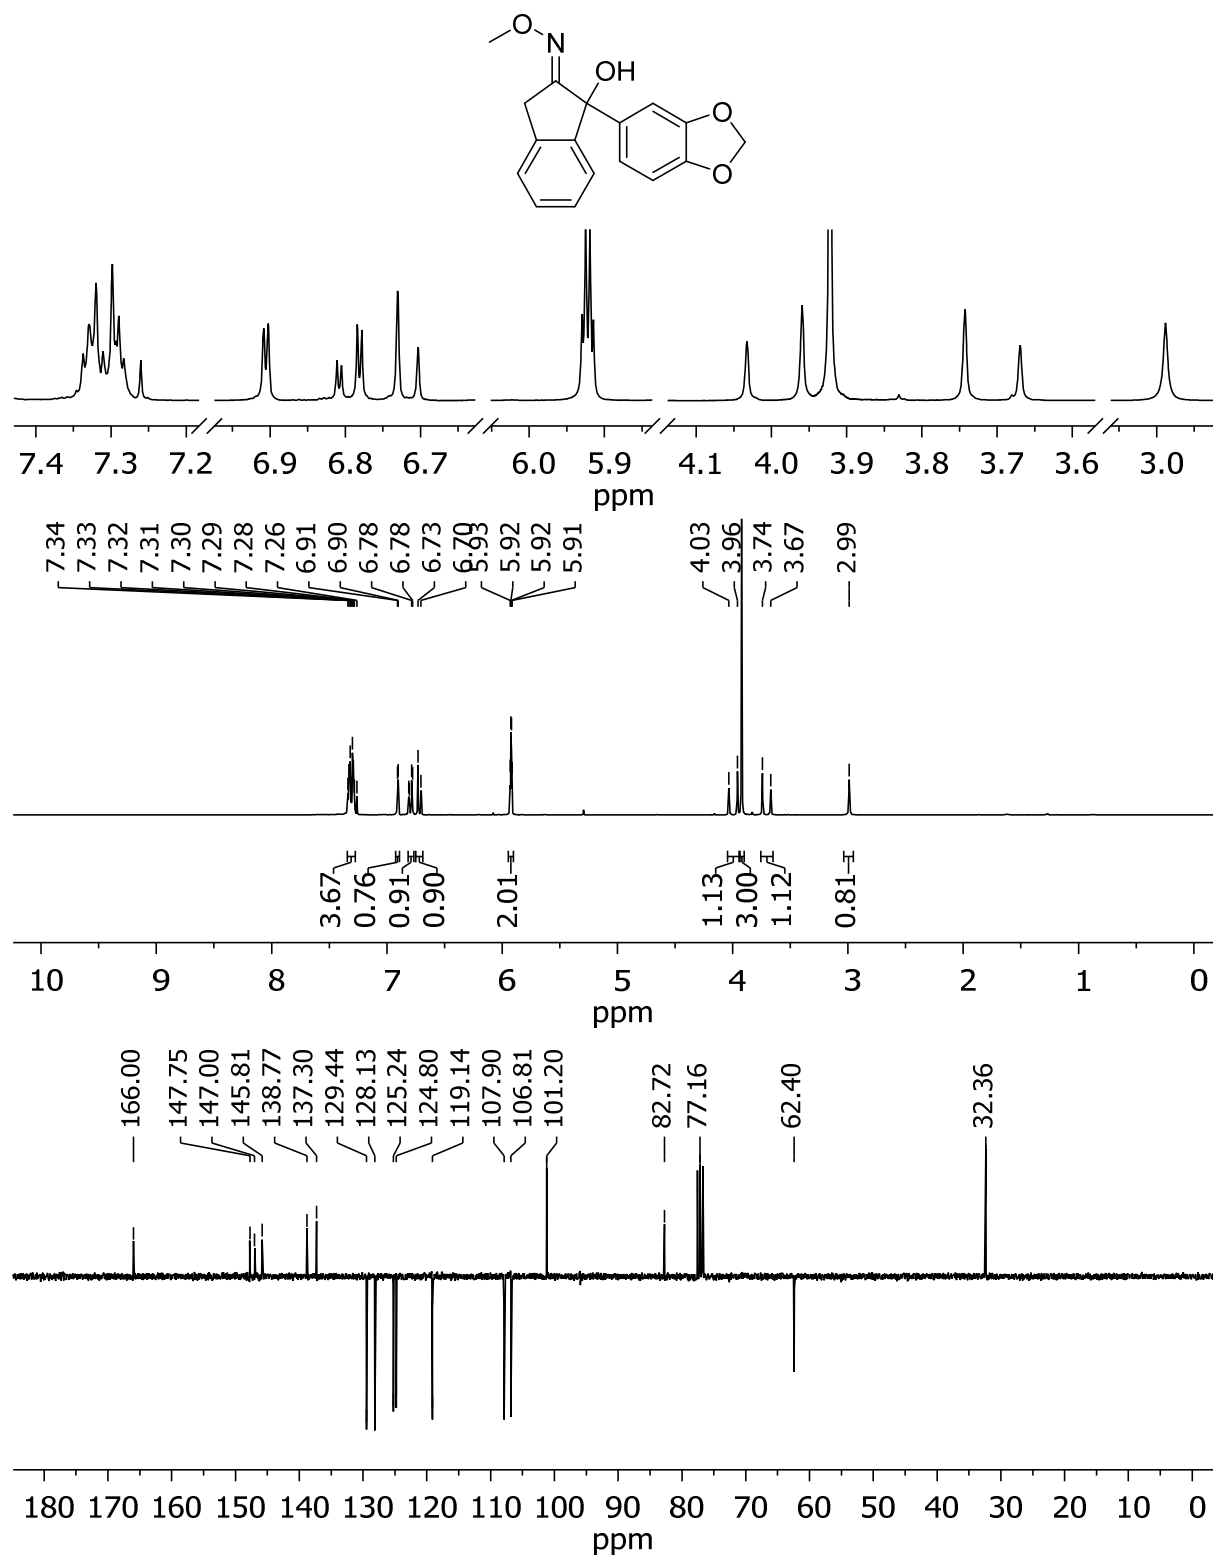

**2-Hydroxy oxime ether 1k** (CDCl<sub>3</sub>, <sup>1</sup>H-NMR: 400 MHz, APT: 100 MHz)

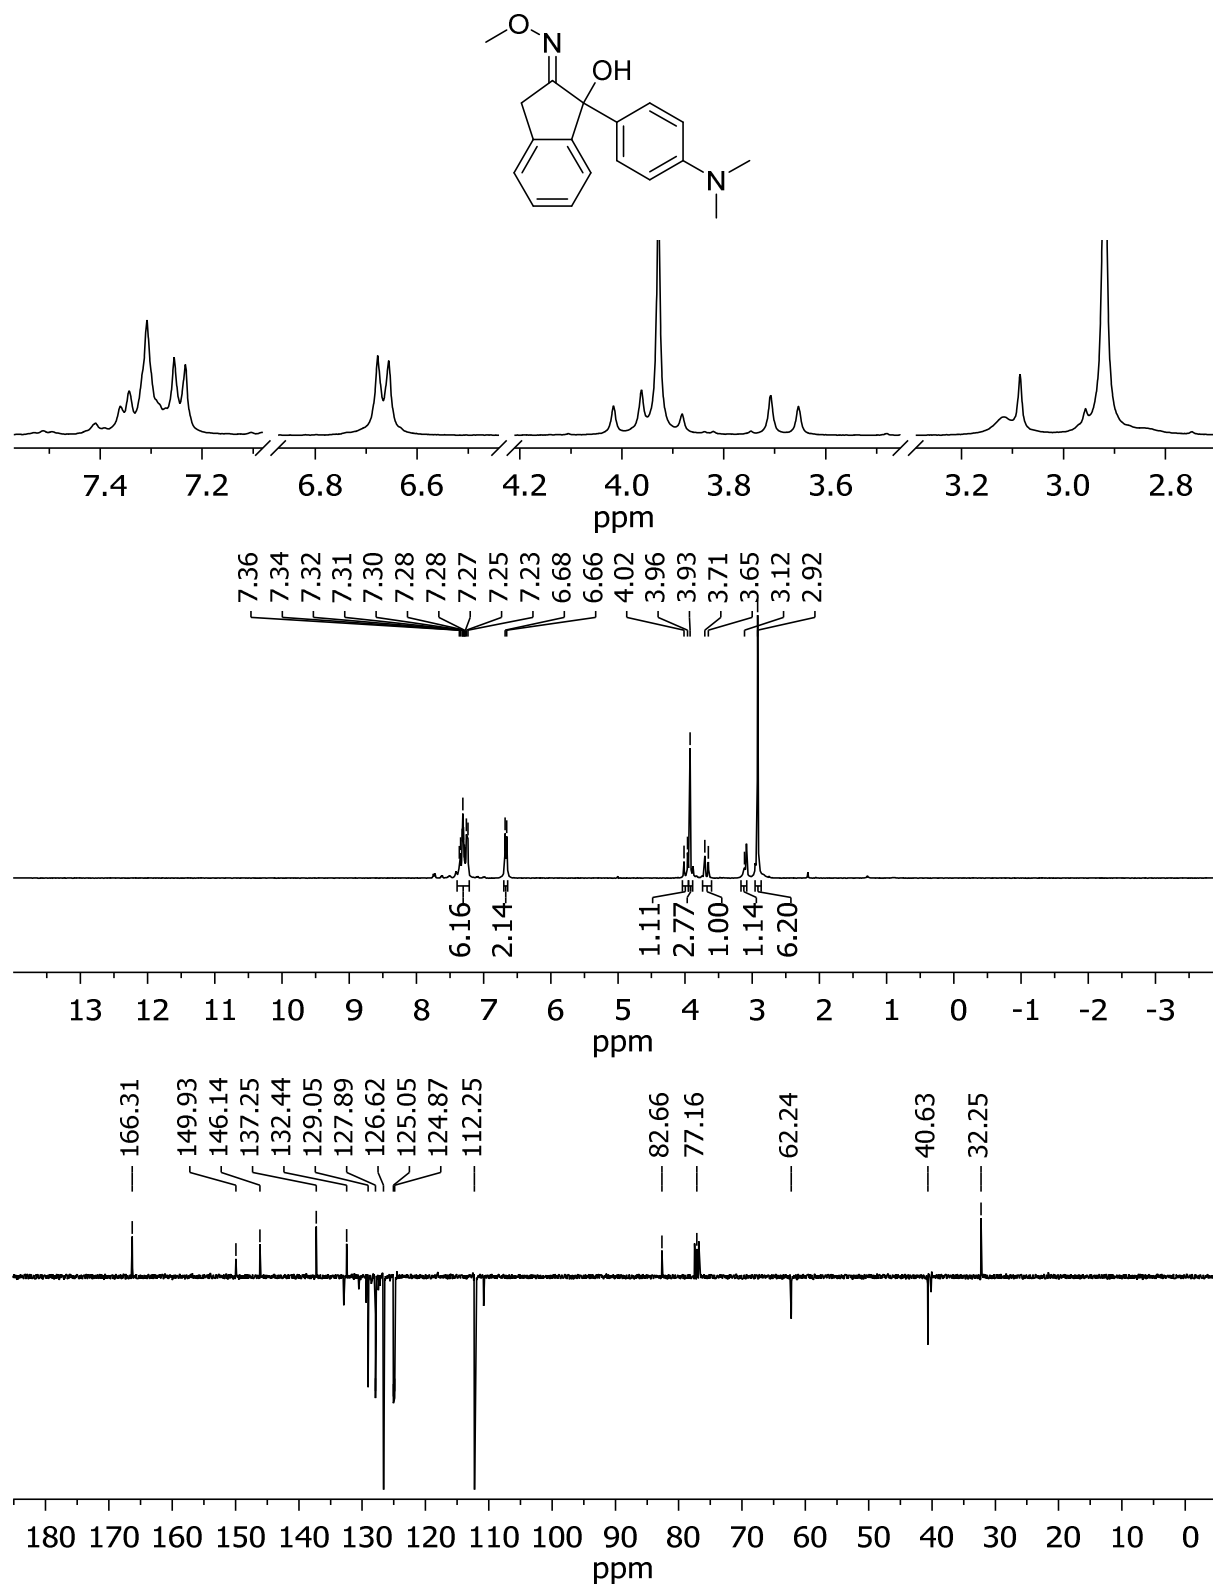

**2-Hydroxy oxime ether 11** (CDCl<sub>3</sub>, <sup>1</sup>H-NMR: 300 MHz, APT: 75 MHz)

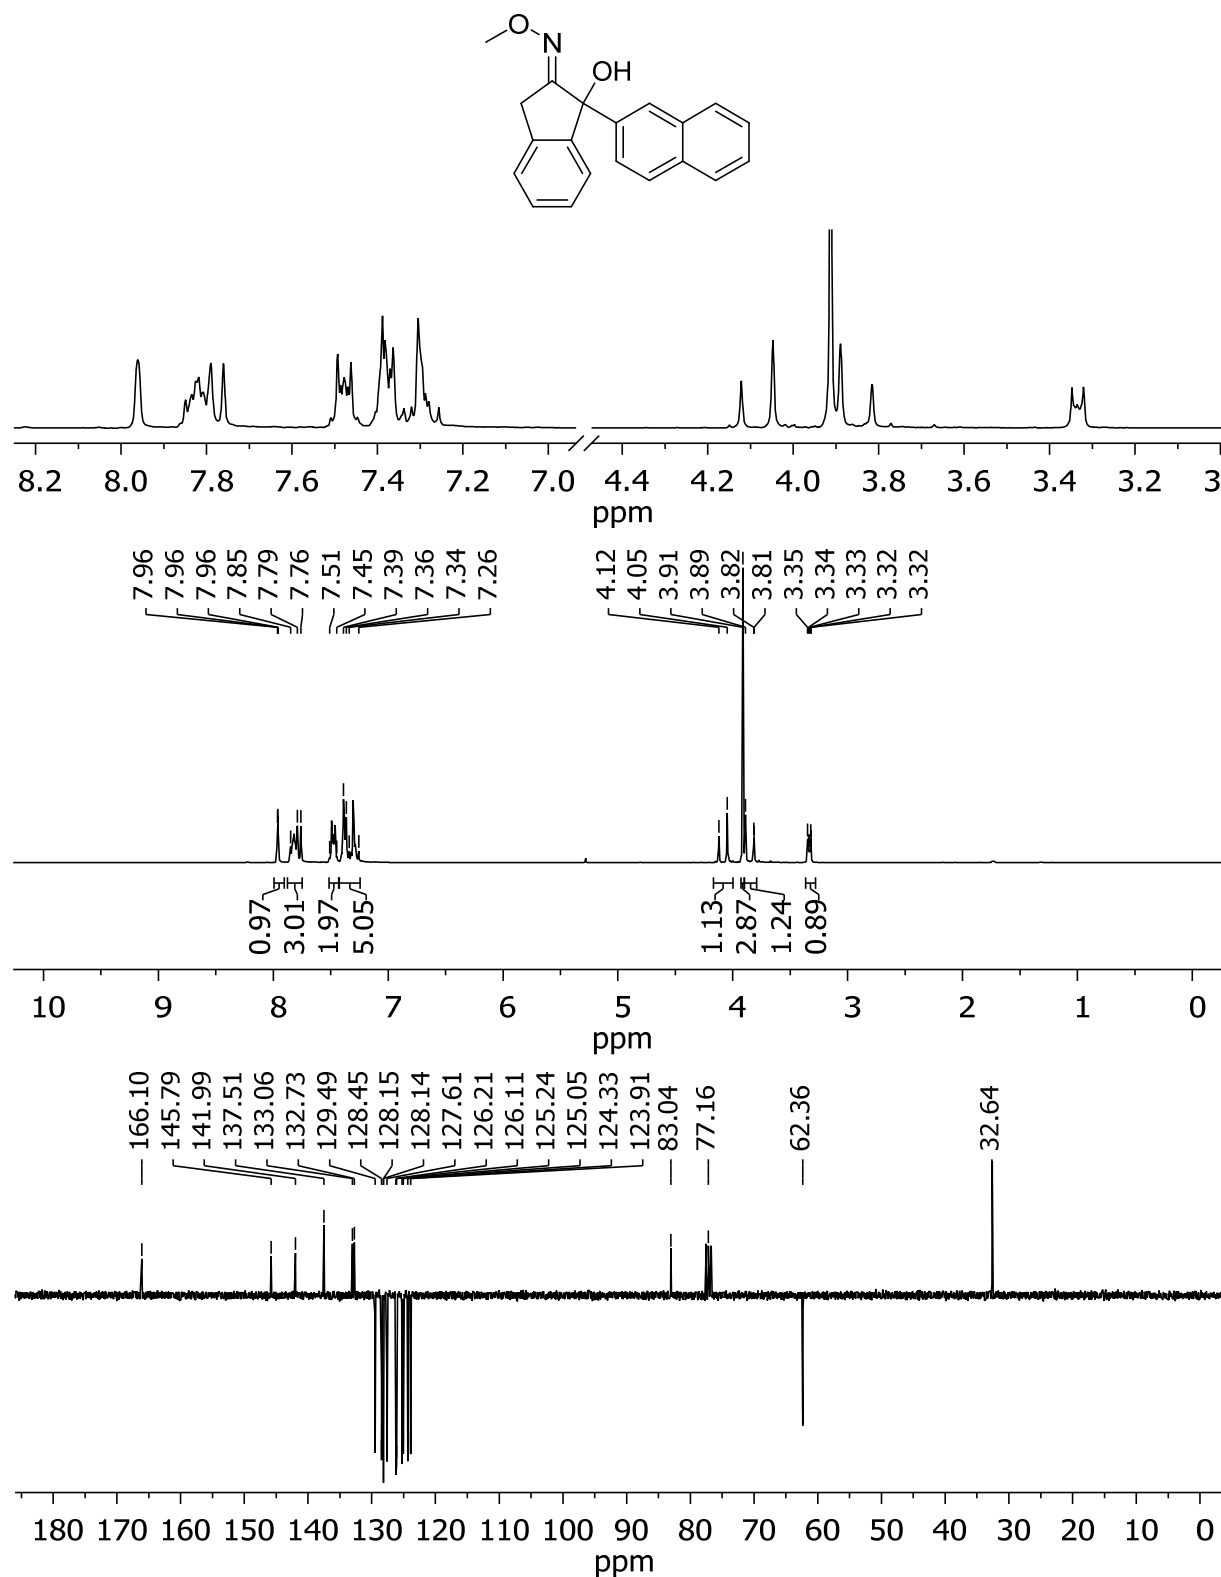

**2-Hydroxy oxime ether 1m** (CDCl<sub>3</sub>, <sup>1</sup>H-NMR: 300 MHz, APT: 100 MHz)

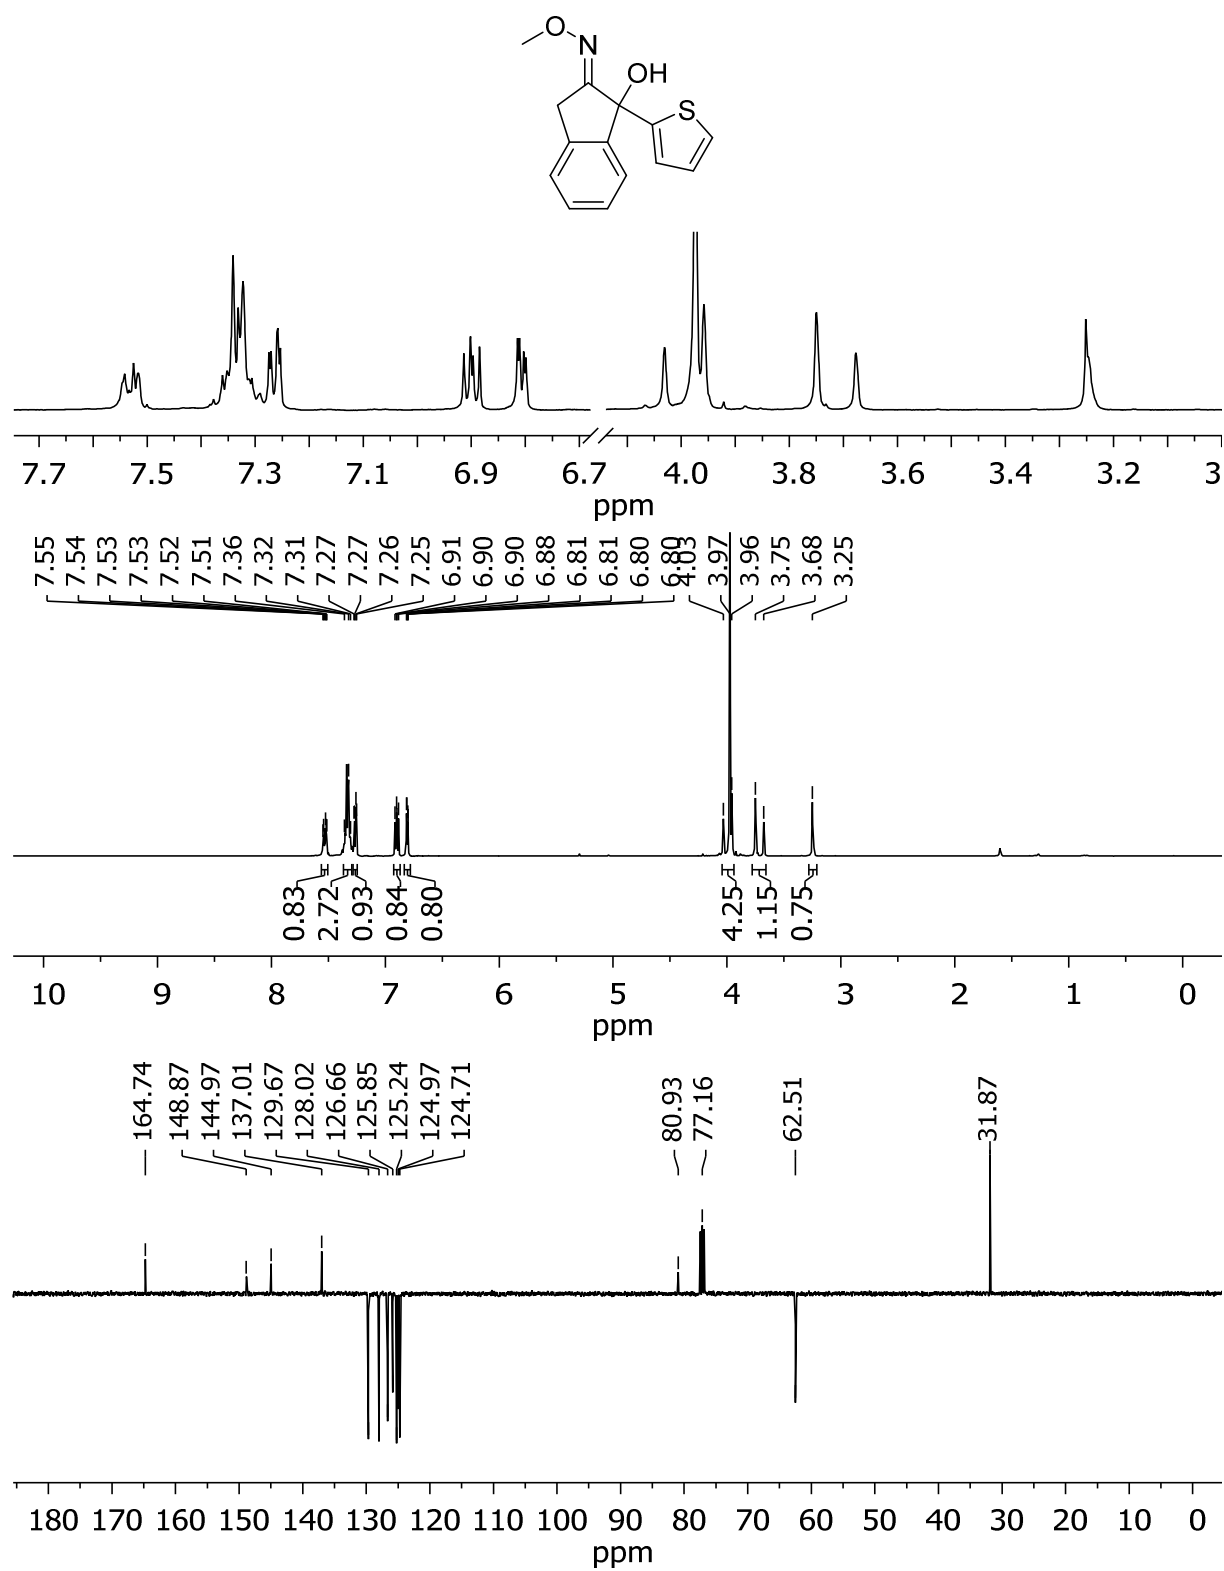



**2-Hydroxy oxime ether 1n** (CDCl<sub>3</sub>, <sup>1</sup>H-NMR: 300 MHz, APT: 75 MHz)

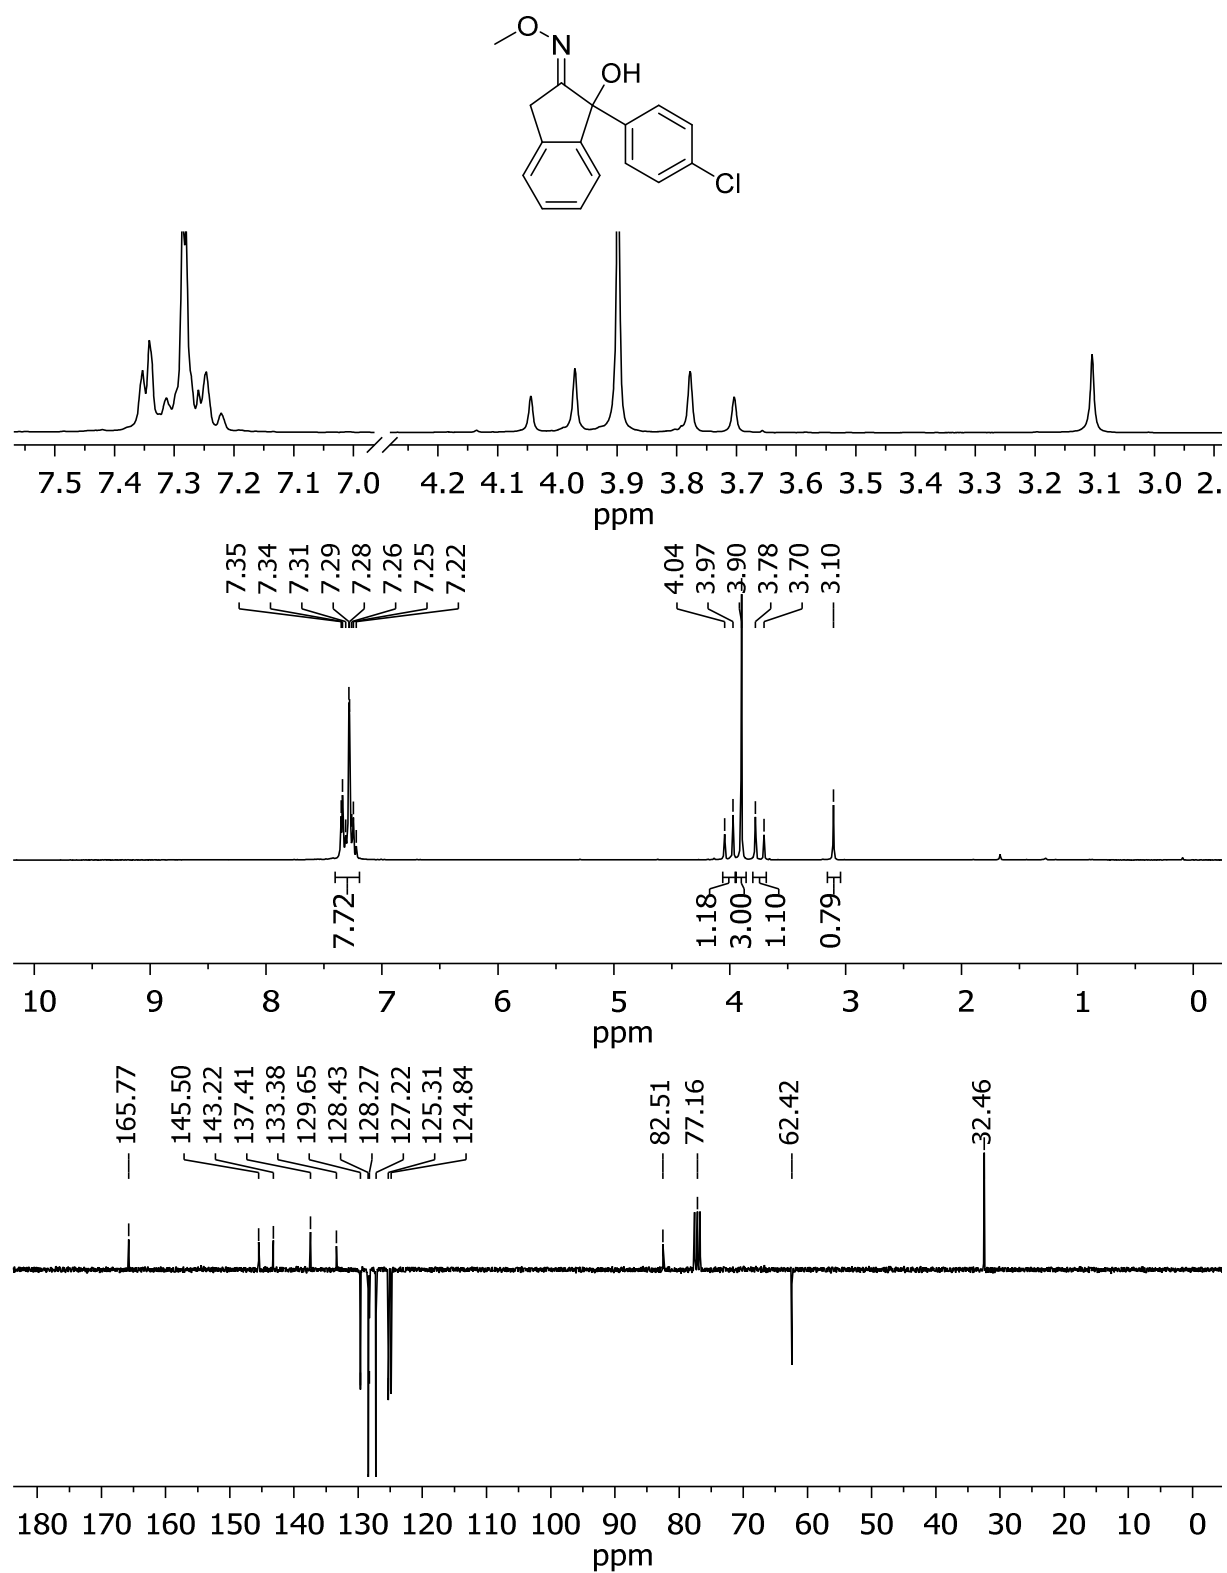

**2-Hydroxy oxime ether 1o** (CDCl<sub>3</sub>, <sup>1</sup>H-NMR: 300 MHz, APT: 75 MHz)

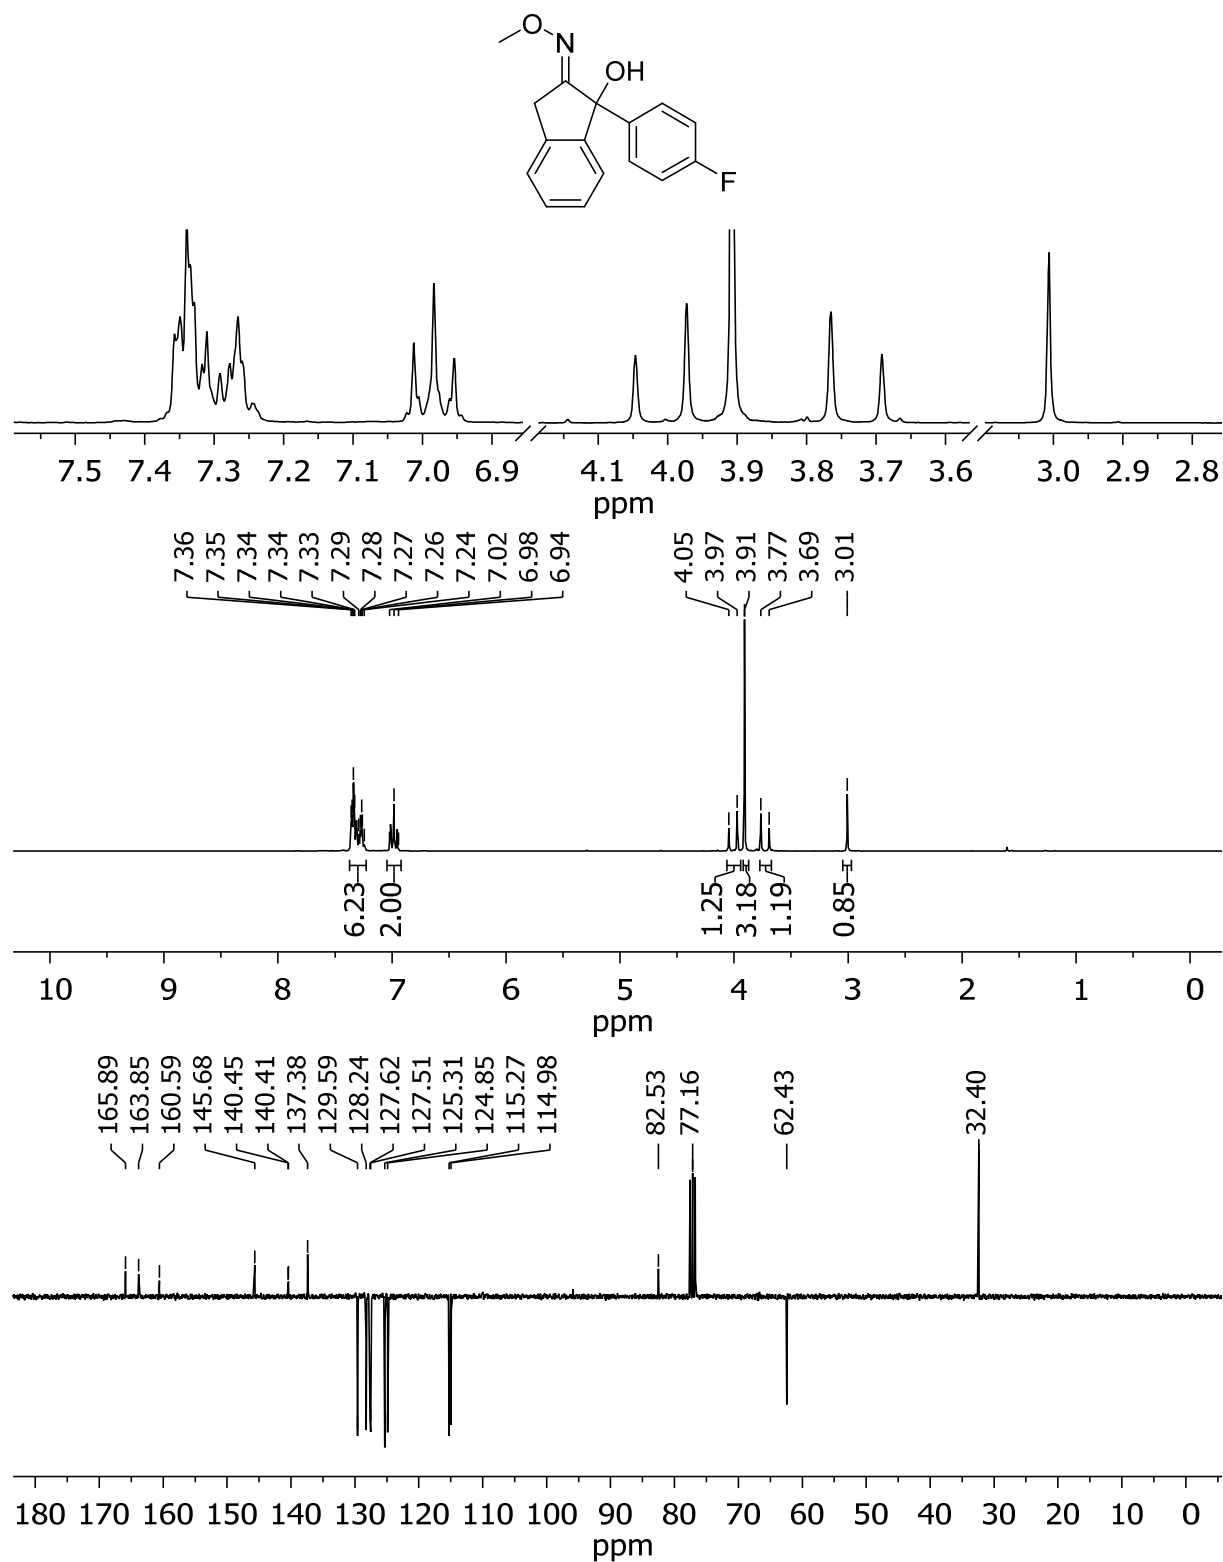

**2-Hydroxy oxime ether 1p** (CDCl<sub>3</sub>, <sup>1</sup>H-NMR: 400 MHz, APT: 100 MHz)

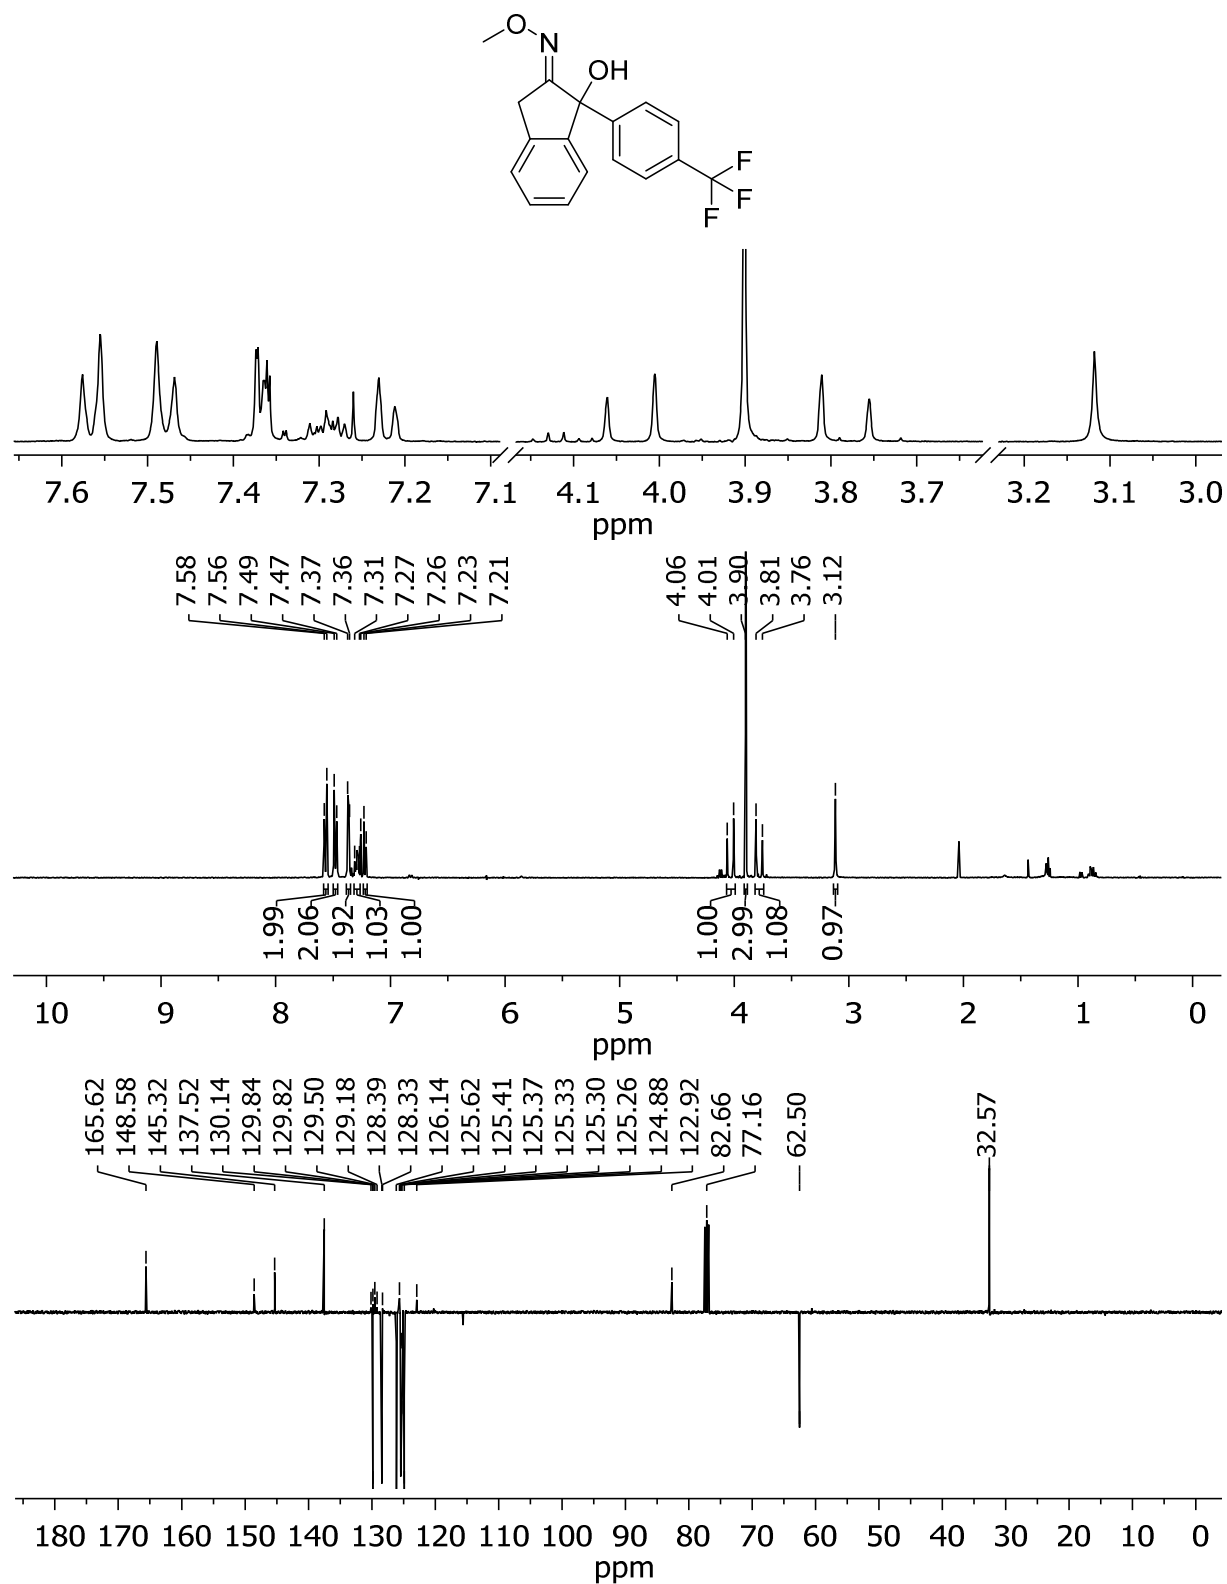

**2-Hydroxy oxime ether 1q** (CDCl<sub>3</sub>, <sup>1</sup>H-NMR: 400 MHz, APT: 100 MHz)

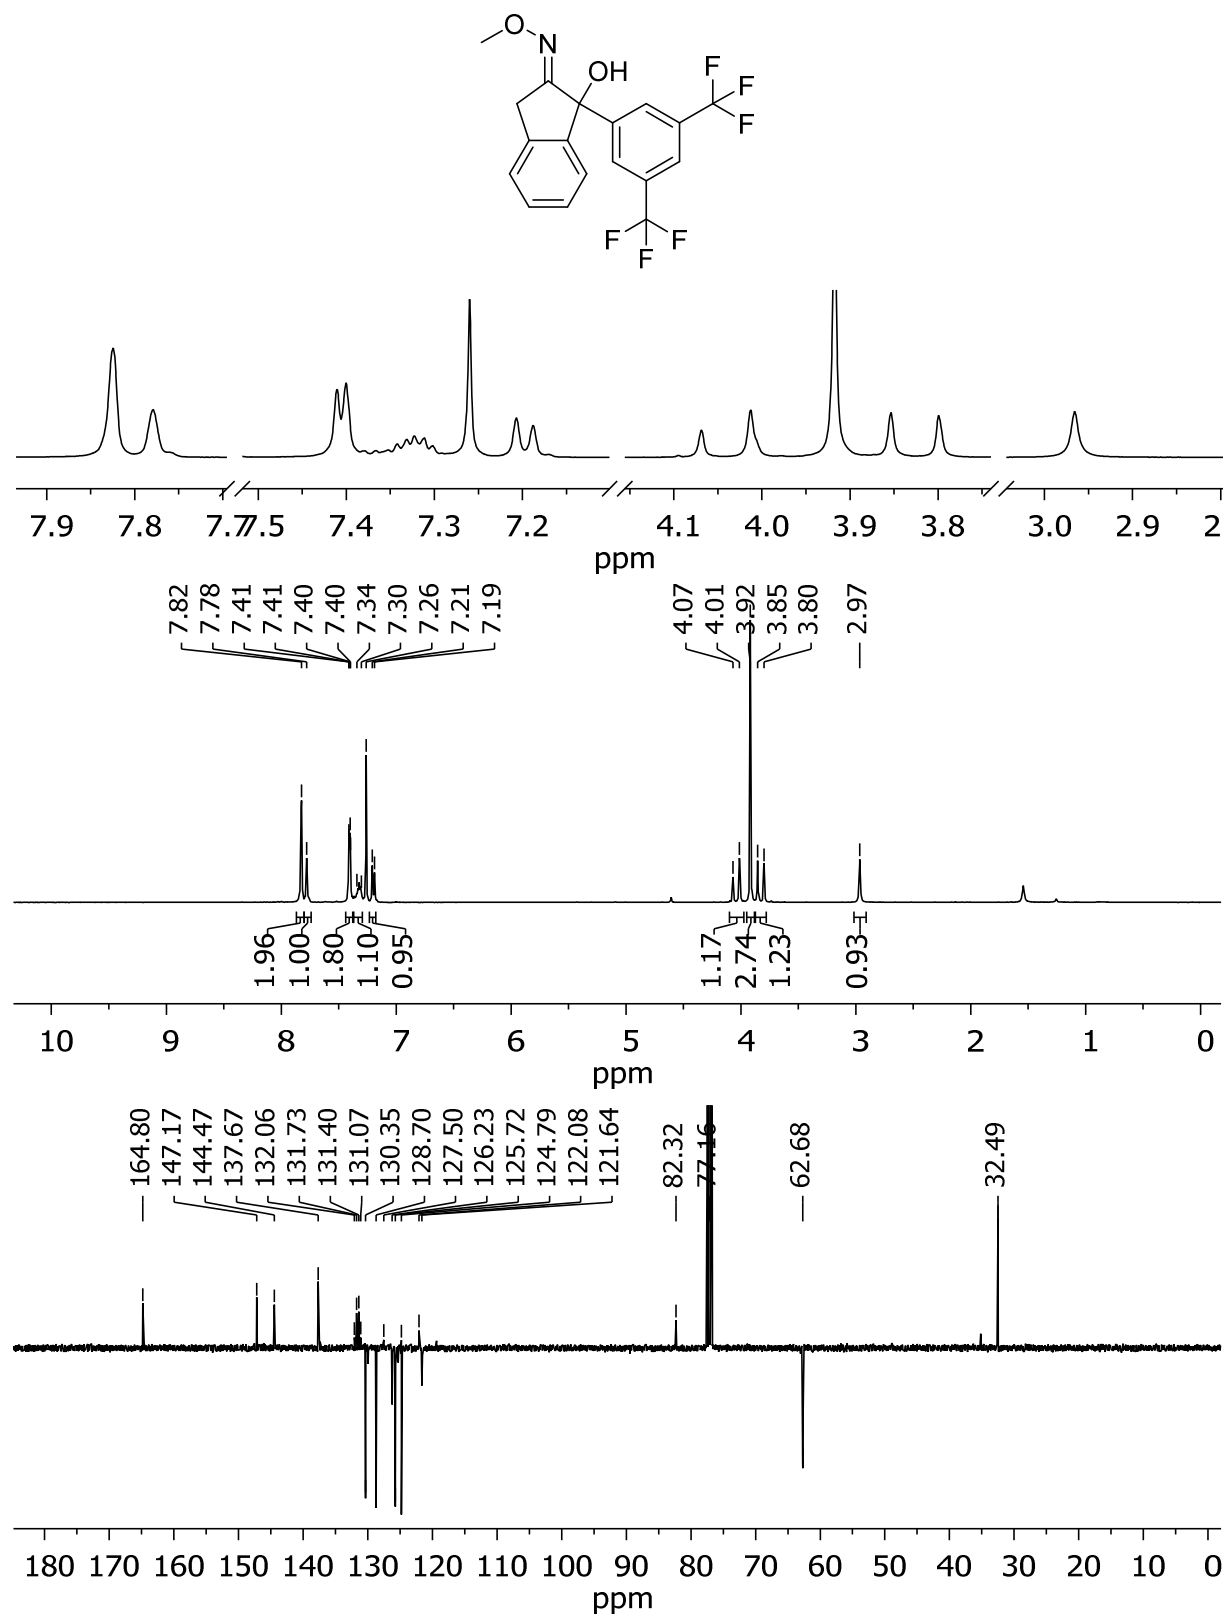

**2-Hydroxy oxime ether 1r** (CDCl<sub>3</sub>, <sup>1</sup>H-NMR: 400 MHz, APT: 100 MHz)

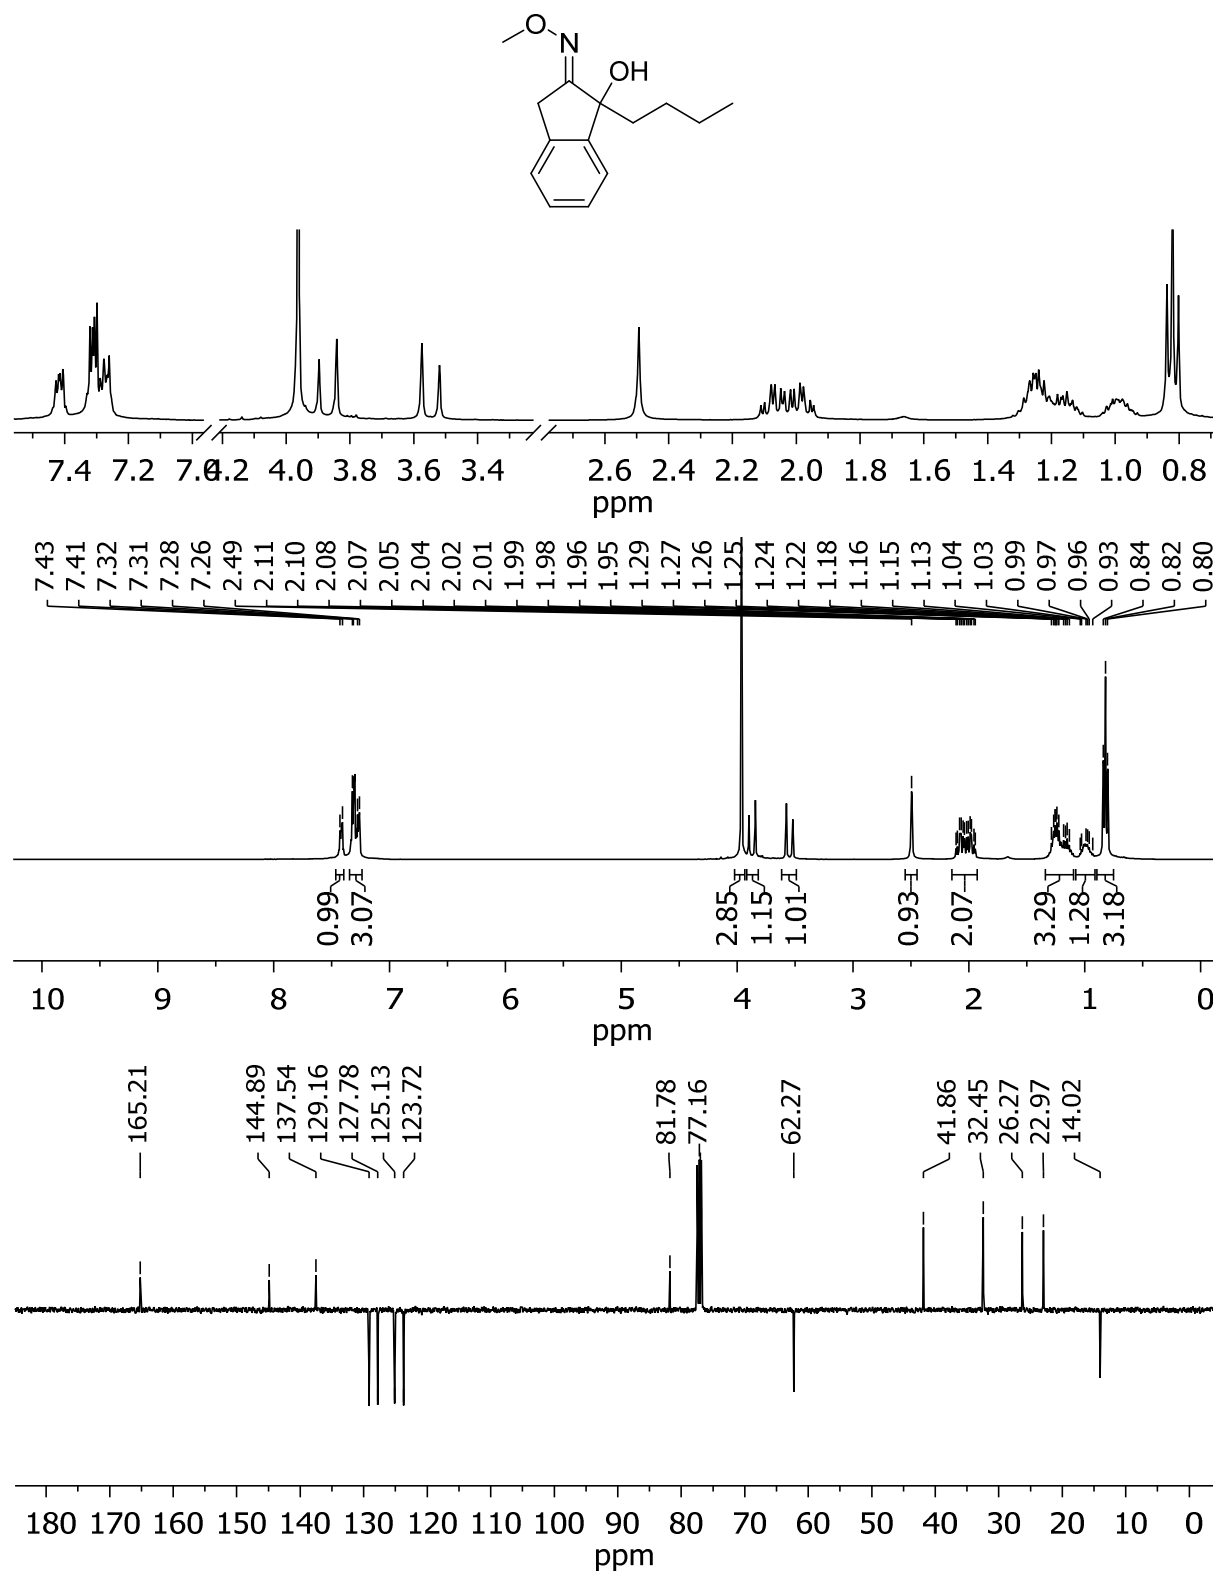

**2-Hydroxy oxime ether 1s** (CDCl<sub>3</sub>, <sup>1</sup>H-NMR: 400 MHz, APT: 100 MHz)

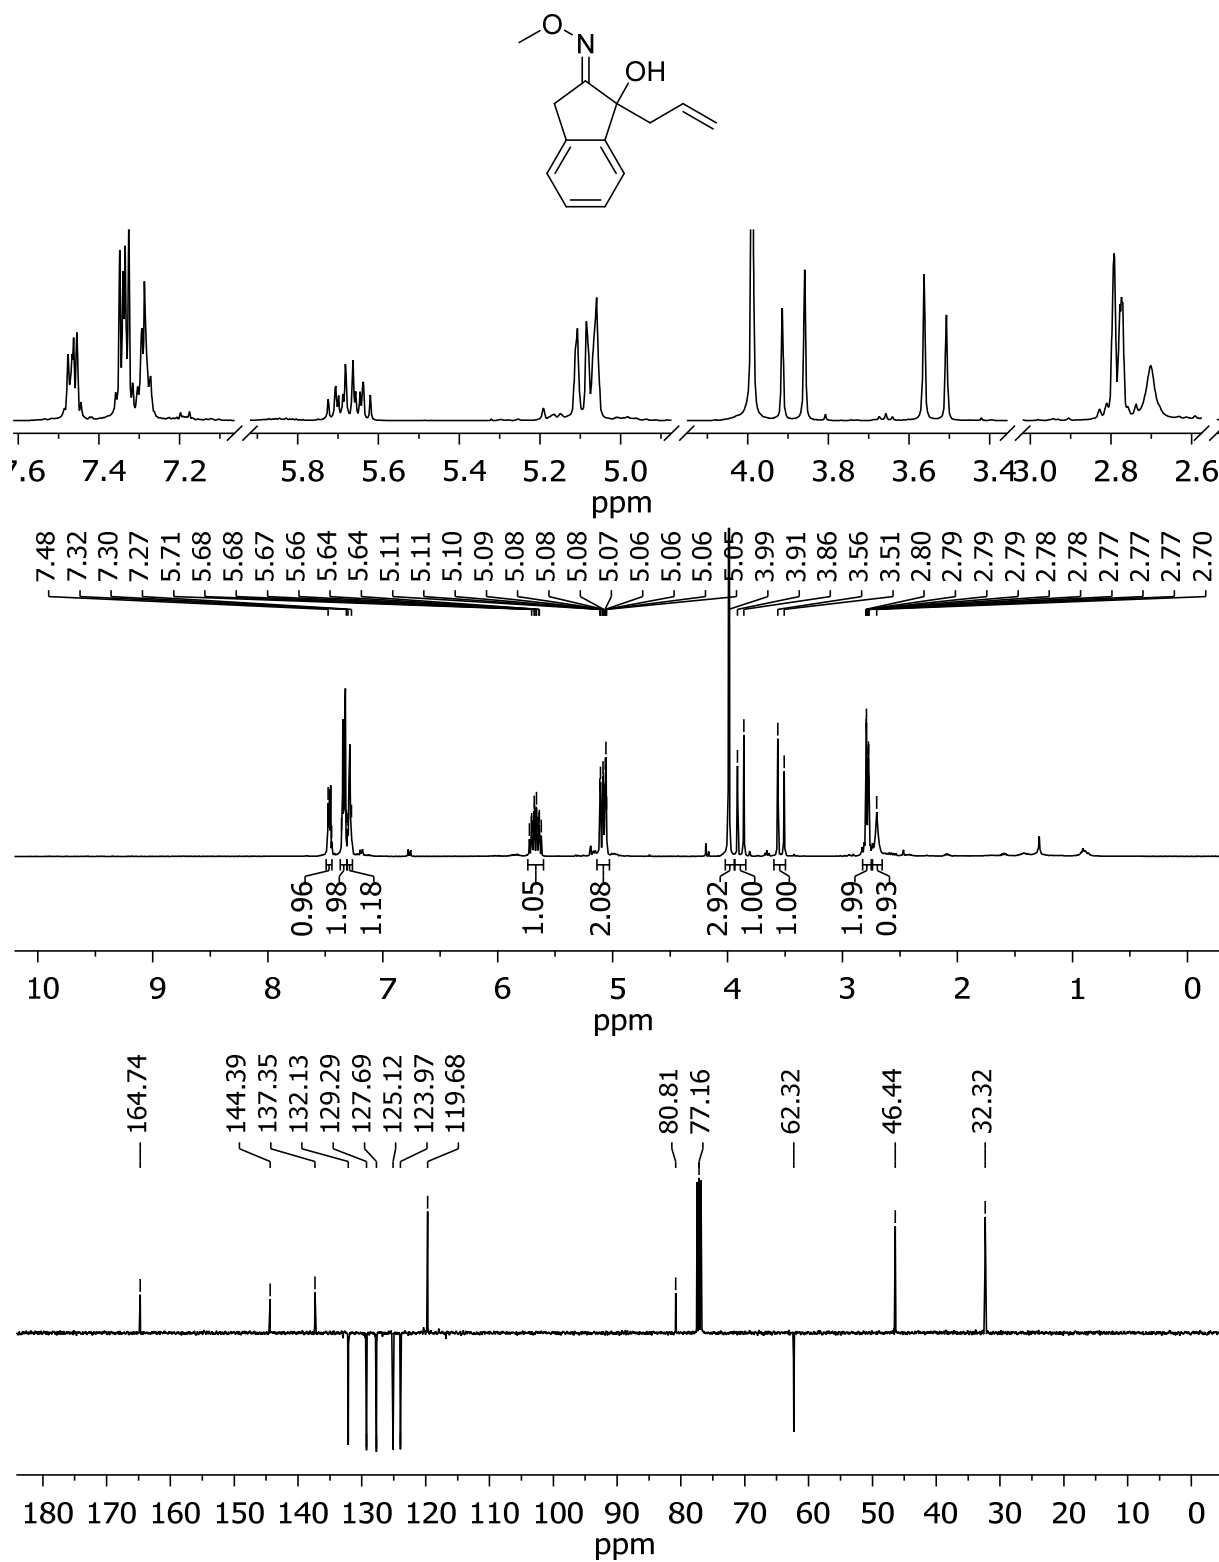

**2-Hydroxy oxime ether 1t** (CDCl<sub>3</sub>, <sup>1</sup>H-NMR: 300 MHz, APT: 75 MHz)

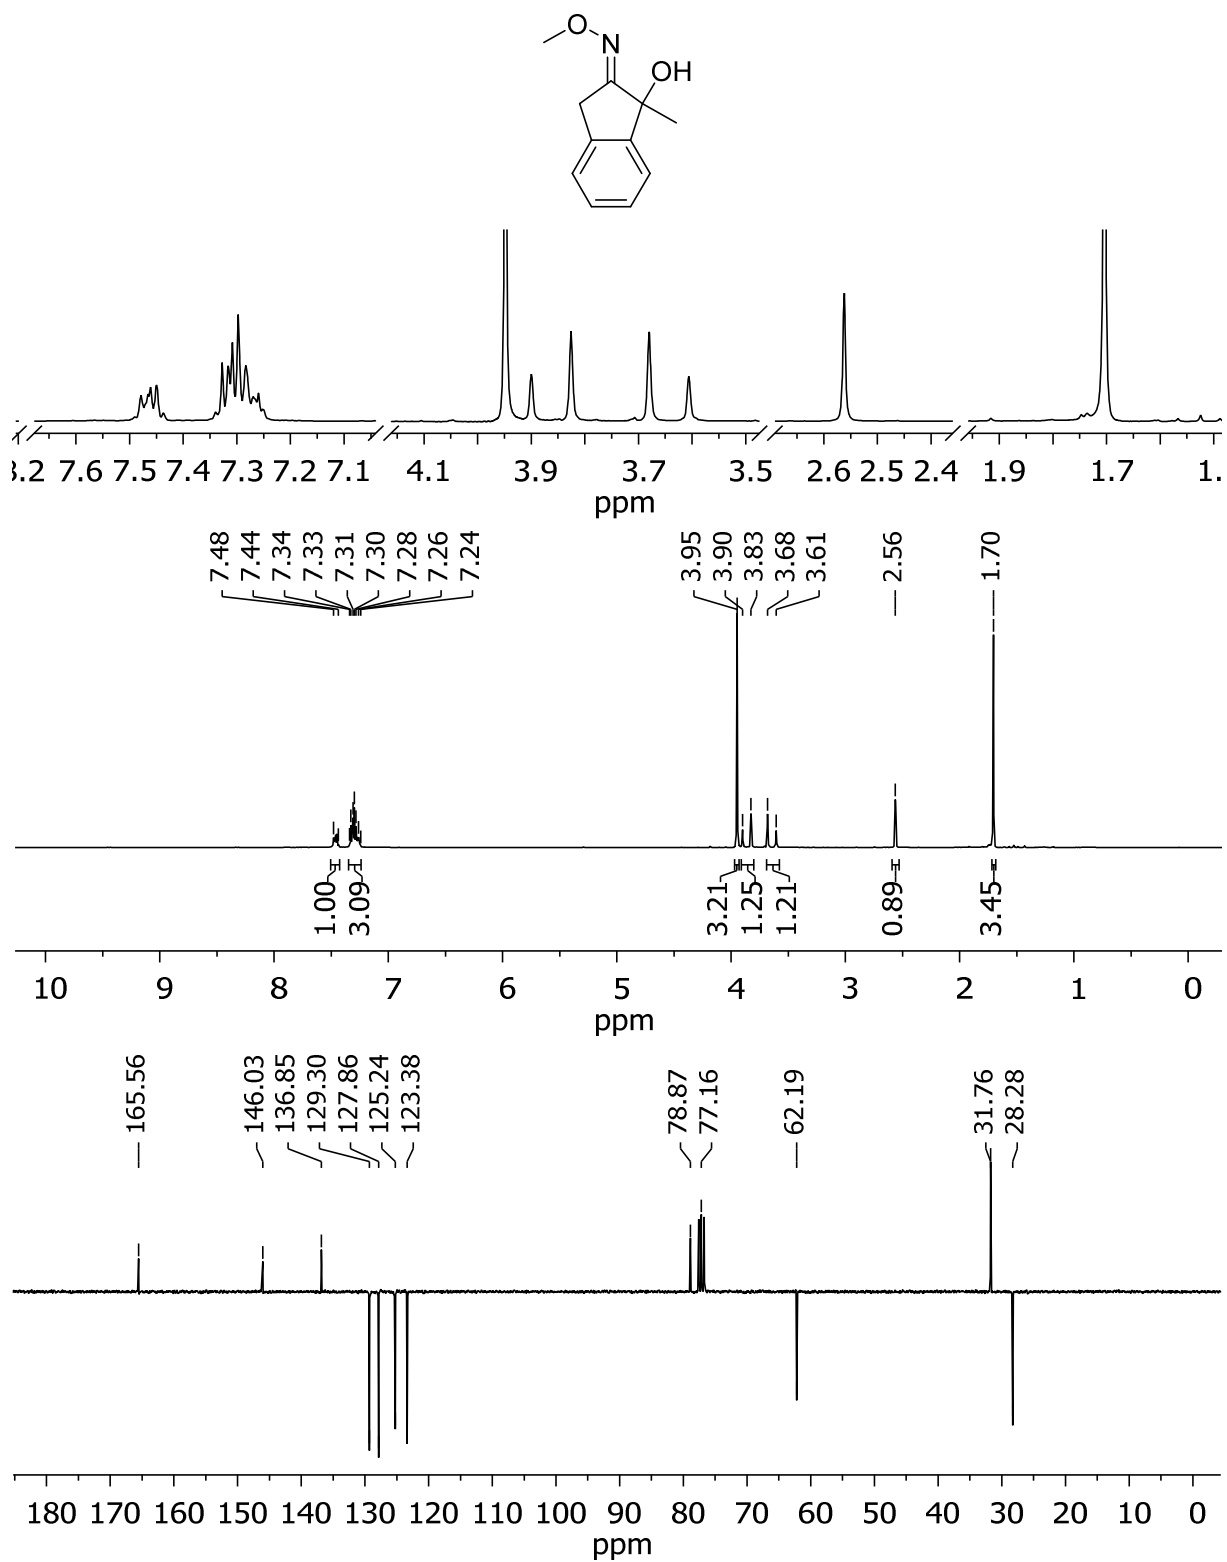

**2-Hydroxy oxime ether 1u** (CDCl<sub>3</sub>, <sup>1</sup>H-NMR: 300 MHz, APT: 75 MHz)

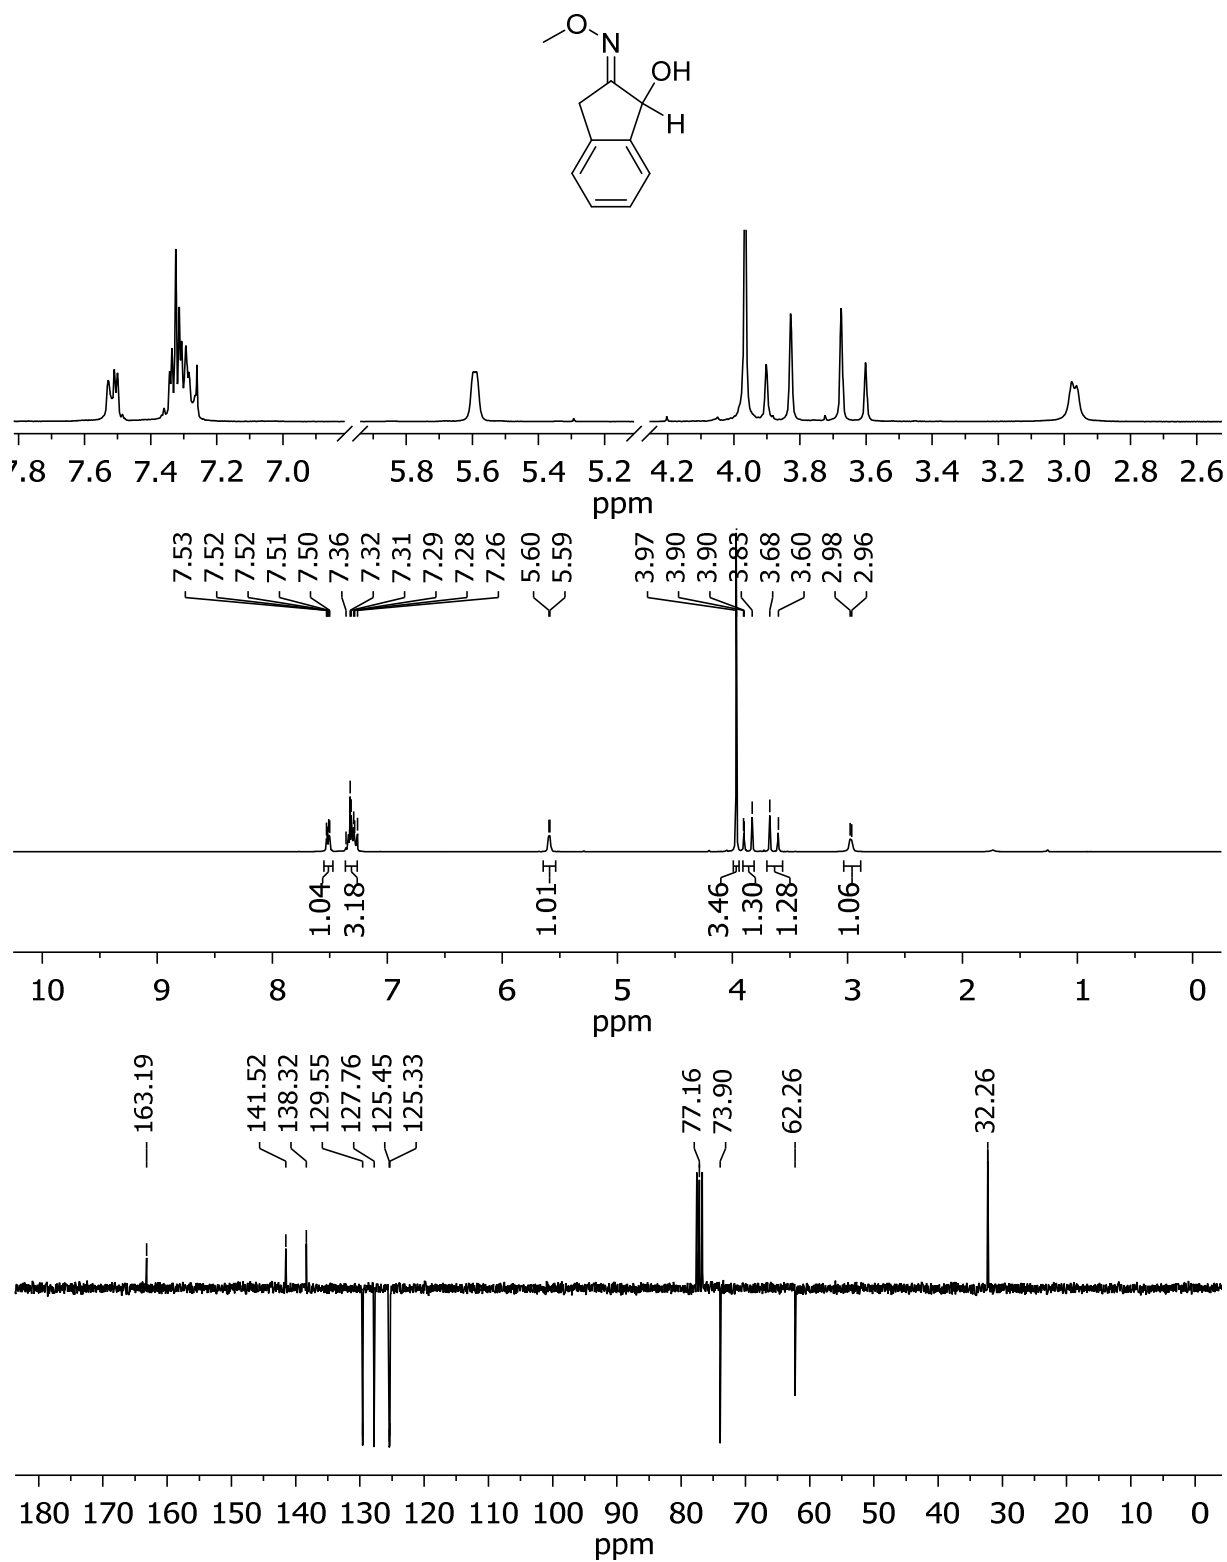



**2-(Hydroxyimino)-1-tetralone S5** (DMSO-d<sub>6</sub>, <sup>1</sup>H-NMR: 400 MHz, APT: 100 MHz)

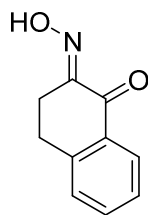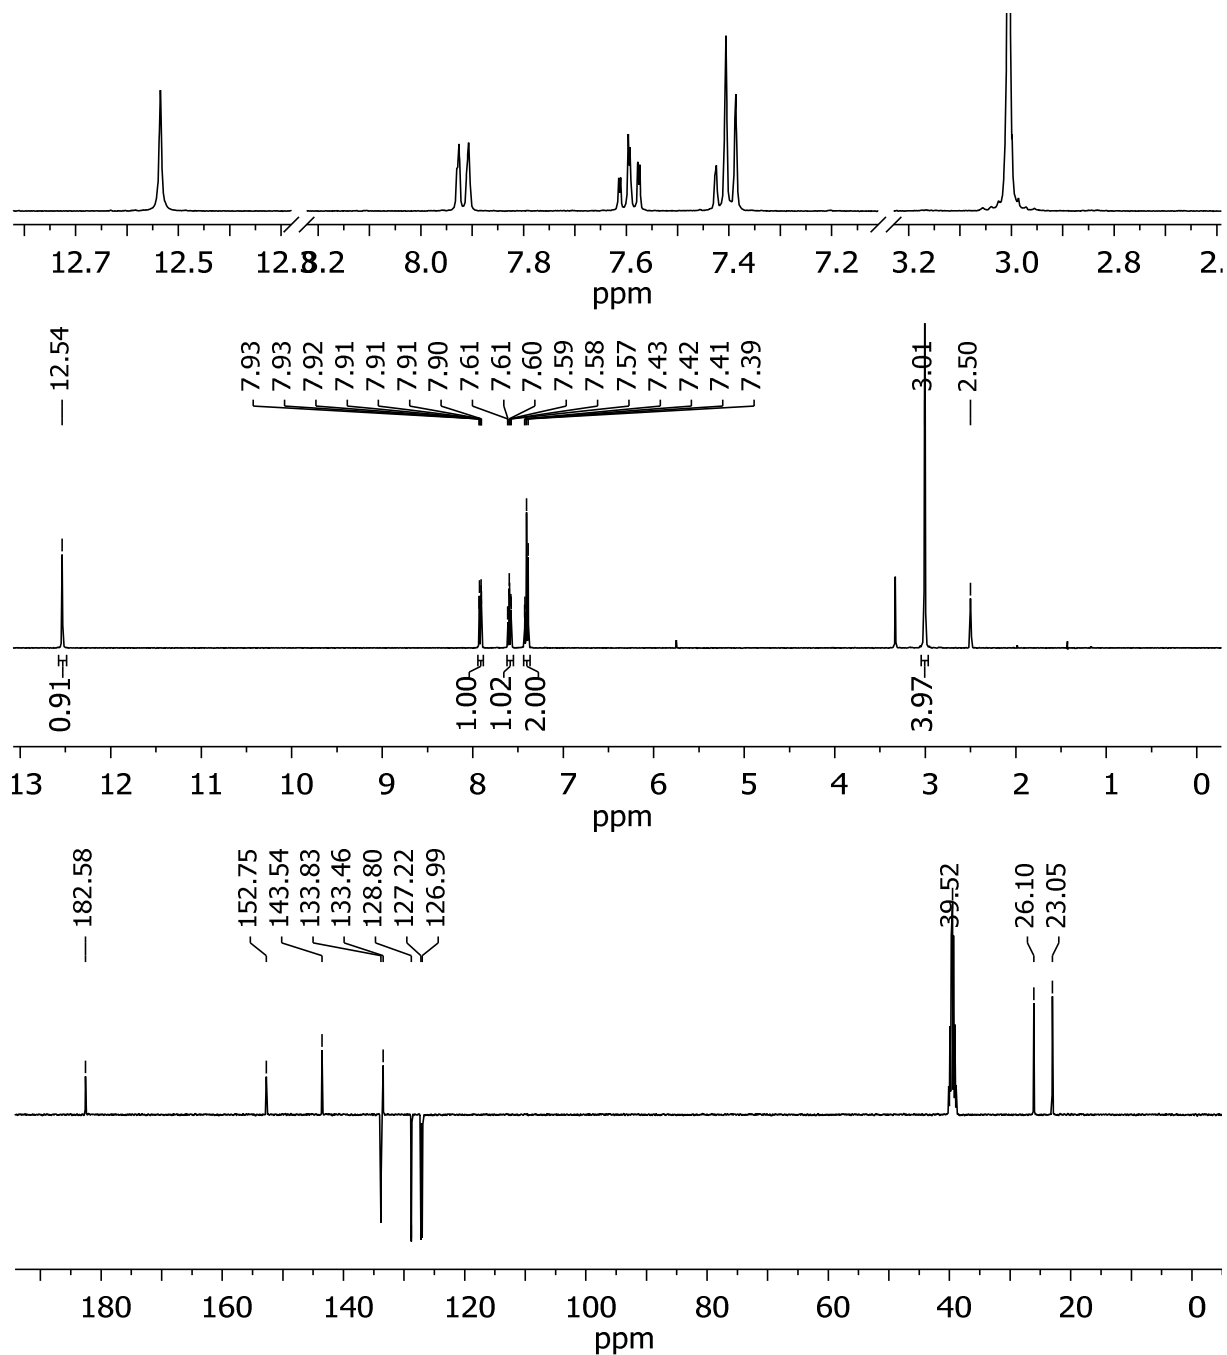

**2-(Methoxyimino)-1-tetralone S6** (CDCl<sub>3</sub>, <sup>1</sup>H-NMR: 400 MHz, APT: 100 MHz)

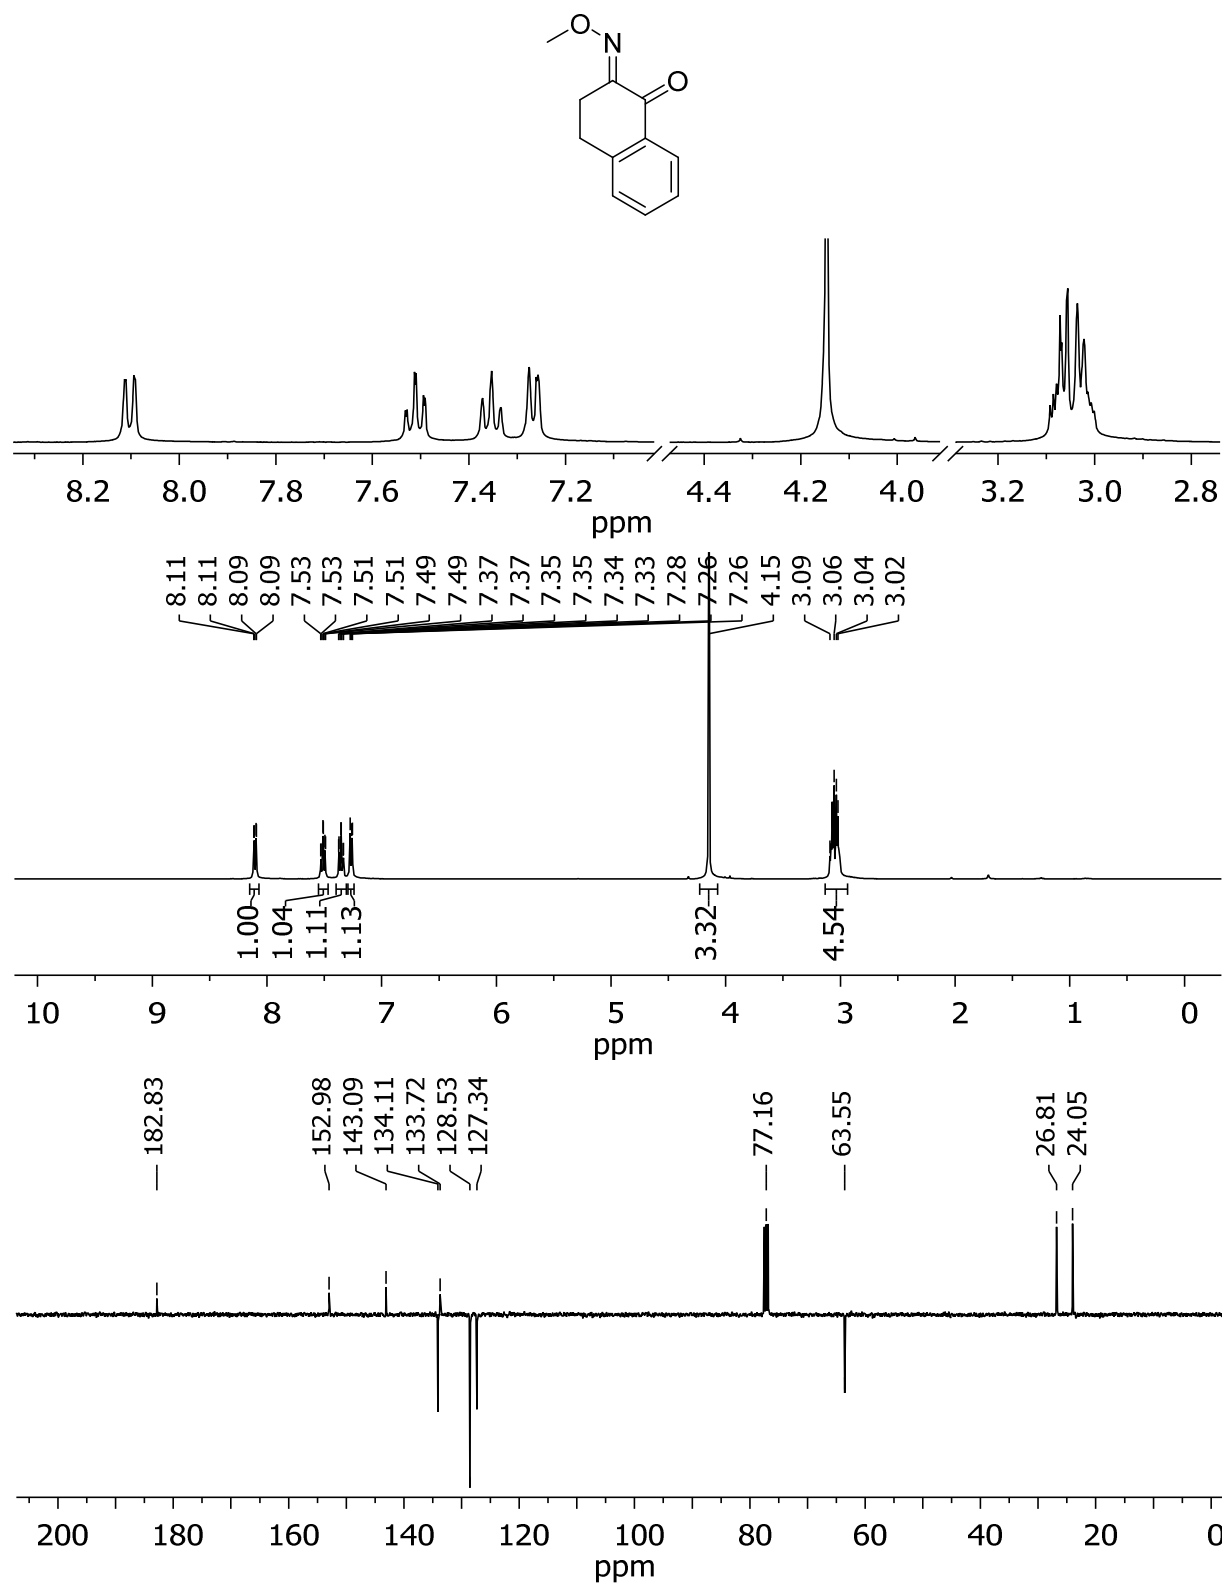

**2-Hydroxy oxime ether 4** (CDCl<sub>3</sub>, <sup>1</sup>H-NMR: 300 MHz, APT: 75 MHz)

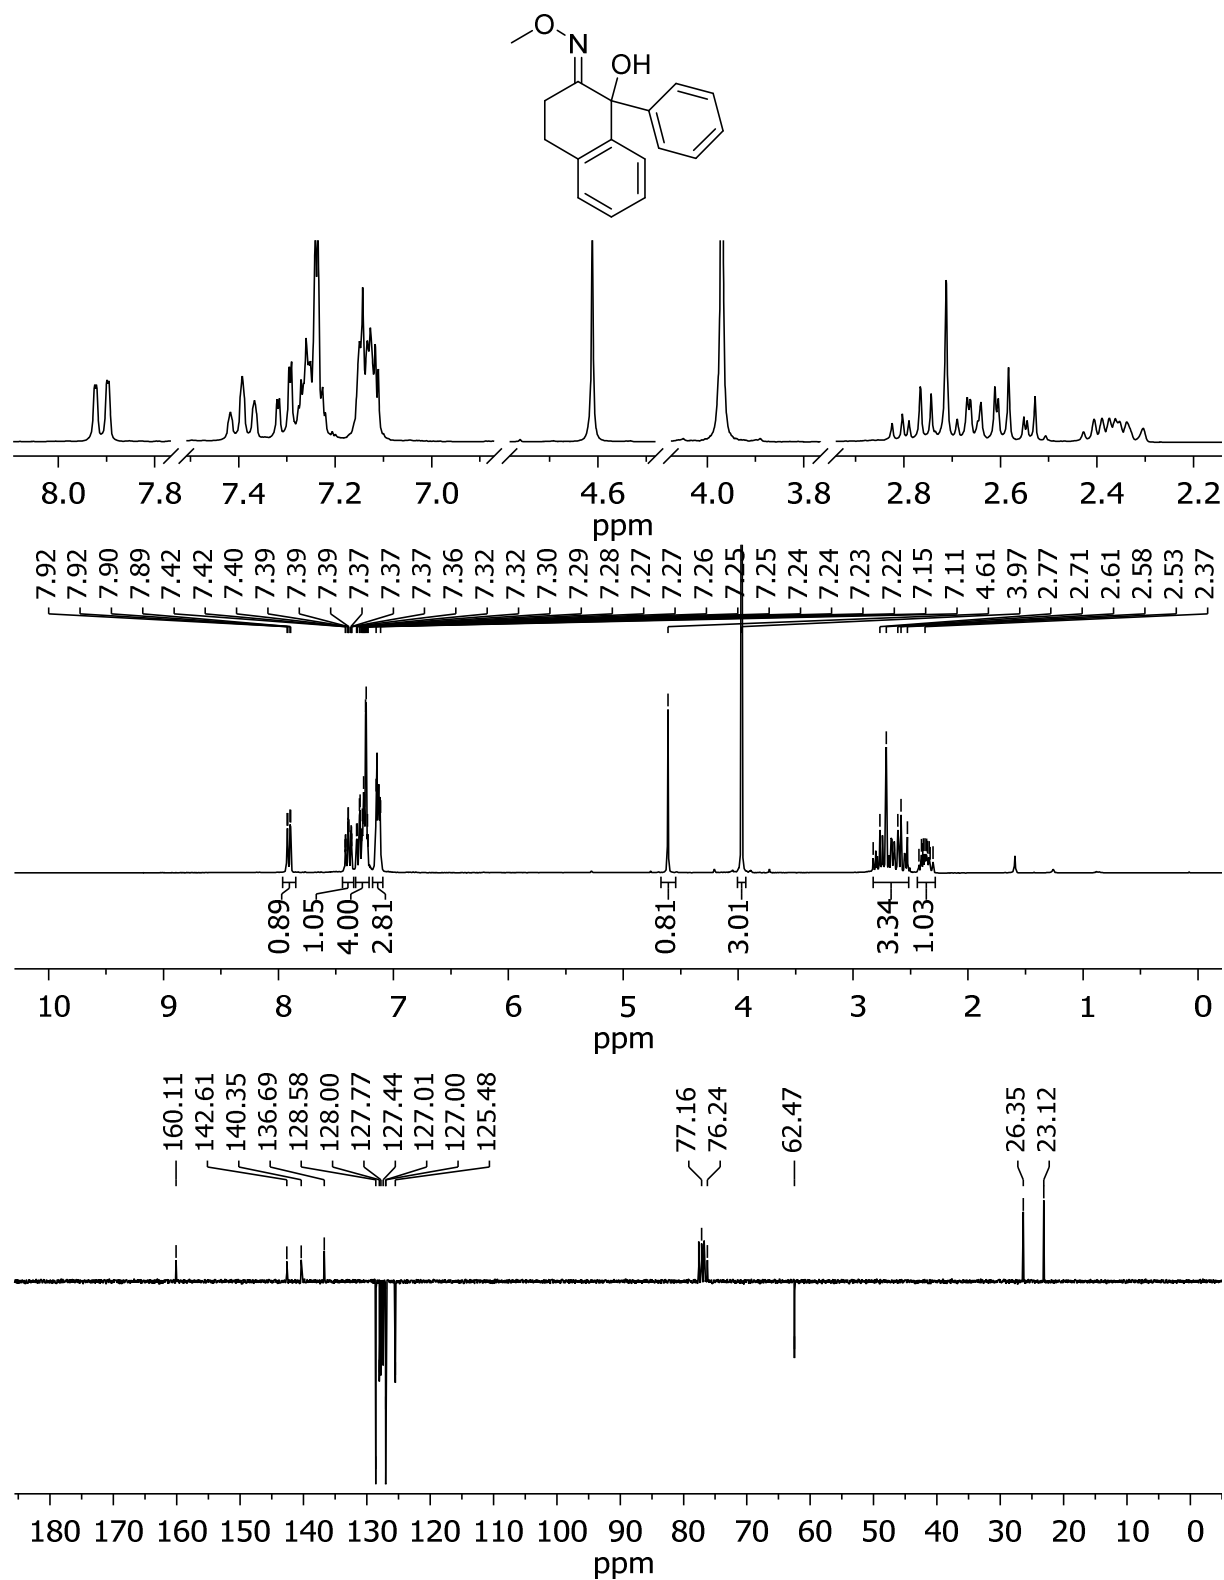

**2-Hydroxy oxime ether 5** ( $\text{CDCl}_3$ ,  $^1\text{H-NMR}$ : 400 MHz, APT: 100 MHz)

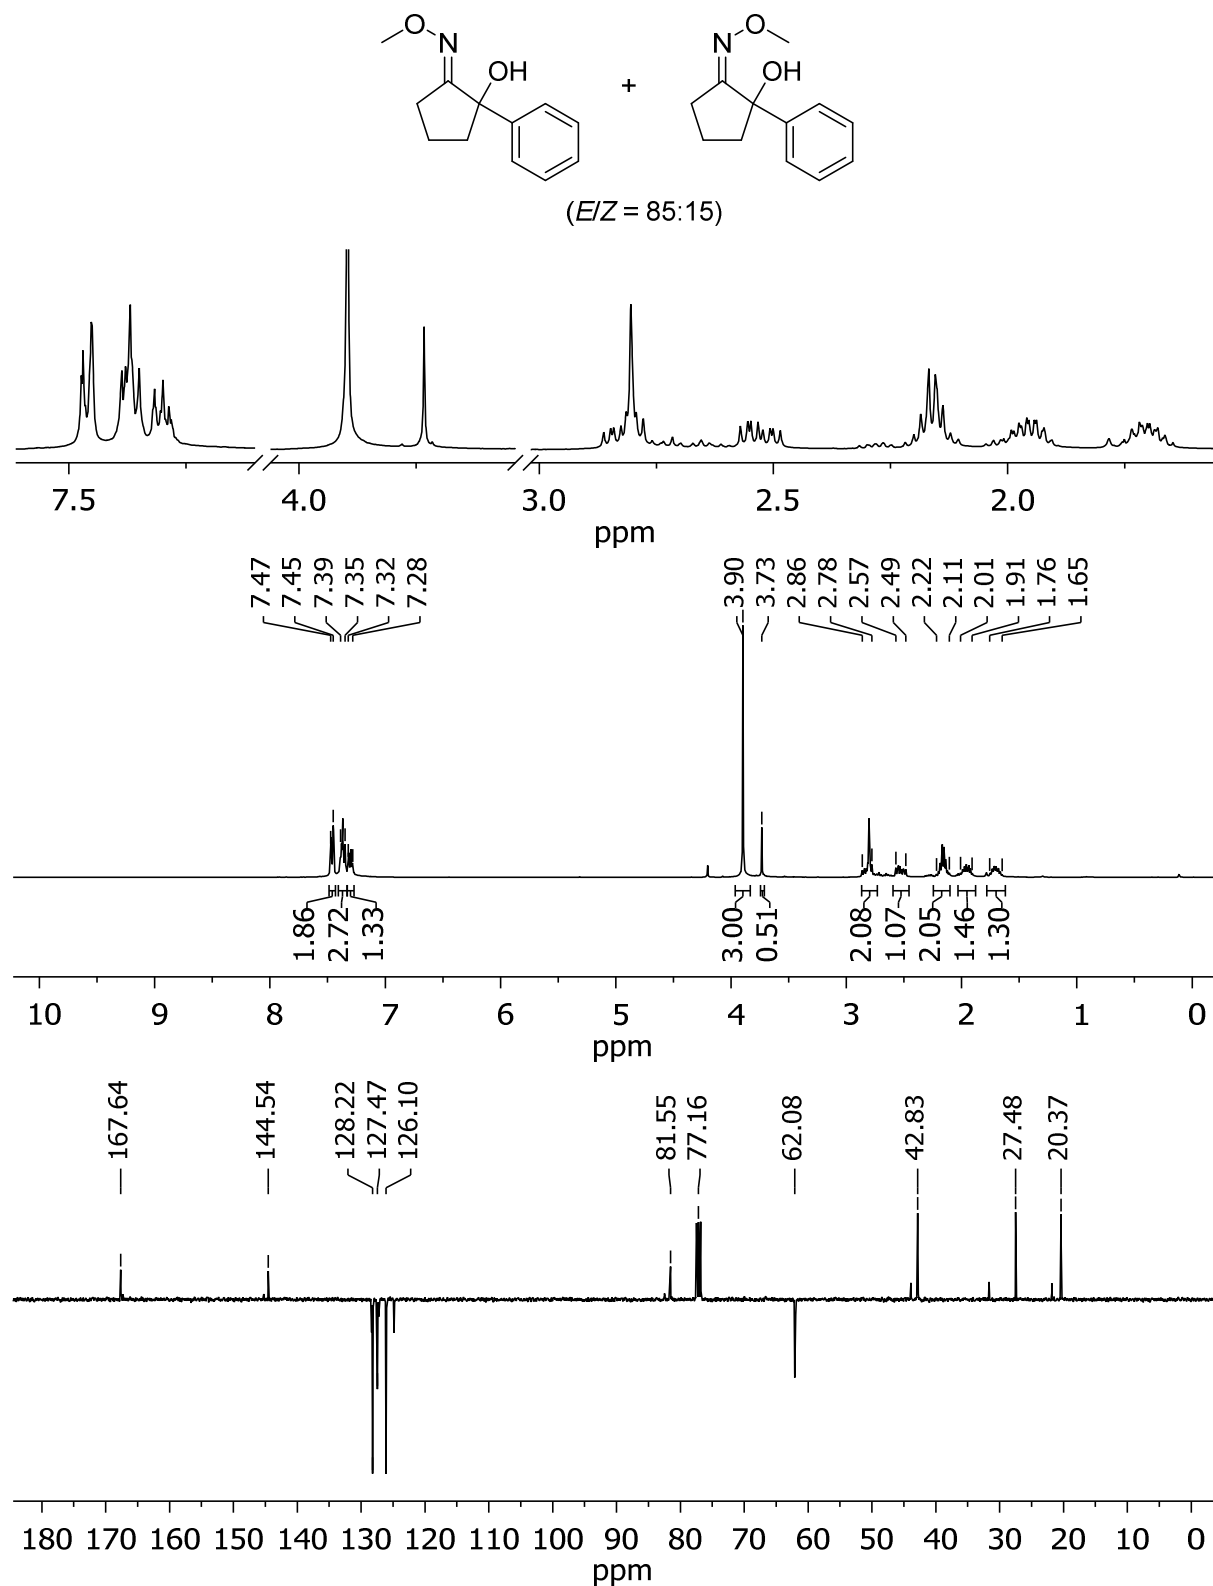

**2-Hydroxy oxime ether 6** (CDCl<sub>3</sub>, <sup>1</sup>H-NMR: 300 MHz, APT: 100 MHz)

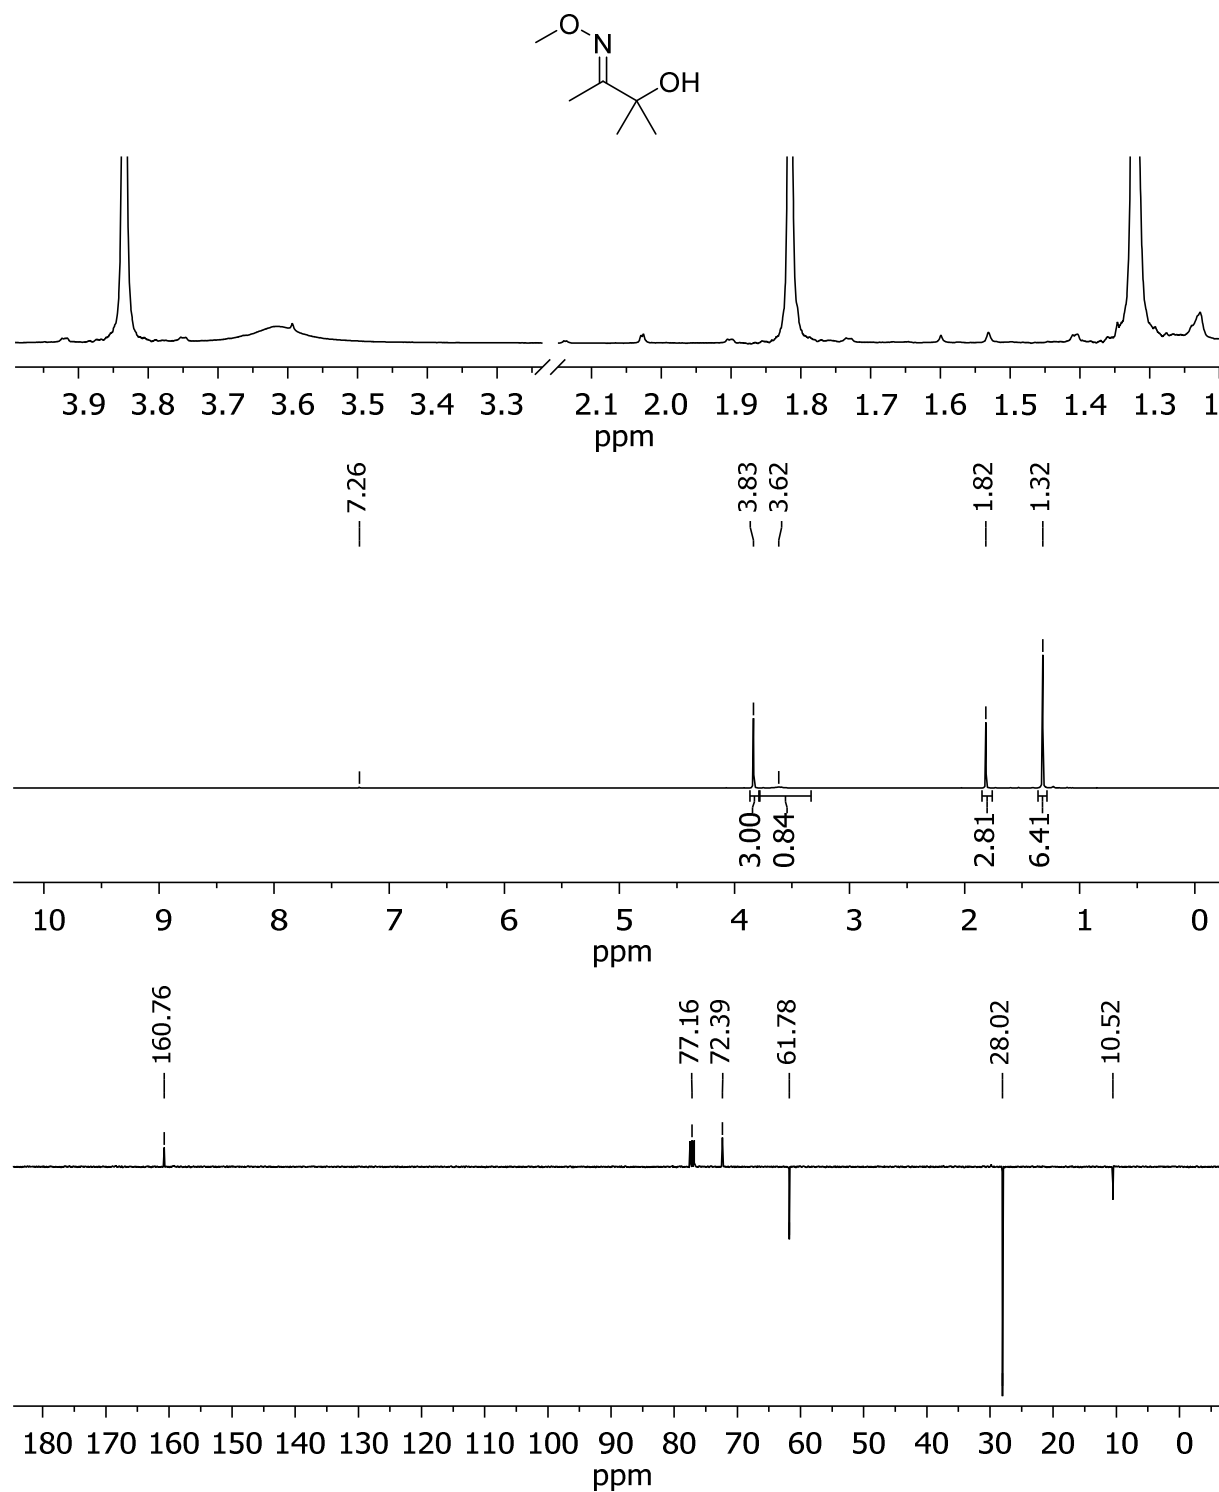

**2-Hydroxy oxime ether 7** (CDCl<sub>3</sub>, <sup>1</sup>H-NMR: 400 MHz, APT: 100 MHz)

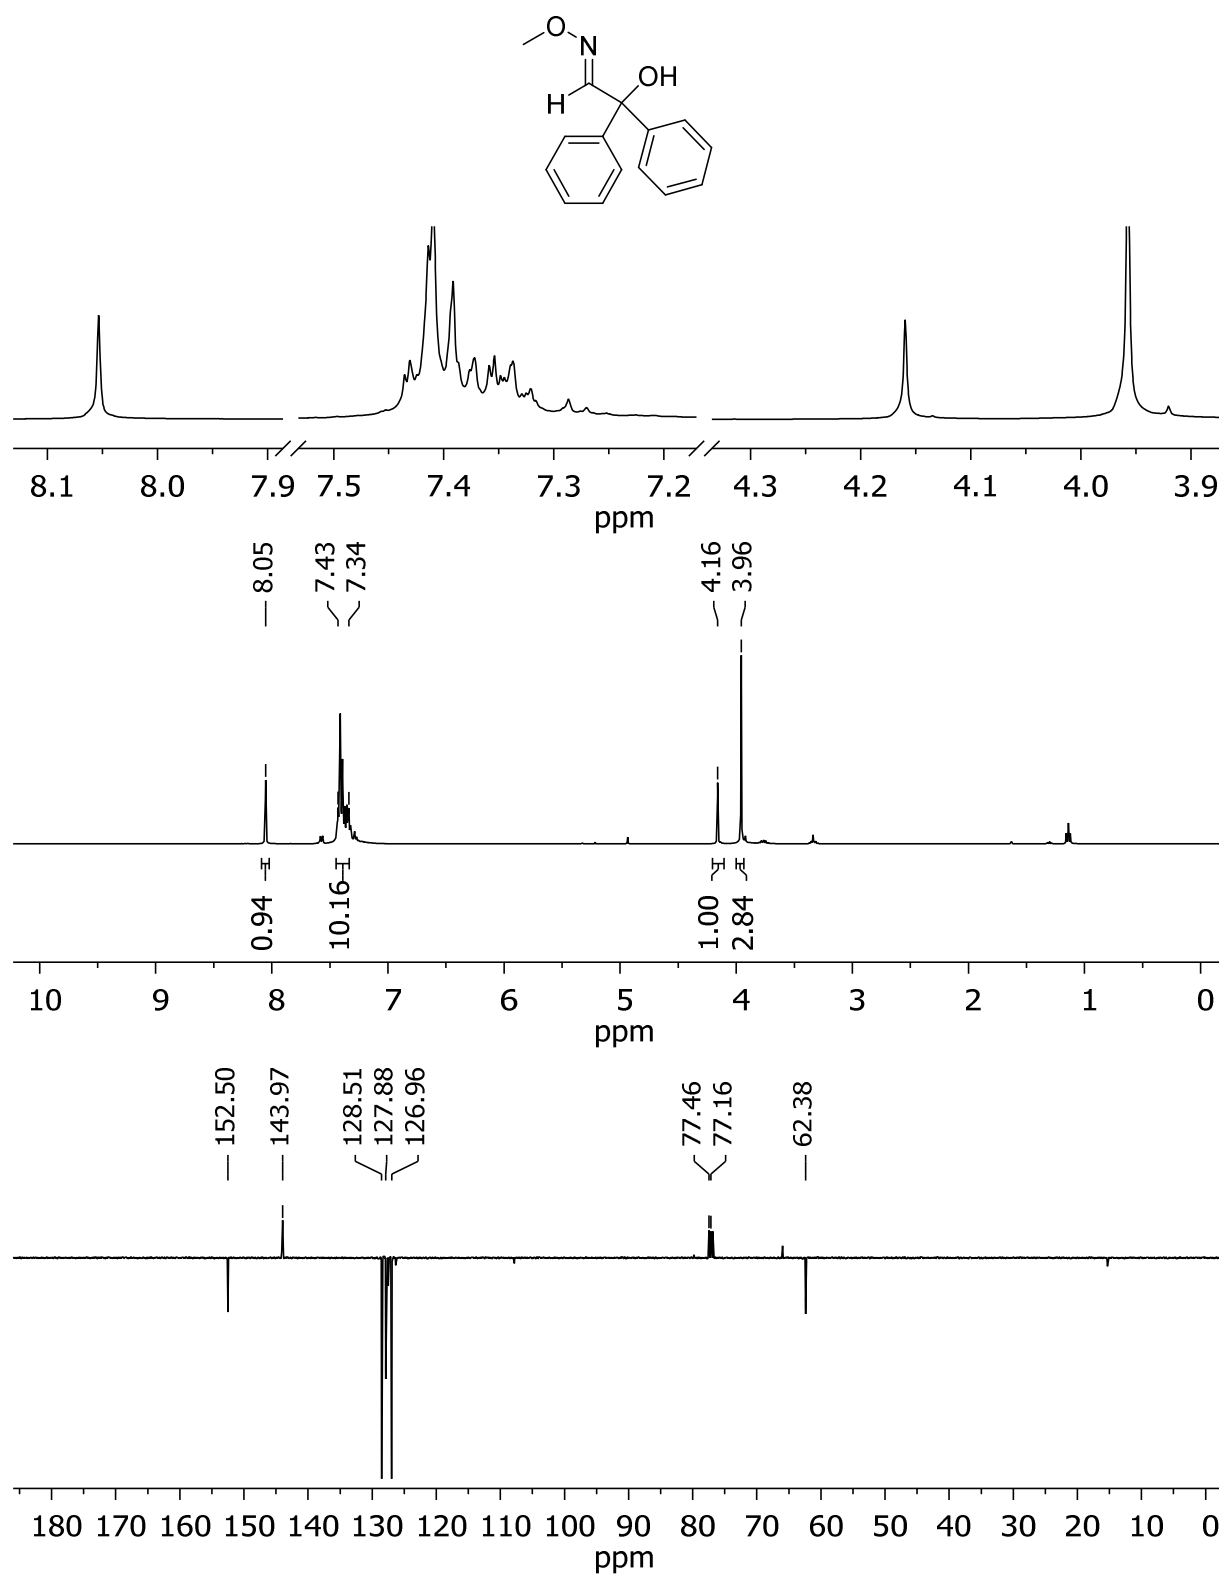

### 3 The Three-Component Reaction (3CR)

#### Intermediate 2a

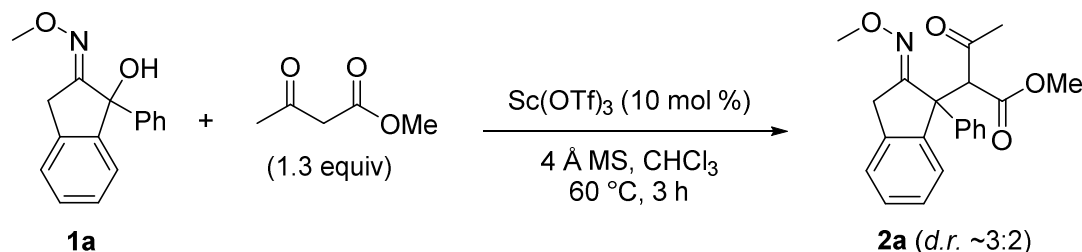

2-Hydroxy oxime ether **1a** (51 mg, 0.20 mmol, 1.0 equiv), methyl acetoacetate (28  $\mu\text{L}$ , 0.26 mmol, 1.3 equiv),  $\text{Sc(OTf)}_3$  (9.8 mg, 20  $\mu\text{mol}$ , 0.10 equiv) and 4 Å molecular sieve (50 mg) were placed in an oven dried and sealable DURAN® test tube. Abs.  $\text{CHCl}_3$  (1.0 mL) was added and the reaction mixture was heated to 60 °C for 3 h while stirring. After the reaction was completed, it was quenched with sat.  $\text{NaHCO}_3$ -solution and extracted twice with  $\text{CH}_2\text{Cl}_2$ . The combined organic phases were dried over  $\text{Na}_2\text{SO}_4$ , filtered and the solvent was removed under reduced pressure. The crude product was purified by flash column chromatography (50%  $\text{CH}_2\text{Cl}_2$ /hexane  $\rightarrow$   $\text{CH}_2\text{Cl}_2$   $\rightarrow$  30% MTBE/hexane). Compound **2a** was obtained as a colorless oil (68 mg, 97%, *d.r.* ~3:2) that crystallized slowly upon standing at 5 °C. The spectroscopic data are displayed for the inseparable diastereomeric mixture.

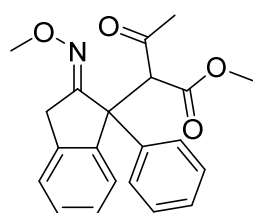

**R<sub>f</sub>**: 0.73 (DCM); **mp.**: 71 – 74 °C; **<sup>1</sup>H-NMR** (300 MHz,  $\text{CDCl}_3$ ):  $\delta$  (ppm) = 7.92 – 7.88 (m, 1H), 7.77 – 7.74 (m, 1H), 7.33 – 7.15 (m, 16H), 5.22 (s, 1H), 5.14 (s, 1H), 3.95 (s, 3H), 3.94 (d,  $J$  = 22.0 Hz, 1H), 3.94 (s, 3H), 3.91 (d,  $J$  = 22.0 Hz, 1H), 3.50 (d,  $J$  = 22.0 Hz, 1H), 3.50 (s, 3H), 3.47 (d,  $J$  = 22.0 Hz, 1H), 3.44 (s, 3H), 2.06 (s, 3H), 1.94 (s, 3H); **<sup>13</sup>C-NMR** (75 MHz,  $\text{CDCl}_3$ ):  $\delta$  (ppm) = 202.8 (C=O), 201.5 (C=O), 169.5 (C=O), 168.5 (C=O), 165.5 (C=N), 164.7 (C=N), 142.3 ( $\text{C}_q$ ), 142.1 ( $\text{C}_q$ ), 142.0 ( $\text{C}_q$ ), 141.8 ( $\text{C}_q$ ), 139.2 ( $\text{C}_q$ ), 138.7 ( $\text{C}_q$ ), 128.43 (CH), 128.39 (CH), 128.3 (3x CH), 128.2 (CH), 127.6 (CH), 127.4 (CH), 127.33 (2x CH), 127.31 (CH), 127.2 (2x CH), 127.10 (2x CH), 127.07 (CH), 125.2 (CH), 125.0 (CH), 68.4 (CH), 66.9 (CH), 62.3 ( $\text{CH}_3$ ), 62.2 ( $\text{CH}_3$ ), 59.3 ( $\text{C}_q$ ), 58.9 ( $\text{C}_q$ ), 52.14 ( $\text{CH}_3$ ), 52.10 ( $\text{CH}_3$ ), 32.9 (2x  $\text{CH}_2$ ), 32.8 ( $\text{CH}_3$ ), 30.5 ( $\text{CH}_3$ ); **IR** (KBr):  $\tilde{\nu}$  ( $\text{cm}^{-1}$ ) = 3447, 3066, 2952, 2934, 2893, 2813, 1743, 1717, 1596, 1493, 1481, 1459, 1445, 1433, 1356, 1327, 1241, 1203, 1191, 1166, 1152, 1048, 866, 763, 738, 725, 700, 560; **HR-MS** (ESI<sup>+</sup>): calcd. for  $\text{C}_{21}\text{H}_{21}\text{NO}_4\text{Na}$  ( $[\text{M}+\text{Na}]^+$ ): 374.1363, found: 374.1360; **M**( $\text{C}_{21}\text{H}_{21}\text{NO}_4$ ): 351.40.

### 3.1 Substrate Scope of the 3CR to Tetrahydroindeno[2,1-*b*]pyrroles 3

#### General procedure 2 of the 3CR

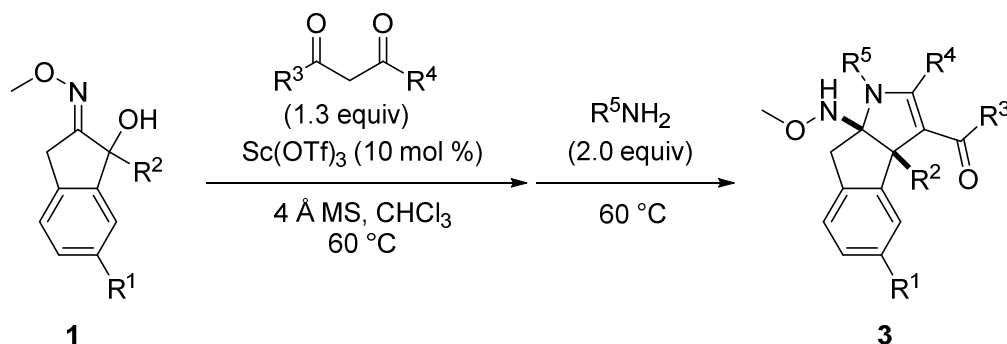

2-Hydroxy oxime ether **1** (1.0 equiv), a 1,3-dicarbonyl compound (1.3 equiv), Sc(OTf)<sub>3</sub> (0.10 equiv) and 4 Å molecular sieve (25 mg per 0.10 mmol **2**) were placed in an oven dried and sealable DURAN® test tube. Abs. CHCl<sub>3</sub> (1.0 mL) was added and the reaction mixture was heated to 60 °C while stirring. After complete formation of the intermediate, an amine (2.0 equiv) was added and it was stirred for the indicated time at 60 °C. The reaction mixture was quenched with sat. NaHCO<sub>3</sub>-solution and extracted twice with CH<sub>2</sub>Cl<sub>2</sub>. The combined organic phases were dried over Na<sub>2</sub>SO<sub>4</sub>, filtered and the solvent was removed under reduced pressure. The crude product was purified by flash column chromatography (5% → 40% MTBE/hexane). The products **3** were dried in vacuo (~0.1 mbar) at 60 °C overnight.

#### **Tetrahydroindeno[2,1-*b*]pyrrole 3a**

According to general procedure 2, 2-hydroxy oxime ether **1a** (51 mg, 0.20 mmol, 1.0 equiv), methyl acetoacetate (28 µL, 0.26 mmol, 1.3 equiv), Sc(OTf)<sub>3</sub> (9.8 mg, 20 µmol, 0.10 equiv) and 4 Å molecular sieve (50 mg) were dissolved in abs. CHCl<sub>3</sub> (1.0 mL) and the reaction mixture was heated to 60 °C for 3 h. Benzylamine (44 µL, 0.40 mmol, 2.0 equiv) was added and it was stirred at 60 °C for 2.5 days. Compound **3a** was obtained as a colorless solid (84 mg, 95%).

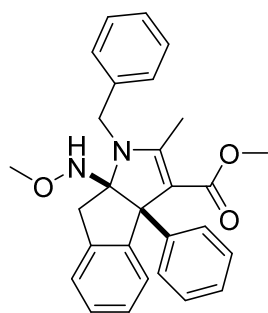

**R<sub>f</sub>**: 0.35 (30% MTBE/hexane); **mp.**: 176 – 178 °C; **<sup>1</sup>H-NMR** (400 MHz, CDCl<sub>3</sub>): δ (ppm) = 7.64 – 7.62 (m, 1H), 7.27 – 7.17 (m, 10H), 7.09 – 7.07 (m, 1H), 6.96 – 6.93 (m, 2H), 5.14 (bs, 1H), 4.80 (d, *J* = 17.5 Hz, 1H), 4.64 (d, *J* = 17.5 Hz, 1H), 3.59 (s, 3H), 3.26 (s, 3H), 3.04 (d, *J* = 16.5 Hz, 1H), 2.95 (d, *J* = 16.5 Hz, 1H), 2.25 (s, 3H); **<sup>13</sup>C-NMR** (100 MHz, CDCl<sub>3</sub>): δ (ppm) = 167.2 (C=O), 162.7 (C<sub>q</sub>), 148.2 (C<sub>q</sub>), 139.7 (C<sub>q</sub>), 139.3 (C<sub>q</sub>), 138.7 (C<sub>q</sub>), 128.7 (2x CH), 128.1 (CH), 127.4 (3x CH), 127.0 (CH), 126.9 (CH), 126.7 (CH), 125.7 (2x CH), 123.8 (CH), 102.1 (C<sub>q</sub>), 96.6



(C<sub>q</sub>), 68.4 (C<sub>q</sub>), 62.0 (CH<sub>3</sub>), 49.9 (CH<sub>3</sub>), 45.8 (CH<sub>2</sub>), 38.8 (CH<sub>2</sub>), 13.5 (CH<sub>3</sub>);\* **IR** (KBr):  $\tilde{\nu}$  (cm<sup>-1</sup>) = 3446, 2945, 1660, 1586, 1559, 1418, 1402, 1332, 1201, 1179, 1166, 1129, 1106, 947, 759, 745, 734, 698; **HR-MS** (ESI+): calcd. for C<sub>28</sub>H<sub>28</sub>N<sub>2</sub>O<sub>3</sub>Na ([M+Na]<sup>+</sup>): 463.1992, found: 463.1993; **M**(C<sub>28</sub>H<sub>28</sub>N<sub>2</sub>O<sub>3</sub>): 440.54.

#### Gram-scale procedure for **3a**:

According to general procedure 2, 2-hydroxy oxime ether **1a** (1.01 g, 4.00 mmol, 1.00 equiv), methyl acetoacetate (559  $\mu$ L, 5.20 mmol, 1.3 equiv), Sc(OTf)<sub>3</sub> (197 mg, 400  $\mu$ mol, 0.10 equiv) and 4 Å molecular sieve (1.0 g) were dissolved in abs. CHCl<sub>3</sub> (20 mL) and the reaction mixture was heated to 60 °C for 3 h. Benzylamine (874  $\mu$ L, 8.00 mmol, 2.00 equiv) was added and it was stirred at 60 °C for 2.5 days. Compound **3a** was obtained as a colorless solid (1.71 g, 95%). The spectroscopic data are in agreement with those listed above.

#### **Tetrahydroindeno[2,1-*b*]pyrrole **3b****

According to general procedure 2, 2-hydroxy oxime ether **1b** (54 mg, 0.20 mmol, 1.0 equiv), methyl acetoacetate (28  $\mu$ L, 0.26 mmol, 1.3 equiv), Sc(OTf)<sub>3</sub> (9.8 mg, 20  $\mu$ mol, 0.10 equiv) and 4 Å molecular sieve (50 mg) were dissolved in abs. CHCl<sub>3</sub> (1.0 mL) and the reaction mixture was heated to 60 °C for 3 h. Benzylamine (44  $\mu$ L, 0.40 mmol, 2.0 equiv) was added and it was stirred at 60 °C for 2 days. Compound **3b** was obtained as a colorless solid (82 mg, 91%).

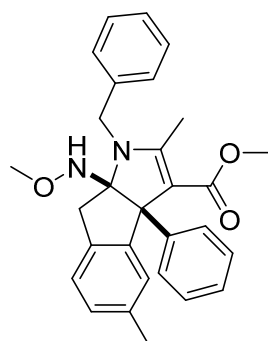

**R<sub>f</sub>**: 0.18 (20% MTBE/hexane); **mp.**: 85 – 87 °C; **<sup>1</sup>H-NMR** (300 MHz, CDCl<sub>3</sub>):  $\delta$  (ppm) = 7.44 (s, 1H), 7.27 – 7.17 (m, 8H), 7.08 – 7.05 (m, 1H), 7.00 – 6.95 (m, 3H), 5.14 (bs, 1H), 4.82 (d, *J* = 18.0 Hz, 1H), 4.64 (d, *J* = 18.0 Hz, 1H), 3.62 (s, 3H), 3.27 (s, 3H), 3.00 (d, *J* = 16.5 Hz, 1H), 2.88 (d, *J* = 16.5 Hz, 1H), 2.34 (s, 3H), 2.27 (s, 3H); **<sup>13</sup>C-NMR** (75 MHz, CDCl<sub>3</sub>):  $\delta$  (ppm) = 167.2 (C=O), 162.8 (C<sub>q</sub>), 148.3 (C<sub>q</sub>), 139.8 (C<sub>q</sub>), 139.3 (C<sub>q</sub>), 137.6 (C<sub>q</sub>), 135.5 (C<sub>q</sub>), 128.7 (2x CH), 128.4 (CH), 127.3 (2x CH), 127.2 (CH), 126.9 (CH), 126.6 (CH), 125.7 (2x CH), 123.5 (CH), 102.0 (C<sub>q</sub>), 96.9 (C<sub>q</sub>), 68.3 (C<sub>q</sub>), 61.9 (CH<sub>3</sub>), 49.8 (CH<sub>3</sub>), 45.7 (CH<sub>2</sub>), 38.4 (CH<sub>2</sub>), 21.8 (CH<sub>3</sub>), 13.5 (CH<sub>3</sub>);\* **IR** (KBr):  $\tilde{\nu}$  (cm<sup>-1</sup>) = 3455, 3023, 2942, 2893, 1664, 1586, 1564, 1494, 1465, 1446, 1431, 1421, 1403, 1335, 1296, 1213, 1183, 1169, 1076, 1131, 1106, 1076, 1065, 1041, 946, 926, 771, 744, 732, 723, 698; **HR-MS** (ESI+): calcd. for C<sub>29</sub>H<sub>30</sub>N<sub>2</sub>O<sub>3</sub>Na ([M+Na]<sup>+</sup>): 477.2149, found: 477.2147; **M**(C<sub>29</sub>H<sub>30</sub>N<sub>2</sub>O<sub>3</sub>): 454.57.

\* One <sup>13</sup>C-signal is very broad and could not be clearly detected.

### Tetrahydroindeno[2,1-*b*]pyrrole 3d

According to general procedure 2, 2-hydroxy oxime ether **1d** (54 mg, 0.20 mmol, 1.0 equiv), methyl acetoacetate (28  $\mu$ L, 0.26 mmol, 1.3 equiv), Sc(OTf)<sub>3</sub> (9.8 mg, 20  $\mu$ mol, 0.10 equiv) and 4 Å molecular sieve (50 mg) were dissolved in abs. CHCl<sub>3</sub> (1.0 mL) and the reaction mixture was heated to 60 °C for 3 h. Benzylamine (44  $\mu$ L, 0.40 mmol, 2.0 equiv) was added and it was stirred at 60 °C for 2 days. Compound **3d** was obtained as a colorless solid (86 mg, 95%).

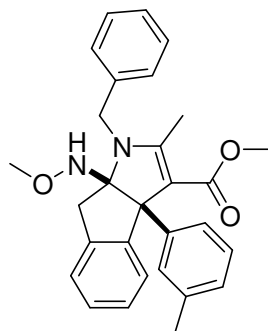

**R<sub>f</sub>**: 0.23 (20% MTBE/hexane); **mp.**: 185 – 187 °C; **<sup>1</sup>H-NMR** (400 MHz, CDCl<sub>3</sub>):  $\delta$  (ppm) = 7.65 – 7.62 (m, 1H), 7.29 – 7.17 (m, 6H), 7.13 – 7.07 (m, 3H), 7.04 – 7.02 (m, 1H), 6.96 – 6.93 (m, 2H), 5.14 (bs, 1H), 4.79 (d,  $J$  = 17.5 Hz, 1H), 4.64 (d,  $J$  = 17.5 Hz, 1H), 3.59 (s, 3H), 3.27 (s, 3H), 3.03 (d,  $J$  = 16.5 Hz, 1H), 2.95 (d,  $J$  = 16.5 Hz, 1H), 2.28 (bs, 3H), 2.25 (s, 3H); **<sup>13</sup>C-NMR** (100 MHz, CDCl<sub>3</sub>):  $\delta$  (ppm) = 167.2 (C=O), 162.6 (C<sub>q</sub>), 148.2 (C<sub>q</sub>), 139.5 (C<sub>q</sub>), 139.4 (C<sub>q</sub>), 138.7 (C<sub>q</sub>), 136.7 (C<sub>q</sub>), 128.7 (2x CH), 128.0 (CH), 127.5 (CH), 127.3 (CH), 127.2 (CH), 127.0 (2x CH), 125.7 (2x CH), 123.7 (CH), 102.3 (C<sub>q</sub>), 96.5 (C<sub>q</sub>), 68.4 (C<sub>q</sub>), 61.9 (CH<sub>3</sub>), 49.9 (CH<sub>3</sub>), 45.8 (CH<sub>2</sub>), 38.9 (CH<sub>2</sub>), 21.7 (CH<sub>3</sub>), 13.5 (CH<sub>3</sub>);\* **IR** (KBr):  $\tilde{\nu}$  (cm<sup>-1</sup>) = 3445, 3023, 2943, 1661, 1601, 1586, 1566, 1477, 1459, 1424, 1402, 1328, 1294, 1193, 1186, 1166, 1127, 1064, 1049, 934, 785, 751, 736, 696; **HR-MS** (ESI<sup>+</sup>): calcd. for C<sub>29</sub>H<sub>30</sub>N<sub>2</sub>O<sub>3</sub>Na ([M+Na]<sup>+</sup>): 477.2149, found: 477.2150; **M(C<sub>29</sub>H<sub>30</sub>N<sub>2</sub>O<sub>3</sub>)**: 454.57.

### Tetrahydroindeno[2,1-*b*]pyrrole 3e

According to general procedure 2, 2-hydroxy oxime ether **1e** (54 mg, 0.20 mmol, 1.0 equiv), methyl acetoacetate (28  $\mu$ L, 0.26 mmol, 1.3 equiv), Sc(OTf)<sub>3</sub> (9.8 mg, 20  $\mu$ mol, 0.10 equiv) and 4 Å molecular sieve (50 mg) were dissolved in abs. CHCl<sub>3</sub> (1.0 mL) and the reaction mixture was heated to 60 °C for 3 h. Benzylamine (44  $\mu$ L, 0.40 mmol, 2.0 equiv) was added and it was stirred at 60 °C for 2 days. Compound **3e** was obtained as a colorless solid (88 mg, 97%).

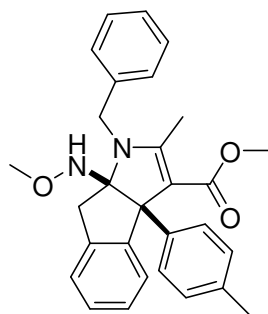

**R<sub>f</sub>**: 0.29 (20% MTBE/hexane); **mp.**: 185 – 186 °C; **<sup>1</sup>H-NMR** (400 MHz, CDCl<sub>3</sub>):  $\delta$  (ppm) = 7.67 – 7.64 (m, 1H), 7.31 – 7.20 (m, 7H), 7.12 – 7.05 (m, 3H), 6.98 – 6.96 (m, 2H), 5.20 (bs, 1H), 4.83 (d,  $J$  = 17.5 Hz, 1H), 4.67 (d,  $J$  = 17.5 Hz, 1H), 3.63 (s, 3H), 3.32 (s, 3H), 3.06 (d,  $J$  = 16.5 Hz, 1H), 2.96 (d,  $J$  = 16.5 Hz, 1H), 2.35 (s, 3H), 2.27 (s, 3H); **<sup>13</sup>C-NMR** (100 MHz, CDCl<sub>3</sub>):  $\delta$  (ppm) = 167.2 (C=O), 162.6 (C<sub>q</sub>), 148.4

\* Two <sup>13</sup>C-signals are very broad and could not be clearly detected.

(C<sub>q</sub>), 139.4 (C<sub>q</sub>), 138.7 (C<sub>q</sub>), 136.5 (C<sub>q</sub>), 136.1 (C<sub>q</sub>), 128.7 (2x CH), 128.2 (2x CH), 128.0 (CH), 127.3 (CH), 126.95 (CH), 126.93 (CH), 125.7 (2x CH), 123.7 (CH), 102.3 (C<sub>q</sub>), 96.5 (C<sub>q</sub>), 68.1 (C<sub>q</sub>), 62.0 (CH<sub>3</sub>), 49.9 (CH<sub>2</sub>), 38.9 (CH<sub>2</sub>), 21.2 (CH<sub>3</sub>), 13.5 (CH<sub>3</sub>);\* **IR** (KBr):  $\tilde{\nu}$  (cm<sup>-1</sup>) = 3501, 3024, 2941, 2894, 1663, 1644, 1558, 1475, 1421, 1402, 1330, 1297, 1200, 1186, 1165, 1129, 1107, 1063, 1040, 945, 930, 804, 750, 734, 726, 698; **HR-MS** (ESI<sup>+</sup>): calcd. for C<sub>29</sub>H<sub>30</sub>N<sub>2</sub>O<sub>3</sub>Na ([M+Na]<sup>+</sup>): 477.2149, found: 477.2152; **M**(C<sub>29</sub>H<sub>30</sub>N<sub>2</sub>O<sub>3</sub>): 454.57.

### Tetrahydroindeno[2,1-*b*]pyrrole 3f

According to general procedure 2, 2-hydroxy oxime ether **1f** (62 mg, 0.20 mmol, 1.0 equiv), methyl acetoacetate (28  $\mu$ L, 0.26 mmol, 1.3 equiv), Sc(OTf)<sub>3</sub> (9.8 mg, 20  $\mu$ mol, 0.10 equiv) and 4 Å molecular sieve (50 mg) were dissolved in abs. CHCl<sub>3</sub> (1.0 mL) and the reaction mixture was heated to 60 °C for 3 h. Benzylamine (44  $\mu$ L, 0.40 mmol, 2.0 equiv) was added and it was stirred at 60 °C for 4 days. Compound **3f** was obtained as a colorless solid (89 mg, 89%).

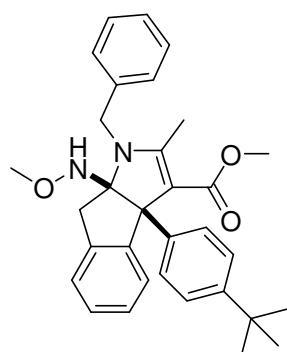

**R<sub>f</sub>**: 0.32 (20% MTBE/hexane); **mp.**: 142 – 144 °C; **<sup>1</sup>H-NMR** (400 MHz, CDCl<sub>3</sub>):  $\delta$  (ppm) = 7.66 – 7.63 (m, 1H), 7.29 – 7.17 (m, 9H), 7.09 – 7.06 (m, 1H), 6.96 – 6.93 (m, 2H), 5.12 (bs, 1H), 4.81 (d, *J* = 17.5 Hz, 1H), 4.64 (d, *J* = 17.5 Hz, 1H), 3.60 (s, 3H), 3.26 (s, 3H), 3.03 (d, *J* = 16.5 Hz, 1H), 2.93 (d, *J* = 16.5 Hz, 1H), 2.24 (s, 3H), 1.31 (s, 9H); **<sup>13</sup>C-NMR** (100 MHz, CDCl<sub>3</sub>):  $\delta$  (ppm) = 167.3 (C=O), 162.6 (C<sub>q</sub>), 149.2 (C<sub>q</sub>), 148.4 (C<sub>q</sub>), 139.4 (C<sub>q</sub>), 138.6 (C<sub>q</sub>), 136.4 (C<sub>q</sub>), 128.7 (2x CH), 128.0 (CH), 127.3 (CH), 126.9 (2x CH), 125.7 (2x CH), 124.2 (2x CH), 123.7 (CH), 102.2 (C<sub>q</sub>), 96.5 (C<sub>q</sub>), 68.1 (C<sub>q</sub>), 61.8 (CH<sub>3</sub>), 49.9 (CH<sub>3</sub>), 45.8 (CH<sub>2</sub>), 38.9 (CH<sub>2</sub>), 34.5 (C<sub>q</sub>), 31.5 (3x CH<sub>3</sub>), 13.5 (CH<sub>3</sub>);\* **IR** (KBr):  $\tilde{\nu}$  (cm<sup>-1</sup>) = 3459, 3028, 2960, 2900, 2866, 1673, 1589, 1577, 1473, 1463, 1418, 1400, 1338, 1326, 1201, 1165, 1132, 754, 732; **HR-MS** (ESI<sup>+</sup>): calcd. for C<sub>32</sub>H<sub>36</sub>N<sub>2</sub>O<sub>3</sub>Na ([M+Na]<sup>+</sup>): 519.2618, found: 519.2619; **M**(C<sub>32</sub>H<sub>36</sub>N<sub>2</sub>O<sub>3</sub>): 496.65.

### Tetrahydroindeno[2,1-*b*]pyrrole 3g

According to general procedure 2, 2-hydroxy oxime ether **1g** (66 mg, 0.20 mmol, 1.0 equiv), methyl acetoacetate (28  $\mu$ L, 0.26 mmol, 1.3 equiv), Sc(OTf)<sub>3</sub> (9.8 mg, 20  $\mu$ mol, 0.10 equiv) and 4 Å molecular sieve (50 mg) were dissolved in abs. CHCl<sub>3</sub> (1.0 mL) and the reaction mixture was heated to 60 °C for 3 h. Benzylamine (44  $\mu$ L, 0.40 mmol, 2.0 equiv) was added

\* One <sup>13</sup>C-signal is very broad and could not be clearly detected.

and it was stirred at 60 °C for 3 days. Compound **3g** was obtained as a colorless solid (95 mg, 92%).

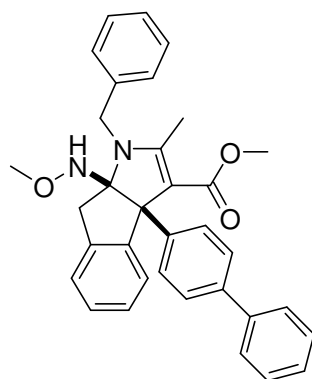

**R<sub>f</sub>**: 0.26 (20% MTBE/hexane); **mp.**: 109 – 111 °C; **<sup>1</sup>H-NMR** (400 MHz, CDCl<sub>3</sub>): δ (ppm) = 7.69 – 7.67 (m, 1H), 7.64 – 7.62 (m, 2H), 7.52 – 7.46 (m, 2H), 7.43 (t, *J* = 7.5 Hz, 2H), 7.34 – 7.19 (m, 8H), 7.13 – 7.10 (m, 1H), 6.98 – 6.96 (m, 2H), 5.23 (bs, 1H), 4.83 (d, *J* = 17.5 Hz, 1H), 4.67 (d, *J* = 17.5 Hz, 1H), 3.63 (s, 3H), 3.30 (s, 3H), 3.07 (d, *J* = 16.5 Hz, 1H), 2.98 (d, *J* = 16.5 Hz, 1H), 2.28 (s, 3H); **<sup>13</sup>C-NMR** (100 MHz, CDCl<sub>3</sub>): δ (ppm) = 167.2 (C=O), 162.8 (C<sub>q</sub>), 148.2 (C<sub>q</sub>), 141.1 (C<sub>q</sub>), 139.3 (C<sub>q</sub>), 139.2 (C<sub>q</sub>), 138.9 (C<sub>q</sub>), 138.6 (C<sub>q</sub>), 128.8 (2x CH), 128.7 (2x CH), 128.2 (CH), 127.4 (CH), 127.2 (CH), 127.1 (2x CH), 127.0 (CH), 126.9 (CH), 126.0 (2x CH), 125.7 (2x CH), 123.8 (CH), 102.1 (C<sub>q</sub>), 96.6 (C<sub>q</sub>), 68.2 (C<sub>q</sub>), 62.0 (CH<sub>3</sub>), 50.0 (CH<sub>3</sub>), 45.8 (CH<sub>2</sub>), 38.9 (CH<sub>2</sub>), 13.5 (CH<sub>3</sub>);\* **IR** (KBr):  $\tilde{\nu}$  (cm<sup>-1</sup>) = 3446, 3027, 2942, 1715, 1670, 1586, 1574, 1487, 1418, 1402, 1339, 1326, 1202, 1130, 1038, 758, 743, 698; **HR-MS** (ESI<sup>+</sup>): calcd. for C<sub>34</sub>H<sub>32</sub>N<sub>2</sub>O<sub>3</sub>Na ([M+Na]<sup>+</sup>): 539.2305, found: 539.2310; **M**(C<sub>34</sub>H<sub>32</sub>N<sub>2</sub>O<sub>3</sub>): 516.64.

### Tetrahydroindeno[2,1-*b*]pyrrole **3h**

According to general procedure 2, 2-hydroxy oxime ether **1h** (57 mg, 0.20 mmol, 1.0 equiv), methyl acetoacetate (28 μL, 0.26 mmol, 1.3 equiv), Sc(OTf)<sub>3</sub> (9.8 mg, 20 μmol, 0.10 equiv) and 4 Å molecular sieve (50 mg) were dissolved in abs. CHCl<sub>3</sub> (1.0 mL) and the reaction mixture was heated to 60 °C for 3 h. Benzylamine (44 μL, 0.40 mmol, 2.0 equiv) was added and it was stirred at 60 °C for 2.5 days. Compound **3h** was obtained as a colorless solid (84 mg, 89%).

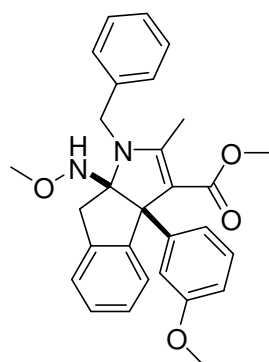

**R<sub>f</sub>**: 0.30 (40% MTBE/hexane); **mp.**: 169 – 171 °C; **<sup>1</sup>H-NMR** (300 MHz, CDCl<sub>3</sub>): δ (ppm) = 7.65 – 7.62 (m, 1H), 7.28 – 7.17 (m, 8H), 7.08 – 7.06 (m, 1H), 6.95 – 6.93 (m, 2H), 6.77 (ddd, *J* = 8.0, 2.5, 1.0 Hz, 1H), 5.20 (bs, 1H), 4.80 (d, *J* = 17.5 Hz, 1H), 4.64 (d, *J* = 17.5 Hz, 1H), 3.73 (bs, 3H), 3.60 (s, 3H), 3.30 (s, 3H), 3.03 (d, *J* = 16.5 Hz, 1H), 2.94 (d, *J* = 16.5 Hz, 1H), 2.24 (s, 3H); **<sup>13</sup>C-NMR** (75 MHz, CDCl<sub>3</sub>): δ (ppm) = 167.2 (C=O), 162.8 (C<sub>q</sub>), 159.0 (C<sub>q</sub>), 148.0 (C<sub>q</sub>), 141.5 (C<sub>q</sub>), 139.3 (C<sub>q</sub>), 138.6 (C<sub>q</sub>), 128.7 (2x CH), 128.2 (CH), 128.1 (CH), 127.4 (CH), 127.0 (CH), 126.9 (CH), 125.7 (2x CH), 123.8 (CH), 115.3 (CH), 102.2 (C<sub>q</sub>), 96.6 (C<sub>q</sub>), 68.4 (C<sub>q</sub>), 62.0 (CH<sub>3</sub>), 55.3 (CH<sub>3</sub>), 49.9 (CH<sub>3</sub>), 45.8 (CH<sub>2</sub>), 38.8 (CH<sub>2</sub>), 13.5 (CH<sub>3</sub>);\*\* **IR** (KBr):  $\tilde{\nu}$

\* One <sup>13</sup>C-signal is very broad and could not be clearly detected.

\*\* Two <sup>13</sup>C-signals are very broad and could not be clearly detected.

( $\text{cm}^{-1}$ ) = 3433, 3025, 2981, 2939, 2896, 2835, 1664, 1607, 1584, 1572, 1487, 1478, 1461, 1450, 1426, 1402, 1360, 1328, 1287, 1264, 1201, 1167, 1127, 1108, 1076, 1055, 1043, 955, 933, 779, 767, 751, 739, 725, 696, 457; **HR-MS** (ESI<sup>+</sup>): calcd. for  $\text{C}_{29}\text{H}_{30}\text{N}_2\text{O}_4\text{Na}$  ( $[\text{M}+\text{Na}]^+$ ): 493.2098, found: 493.2095; **M**( $\text{C}_{29}\text{H}_{30}\text{N}_2\text{O}_4$ ): 470.57.

### Tetrahydroindeno[2,1-*b*]pyrrole 3i

According to general procedure 2, 2-hydroxy oxime ether **1i** (57 mg, 0.20 mmol, 1.0 equiv), methyl acetoacetate (28  $\mu\text{L}$ , 0.26 mmol, 1.3 equiv),  $\text{Sc}(\text{OTf})_3$  (9.8 mg, 20  $\mu\text{mol}$ , 0.10 equiv) and 4 Å molecular sieve (50 mg) were dissolved in abs.  $\text{CHCl}_3$  (1.0 mL) and the reaction mixture was heated to 60 °C for 3 h. Benzylamine (44  $\mu\text{L}$ , 0.40 mmol, 2.0 equiv) was added and it was stirred at 60 °C for 2 days. Compound **3i** was obtained as a colorless solid (92 mg, 98%).

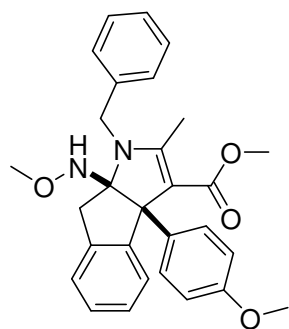

**R<sub>f</sub>**: 0.26 (30% MTBE/hexane); **mp.**: 146 – 148 °C; **<sup>1</sup>H-NMR** (400 MHz,  $\text{CDCl}_3$ ):  $\delta$  (ppm) = 7.63 – 7.61 (m, 1H), 7.27 – 7.17 (m, 7H), 7.08 – 7.06 (m, 1H), 6.95 – 6.93 (m, 2H), 6.80 – 6.74 (m, 2H), 5.15 (bs, 1H), 4.79 (d,  $J$  = 17.5 Hz, 1H), 4.64 (d,  $J$  = 17.5 Hz, 1H), 3.79 (s, 3H), 3.60 (s, 3H), 3.29 (s, 3H), 3.02 (d,  $J$  = 16.5 Hz, 1H), 2.92 (d,  $J$  = 16.5 Hz, 1H), 2.23 (s, 3H); **<sup>13</sup>C-NMR** (100 MHz,  $\text{CDCl}_3$ ):  $\delta$  (ppm) = 167.2 (C=O), 162.6 ( $\text{C}_q$ ), 158.3 ( $\text{C}_q$ ), 148.4 ( $\text{C}_q$ ), 139.4 ( $\text{C}_q$ ), 138.6 ( $\text{C}_q$ ), 131.7 ( $\text{C}_q$ ), 128.7 (2x CH), 128.0 (CH), 127.3 (CH), 127.0 (CH), 126.9 (CH), 125.7 (2x CH), 123.7 (CH), 112.8 (2x CH), 102.3 ( $\text{C}_q$ ), 96.4 ( $\text{C}_q$ ), 67.8 ( $\text{C}_q$ ), 62.0 ( $\text{CH}_3$ ), 55.2 ( $\text{CH}_3$ ), 49.9 ( $\text{CH}_3$ ), 45.8 ( $\text{CH}_2$ ), 38.8 ( $\text{CH}_2$ ), 13.5 ( $\text{CH}_3$ );\* **IR** (KBr):  $\tilde{\nu}$  ( $\text{cm}^{-1}$ ) = 3464, 3064, 2943, 2895, 1670, 1604, 1586, 1567, 1509, 1473, 1462, 1402, 1339, 1327, 1294, 1248, 1201, 1178, 1165, 1130, 1107, 1064, 1036, 948, 768, 751, 726, 698; **HR-MS** (ESI<sup>+</sup>): calcd. for  $\text{C}_{29}\text{H}_{30}\text{N}_2\text{O}_4\text{Na}$  ( $[\text{M}+\text{Na}]^+$ ): 493.2098, found: 493.2097; **M**( $\text{C}_{29}\text{H}_{30}\text{N}_2\text{O}_4$ ): 470.57.

### Tetrahydroindeno[2,1-*b*]pyrrole 3j

According to general procedure 2, 2-hydroxy oxime ether **1j** (60 mg, 0.20 mmol, 1.0 equiv), methyl acetoacetate (28  $\mu\text{L}$ , 0.26 mmol, 1.3 equiv),  $\text{Sc}(\text{OTf})_3$  (9.8 mg, 20  $\mu\text{mol}$ , 0.10 equiv) and 4 Å molecular sieve (50 mg) were dissolved in abs.  $\text{CHCl}_3$  (1.0 mL) and the reaction mixture was heated to 60 °C for 5 h. Benzylamine (44  $\mu\text{L}$ , 0.40 mmol, 2.0 equiv) was added and it was stirred at 60 °C for 2 days. Compound **3j** was obtained as a colorless solid (93 mg, 96%).

\* One  $^{13}\text{C}$ -signal is very broad and could not be clearly detected.

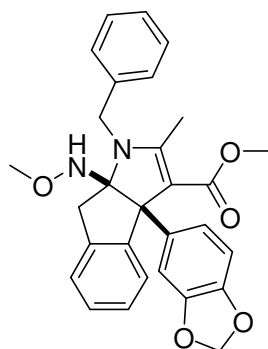

**R<sub>f</sub>**: 0.28 (30% MTBE/hexane); **mp.**: 164 – 166 °C; **<sup>1</sup>H-NMR** (300 MHz, CDCl<sub>3</sub>): δ (ppm) = 7.65 – 7.62 (m, 1H), 7.28 – 7.16 (m, 7H), 7.07 – 7.05 (m, 1H), 6.95 – 6.91 (m, 2H), 6.69 – 6.64 (m, 1H), 5.92 (s, 2H), 5.24 (bs, 1H), 4.79 (d, *J* = 17.5 Hz, 1H), 4.63 (d, *J* = 17.5 Hz, 1H), 3.62 (s, 3H), 3.33 (s, 3H), 3.01 (d, *J* = 16.5 Hz, 1H), 2.93 (d, *J* = 16.5 Hz, 1H), 2.22 (s, 3H); **<sup>13</sup>C-NMR** (75 MHz, CDCl<sub>3</sub>): δ (ppm) = 167.1 (C=O), 162.5 (C<sub>q</sub>), 148.1 (C<sub>q</sub>), 147.1 (C<sub>q</sub>), 146.3 (C<sub>q</sub>), 139.3 (C<sub>q</sub>), 138.6 (C<sub>q</sub>), 133.8 (C<sub>q</sub>), 128.7 (2x CH), 128.1 (CH), 127.4 (CH), 127.0 (2x CH), 125.7 (2x CH), 123.8 (CH), 107.2 (CH), 102.4 (C<sub>q</sub>), 100.9 (C<sub>q</sub>), 98.4 (C<sub>q</sub>), 68.2 (C<sub>q</sub>), 62.1 (CH<sub>3</sub>), 50.0 (CH<sub>3</sub>), 45.9 (CH<sub>2</sub>), 38.8 (CH<sub>2</sub>), 13.5 (CH<sub>3</sub>);\* **IR** (KBr):  $\tilde{\nu}$  (cm<sup>-1</sup>) = 3443, 3028, 2943, 2895, 1667, 1587, 1568, 1502, 1487, 1434, 1402, 1336, 1326, 1245, 1165, 1122, 1086, 1038, 937, 808, 752, 735; **HR-MS** (ESI<sup>+</sup>): calcd. for C<sub>29</sub>H<sub>28</sub>N<sub>2</sub>O<sub>5</sub>Na ([M+Na]<sup>+</sup>): 507.1890, found: 507.1894; **M**(C<sub>29</sub>H<sub>28</sub>N<sub>2</sub>O<sub>5</sub>): 484.55.

### Tetrahydroindeno[2,1-*b*]pyrrole 3k

According to general procedure 2, 2-hydroxy oxime ether **1k** (59 mg, 0.20 mmol, 1.0 equiv), methyl acetoacetate (28 μL, 0.26 mmol, 1.3 equiv), Sc(OTf)<sub>3</sub> (9.8 mg, 20 μmol, 0.10 equiv) and 4 Å molecular sieve (50 mg) were dissolved in abs. CHCl<sub>3</sub> (1.0 mL) and the reaction mixture was heated to 60 °C for 3 h. Benzylamine (44 μL, 0.40 mmol, 2.0 equiv) was added and it was stirred at 60 °C for 3 days. Compound **3k** was obtained as a brown solid (45 mg, 46%).

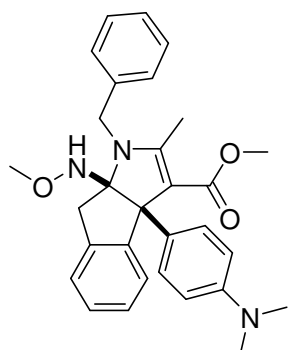

**R<sub>f</sub>**: 0.41 (50% MTBE/hexane); **mp.**: 171 – 173 °C; **<sup>1</sup>H-NMR** (300 MHz, CDCl<sub>3</sub>): δ (ppm) = 7.64 – 7.62 (m, 1H), 7.27 – 7.17 (m, 7H), 7.08 – 7.06 (m, 1H), 6.97 – 6.94 (m, 2H), 6.64 – 6.60 (m, 2H), 5.20 (bs, 1H), 4.79 (d, *J* = 17.5 Hz, 1H), 4.65 (d, *J* = 17.5 Hz, 1H), 3.60 (s, 3H), 3.31 (s, 3H), 3.03 (d, *J* = 16.5 Hz, 1H), 2.94 (d, *J* = 16.5 Hz, 1H), 2.93 (s, 6H), 2.24 (s, 3H); **<sup>13</sup>C-NMR** (75 MHz, CDCl<sub>3</sub>): δ (ppm) = 167.4 (C=O), 162.5 (C<sub>q</sub>), 149.3 (C<sub>q</sub>), 148.6 (C<sub>q</sub>), 139.5 (C<sub>q</sub>), 138.8 (C<sub>q</sub>), 128.6 (2x CH), 127.9 (CH), 127.3 (C<sub>q</sub>), 127.1 (CH), 127.0 (CH), 126.9 (CH), 125.8 (2x CH), 123.6 (CH), 111.7 (2x CH), 102.4 (C<sub>q</sub>), 96.4 (C<sub>q</sub>), 67.8 (C<sub>q</sub>), 62.0 (CH<sub>3</sub>), 50.0 (CH<sub>3</sub>), 46.0 (CH<sub>2</sub>), 40.7 (2x CH<sub>3</sub>), 39.0 (CH<sub>2</sub>), 13.5 (CH<sub>3</sub>);\*\* **IR** (KBr):  $\tilde{\nu}$  (cm<sup>-1</sup>) = 3444, 3064, 2943, 2803, 1670, 1613, 1587, 1574, 1519, 1401, 1354, 1339, 1200, 1165, 1121, 948, 809, 758, 743; **HR-MS** (ESI<sup>+</sup>): calcd. for C<sub>30</sub>H<sub>33</sub>N<sub>3</sub>O<sub>3</sub>Na ([M+Na]<sup>+</sup>): 506.2414, found: 506.2410; **M**(C<sub>30</sub>H<sub>33</sub>N<sub>3</sub>O<sub>3</sub>): 483.61.

\* Two <sup>13</sup>C-signals are very broad and could not be clearly detected.

\*\* One <sup>13</sup>C-signal is very broad and could not be clearly detected.

### Tetrahydroindeno[2,1-*b*]pyrrole 3l

According to [general procedure 2](#), 2-hydroxy oxime ether **1l** (61 mg, 0.20 mmol, 1.0 equiv), methyl acetoacetate (28  $\mu$ L, 0.26 mmol, 1.3 equiv), Sc(OTf)<sub>3</sub> (9.8 mg, 20  $\mu$ mol, 0.10 equiv) and 4 Å molecular sieve (50 mg) were dissolved in abs. CHCl<sub>3</sub> (1.0 mL) and the reaction mixture was heated to 60 °C for 3 h. Benzylamine (44  $\mu$ L, 0.40 mmol, 2.0 equiv) was added and it was stirred at 60 °C for 2 days. Compound **3l** was obtained as a colorless solid (92 mg, 94%).

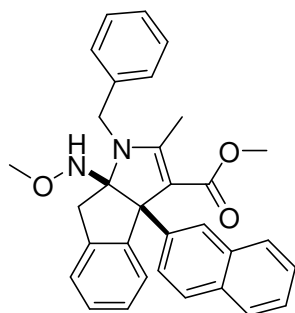

**R<sub>f</sub>**: 0.21 (20% MTBE/hexane); **mp.**: 182 – 184 °C; **<sup>1</sup>H-NMR** (400 MHz, CDCl<sub>3</sub>):  $\delta$  (ppm) = 7.83 – 7.81 (m, 1H), 7.75 – 7.72 (m, 2H), 7.68 – 7.65 (m, 2H), 7.45 – 7.38 (m, 3H), 7.33 – 7.28 (m, 2H), 7.23 – 7.19 (m, 3H), 7.16 – 7.12 (m, 1H), 6.98 – 6.95 (m, 2H), 5.15 (bs, 1H), 4.84 (d,  $J$  = 18.0 Hz, 1H), 4.68 (d,  $J$  = 18.0 Hz, 1H), 3.57 (s, 3H), 3.25 (bs, 3H), 3.08 (d,  $J$  = 16.5 Hz, 1H), 2.99 (d,  $J$  = 16.5 Hz, 1H), 2.31 (s, 3H); **<sup>13</sup>C-NMR** (100 MHz, CDCl<sub>3</sub>):  $\delta$  (ppm) = 167.3 (C=O), 163.0 (C<sub>q</sub>), 148.3 (C<sub>q</sub>), 139.3 (C<sub>q</sub>), 133.1 (C<sub>q</sub>), 132.7 (C<sub>q</sub>), 128.7 (2x CH), 128.2 (CH), 127.5 (2x CH), 127.0 (2x CH), 126.4 (CH), 125.7 (2x CH), 125.6 (CH), 125.5 (CH), 123.9 (CH), 102.2 (C<sub>q</sub>), 96.8 (C<sub>q</sub>), 68.5 (C<sub>q</sub>), 62.0 (CH<sub>3</sub>), 49.9 (CH<sub>3</sub>), 45.8 (CH<sub>2</sub>), 38.9 (CH<sub>2</sub>), 13.5 (CH<sub>3</sub>);\* **IR** (KBr):  $\tilde{\nu}$  (cm<sup>-1</sup>) = 3443, 3059, 2943, 1671, 1588, 1570, 1418, 1403, 1336, 1325, 1191, 1165, 1134, 1103, 748; **HR-MS** (ESI<sup>+</sup>): calcd. for C<sub>32</sub>H<sub>30</sub>N<sub>2</sub>O<sub>3</sub>Na ([M+Na]<sup>+</sup>): 513.2149, found: 513.2148.

**M(C<sub>32</sub>H<sub>30</sub>N<sub>2</sub>O<sub>3</sub>)**: 490.60.

### Tetrahydroindeno[2,1-*b*]pyrrole 3m

According to [general procedure 2](#), 2-hydroxy oxime ether **1m** (52 mg, 0.20 mmol, 1.0 equiv), methyl acetoacetate (28  $\mu$ L, 0.26 mmol, 1.3 equiv), Sc(OTf)<sub>3</sub> (9.8 mg, 20  $\mu$ mol, 0.10 equiv) and 4 Å molecular sieve (50 mg) were dissolved in abs. CHCl<sub>3</sub> (1.0 mL) and the reaction mixture was heated to 60 °C for 3 h. Benzylamine (44  $\mu$ L, 0.40 mmol, 2.0 equiv) was added and it was stirred at 60 °C for 3 days. Compound **3m** was obtained as a dark violet solid (59 mg, 66%).

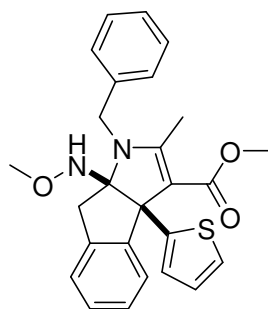

**R<sub>f</sub>**: 0.29 (30% MTBE/hexane); **mp.**: 155 – 157 °C; **<sup>1</sup>H-NMR** (300 MHz, CDCl<sub>3</sub>):  $\delta$  (ppm) = 7.76 – 7.73 (m, 1H), 7.28 – 7.18 (m, 6H), 7.10 – 7.07 (m, 1H), 7.01 – 6.94 (m, 3H), 6.78 – 6.75 (m, 1H), 5.46 (bs, 1H), 4.77 (d,  $J$  = 17.5 Hz, 1H), 4.67 (d,  $J$  = 17.5 Hz, 1H), 3.61 (s, 3H), 3.36

\* Five <sup>13</sup>C-signals are very broad and could not be clearly detected.

(s, 3H), 3.15 (d,  $J = 16.5$  Hz, 1H), 3.05 (d,  $J = 16.5$  Hz, 1H), 2.23 (s, 3H);  **$^{13}\text{C-NMR}$**  (75 MHz,  $\text{CDCl}_3$ ):  $\delta$  (ppm) = 166.8 (C=O), 162.1 ( $\text{C}_q$ ), 147.4 ( $\text{C}_q$ ), 145.3 ( $\text{C}_q$ ), 139.2 ( $\text{C}_q$ ), 138.7 ( $\text{C}_q$ ), 128.7 (2x CH), 127.7 (CH), 127.6 (CH), 127.4 (CH), 127.01 (CH), 126.96 (CH), 126.6 (CH), 125.8 (2x CH), 124.6 (CH), 123.7 (CH), 103.3 ( $\text{C}_q$ ), 96.4 ( $\text{C}_q$ ), 65.4 ( $\text{C}_q$ ), 62.4 ( $\text{CH}_3$ ), 50.0 ( $\text{CH}_3$ ), 46.2 ( $\text{CH}_2$ ), 39.0 ( $\text{CH}_2$ ), 13.4 ( $\text{CH}_3$ ); **IR** (KBr):  $\tilde{\nu}$  ( $\text{cm}^{-1}$ ) = 3446, 3268, 3024, 2986, 2949, 2934, 2895, 1660, 1585, 1563, 1494, 1478, 1459, 1446, 1433, 1419, 1402, 1360, 1330, 1294, 1239, 1200, 1181, 1166, 1122, 1100, 1080, 1065, 1044, 1029, 933, 814, 765, 753, 735, 720, 699, 474; **HR-MS** (ESI<sup>+</sup>): calcd. for  $\text{C}_{26}\text{H}_{26}\text{N}_2\text{O}_3\text{SNa}$  ( $[\text{M}+\text{Na}]^+$ ): 469.1556, found: 469.1553; **M**( $\text{C}_{26}\text{H}_{26}\text{N}_2\text{O}_3\text{S}$ ): 446.57.

### Tetrahydroindeno[2,1-*b*]pyrrole 3n

According to [general procedure 2](#), 2-hydroxy oxime ether **1n** (58 mg, 0.20 mmol, 1.0 equiv), methyl acetoacetate (28  $\mu\text{L}$ , 0.26 mmol, 1.3 equiv),  $\text{Sc}(\text{OTf})_3$  (9.8 mg, 20  $\mu\text{mol}$ , 0.10 equiv) and 4 Å molecular sieve (50 mg) were dissolved in abs.  $\text{CHCl}_3$  (1.0 mL) and the reaction mixture was heated to 60 °C for 20 h. Benzylamine (44  $\mu\text{L}$ , 0.40 mmol, 2.0 equiv) was added and it was stirred at 60 °C for 2 days. Compound **3n** was obtained as a colorless solid (95 mg, >99%).

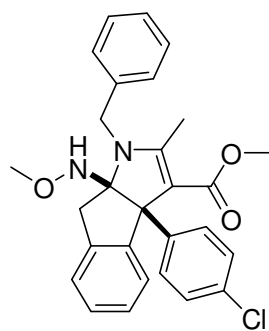

**R<sub>f</sub>**: 0.24 (20% MTBE/hexane); **mp.**: 61 – 63 °C;  **$^1\text{H-NMR}$**  (300 MHz,  $\text{CDCl}_3$ ):  $\delta$  (ppm) = 7.62 – 7.59 (m, 1H), 7.33 – 7.16 (m, 9H), 7.09 – 7.07 (m, 1H), 6.94 – 6.91 (m, 2H), 5.16 (bs, 1H), 4.80 (d,  $J = 18.0$  Hz, 1H), 4.63 (d,  $J = 18.0$  Hz, 1H), 3.60 (s, 3H), 3.28 (s, 3H), 3.03 (d,  $J = 16.5$  Hz, 1H), 2.90 (d,  $J = 16.5$  Hz, 1H), 2.25 (s, 3H);  **$^{13}\text{C-NMR}$**  (75 MHz,  $\text{CDCl}_3$ ):  $\delta$  (ppm) = 167.0 (C=O), 162.9 ( $\text{C}_q$ ), 147.9 ( $\text{C}_q$ ), 139.1 ( $\text{C}_q$ ), 138.5 ( $\text{C}_q$ ), 138.4 ( $\text{C}_q$ ), 132.4 ( $\text{C}_q$ ), 128.7 (2x CH), 128.2 (CH), 127.6 (CH), 127.5 (2x CH), 127.0 (CH), 126.8 (CH), 125.7 (2x CH), 123.9 (CH), 101.8 ( $\text{C}_q$ ), 96.6 ( $\text{C}_q$ ), 67.9 ( $\text{C}_q$ ), 62.0 ( $\text{CH}_3$ ), 49.9 ( $\text{CH}_3$ ), 45.7 ( $\text{CH}_2$ ), 38.7 ( $\text{CH}_2$ ), 13.5 ( $\text{CH}_3$ );\* **IR** (KBr):  $\tilde{\nu}$  ( $\text{cm}^{-1}$ ) = 3441, 3220, 3064, 3028, 2943, 2897, 1665, 1577, 1490, 1475, 1419, 1401, 1361, 1340, 1326, 1295, 1270, 1201, 1184, 1166, 1130, 1104, 1092, 1063, 1038, 1028, 1015, 950, 943, 930, 908, 811, 754, 733, 710, 696, 456; **HR-MS** (ESI<sup>+</sup>): calcd. for  $\text{C}_{28}\text{H}_{27}^{35}\text{ClN}_2\text{O}_3\text{Na}$  ( $[\text{M}+\text{Na}]^+$ ): 497.1602, found: 497.1600; **M**( $\text{C}_{28}\text{H}_{27}\text{ClN}_2\text{O}_3$ ): 474.99.

### Tetrahydroindeno[2,1-*b*]pyrrole 3o

According to [general procedure 2](#), 2-hydroxy oxime ether **1o** (54 mg, 0.20 mmol, 1.0 equiv), methyl acetoacetate (28  $\mu\text{L}$ , 0.26 mmol, 1.3 equiv),  $\text{Sc}(\text{OTf})_3$  (9.8 mg, 20  $\mu\text{mol}$ , 0.10 equiv)

\* One  $^{13}\text{C}$ -signal is very broad and could not be clearly detected.



and 4 Å molecular sieve (50 mg) were dissolved in abs.  $\text{CHCl}_3$  (1.0 mL) and the reaction mixture was heated to 60 °C for 5 h. Benzylamine (44  $\mu\text{L}$ , 0.40 mmol, 2.0 equiv) was added and it was stirred at 60 °C for 2 days. Compound **3o** was obtained as a colorless solid (85 mg, 93%).

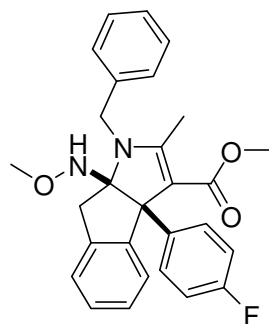

**R<sub>f</sub>**: 0.28 (20% MTBE/hexane); **mp.**: 119 – 121 °C; **<sup>1</sup>H-NMR** (400 MHz,  $\text{CDCl}_3$ ):  $\delta$  (ppm) = 7.64 – 7.62 (m, 1H), 7.31 – 7.19 (m, 7H), 7.11 – 7.09 (m, 1H), 6.98 – 6.93 (m, 4H), 5.17 (bs, 1H), 4.82 (d,  $J$  = 17.5 Hz, 1H), 4.66 (d,  $J$  = 17.5 Hz, 1H), 3.62 (s, 3H), 3.31 (s, 3H), 3.05 (d,  $J$  = 16.5 Hz, 1H), 2.93 (d,  $J$  = 16.5 Hz, 1H), 2.27 (s, 3H); **<sup>13</sup>C-NMR** (100 MHz,  $\text{CDCl}_3$ ):  $\delta$  (ppm) = 167.1 (C=O), 162.8 ( $\text{C}_q$ ), 161.8 (d,  $J$  = 245.0 Hz,  $\text{C}_q$ ), 148.1 ( $\text{C}_q$ ), 139.2 ( $\text{C}_q$ ), 138.4 ( $\text{C}_q$ ), 135.5 (d,  $J$  = 3.0 Hz,  $\text{C}_q$ ), 128.7 (2x CH), 128.2 (CH), 127.5 (CH), 127.0 (CH), 126.8 (CH), 125.7 (2x CH), 123.8 (CH), 114.1 (d,  $J$  = 21.0 Hz, 2x CH), 102.1 ( $\text{C}_q$ ), 96.5 ( $\text{C}_q$ ), 67.8 ( $\text{C}_q$ ), 62.0 ( $\text{CH}_3$ ), 49.9 ( $\text{CH}_3$ ), 45.7 ( $\text{CH}_2$ ), 38.7 ( $\text{CH}_2$ ), 13.5 ( $\text{CH}_3$ );\* **<sup>19</sup>F-NMR** (375 MHz,  $\text{CDCl}_3$ ):  $\delta$  (ppm) = –116.9; **IR** (KBr):  $\tilde{\nu}$  ( $\text{cm}^{-1}$ ) = 3446, 3194, 3062, 2945, 2899, 1670, 1643, 1601, 1587, 1568, 1507, 1471, 1454, 1403, 1342, 1326, 1223, 1214, 1202, 1186, 1160, 1129, 1092, 1039, 1017, 952, 828, 815, 768, 748, 734, 698; **HR-MS** (ESI<sup>+</sup>): calcd. for  $\text{C}_{28}\text{H}_{27}\text{FN}_2\text{O}_3\text{Na}$  ( $[\text{M}+\text{Na}]^+$ ): 481.1898, found: 481.1899; **M**( $\text{C}_{28}\text{H}_{27}\text{FN}_2\text{O}_3$ ): 458.53.

### Tetrahydroindeno[2,1-*b*]pyrrole **3p**

According to general procedure 2, 2-hydroxy oxime ether **1p** (64 mg, 0.20 mmol, 1.0 equiv), methyl acetoacetate (28  $\mu\text{L}$ , 0.26 mmol, 1.3 equiv),  $\text{Sc}(\text{OTf})_3$  (9.8 mg, 20  $\mu\text{mol}$ , 0.10 equiv) and 4 Å molecular sieve (50 mg) were dissolved in abs.  $\text{CHCl}_3$  (1.0 mL) and the reaction mixture was heated to 60 °C for 51 h. Benzylamine (44  $\mu\text{L}$ , 0.40 mmol, 2.0 equiv) was added and it was stirred at 60 °C for 5 days. Compound **3p** was obtained as a colorless solid (96 mg, 94%).

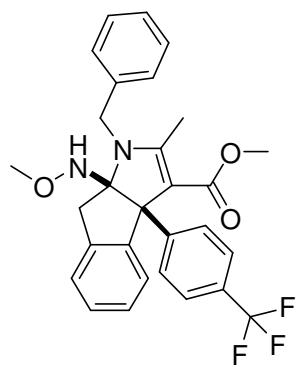

**R<sub>f</sub>**: 0.27 (20% MTBE/hexane); **mp.**: 50 – 52 °C; **<sup>1</sup>H-NMR** (400 MHz,  $\text{CDCl}_3$ ):  $\delta$  (ppm) = 7.64 – 7.62 (m, 1H), 7.52 – 7.49 (m, 2H), 7.33 – 7.21 (m, 7H), 7.14 – 7.10 (m, 1H), 6.97 – 6.95 (m, 2H), 5.16 (bs, 1H), 4.83 (d,  $J$  = 18.0 Hz, 1H), 4.67 (d,  $J$  = 18.0 Hz, 1H), 3.63 (s, 3H), 3.29 (s, 3H), 3.07 (d,  $J$  = 17.0 Hz, 1H), 2.94 (d,  $J$  = 17.0 Hz, 1H), 2.29 (s, 3H); **<sup>13</sup>C-NMR** (100 MHz,  $\text{CDCl}_3$ ):  $\delta$  (ppm) = 166.9 (C=O), 163.0 ( $\text{C}_q$ ), 147.7 ( $\text{C}_q$ ), 144.3 ( $\text{C}_q$ ), 139.0 ( $\text{C}_q$ ), 138.4 ( $\text{C}_q$ ), 128.8 (2x CH), 128.7 (q,  $J$  = 32.5 Hz,  $\text{C}_q$ ), 128.4 (CH), 127.8 (CH), 127.1 (CH), 126.8 (CH), 125.6 (2x CH), 124.6 (q,  $J$  = 271.5 Hz,  $\text{C}_q$ ), 124.2 (2x CH), 124.0

\* One <sup>13</sup>C-signal is very broad and could not be clearly detected.

(CH), 101.7 (C<sub>q</sub>), 96.8 (C<sub>q</sub>), 68.2 (C<sub>q</sub>), 62.0 (CH<sub>3</sub>), 50.0 (CH<sub>3</sub>), 45.6 (CH<sub>2</sub>), 38.7 (CH<sub>2</sub>), 13.5 (CH<sub>3</sub>);\* **<sup>19</sup>F-NMR** (375 MHz, CDCl<sub>3</sub>): δ (ppm) = −62.2; **IR** (KBr):  $\tilde{\nu}$  (cm<sup>−1</sup>) = 3434, 3206, 3066, 2944, 1670, 1587, 1569, 1475, 1409, 1326, 1298, 1291, 1203, 1164, 1129, 1068, 1038, 1019, 946, 930, 831, 766, 752, 733, 698; **HR-MS** (ESI<sup>+</sup>): calcd. for C<sub>29</sub>H<sub>27</sub>F<sub>3</sub>N<sub>2</sub>O<sub>3</sub>Na ([M+Na]<sup>+</sup>): 531.1866, found: 531.1868; **M**(C<sub>29</sub>H<sub>27</sub>F<sub>3</sub>N<sub>2</sub>O<sub>3</sub>): 508.54.

### Tetrahydroindeno[2,1-*b*]pyrrole 3q

According to general procedure 2, 2-hydroxy oxime ether **1q** (78 mg, 0.20 mmol, 1.0 equiv), methyl acetoacetate (28 μL, 0.26 mmol, 1.3 equiv), Sc(OTf)<sub>3</sub> (9.8 mg, 20 μmol, 0.10 equiv) and 4 Å molecular sieve (50 mg) were dissolved in abs. CHCl<sub>3</sub> (1.0 mL) and the reaction mixture was heated to 60 °C for 18 h. Benzylamine (44 μL, 0.40 mmol, 2.0 equiv) was added and it was stirred at 60 °C for 6 days. Compound **3q** was obtained as a colorless solid (111 mg, 96%).

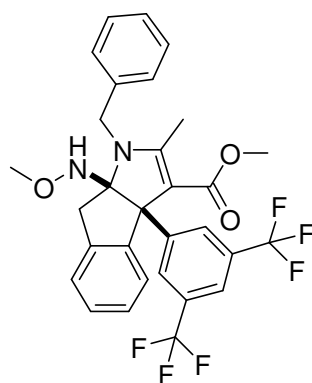

**R<sub>f</sub>**: 0.23 (20% MTBE/hexane); **mp.**: 186 – 187 °C; **<sup>1</sup>H-NMR** (300 MHz, CDCl<sub>3</sub>): δ (ppm) = 7.73 (s, 1H), 7.56 – 7.53 (m, 1H), 7.31 – 7.28 (m, 2H), 7.22 – 7.18 (m, 3H), 7.12 – 7.10 (m, 1H), 6.94 – 6.92 (m, 2H), 5.07 (bs, 1H), 4.78 (d, *J* = 18.0 Hz, 1H), 4.63 (d, *J* = 18.0 Hz, 1H), 3.58 (s, 3H), 3.20 (s, 3H), 3.04 (d, *J* = 17.0 Hz, 1H), 2.88 (d, *J* = 17.0 Hz, 1H), 2.29 (s, 3H);\*\* **<sup>13</sup>C-NMR** (100 MHz, CDCl<sub>3</sub>): δ (ppm) = 166.6 (C=O), 163.6 (C<sub>q</sub>), 146.8 (C<sub>q</sub>), 143.5 (C<sub>q</sub>), 138.7 (C<sub>q</sub>), 138.1 (C<sub>q</sub>), 130.4 (q, *J* = 33.0 Hz, C<sub>q</sub>), 128.84 (2x CH), 128.8 (CH), 128.3 (CH), 127.2 (CH), 126.5 (CH), 125.6 (2x CH), 124.2 (CH), 123.8 (q, *J* = 272.5 Hz, C<sub>q</sub>), 120.5 (m, CH), 101.0 (C<sub>q</sub>), 96.9 (C<sub>q</sub>), 68.2 (C<sub>q</sub>), 61.8 (CH<sub>3</sub>), 50.0 (CH<sub>3</sub>), 45.4 (CH<sub>2</sub>), 38.6 (CH<sub>2</sub>), 13.6 (CH<sub>3</sub>);\* **<sup>19</sup>F-NMR** (375 MHz, CDCl<sub>3</sub>): δ (ppm) = −62.6; **IR** (KBr):  $\tilde{\nu}$  (cm<sup>−1</sup>) = 3443, 3214, 3030, 2946, 2903, 1665, 1637, 1587, 1567, 1471, 1410, 1372, 1340, 1278, 1202, 1176, 1133, 1107, 1038, 744, 681; **HR-MS** (ESI<sup>+</sup>): calcd. for C<sub>30</sub>H<sub>27</sub>F<sub>6</sub>N<sub>2</sub>O<sub>3</sub> ([M+H]<sup>+</sup>): 577.1920, found: 577.1920; **M**(C<sub>30</sub>H<sub>26</sub>F<sub>6</sub>N<sub>2</sub>O<sub>3</sub>): 576.54.

### Tetrahydroindeno[2,1-*b*]pyrrole 3r

According to general procedure 2, 2-hydroxy oxime ether **1r** (47 mg, 0.20 mmol, 1.0 equiv), methyl acetoacetate (28 μL, 0.26 mmol, 1.3 equiv), Sc(OTf)<sub>3</sub> (9.8 mg, 20 μmol, 0.10 equiv) and 4 Å molecular sieve (50 mg) were dissolved in abs. CHCl<sub>3</sub> (1.0 mL) and the reaction mixture was heated to 60 °C for 23 h. Benzylamine (44 μL, 0.40 mmol, 2.0 equiv) was added

\* One <sup>13</sup>C-signal is very broad and could not be clearly detected.

\*\* One <sup>1</sup>H-signal is very broad and could not be clearly detected.

and it was stirred at 60 °C for 2.5 days. Compound **3r** was obtained as a colorless oil (24 mg, 29%).

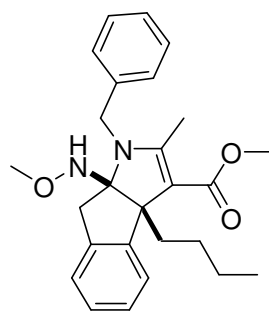

**R<sub>f</sub>**: 0.35 (20% MTBE/hexane); **<sup>1</sup>H-NMR** (400 MHz, CDCl<sub>3</sub>): δ (ppm) = 7.75 (d', *J* = 7.5 Hz, 1H), 7.30 – 7.24 (m, 2H), 7.19 – 7.17 (m, 3H), 6.99 (d', *J* = 7.5 Hz, 1H), 6.90 – 6.87 (m, 2H), 6.10 (bs, 1H), 4.88 (d, *J* = 18.0 Hz, 1H), 4.61 (d, *J* = 18.0 Hz, 1H), 3.77 (s, 3H), 3.59 (s, 3H), 3.05 (s, 2H), 2.69 – 2.61 (m, 1H), 2.14 – 2.02 (m, 4H), 1.34 – 1.25 (m, 3H), 1.01 – 0.88 (m, 1H), 0.86 (t, *J* = 7.0 Hz, 3H); **<sup>13</sup>C-NMR** (100 MHz, CDCl<sub>3</sub>): δ (ppm) = 167.5 (C=O), 160.6 (C<sub>q</sub>), 148.8 (C<sub>q</sub>), 139.4 (C<sub>q</sub>), 137.8 (C<sub>q</sub>), 128.6 (2x CH), 127.7 (CH), 126.9 (CH), 126.8 (CH), 125.6 (2x CH), 125.5 (CH), 123.7 (CH), 102.3 (C<sub>q</sub>), 95.2 (C<sub>q</sub>), 62.9 (C<sub>q</sub>), 62.8 (CH<sub>3</sub>), 50.0 (CH<sub>3</sub>), 45.7 (CH<sub>2</sub>), 39.7 (CH<sub>2</sub>), 32.5 (CH<sub>2</sub>), 27.9 (CH<sub>2</sub>), 23.7 (CH<sub>2</sub>), 14.2 (CH<sub>3</sub>), 13.7 (CH<sub>3</sub>); **IR** (film):  $\tilde{\nu}$  (cm<sup>-1</sup>) = 3065, 3009, 2953, 2869, 2859, 1739, 1723, 1655, 1587, 1568, 1495, 1464, 1434, 1407, 1361, 1341, 1295, 1184, 1172, 1152, 1072, 1045, 1028, 755, 735, 697; **HR-MS** (ESI<sup>+</sup>): calcd. for C<sub>26</sub>H<sub>32</sub>N<sub>2</sub>O<sub>3</sub>Na ([M+Na]<sup>+</sup>): 443.2305, found: 443.2306; **M**(C<sub>26</sub>H<sub>32</sub>N<sub>2</sub>O<sub>3</sub>): 420.55.

### Tetrahydroindeno[2,1-*b*]pyrrole **3s**

According to general procedure 2, 2-hydroxy oxime ether **1s** (44 mg, 0.20 mmol, 1.0 equiv), methyl acetoacetate (28 μL, 0.26 mmol, 1.3 equiv), Sc(OTf)<sub>3</sub> (9.8 mg, 20 μmol, 0.10 equiv) and 4 Å molecular sieve (50 mg) were dissolved in abs. CHCl<sub>3</sub> (1.0 mL) and the reaction mixture stirred at room temperature for 40 h as well as at 60 °C for 25 h. Benzylamine (44 μL, 0.40 mmol, 2.0 equiv) was added and it was stirred at 60 °C for 3 days. Compound **3s** was obtained as a colorless solid (24 mg, 29%).

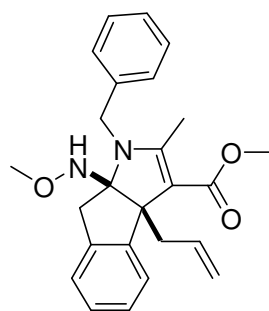

**R<sub>f</sub>**: 0.38 (20% MTBE/hexane); **mp.**: 78 – 80 °C; **<sup>1</sup>H-NMR** (300 MHz, CDCl<sub>3</sub>): δ (ppm) = 7.75 (d, *J* = 7.5 Hz, 1H), 7.28 – 7.23 (m, 1H), 7.19 – 7.14 (m, 4H), 6.97 (d, *J* = 7.5 Hz, 1H), 6.90 – 6.87 (m, 2H), 6.54 (bs, 1H), 5.58 (dtd, *J* = 17.0, 10.0, 5.0 Hz, 1H), 5.26 (dt, *J* = 17.0, 2.5 Hz, 1H), 4.96 (dt, *J* = 10.0, 2.0 Hz, 1H), 4.86 (d, *J* = 18.0 Hz, 1H), 4.55 (d, *J* = 18.0 Hz, 1H), 3.75 (s, 3H), 3.61 – 3.55 (m, 4H), 3.06 (dd, *J* = 15.0, 9.5 Hz, 1H), 2.95 (d, *J* = 16.5 Hz, 1H), 2.78 (d, *J* = 16.5 Hz, 1H), 2.12 (s, 3H); **<sup>13</sup>C-NMR** (75 MHz, CDCl<sub>3</sub>): δ (ppm) = 167.4 (C=O), 161.4 (C<sub>q</sub>), 148.3 (C<sub>q</sub>), 139.4 (C<sub>q</sub>), 138.0 (CH), 137.5 (C<sub>q</sub>), 128.7 (2x CH), 127.9 (CH), 127.2 (CH), 126.9 (CH), 125.6 (2x CH), 125.4 (CH), 123.8 (CH), 116.4 (CH<sub>2</sub>), 102.3 (C<sub>q</sub>), 95.7 (C<sub>q</sub>), 62.8 (CH<sub>3</sub>), 61.5 (C<sub>q</sub>), 50.0 (CH<sub>3</sub>), 45.1 (CH<sub>2</sub>), 39.8 (CH<sub>2</sub>), 38.3 (CH<sub>2</sub>), 13.6 (CH<sub>3</sub>); **IR** (KBr):  $\tilde{\nu}$  (cm<sup>-1</sup>) = 3434, 3065, 2946, 2900, 1727, 1664, 1586, 1571, 1495, 1477, 1455, 1436, 1409, 1342, 1184, 1170, 1068,

1043, 758, 736, 699; **HR-MS** (ESI<sup>+</sup>): calcd. for C<sub>25</sub>H<sub>29</sub>N<sub>2</sub>O<sub>3</sub> ([M+H]<sup>+</sup>): 405.2173, found: 405.2175; **M**(C<sub>25</sub>H<sub>28</sub>N<sub>2</sub>O<sub>3</sub>): 404.51.

### Tetrahydroindeno[2,1-*b*]pyrrole 3t

According to general procedure 2, 2-hydroxy oxime ether **1t** (38 mg, 0.20 mmol, 1.0 equiv), methyl acetoacetate (28  $\mu$ L, 0.26 mmol, 1.3 equiv), Sc(OTf)<sub>3</sub> (9.8 mg, 20  $\mu$ mol, 0.10 equiv) and 4 Å molecular sieve (50 mg) were dissolved in abs. CHCl<sub>3</sub> (1.0 mL) and the reaction mixture stirred at room temperature for 40 h as well as at 60 °C for 25 h. Benzylamine (44  $\mu$ L, 0.40 mmol, 2.0 equiv) was added and it was stirred at 60 °C for 3 days. Compound **3t** was obtained as a colorless solid (38 mg, 50%).

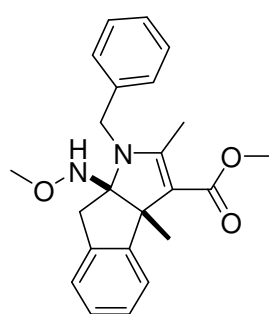

**R<sub>f</sub>**: 0.13 (30% MTBE/hexane); **mp.**: 68 – 70 °C; **<sup>1</sup>H-NMR** (300 MHz, CDCl<sub>3</sub>):  $\delta$  (ppm) = 7.71 (d', *J* = 7.5 Hz, 1H), 7.27 – 7.12 (m, 5H), 6.95 (d, *J* = 7.5 Hz, 1H), 6.89 – 6.87 (m, 2H), 6.03 (bs, 1H), 4.83 (d, *J* = 18.0 Hz, 1H), 4.58 (d, *J* = 18.0 Hz, 1H), 3.77 (s, 3H), 3.55 (s, 3H), 2.99 (d, *J* = 16.5 Hz, 1H), 2.89 (d, *J* = 16.5 Hz, 1H), 2.14 (s, 3H), 1.71 (s, 3H); **<sup>13</sup>C-NMR** (75 MHz, CDCl<sub>3</sub>):  $\delta$  (ppm) = 167.5 (C=O), 161.0 (C<sub>q</sub>), 150.5 (C<sub>q</sub>), 139.4 (C<sub>q</sub>), 136.4 (C<sub>q</sub>), 128.7 (2x CH), 127.8 (CH), 127.0 (CH), 126.9 (CH), 125.6 (2x CH), 125.1 (CH), 123.9 (CH), 103.3 (C<sub>q</sub>), 95.5 (C<sub>q</sub>), 62.7 (CH<sub>3</sub>), 58.8 (C<sub>q</sub>), 50.0 (CH<sub>3</sub>), 45.3 (CH<sub>2</sub>), 38.2 (CH<sub>2</sub>), 19.9 (CH<sub>3</sub>), 13.4 (CH<sub>3</sub>); **IR** (KBr):  $\tilde{\nu}$  (cm<sup>-1</sup>) = 3465, 3025, 2976, 2943, 2901, 1660, 1587, 1572, 1476, 1460, 1433, 1404, 1341, 1331, 1196, 1177, 1157, 1087, 1059, 1024, 935, 761, 748, 734, 697; **HR-MS** (ESI<sup>+</sup>): calcd. for C<sub>23</sub>H<sub>26</sub>N<sub>2</sub>O<sub>3</sub>Na ([M+Na]<sup>+</sup>): 401.1836, found: 401.1831; **M**(C<sub>23</sub>H<sub>26</sub>N<sub>2</sub>O<sub>3</sub>): 378.47.

### Tetrahydroindeno[2,1-*b*]pyrrole 3u

According to general procedure 2, 2-hydroxy oxime ether **1a** (51 mg, 0.20 mmol, 1.0 equiv), *iso*-propyl acetoacetate (38  $\mu$ L, 0.26 mmol, 1.3 equiv), Sc(OTf)<sub>3</sub> (9.8 mg, 20  $\mu$ mol, 0.10 equiv) and 4 Å molecular sieve (50 mg) were dissolved in abs. CHCl<sub>3</sub> (1.0 mL) and the reaction mixture was heated to 60 °C for 3 h. Benzylamine (44  $\mu$ L, 0.40 mmol, 2.0 equiv) was added and it was stirred at 60 °C for 2 days. Compound **3u** was obtained as a colorless solid (89 mg, 95%).

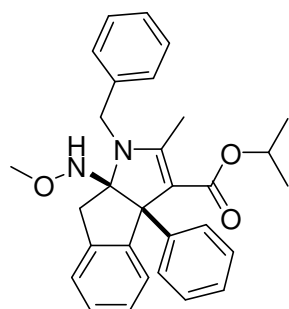

**R<sub>f</sub>**: 0.50 (30% MTBE/hexane); **mp.**: 46 – 48 °C; **<sup>1</sup>H-NMR** (400 MHz, CDCl<sub>3</sub>):  $\delta$  (ppm) = 7.76 – 7.73 (m, 1H), 7.31 – 7.20 (m, 10H), 7.12 – 7.11 (m, 1H), 6.98 – 6.97 (m, 2H), 5.24 (bs, 1H), 5.04 (h, *J* = 6.5 Hz, 1H), 4.84 (d, *J* = 17.5 Hz, 1H), 4.68 (d, *J* = 17.5 Hz, 1H), 3.33 (s, 3H), 3.07 (d, *J* = 16.5 Hz, 1H), 2.96 (d, *J* = 16.5 Hz, 1H), 2.29 (s,

3H), 1.20 (d,  $J = 6.5$  Hz, 1H), 0.94 (d,  $J = 6.5$  Hz, 1H);  **$^{13}\text{C-NMR}$**  (100 MHz,  $\text{CDCl}_3$ ):  $\delta$  (ppm) = 166.4 (C=O), 162.7 ( $\text{C}_q$ ), 148.1 ( $\text{C}_q$ ), 140.0 ( $\text{C}_q$ ), 139.4 ( $\text{C}_q$ ), 138.7 ( $\text{C}_q$ ), 128.6 (2x CH), 127.9 (CH), 127.3 (CH), 127.2 (2x CH), 127.0 (CH), 126.9 (CH), 126.5 (CH), 125.7 (2x CH), 123.8 (CH), 102.8 ( $\text{C}_q$ ), 96.5 ( $\text{C}_q$ ), 68.5 ( $\text{C}_q$ ), 65.6 (CH), 62.0 ( $\text{CH}_3$ ), 45.7 ( $\text{CH}_2$ ), 38.7 ( $\text{CH}_2$ ), 22.4 ( $\text{CH}_3$ ), 21.9 ( $\text{CH}_3$ ), 13.3 ( $\text{CH}_3$ );\* **IR** (KBr):  $\tilde{\nu}$  ( $\text{cm}^{-1}$ ) = 3446, 3061, 3026, 2973, 2933, 2897, 1664, 1589, 1573, 1494, 1466, 1452, 1417, 1403, 1374, 1347, 1313, 1294, 1203, 1166, 1132, 1105, 1076, 1051, 1039, 953, 770, 754, 747, 733, 698; **HR-MS** (ESI<sup>+</sup>): calcd. for  $\text{C}_{30}\text{H}_{32}\text{N}_2\text{O}_3\text{Na}$  ( $[\text{M}+\text{Na}]^+$ ): 491.2305, found: 491.2305;  **$\text{M}(\text{C}_{30}\text{H}_{32}\text{N}_2\text{O}_3)$** : 468.60.

### Tetrahydroindeno[2,1-*b*]pyrrole **3v**

According to general procedure 2, 2-hydroxy oxime ether **1a** (51 mg, 0.20 mmol, 1.0 equiv), allyl acetoacetate (36  $\mu\text{L}$ , 0.26 mmol, 1.3 equiv),  $\text{Sc}(\text{OTf})_3$  (9.8 mg, 20  $\mu\text{mol}$ , 0.10 equiv) and 4 Å molecular sieve (50 mg) were dissolved in abs.  $\text{CHCl}_3$  (1.0 mL) and the reaction mixture was heated to 60 °C for 3 h. Benzylamine (44  $\mu\text{L}$ , 0.40 mmol, 2.0 equiv) was added and it was stirred at 60 °C for 2 days. Compound **3v** was obtained as a colorless solid (88 mg, 94%).

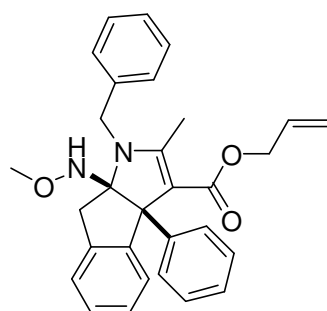

**R<sub>f</sub>**: 0.33 (20% MTBE/hexane); **mp.**: 79 – 82 °C;  **$^1\text{H-NMR}$**  (300 MHz,  $\text{CDCl}_3$ ):  $\delta$  (ppm) = 7.65 – 7.62 (m, 1H), 7.26 – 7.15 (m, 10H), 7.07 – 7.04 (m, 1H), 6.93 – 6.91 (m, 2H), 5.71 (ddt,  $J = 17.5, 10.5, 5.0$  Hz, 1H), 5.15 (bs, 1H), 4.95 (dq,  $J = 10.5, 1.5$  Hz, 1H), 4.87 (dq,  $J = 17.5, 1.5$  Hz, 1H), 4.79 (d,  $J = 17.5$  Hz, 1H), 4.62 (d,  $J = 17.5$  Hz, 1H), 4.57 (ddt,  $J = 14.0, 5.0, 1.5$  Hz, 1H), 4.46 (ddt,  $J = 14.0, 5.0, 1.5$  Hz, 1H), 3.26 (s, 3H), 3.02 (d,

$J = 16.5$  Hz, 1H), 2.92 (d,  $J = 16.5$  Hz, 1H), 2.24 (s, 3H);  **$^{13}\text{C-NMR}$**  (75 MHz,  $\text{CDCl}_3$ ):  $\delta$  (ppm) = 166.4 (C=O), 163.2 ( $\text{C}_q$ ), 148.2 ( $\text{C}_q$ ), 139.7 ( $\text{C}_q$ ), 139.2 ( $\text{C}_q$ ), 138.6 ( $\text{C}_q$ ), 133.3 (CH), 128.7 (2x CH), 128.1 (CH), 127.4 (3x CH), 127.0 (2x CH), 126.7 (CH), 125.7 (2x CH), 123.8 (CH), 116.4 ( $\text{CH}_2$ ), 102.1 ( $\text{C}_q$ ), 96.6 ( $\text{C}_q$ ), 68.4 ( $\text{C}_q$ ), 63.5 ( $\text{CH}_2$ ), 62.0 ( $\text{CH}_3$ ), 45.8 ( $\text{CH}_2$ ), 38.8 ( $\text{CH}_2$ ), 13.5 ( $\text{CH}_3$ );\* **IR** (KBr):  $\tilde{\nu}$  ( $\text{cm}^{-1}$ ) = 3446, 3061, 3026, 2934, 2895, 1671, 1645, 1587, 1569, 1494, 1472, 1447, 1401, 1350, 1322, 1294, 1200, 1164, 1129, 1039, 948, 933, 755, 746, 734, 698; **HR-MS** (ESI<sup>+</sup>): calcd. for  $\text{C}_{30}\text{H}_{30}\text{N}_2\text{O}_3\text{Na}$  ( $[\text{M}+\text{Na}]^+$ ): 489.2149, found: 489.2148;  **$\text{M}(\text{C}_{30}\text{H}_{30}\text{N}_2\text{O}_3)$** : 466.58.

\* One  $^{13}\text{C}$ -signal is very broad and could not be clearly detected.

### Tetrahydroindeno[2,1-*b*]pyrrole 3w

According to [general procedure 2](#), 2-hydroxy oxime ether **1a** (51 mg, 0.20 mmol, 1.0 equiv), benzyl acetoacetate (45  $\mu$ L, 0.26 mmol, 1.3 equiv), Sc(OTf)<sub>3</sub> (9.8 mg, 20  $\mu$ mol, 0.10 equiv) and 4 Å molecular sieve (50 mg) were dissolved in abs. CHCl<sub>3</sub> (1.0 mL) and the reaction mixture was heated to 60 °C for 3 h. Benzylamine (44  $\mu$ L, 0.40 mmol, 2.0 equiv) was added and it was stirred at 60 °C for 2 days. Compound **3w** was obtained as a colorless solid (93 mg, 93%).

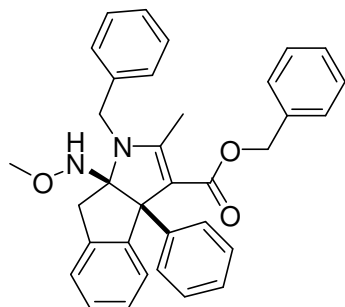

**R<sub>f</sub>**: 0.28 (20% MTBE/hexane); **mp.**: 123 – 125 °C; **<sup>1</sup>H-NMR** (300 MHz, CDCl<sub>3</sub>):  $\delta$  (ppm) = 7.57 – 7.54 (m, 1H), 7.26 – 7.13 (m, 13H), 7.09 – 7.06 (m, 1H), 6.96 – 6.88 (m, 4H), 5.20 (bs, 1H), 5.16 (d,  $J$  = 13.0 Hz, 1H), 5.04 (d,  $J$  = 13.0 Hz, 1H), 4.82 (d,  $J$  = 18.0 Hz, 1H), 4.65 (d,  $J$  = 18.0 Hz, 1H), 3.29 (s, 3H), 3.05 (d,  $J$  = 16.5 Hz, 1H), 2.95 (d,  $J$  = 16.5 Hz, 1H), 2.28 (s, 3H); **<sup>13</sup>C-NMR** (75 MHz, CDCl<sub>3</sub>):  $\delta$  (ppm) = 166.6 (C=O), 163.5 (C<sub>q</sub>),

148.0 (C<sub>q</sub>), 139.9 (C<sub>q</sub>), 139.2 (C<sub>q</sub>), 138.6 (C<sub>q</sub>), 137.2 (C<sub>q</sub>), 128.7 (2x CH), 128.2 (2x CH), 128.1 (CH), 127.5 (4x CH), 127.4 (CH), 127.3 (CH), 127.0 (2x CH), 126.7 (CH), 125.7 (2x CH), 123.8 (CH), 102.1 (C<sub>q</sub>), 96.6 (C<sub>q</sub>), 68.5 (C<sub>q</sub>), 64.6 (CH<sub>2</sub>), 62.0 (CH<sub>3</sub>), 45.8 (CH<sub>2</sub>), 38.8 (CH<sub>2</sub>), 13.5 (CH<sub>3</sub>);\* **IR** (KBr):  $\tilde{\nu}$  (cm<sup>-1</sup>) = 3445, 3061, 3029, 2936, 2894, 1666, 1586, 1570, 1494, 1473, 1418, 1399, 1324, 1295, 1199, 1162, 1129, 948, 754, 745, 733, 698; **HR-MS** (ESI<sup>+</sup>): calcd. for C<sub>34</sub>H<sub>32</sub>N<sub>2</sub>O<sub>3</sub>Na ([M+Na]<sup>+</sup>): 539.2305, found: 539.2307; **M(C<sub>34</sub>H<sub>32</sub>N<sub>2</sub>O<sub>3</sub>)**: 516.64.

### Tetrahydroindeno[2,1-*b*]pyrrole 3x

According to [general procedure 2](#), 2-hydroxy oxime ether **1a** (51 mg, 0.20 mmol, 1.0 equiv), acetylacetone (27  $\mu$ L, 0.26 mmol, 1.3 equiv), Sc(OTf)<sub>3</sub> (9.8 mg, 20  $\mu$ mol, 0.10 equiv) and 4 Å molecular sieve (50 mg) were dissolved in abs. CHCl<sub>3</sub> (1.0 mL) and the reaction mixture was heated to 60 °C for 3 h. Benzylamine (44  $\mu$ L, 0.40 mmol, 2.0 equiv) was added and it was stirred at 60 °C for 2 days. Compound **3x** was obtained as a colorless solid (75 mg, 88%).

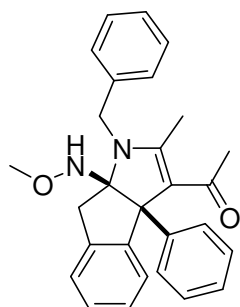

**R<sub>f</sub>**: 0.22 (50% MTBE/hexane); **mp.**: 173 – 175 °C; **<sup>1</sup>H-NMR** (300 MHz, CDCl<sub>3</sub>):  $\delta$  (ppm) = 7.60 – 7.57 (m, 1H), 7.31 – 7.16 (m, 10H), 7.07 – 7.05 (m, 1H), 6.89 – 6.87 (m, 2H), 5.15 (bs, 1H), 4.87 (d,  $J$  = 18.0 Hz, 1H), 4.66 (d,  $J$  = 18.0 Hz, 1H), 3.32 (s, 3H), 3.01 (d,  $J$  = 16.5 Hz, 1H), 2.90 (d,  $J$  = 16.5 Hz, 1H), 2.26 (s, 3H), 2.15 (s, 3H); **<sup>13</sup>C-NMR** (75 MHz, CDCl<sub>3</sub>):  $\delta$  (ppm) = 191.5 (C=O), 163.0 (C<sub>q</sub>), 148.0 (C<sub>q</sub>), 139.4 (C<sub>q</sub>), 138.7 (C<sub>q</sub>),

\* One <sup>13</sup>C-signal is very broad and could not be clearly detected.

138.5 (C<sub>q</sub>), 128.7 (2x CH), 128.2 (CH), 127.8 (2x CH), 127.5 (CH), 127.1 (CH), 127.0 (CH), 126.7 (CH), 125.6 (2x CH), 123.8 (CH), 115.8 (C<sub>q</sub>), 96.7 (C<sub>q</sub>), 68.8 (C<sub>q</sub>), 62.0 (CH<sub>3</sub>), 45.8 (CH<sub>2</sub>), 38.4 (CH<sub>2</sub>), 31.1 (CH<sub>3</sub>), 14.7 (CH<sub>3</sub>);\* **IR** (KBr):  $\tilde{\nu}$  (cm<sup>-1</sup>) = 3441, 3156, 3059, 3028, 2940, 2889, 2804, 1601, 1585, 1572, 1535, 1494, 1474, 1447, 1397, 1350, 1340, 1298, 1162, 1033, 1016, 973, 949, 930, 755, 735, 699; **HR-MS** (ESI<sup>+</sup>): calcd. for C<sub>28</sub>H<sub>28</sub>N<sub>2</sub>O<sub>2</sub>Na ([M+Na]<sup>+</sup>): 447.2043, found: 447.2046; **M**(C<sub>28</sub>H<sub>28</sub>N<sub>2</sub>O<sub>2</sub>): 424.54.

### Tetrahydroindeno[2,1-*b*]pyrrole 3y

According to general procedure 2, 2-hydroxy oxime ether **1a** (51 mg, 0.20 mmol, 1.0 equiv), 6-methylheptane-2,4-dione (40  $\mu$ L, 0.26 mmol, 1.3 equiv), Sc(OTf)<sub>3</sub> (9.8 mg, 20  $\mu$ mol, 0.10 equiv) and 4 Å molecular sieve (50 mg) were dissolved in abs. CHCl<sub>3</sub> (1.0 mL) and the reaction mixture was heated to 60 °C for 3 h. Benzylamine (44  $\mu$ L, 0.40 mmol, 2.0 equiv) was added and it was stirred at 60 °C for 3 days. Compound **3y** was obtained as a colorless solid (43 mg, 46%).

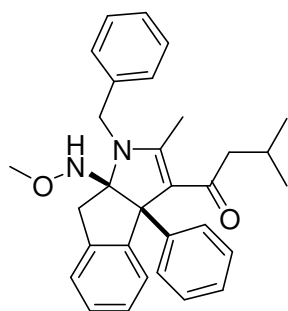

**R<sub>f</sub>**: 0.29 (30% MTBE/hexane); **mp.**: 59 – 61 °C; **<sup>1</sup>H-NMR** (400 MHz, CDCl<sub>3</sub>):  $\delta$  (ppm) = 7.68 – 7.66 (m, 1H), 7.29 – 7.18 (m, 10H), 7.08 – 7.06 (m, 1H), 6.92 – 6.90 (m, 2H), 5.13 (bs, 1H), 4.87 (d, *J* = 18.0 Hz, 1H), 4.66 (d, *J* = 18.0 Hz, 1H), 3.32 (s, 3H), 3.02 (d, *J* = 16.5 Hz, 1H), 2.93 (d, *J* = 16.5 Hz, 1H), 2.41 – 2.29 (m, 2H), 2.27 – 2.20 (m, 4H), 0.92 (d, *J* = 6.5 Hz, 3H), 0.85 (d, *J* = 6.5 Hz, 3H);

**<sup>13</sup>C-NMR** (100 MHz, CDCl<sub>3</sub>):  $\delta$  (ppm) = 193.5 (C=O), 160.9 (C<sub>q</sub>), 148.0 (C<sub>q</sub>), 139.4 (C<sub>q</sub>), 139.0 (C<sub>q</sub>), 138.7 (C<sub>q</sub>), 128.7 (2x CH), 128.1 (CH), 127.6 (2x CH), 127.4 (CH), 127.3 (CH), 127.0 (CH), 126.8 (CH), 125.7 (2x CH), 123.7 (CH), 116.6 (C<sub>q</sub>), 96.1 (C<sub>q</sub>), 69.3 (C<sub>q</sub>), 62.0 (CH<sub>3</sub>), 51.0 (CH<sub>2</sub>), 46.0 (CH<sub>2</sub>), 38.6 (CH<sub>2</sub>), 25.2 (CH), 23.2 (CH<sub>3</sub>), 23.0 (CH<sub>3</sub>), 14.9 (CH<sub>3</sub>);\* **IR** (KBr):  $\tilde{\nu}$  (cm<sup>-1</sup>) = 3445, 3061, 3027, 2952, 2866, 1614, 1606, 1556, 1466, 1398, 1347, 1026, 949, 757, 734, 698; **HR-MS** (ESI<sup>+</sup>): calcd. for C<sub>31</sub>H<sub>35</sub>N<sub>2</sub>O<sub>2</sub> ([M+H]<sup>+</sup>): 467.2693, found: 467.2694; **M**(C<sub>31</sub>H<sub>34</sub>N<sub>2</sub>O<sub>2</sub>): 466.63.

### Tetrahydroindeno[2,1-*b*]pyrrole 3z

According to general procedure 2, 2-hydroxy oxime ether **1a** (51 mg, 0.20 mmol, 1.0 equiv), 1-phenyl-1,3-butanedione (42 mg, 0.26 mmol, 1.3 equiv), Sc(OTf)<sub>3</sub> (9.8 mg, 20  $\mu$ mol, 0.10 equiv) and 4 Å molecular sieve (50 mg) were dissolved in abs. CHCl<sub>3</sub> (1.0 mL) and the reaction mixture was heated to 60 °C for 5 h. Benzylamine (44  $\mu$ L, 0.40 mmol, 2.0 equiv) was

\* One <sup>13</sup>C-signal is very broad and could not be clearly detected.

added and it was stirred at 60 °C for 2 days. Compound **3z** was obtained as a colorless solid (50 mg, 52%).

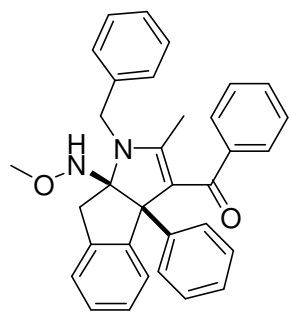

**R<sub>f</sub>**: 0.50 (40% MTBE/hexane); **mp.**: 224 – 226 °C; **<sup>1</sup>H-NMR** (300 MHz, CDCl<sub>3</sub>): δ (ppm) = 8.06 – 8.04 (m, 1H), 7.69 – 7.64 (m, 2H), 7.42 – 7.31 (m, 4H), 7.28 – 7.01 (m, 10H), 6.86 – 6.83 (m, 2H), 5.29 (bs, 1H), 4.92 (d, *J* = 18.0 Hz, 1H), 4.63 (d, *J* = 18.0 Hz, 1H), 3.45 (s, 3H), 3.00 (d, *J* = 16.5 Hz, 1H), 2.90 (d, *J* = 16.5 Hz, 1H), 1.51 (s, 3H); **<sup>13</sup>C-NMR** (75 MHz, CDCl<sub>3</sub>): δ (ppm) = 190.4 (C=O), 162.0 (C<sub>q</sub>), 148.8 (C<sub>q</sub>), 144.1 (C<sub>q</sub>), 138.59 (C<sub>q</sub>), 138.57 (C<sub>q</sub>), 138.0 (C<sub>q</sub>), 130.2 (CH), 129.0 (2x CH), 128.70 (2x CH), 128.65 (CH), 128.56 (2x CH), 128.4 (CH), 128.3 (2x CH), 127.7 (2x CH), 127.4 (CH), 127.1 (CH), 126.8 (CH), 125.6 (2x CH), 123.5 (CH), 115.8 (C<sub>q</sub>), 96.3 (C<sub>q</sub>), 70.0 (C<sub>q</sub>), 62.2 (CH<sub>3</sub>), 45.7 (CH<sub>2</sub>), 38.1 (CH<sub>2</sub>), 15.7 (CH<sub>3</sub>); **IR** (KBr):  $\tilde{\nu}$  (cm<sup>-1</sup>) = 3445, 3161, 3026, 2950, 2929, 1601, 1583, 1541, 1524, 1473, 1446, 1405, 1348, 1014, 951, 738, 699; **HR-MS** (ESI<sup>+</sup>): calcd. for C<sub>33</sub>H<sub>30</sub>N<sub>2</sub>O<sub>2</sub>Na ([M+Na]<sup>+</sup>): 509.2200, found: 509.2202; **M(C<sub>33</sub>H<sub>30</sub>N<sub>2</sub>O<sub>2</sub>)**: 486.62.

### Tetrahydroindeno[2,1-*b*]pyrrole **3aa**

According to general procedure 2, 2-hydroxy oxime ether **1a** (51 mg, 0.20 mmol, 1.0 equiv), 3,5-heptanedione (35 μL, 0.26 mmol, 1.3 equiv), Sc(OTf)<sub>3</sub> (9.8 mg, 20 μmol, 0.10 equiv) and 4 Å molecular sieve (50 mg) were dissolved in abs. CHCl<sub>3</sub> (1.0 mL) and the reaction mixture was heated to 60 °C for 3 h. Benzylamine (44 μL, 0.40 mmol, 2.0 equiv) was added and it was stirred at 60 °C for 8 days. Compound **3aa** was obtained as a colorless solid (39 mg, 43%).

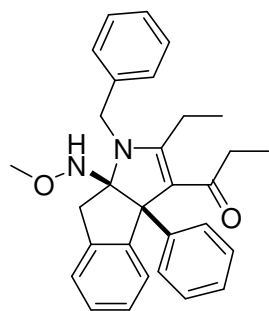

**R<sub>f</sub>**: 0.31 (30% MTBE/hexane); **mp.**: 115 – 117 °C; **<sup>1</sup>H-NMR** (400 MHz, CDCl<sub>3</sub>): δ (ppm) = 7.53 (d, *J* = 7.5 Hz, 1H), 7.33 – 7.16 (m, 10H), 7.02 (d, *J* = 7.5 Hz, 1H), 6.86 – 6.84 (m, 2H), 5.20 (bs, 1H), 4.87 (d, *J* = 18.0 Hz, 1H), 4.70 (d, *J* = 18.0 Hz, 1H), 3.38 (s, 3H), 3.06 (dq, *J* = 13.0, 7.5 Hz, 1H), 2.96 (d, *J* = 16.5 Hz, 1H), 2.84 (d, *J* = 16.5 Hz, 1H), 2.43 (dq, *J* = 14.5, 7.5 Hz, 1H), 2.34 – 2.21 (m, 2H), 1.27 (t, *J* = 7.5 Hz, 3H), 1.07 (t, *J* = 7.5 Hz, 3H); **<sup>13</sup>C-NMR** (100 MHz, CDCl<sub>3</sub>): δ (ppm) = 195.1 (C=O), 168.4 (C<sub>q</sub>), 147.9 (C<sub>q</sub>), 139.7 (C<sub>q</sub>), 139.1 (C<sub>q</sub>), 138.7 (C<sub>q</sub>), 128.6 (2x CH), 128.2 (CH), 127.8 (2x CH), 127.5 (CH), 127.1 (CH), 127.0 (CH), 126.2 (CH), 125.6 (2x CH), 123.9 (CH), 114.4 (C<sub>q</sub>), 97.3 (C<sub>q</sub>), 68.6 (C<sub>q</sub>), 62.2 (CH<sub>3</sub>), 45.2 (CH<sub>2</sub>), 38.0 (CH<sub>2</sub>), 34.8 (CH<sub>2</sub>), 21.0 (CH<sub>2</sub>), 12.5 (CH<sub>3</sub>), 9.7 (CH<sub>3</sub>);\* **IR** (KBr):  $\tilde{\nu}$  (cm<sup>-1</sup>) = 3436, 3061, 3027, 2962, 2934, 2897, 2873, 1720, 1637, 1608, 1547, 1518, 1495, 1473, 1461, 1442, 1422, 1402, 1373,

\* One <sup>13</sup>C-signal is very broad and could not be clearly detected.



1348, 1249, 1123, 1106, 1024, 946, 753, 732, 699; **HR-MS** (ESI<sup>+</sup>): calcd. for C<sub>30</sub>H<sub>32</sub>N<sub>2</sub>O<sub>2</sub>Na ([M+Na]<sup>+</sup>): 475.2356, found: 475.2352; **M**(C<sub>30</sub>H<sub>32</sub>N<sub>2</sub>O<sub>2</sub>): 452.60.

### Tetrahydroindeno[2,1-*b*]pyrrole **3ab**

According to general procedure 2, 2-hydroxy oxime ether **1a** (51 mg, 0.20 mmol, 1.0 equiv), methyl 3-oxopentanoate (33  $\mu$ L, 0.26 mmol, 1.3 equiv), Sc(OTf)<sub>3</sub> (9.8 mg, 20  $\mu$ mol, 0.10 equiv) and 4 Å molecular sieve (50 mg) were dissolved in abs. CHCl<sub>3</sub> (1.0 mL) and the reaction mixture was heated to 60 °C for 3 h. Benzylamine (44  $\mu$ L, 0.40 mmol, 2.0 equiv) was added and it was stirred at 60 °C for 9 days. Compound **3ab** was obtained as a colorless solid (25 mg, 26%).

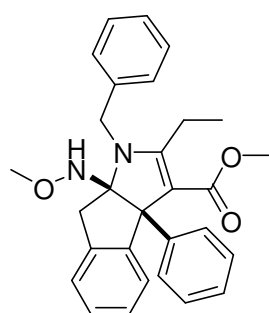

**R<sub>f</sub>**: 0.34 (20% MTBE/hexane); **mp.**: 132 – 135 °C; **<sup>1</sup>H-NMR** (400 MHz, CDCl<sub>3</sub>):  $\delta$  (ppm) = 7.67 – 7.65 (m, 1H), 7.32 – 7.19 (m, 10H), 7.07 – 7.05 (m, 1H), 6.97 – 6.93 (m, 2H), 5.19 (bs, 1H), 4.84 (d, *J* = 18.0 Hz, 1H), 4.67 (d, *J* = 18.0 Hz, 1H), 3.62 (s, 3H), 3.32 (s, 3H), 3.06 – 2.98 (m, 2H), 2.91 (d, *J* = 16.5 Hz, 1H), 2.22 (dq, *J* = 12.5, 7.5 Hz, 1H), 1.22 (t, *J* = 7.5 Hz, 3H); **<sup>13</sup>C-NMR** (100 MHz, CDCl<sub>3</sub>):  $\delta$  (ppm) = 168.1 (C=O), 166.7 (C<sub>q</sub>), 148.3 (C<sub>q</sub>), 139.7 (C<sub>q</sub>), 139.6 (C<sub>q</sub>), 138.7 (C<sub>q</sub>), 128.6 (2x CH), 128.1 (CH), 127.4 (2x CH), 127.3 (CH), 127.0 (CH), 126.9 (CH), 126.7 (CH), 125.7 (2x CH), 123.7 (CH), 101.3 (C<sub>q</sub>), 96.9 (C<sub>q</sub>), 68.2 (C<sub>q</sub>), 62.1 (CH<sub>3</sub>), 49.9 (CH<sub>3</sub>), 45.4 (CH<sub>2</sub>), 38.6 (CH<sub>2</sub>), 20.4 (CH<sub>2</sub>), 12.8 (CH<sub>3</sub>);\* **IR** (KBr):  $\tilde{\nu}$  (cm<sup>-1</sup>) = 3443, 3061, 3028, 2938, 2895, 1668, 1585, 1566, 1494, 1464, 1446, 1433, 1421, 1405, 1340, 1252, 1198, 1182, 1165, 1129, 1107, 1077, 1040, 948, 927, 775, 754, 745, 732, 698; **HR-MS** (ESI<sup>+</sup>): calcd. for C<sub>29</sub>H<sub>30</sub>N<sub>2</sub>O<sub>3</sub>Na ([M+Na]<sup>+</sup>): 477.2149, found: 477.2150; **M**(C<sub>29</sub>H<sub>30</sub>N<sub>2</sub>O<sub>3</sub>): 454.57.

### Tetrahydroindeno[2,1-*b*]pyrrole **3ad**

According to general procedure 2, 2-hydroxy oxime ether **1a** (51 mg, 0.20 mmol, 1.0 equiv), methyl acetoacetate (28  $\mu$ L, 0.26 mmol, 1.3 equiv), Sc(OTf)<sub>3</sub> (9.8 mg, 20  $\mu$ mol, 0.10 equiv) and 4 Å molecular sieve (50 mg) were dissolved in abs. CHCl<sub>3</sub> (1.0 mL) and the reaction mixture was heated to 60 °C for 3 h. *n*-Propylamine (33  $\mu$ L, 0.40 mmol, 2.0 equiv) was added and it was stirred at 60 °C for 2 days. Compound **3ad** was obtained as a colorless solid (73 mg, 93%).

**R<sub>f</sub>**: 0.23 (20% MTBE/hexane); **mp.**: 94 – 95 °C; **<sup>1</sup>H-NMR** (300 MHz, CDCl<sub>3</sub>):  $\delta$  (ppm) = 7.56 – 7.53 (m, 1H), 7.25 – 7.18 (m, 8H), 5.00 (bs, 1H), 3.54 (s, 3H), 3.32 (m, 2H), 3.20 (s, 3H), 3.17 (d, *J* = 16.5 Hz, 1H), 3.10 (d, *J* = 16.5 Hz, 1H), 2.40 (s, 3H), 1.58 – 1.45 (m, 2H), 0.89 (t,

\* One <sup>13</sup>C-signal is very broad and could not be clearly detected.

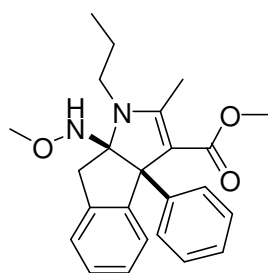

$J = 7.5$  Hz, 3H);  **$^{13}\text{C-NMR}$**  (100 MHz,  $\text{CDCl}_3$ ):  $\delta$  (ppm) = 167.2 (C=O), 162.1 ( $\text{C}_q$ ), 147.8 ( $\text{C}_q$ ), 139.6 ( $\text{C}_q$ ), 139.1 ( $\text{C}_q$ ), 129.1 (2x CH), 127.6 (CH), 127.3 (2x CH), 127.2 (CH), 127.0 (CH), 126.6 (CH), 123.5 (CH), 101.1 ( $\text{C}_q$ ), 96.4 ( $\text{C}_q$ ), 68.3 ( $\text{C}_q$ ), 62.1 ( $\text{CH}_3$ ), 49.7 ( $\text{CH}_3$ ), 44.7 ( $\text{CH}_2$ ), 39.6 ( $\text{CH}_2$ ), 24.8 ( $\text{CH}_2$ ), 13.2 ( $\text{CH}_3$ ), 11.5 ( $\text{CH}_3$ ); **IR** (KBr):  $\tilde{\nu}$  ( $\text{cm}^{-1}$ ) = 3495, 3056, 3021, 2959, 2941, 2893, 2874, 1665, 1583, 1563, 1493, 1475, 1463, 1445, 1429, 1406, 1376, 1365, 1332, 1293, 1197, 1182, 1166, 1134, 1103, 1066, 956, 932, 922, 892, 854, 768, 756, 749, 648, 485; **HR-MS** (ESI+): calcd. for  $\text{C}_{24}\text{H}_{28}\text{N}_2\text{O}_3\text{Na}$  ( $[\text{M}+\text{Na}]^+$ ): 415.1992, found: 415.1991;  **$\text{M}(\text{C}_{24}\text{H}_{28}\text{N}_2\text{O}_3)$** : 392.50.

### Tetrahydroindeno[2,1-*b*]pyrrole 3ae

According to [general procedure 2](#), 2-hydroxy oxime ether **1a** (51 mg, 0.20 mmol, 1.0 equiv), methyl acetoacetate (28  $\mu\text{L}$ , 0.26 mmol, 1.3 equiv),  $\text{Sc}(\text{OTf})_3$  (9.8 mg, 20  $\mu\text{mol}$ , 0.10 equiv) and 4 Å molecular sieve (50 mg) were dissolved in abs.  $\text{CHCl}_3$  (1.0 mL) and the reaction mixture was heated to 60 °C for 3 h. Allylamine (30  $\mu\text{L}$ , 0.40 mmol, 2.0 equiv) was added and it was stirred at 60 °C for 4 days. Compound **3ae** was obtained as a colorless solid (67 mg, 86%).

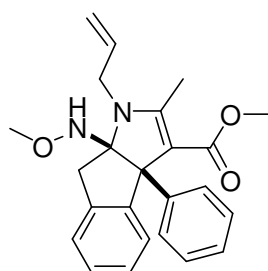

**$R_f$** : 0.35 (30% MTBE/hexane); **mp.**: 97 – 99 °C;  **$^1\text{H-NMR}$**  (300 MHz,  $\text{CDCl}_3$ ):  $\delta$  (ppm) = 7.60 – 7.55 (m, 1H), 7.25 – 7.15 (m, 8H), 5.82 (ddt,  $J = 17.0, 10.5, 4.0$  Hz, 1H), 5.07 (bs, 1H), 4.99 (dq,  $J = 10.5, 2.0$  Hz, 1H), 4.81 (dq,  $J = 17.0, 2.0$  Hz, 1H), 4.15 (ddt,  $J = 18.0, 4.0, 2.0$  Hz, 1H), 3.99 (ddt,  $J = 18.0, 4.0, 2.0$  Hz, 1H), 3.57 (s, 3H), 3.20 (s, 3H), 3.14 (d,  $J = 16.5$  Hz, 1H), 2.98 (d,  $J = 16.5$  Hz, 1H), 2.34 (s, 3H);  **$^{13}\text{C-NMR}$**  (100 MHz,  $\text{CDCl}_3$ ):  $\delta$  (ppm) = 167.2 (C=O), 162.6 ( $\text{C}_q$ ), 148.2 ( $\text{C}_q$ ), 139.8 ( $\text{C}_q$ ), 138.8 ( $\text{C}_q$ ), 135.5 (CH), 127.9 (CH), 127.3 (2x CH), 127.2 (CH), 126.9 (CH), 126.6 (CH), 123.7 (CH), 115.4 ( $\text{CH}_2$ ), 101.5 ( $\text{C}_q$ ), 96.3 ( $\text{C}_q$ ), 68.4 ( $\text{C}_q$ ), 62.0 ( $\text{CH}_3$ ), 49.8 ( $\text{CH}_3$ ), 44.5 ( $\text{CH}_2$ ), 39.0 ( $\text{CH}_2$ ), 13.2 ( $\text{CH}_3$ );\* **IR** (KBr):  $\tilde{\nu}$  ( $\text{cm}^{-1}$ ) = 3462, 3254, 3060, 2976, 2941, 2892, 1666, 1584, 1562, 1495, 1475, 1445, 1428, 1403, 1326, 1292, 1212, 1199, 1183, 1170, 1129, 1106, 1076, 1068, 1043, 945, 928, 755, 745, 698; **HR-MS** (ESI+): calcd. for  $\text{C}_{24}\text{H}_{26}\text{N}_2\text{O}_3\text{Na}$  ( $[\text{M}+\text{Na}]^+$ ): 413.1836, found: 413.1834;  **$\text{M}(\text{C}_{24}\text{H}_{26}\text{N}_2\text{O}_3)$** : 390.48.

### Tetrahydroindeno[2,1-*b*]pyrrole 3af

According to [general procedure 2](#), 2-hydroxy oxime ether **1a** (51 mg, 0.20 mmol, 1.0 equiv), methyl acetoacetate (28  $\mu\text{L}$ , 0.26 mmol, 1.3 equiv),  $\text{Sc}(\text{OTf})_3$  (9.8 mg, 20  $\mu\text{mol}$ , 0.10 equiv)

\* One  $^{13}\text{C}$ -signal is very broad and could not be clearly detected.

and 4 Å molecular sieve (50 mg) were dissolved in abs.  $\text{CHCl}_3$  (1.0 mL) and the reaction mixture was heated to 60 °C for 3 h. 2-Phenylethylamine (50  $\mu\text{L}$ , 0.40 mmol, 2.0 equiv) was added and it was stirred at 60 °C for 2 days. Compound **3af** was obtained as a colorless solid (87 mg, 95%).

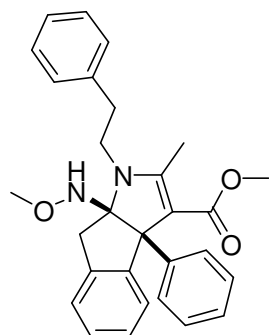

**R<sub>f</sub>**: 0.50 (30% MTBE/hexane); **mp.**: 111 – 114 °C; **<sup>1</sup>H-NMR** (300 MHz,  $\text{CDCl}_3$ ):  $\delta$  (ppm) = 7.55 – 7.51 (m, 1H), 7.30 – 7.20 (m, 11H), 7.10 – 7.07 (m, 2H), 4.96 (bs, 1H), 3.72 – 3.51 (m, 5H), 3.21 (s, 3H), 3.20 (d,  $J$  = 16.5 Hz, 1H), 3.12 (d,  $J$  = 16.5 Hz, 1H), 2.82 – 2.75 (m, 2H), 2.33 (s, 3H); **<sup>13</sup>C-NMR** (75 MHz,  $\text{CDCl}_3$ ):  $\delta$  (ppm) = 167.1 (C=O), 161.7 ( $\text{C}_q$ ), 147.6 ( $\text{C}_q$ ), 139.4 ( $\text{C}_q$ ), 139.3 ( $\text{C}_q$ ), 139.0 ( $\text{C}_q$ ), 129.1 (2x CH), 128.9 (2x CH), 128.7 (2x CH), 127.5 (CH), 127.4 (2x CH), 127.3 (CH), 127.1 (CH), 126.7 (CH), 126.7 (CH), 123.6 (CH), 101.6 ( $\text{C}_q$ ), 96.5 ( $\text{C}_q$ ), 68.4 ( $\text{C}_q$ ), 62.2 ( $\text{CH}_3$ ), 49.8 ( $\text{CH}_3$ ), 44.9 ( $\text{CH}_2$ ), 39.8 ( $\text{CH}_2$ ), 38.2 ( $\text{CH}_2$ ), 13.1 ( $\text{CH}_3$ ); **IR** (KBr):  $\tilde{\nu}$  ( $\text{cm}^{-1}$ ) = 3445, 3059, 3024, 2946, 2885, 1671, 1586, 1571, 1494, 1475, 1457, 1445, 1399, 1359, 1327, 1314, 1194, 1156, 1128, 1105, 1063, 989, 960, 949, 929, 770, 753, 720, 699, 496; **HR-MS** (ESI<sup>+</sup>): calcd. for  $\text{C}_{29}\text{H}_{30}\text{N}_2\text{O}_3\text{Na}$  ( $[\text{M}+\text{Na}]^+$ ): 477.2149, found: 477.2152; **M**( $\text{C}_{29}\text{H}_{30}\text{N}_2\text{O}_3$ ): 454.57.

### Tetrahydroindeno[2,1-*b*]pyrrole **3ag**

According to [general procedure 2](#), 2-hydroxy oxime ether **1a** (51 mg, 0.20 mmol, 1.0 equiv), methyl acetoacetate (28  $\mu\text{L}$ , 0.26 mmol, 1.3 equiv),  $\text{Sc}(\text{OTf})_3$  (9.8 mg, 20  $\mu\text{mol}$ , 0.10 equiv) and 4 Å molecular sieve (50 mg) were dissolved in abs.  $\text{CHCl}_3$  (1.0 mL) and the reaction mixture was heated to 60 °C for 3 h. *N,N*-Dimethylethylenediamine (44  $\mu\text{L}$ , 0.40 mmol, 2.0 equiv) was added and it was stirred at 60 °C for 1 day. After flash column chromatography (1% → 5% MeOH/ $\text{CH}_2\text{Cl}_2$ ), Compound **3ag** was obtained as a colorless solid (80 mg, 95%).

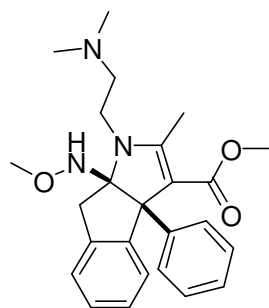

**R<sub>f</sub>**: 0.15 (4% MeOH/ $\text{CH}_2\text{Cl}_2$ ); **mp.**: 122 – 124 °C; **<sup>1</sup>H-NMR** (300 MHz,  $\text{CDCl}_3$ ):  $\delta$  (ppm) = 7.53 – 7.51 (m, 1H), 7.23 – 7.18 (m, 8H), 5.21 (bs, 1H), 3.63 – 3.47 (m, 4H), 3.42 (ddd,  $J$  = 15.0, 9.5, 6.0 Hz, 1H), 3.16 (m, 5H), 2.47 – 2.37 (m, 4H), 2.34 – 2.24 (m, 7H); **<sup>13</sup>C-NMR** (75 MHz,  $\text{CDCl}_3$ ):  $\delta$  (ppm) = 167.1 (C=O), 161.7 ( $\text{C}_q$ ), 147.7 ( $\text{C}_q$ ), 139.6 ( $\text{C}_q$ ), 139.3 ( $\text{C}_q$ ), 129.1 (2x CH), 127.6 (CH), 127.33 (2x CH), 127.30 (CH), 127.1 (CH), 126.6 (CH), 123.6 CH), 101.6 ( $\text{C}_q$ ), 96.3 ( $\text{C}_q$ ), 68.4 ( $\text{C}_q$ ), 62.0 ( $\text{CH}_3$ ), 60.3 ( $\text{CH}_2$ ), 49.8 ( $\text{CH}_3$ ), 46.0 (2x  $\text{CH}_3$ ), 41.3 ( $\text{CH}_2$ ), 39.7 ( $\text{CH}_2$ ), 13.3 ( $\text{CH}_3$ ); **IR** (KBr):  $\tilde{\nu}$  ( $\text{cm}^{-1}$ ) = 3446, 3064, 2944, 2904, 2822, 2770, 1661, 1584, 1566, 1493, 1474, 1459, 1445, 1408, 1353, 1336, 1322, 1310, 1197, 1183, 1166, 1143, 1128, 1107, 1065, 993, 950,

932, 771, 753, 743, 699; **HR-MS** (ESI<sup>+</sup>): calcd. for C<sub>25</sub>H<sub>31</sub>N<sub>3</sub>O<sub>3</sub>Na ([M+Na]<sup>+</sup>): 444.2258, found: 444.2255; **M**(C<sub>25</sub>H<sub>31</sub>N<sub>3</sub>O<sub>3</sub>): 421.54.

### Tetrahydroindeno[2,1-*b*]pyrrole **3ah**

Glycine methyl ester hydrochloride was treated with sat. NaHCO<sub>3</sub>-solution and extracted twice with CH<sub>2</sub>Cl<sub>2</sub>. The combined organic phases were dried over Na<sub>2</sub>SO<sub>4</sub>, filtered and the solvent was removed under reduced pressure. Glycine methyl ester was used without further purification.

According to general procedure 2, 2-hydroxy oxime ether **1a** (51 mg, 0.20 mmol, 1.0 equiv), methyl acetoacetate (28  $\mu$ L, 0.26 mmol, 1.3 equiv), Sc(OTf)<sub>3</sub> (9.8 mg, 20  $\mu$ mol, 0.10 equiv) and 4 Å molecular sieve (50 mg) were dissolved in abs. CHCl<sub>3</sub> (1.0 mL) and the reaction mixture was heated to 60 °C for 3 h. Glycine methyl ester (71 mg, 0.80 mmol, 4.0 equiv) was added and it was stirred at 60 °C for 6 days. Compound **3ah** was obtained as a colorless solid (68 mg, 81%).

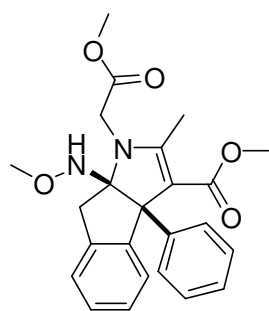

**R<sub>f</sub>**: 0.28 (40% MTBE/hexane); **mp.**: 136 – 138 °C; **<sup>1</sup>H-NMR** (400 MHz, CDCl<sub>3</sub>):  $\delta$  (ppm) = 7.60 – 7.56 (m, 1H), 7.25 – 7.18 (m, 8H), 5.22 (bs, 1H), 4.16 (s, 2H), 3.70 (s, 3H), 3.55 (s, 3H), 3.32 (d, *J* = 16.5 Hz, 1H), 3.21 (d, *J* = 16.5 Hz, 1H), 3.16 (s, 3H), 2.31 (s, 3H); **<sup>13</sup>C-NMR** (100 MHz, CDCl<sub>3</sub>):  $\delta$  (ppm) = 171.3 (C=O), 166.9 (C=O), 160.0 (C<sub>q</sub>), 146.9 (C<sub>q</sub>), 139.9 (C<sub>q</sub>), 139.8 (C<sub>q</sub>), 128.6 (2x CH), 127.5 (2x CH), 127.4 (2x CH), 127.3 (CH), 126.6 (CH), 123.9 (CH), 102.7 (C<sub>q</sub>), 95.1 (C<sub>q</sub>), 69.0 (C<sub>q</sub>), 62.4 (CH<sub>3</sub>), 52.3 (CH<sub>3</sub>), 49.9 (CH<sub>3</sub>), 45.0 (CH<sub>2</sub>), 40.1 (CH<sub>2</sub>), 13.1 (CH<sub>3</sub>); **IR** (KBr):  $\tilde{\nu}$  (cm<sup>-1</sup>) = 3450, 3026, 2950, 2935, 1750, 1666, 1590, 1576, 1433, 1393, 1365, 1345, 1201, 1171, 1129, 1093, 1013, 916, 753, 700; **HR-MS** (ESI<sup>+</sup>): calcd. for C<sub>24</sub>H<sub>26</sub>N<sub>2</sub>O<sub>5</sub>Na ([M+Na]<sup>+</sup>): 445.1734, found: 445.1735; **M**(C<sub>24</sub>H<sub>26</sub>N<sub>2</sub>O<sub>5</sub>): 422.48.

### Tetrahydroindeno[2,1-*b*]pyrrole **3ai**

According to general procedure 2, 2-hydroxy oxime ether **1a** (51 mg, 0.20 mmol, 1.0 equiv), methyl acetoacetate (28  $\mu$ L, 0.26 mmol, 1.3 equiv), Sc(OTf)<sub>3</sub> (9.8 mg, 20  $\mu$ mol, 0.10 equiv) and 4 Å molecular sieve (50 mg) were dissolved in abs. CHCl<sub>3</sub> (1.0 mL) and the reaction mixture was heated to 60 °C for 3 h. Cyclohexylamine (46  $\mu$ L, 0.40 mmol, 2.0 equiv) was added and it was stirred at 60 °C for 4.5 days followed by 90 °C for 1 day. Compound **3ai** was obtained as a colorless solid (55 mg, 60%).

**R<sub>f</sub>**: 0.31 (30% MTBE/hexane); **mp.**: 106 – 109 °C; **<sup>1</sup>H-NMR** (400 MHz, CDCl<sub>3</sub>):  $\delta$  (ppm) = 7.57 – 7.54 (m, 1H), 7.25 – 7.18 (m, 8H), 4.90 (bs, 1H), 3.52 – 3.49 (m, 4H), 3.24 (s, 2H),

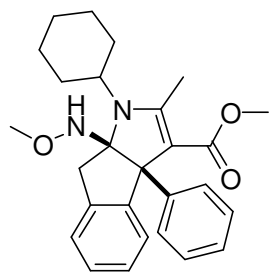

3.08 (s, 3H), 2.49 (s, 3H), 1.93 – 1.66 (m, 7H), 1.38 – 1.08 (m, 3H); **<sup>13</sup>C-NMR** (100 MHz, CDCl<sub>3</sub>):  $\delta$  (ppm) = 167.3 (C=O), 161.7 (C<sub>q</sub>), 147.7 (C<sub>q</sub>), 140.0 (C<sub>q</sub>), 139.7 (C<sub>q</sub>), 129.0 (2x CH), 127.4 (CH), 127.32 (CH), 127.27 (2x CH), 126.9 (CH), 126.5 (CH), 123.4 (CH), 101.2 (C<sub>q</sub>), 97.1 (C<sub>q</sub>), 68.7 (C<sub>q</sub>), 61.5 (CH<sub>3</sub>), 55.7 (CH), 49.6 (CH<sub>3</sub>), 40.7 (CH<sub>2</sub>), 34.0 (CH<sub>2</sub>), 32.8 (CH<sub>2</sub>), 27.1 (CH<sub>2</sub>), 27.0 (CH<sub>2</sub>), 25.8 (CH<sub>2</sub>), 15.2 (CH<sub>3</sub>); **IR** (KBr):  $\tilde{\nu}$  (cm<sup>-1</sup>) = 3444, 3063, 2934, 2852, 1668, 1584, 1561, 1509, 1445, 1433, 1413, 1374, 1349, 1334, 1240, 1185, 1129, 754, 739, 700; **HR-MS** (ESI<sup>+</sup>): calcd. for C<sub>27</sub>H<sub>32</sub>N<sub>2</sub>O<sub>3</sub>Na ([M+Na]<sup>+</sup>): 455.2305, found: 455.2309; **M(C<sub>27</sub>H<sub>32</sub>N<sub>2</sub>O<sub>3</sub>)**: 432.56.

### 3.2 $^1\text{H}$ -NMR and $^{13}\text{C}$ -NMR Spectra

Intermediate 2a ( $\text{CDCl}_3$ ,  $^1\text{H}$ -NMR: 300 MHz, APT: 75 MHz)

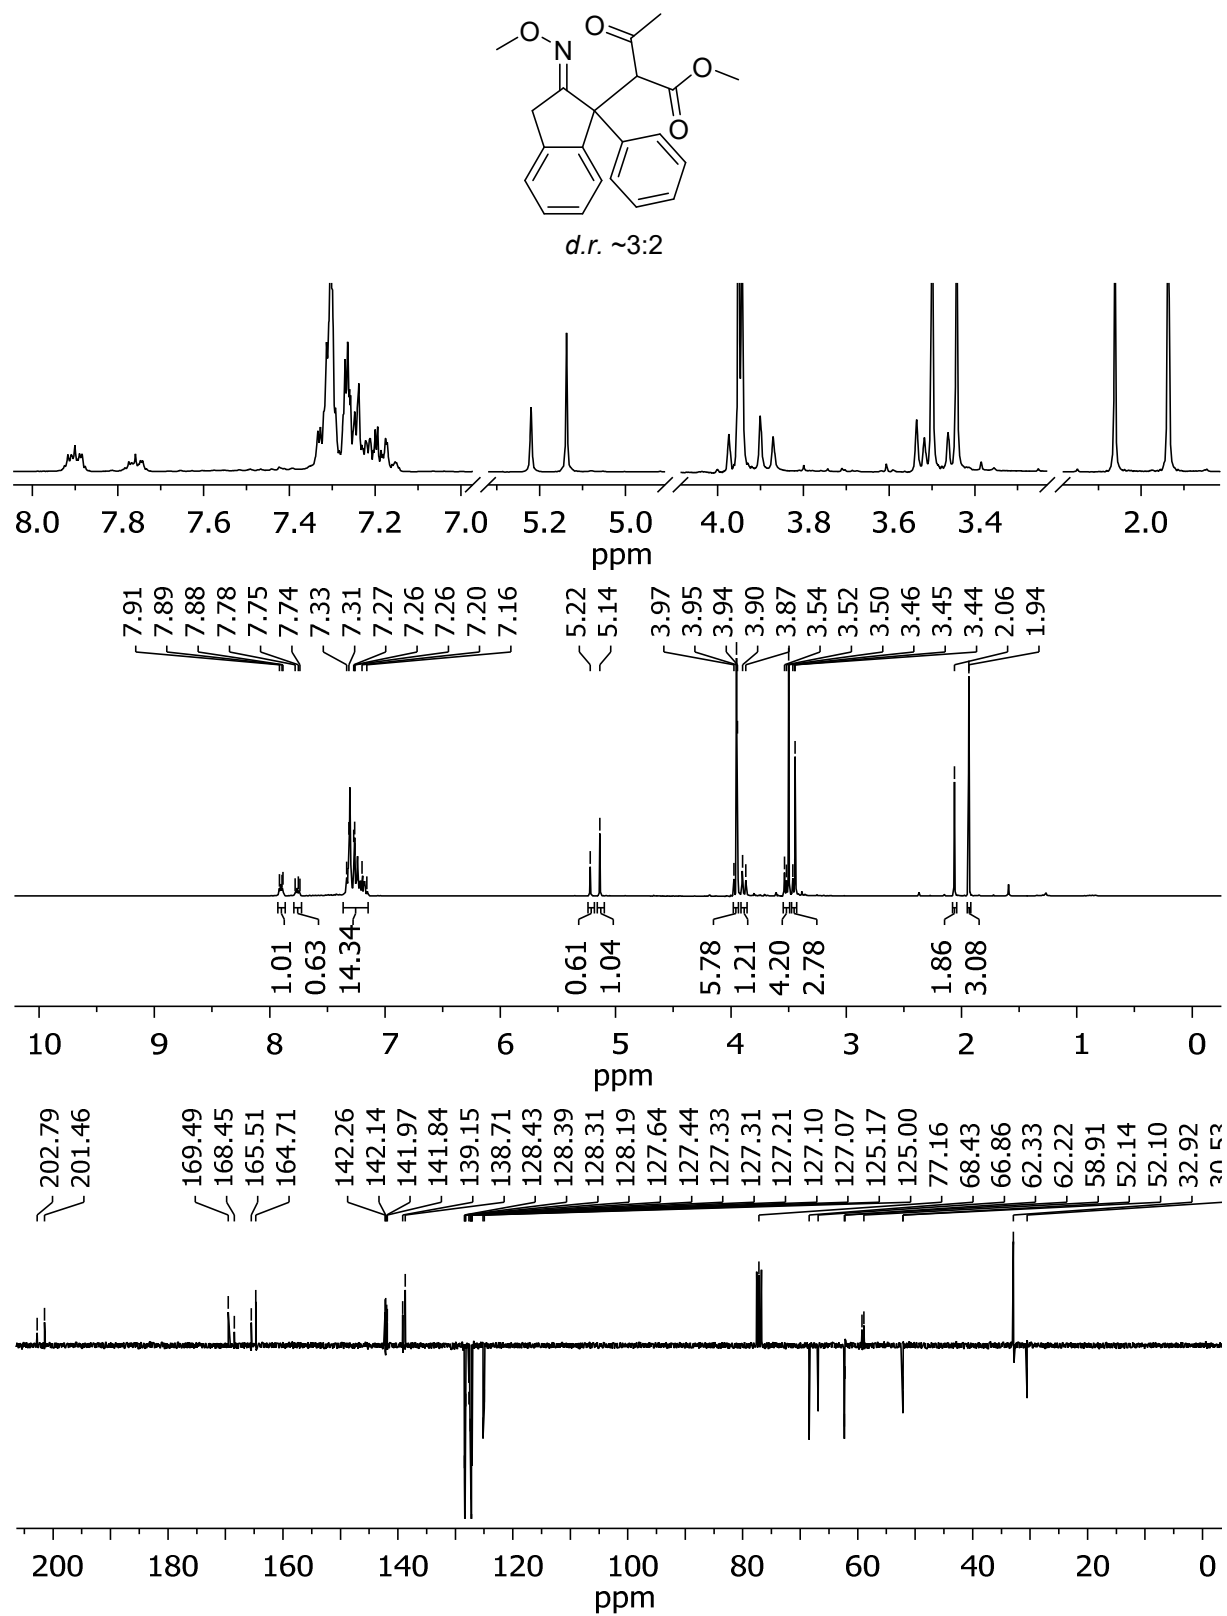

**Tetrahydroindeno[2,1-*b*]pyrrole 3a** (CDCl<sub>3</sub>, <sup>1</sup>H-NMR: 400 MHz, APT: 100 MHz)

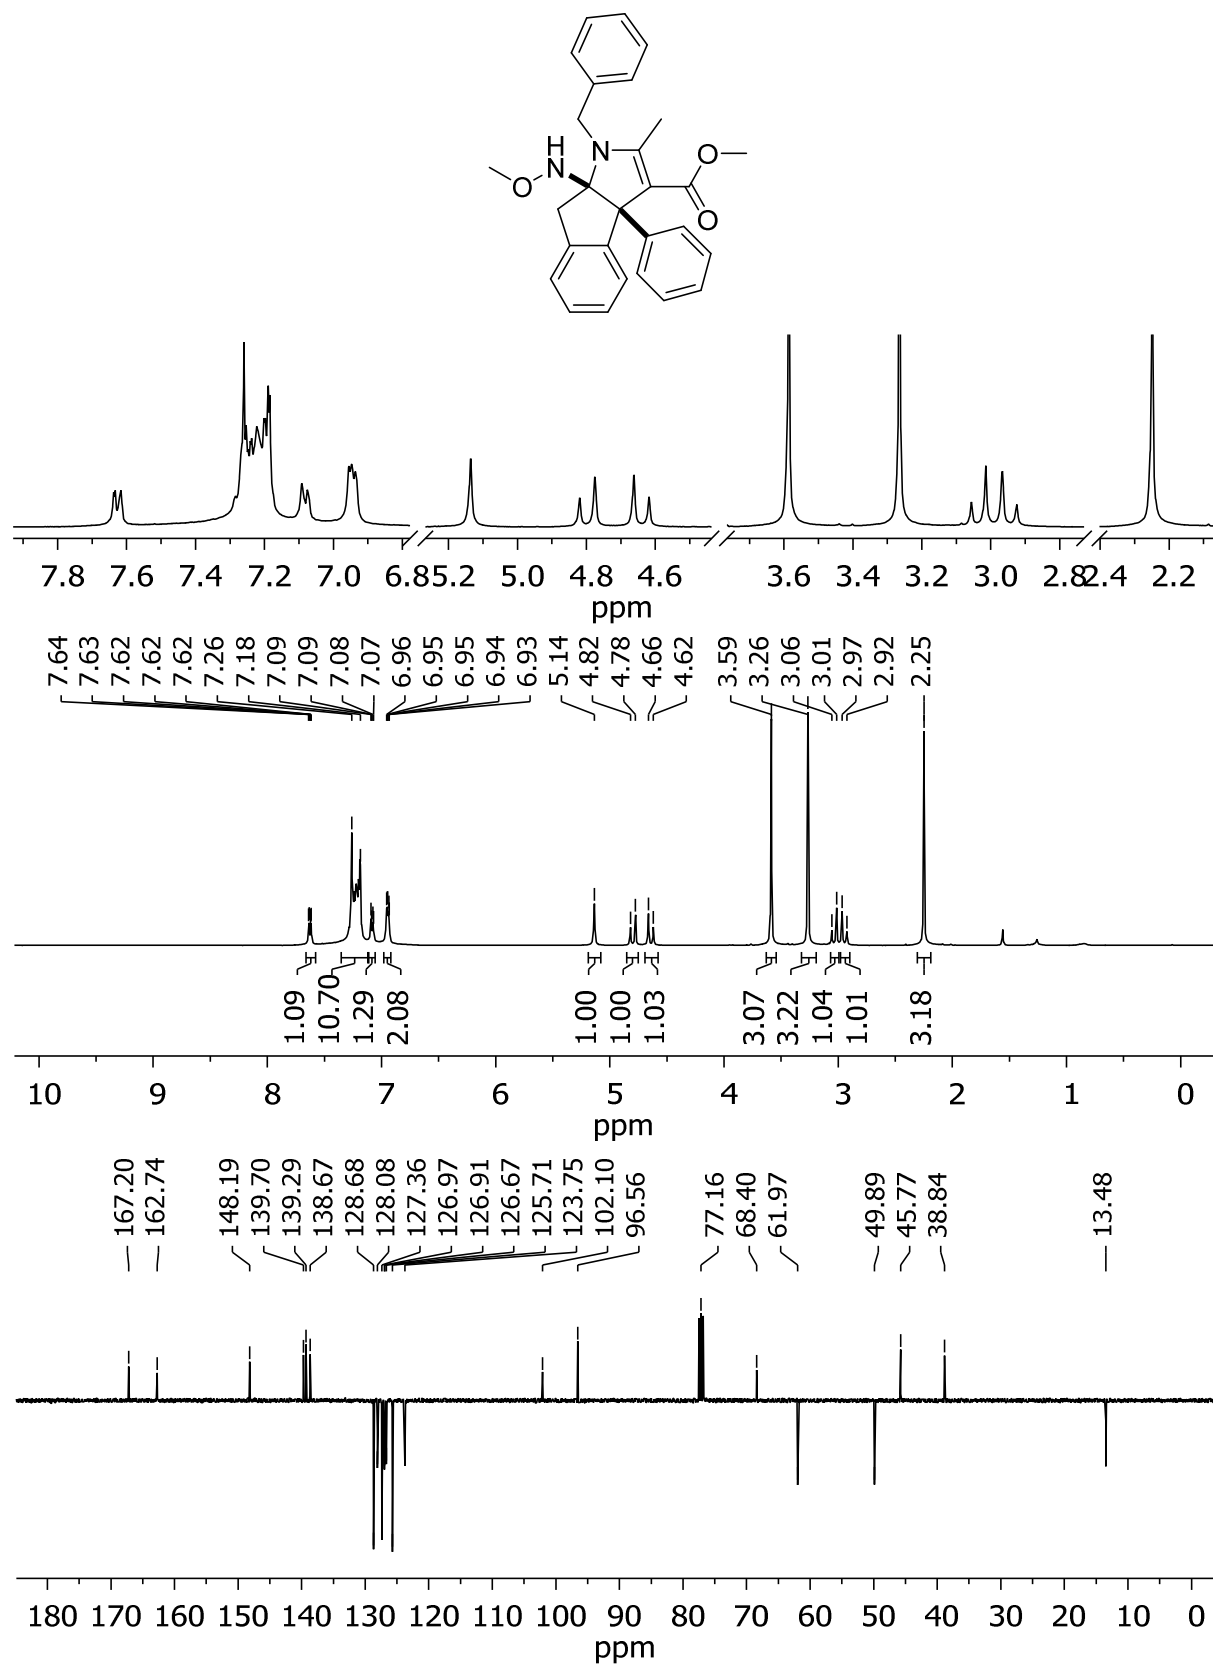

**Tetrahydroindeno[2,1-*b*]pyrrole 3b** (CDCl<sub>3</sub>, <sup>1</sup>H-NMR: 300 MHz, APT: 75 MHz)

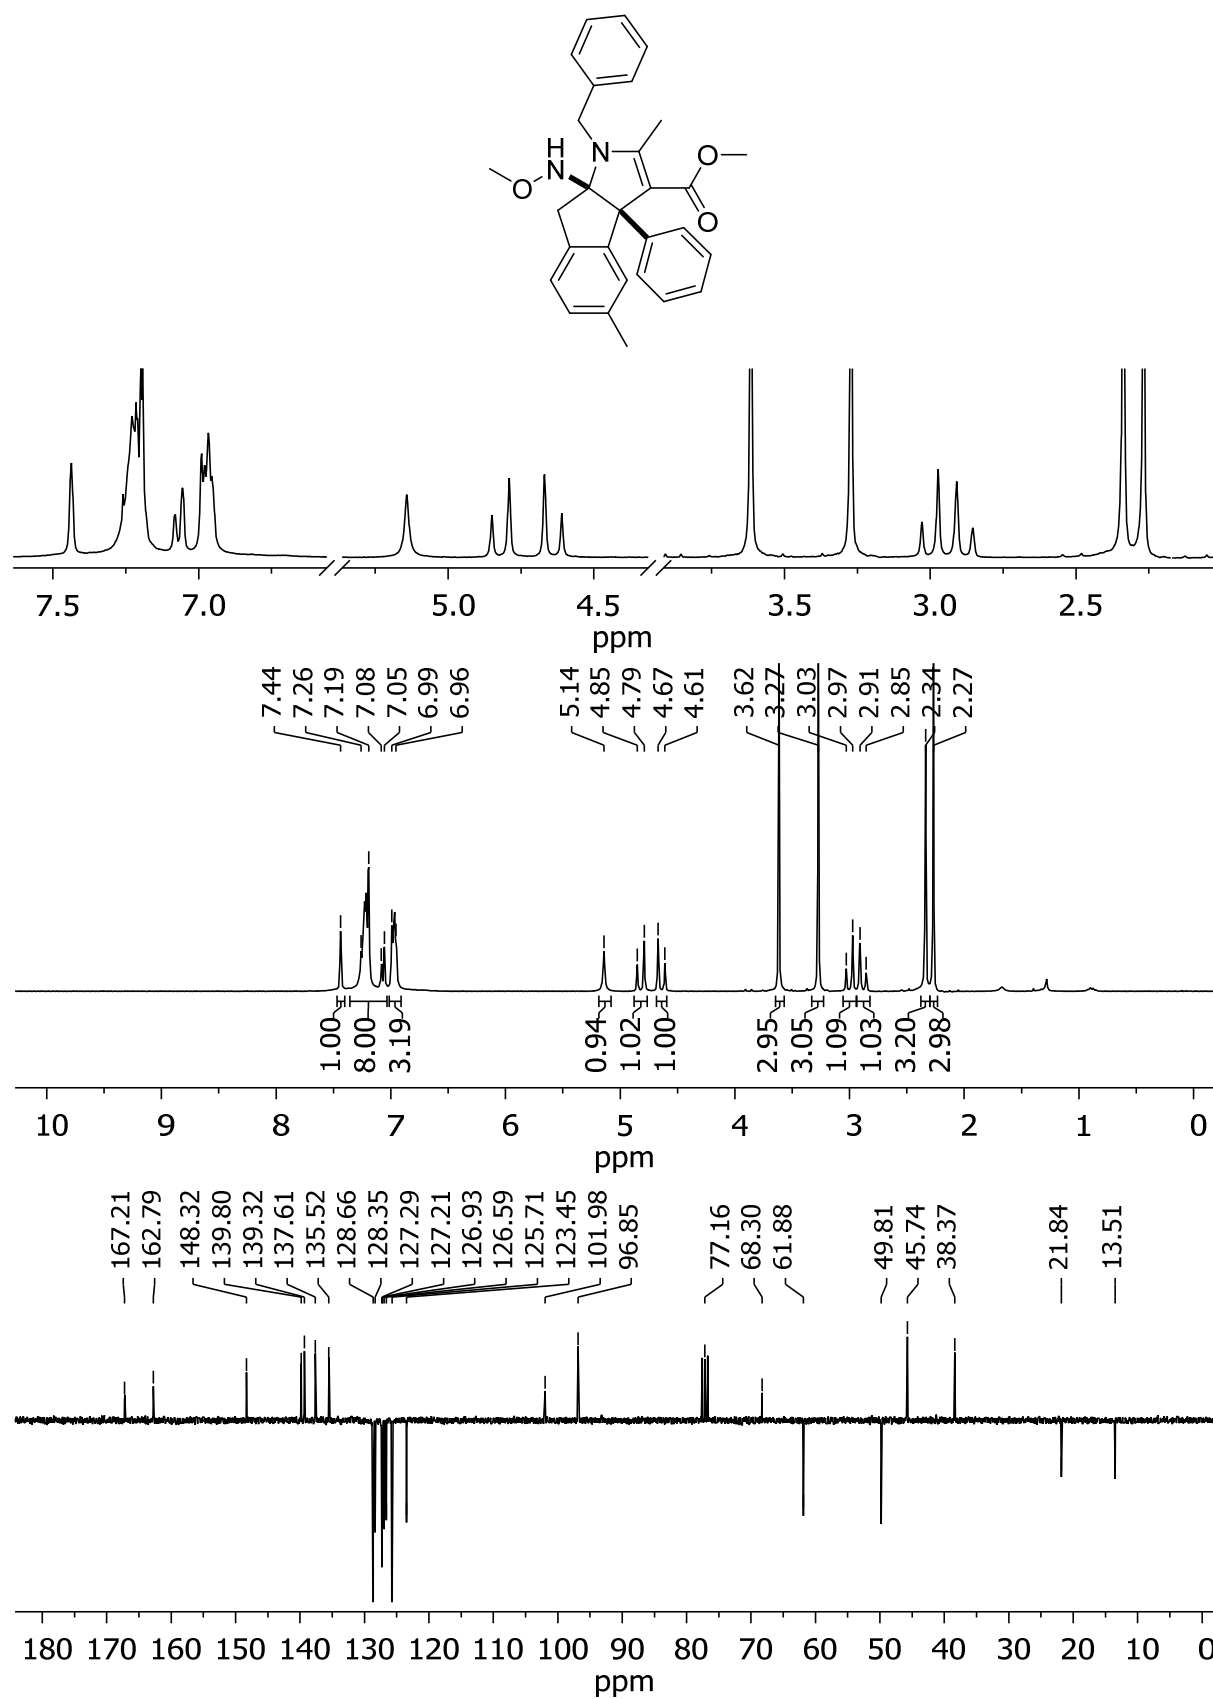



**Tetrahydroindeno[2,1-*b*]pyrrole 3d** (CDCl<sub>3</sub>, <sup>1</sup>H-NMR: 400 MHz, APT: 100 MHz)

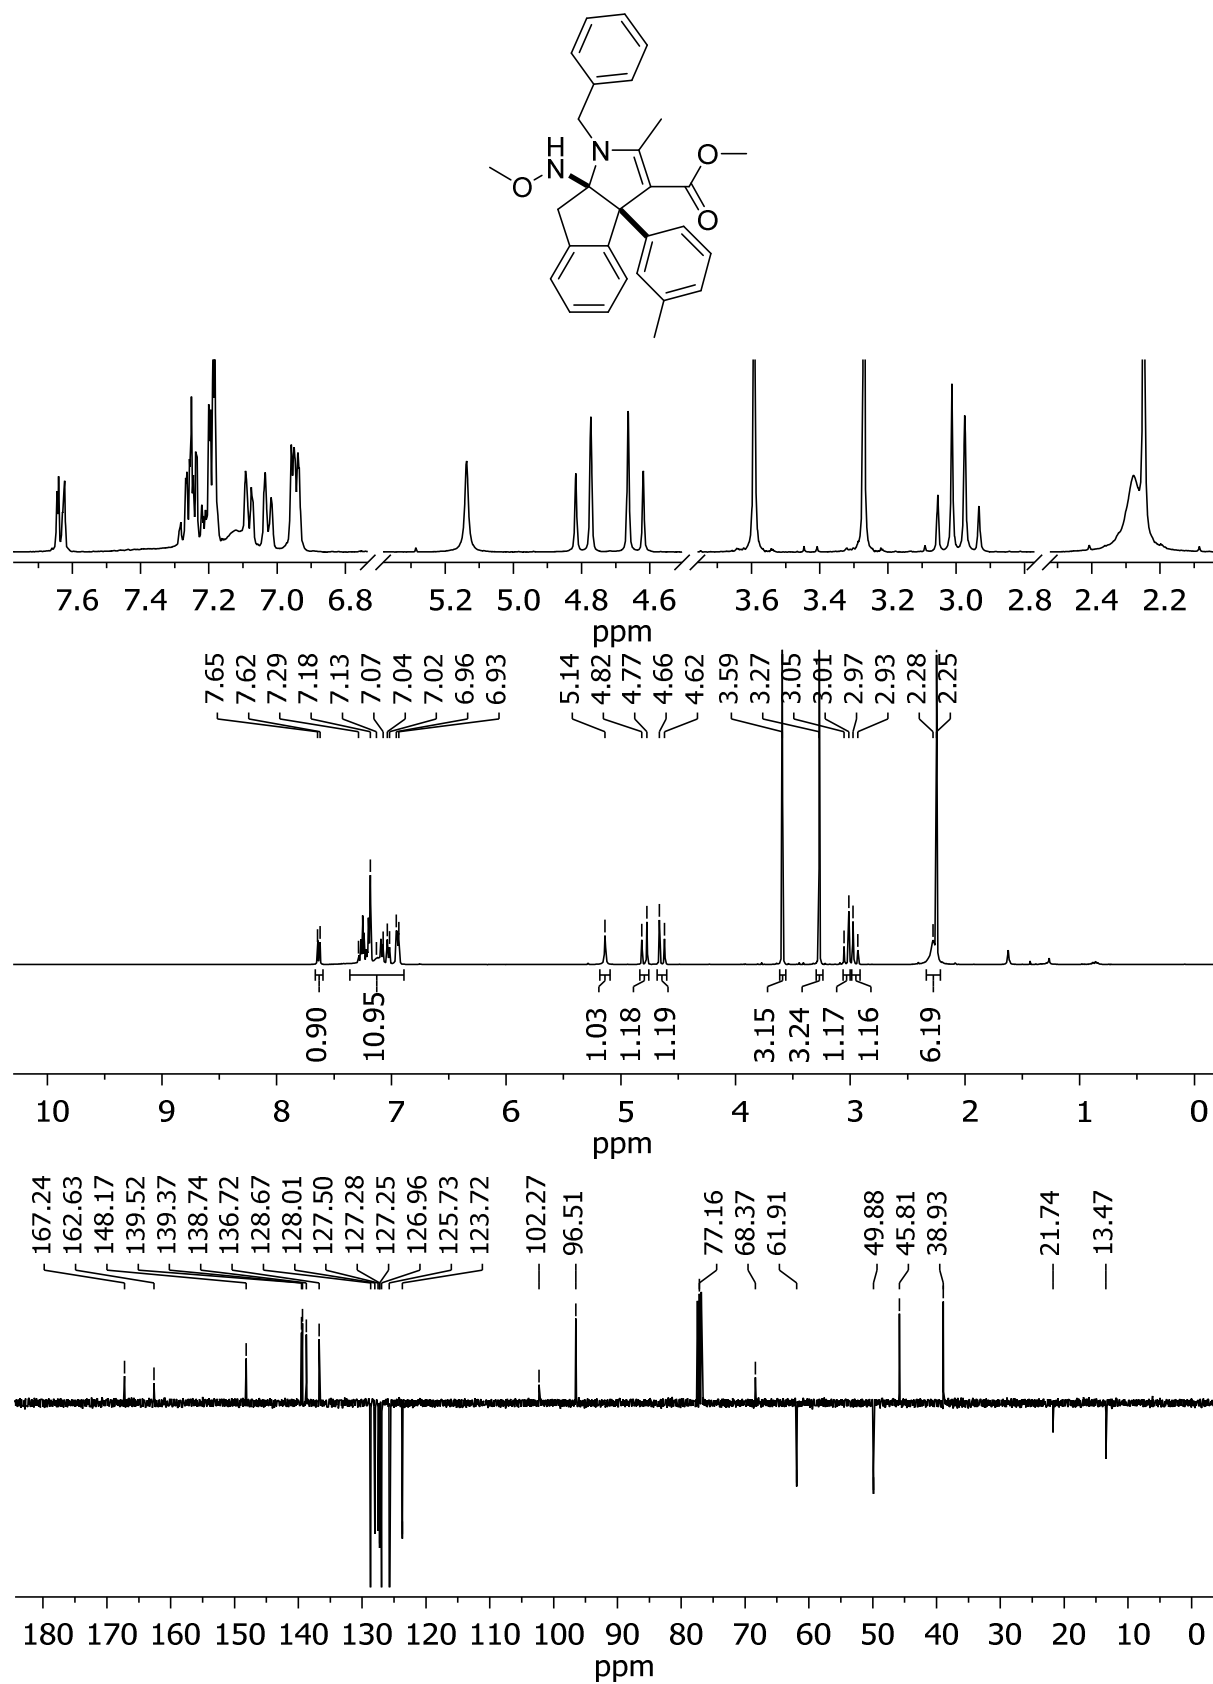

**Tetrahydroindeno[2,1-*b*]pyrrole 3e** (CDCl<sub>3</sub>, <sup>1</sup>H-NMR: 400 MHz, APT: 100 MHz)

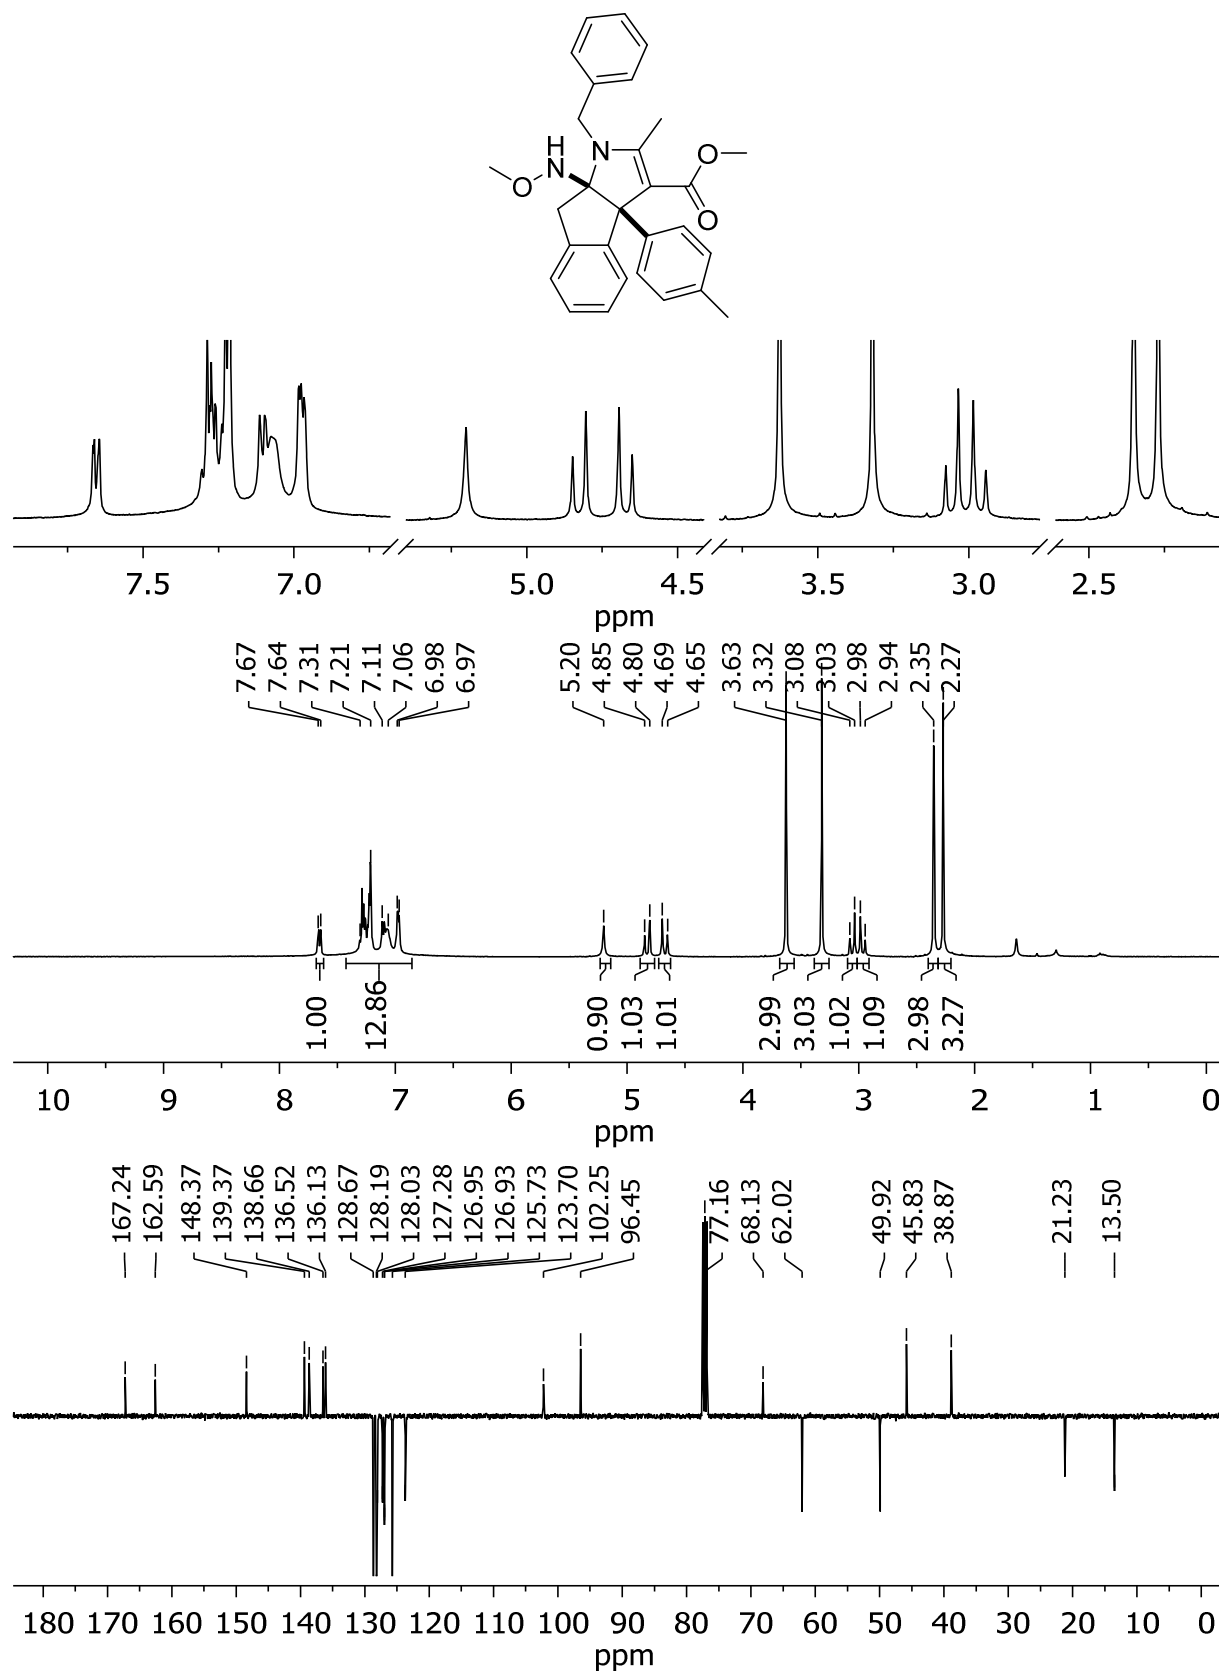

**Tetrahydroindeno[2,1-*b*]pyrrole 3f** (CDCl<sub>3</sub>, <sup>1</sup>H-NMR: 400 MHz, APT: 100 MHz)

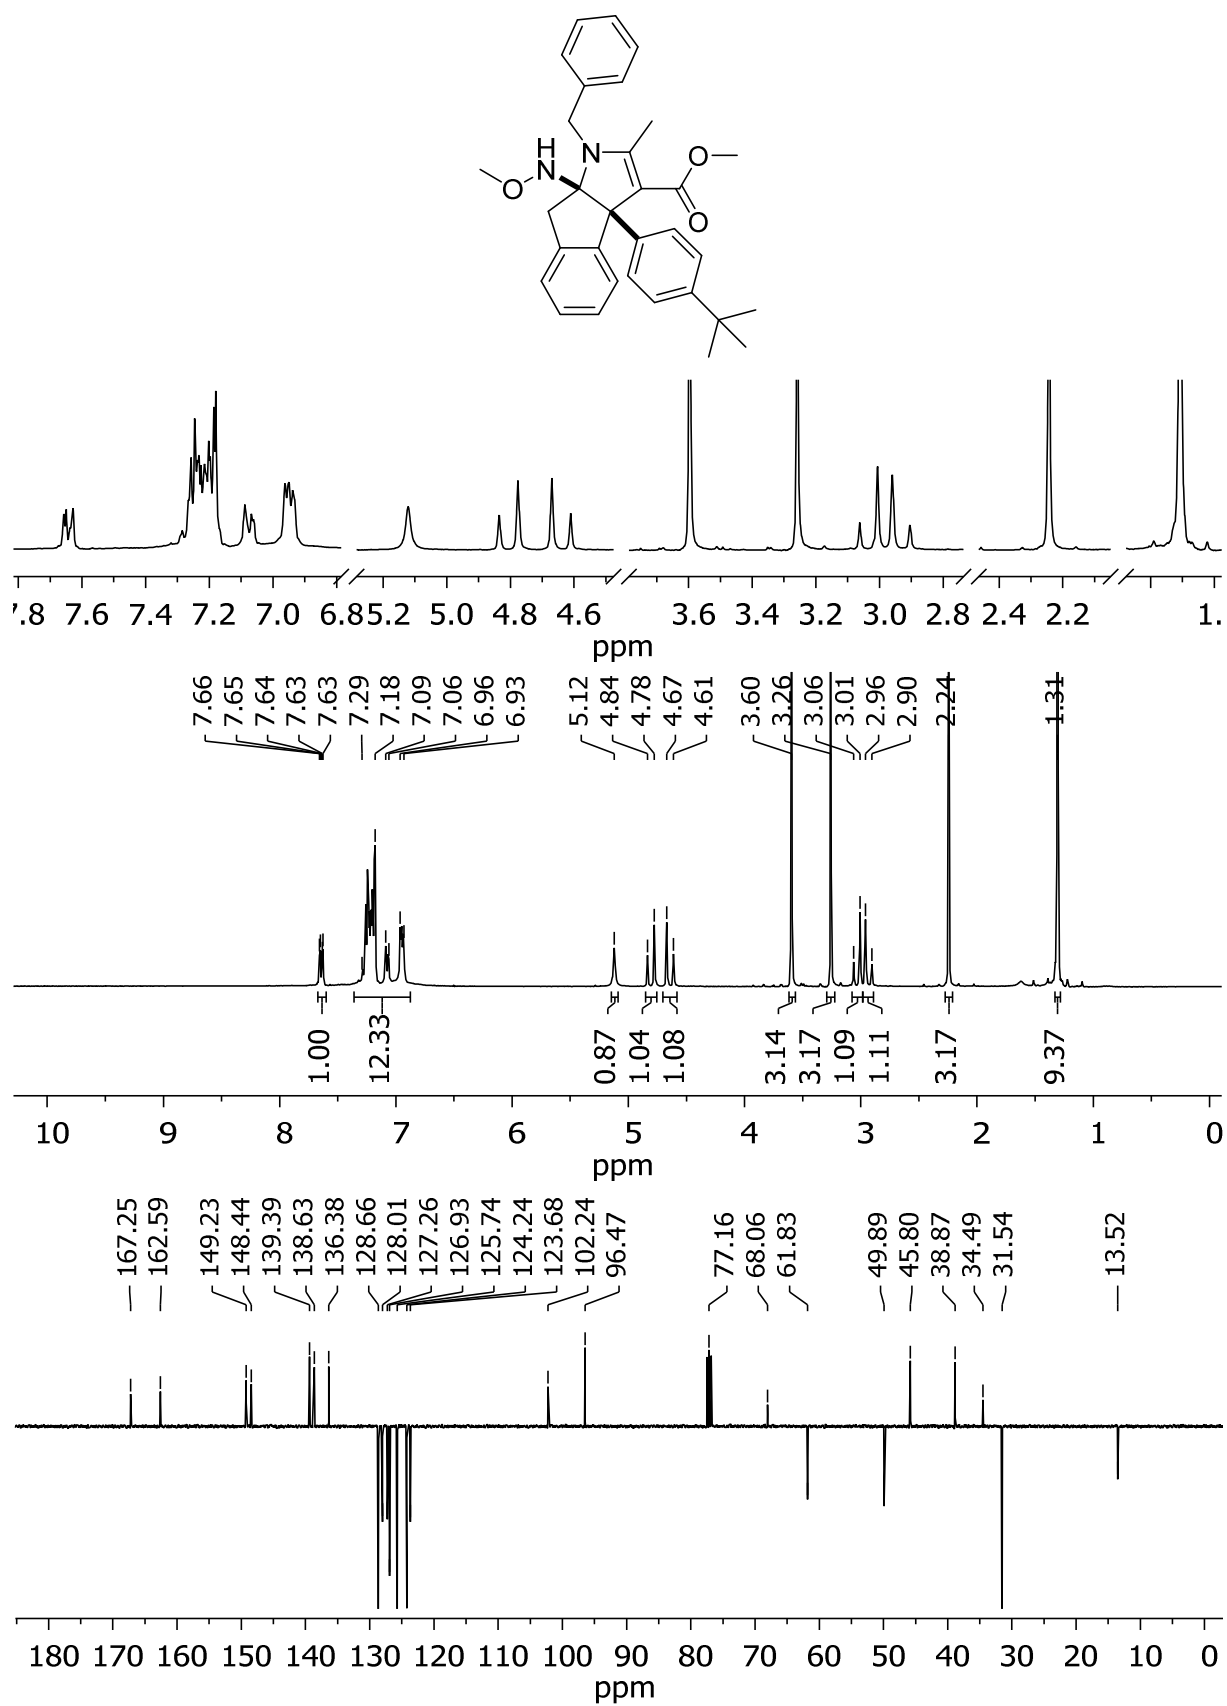

**Tetrahydroindeno[2,1-*b*]pyrrole 3g** (CDCl<sub>3</sub>, <sup>1</sup>H-NMR: 400 MHz, APT: 100 MHz)

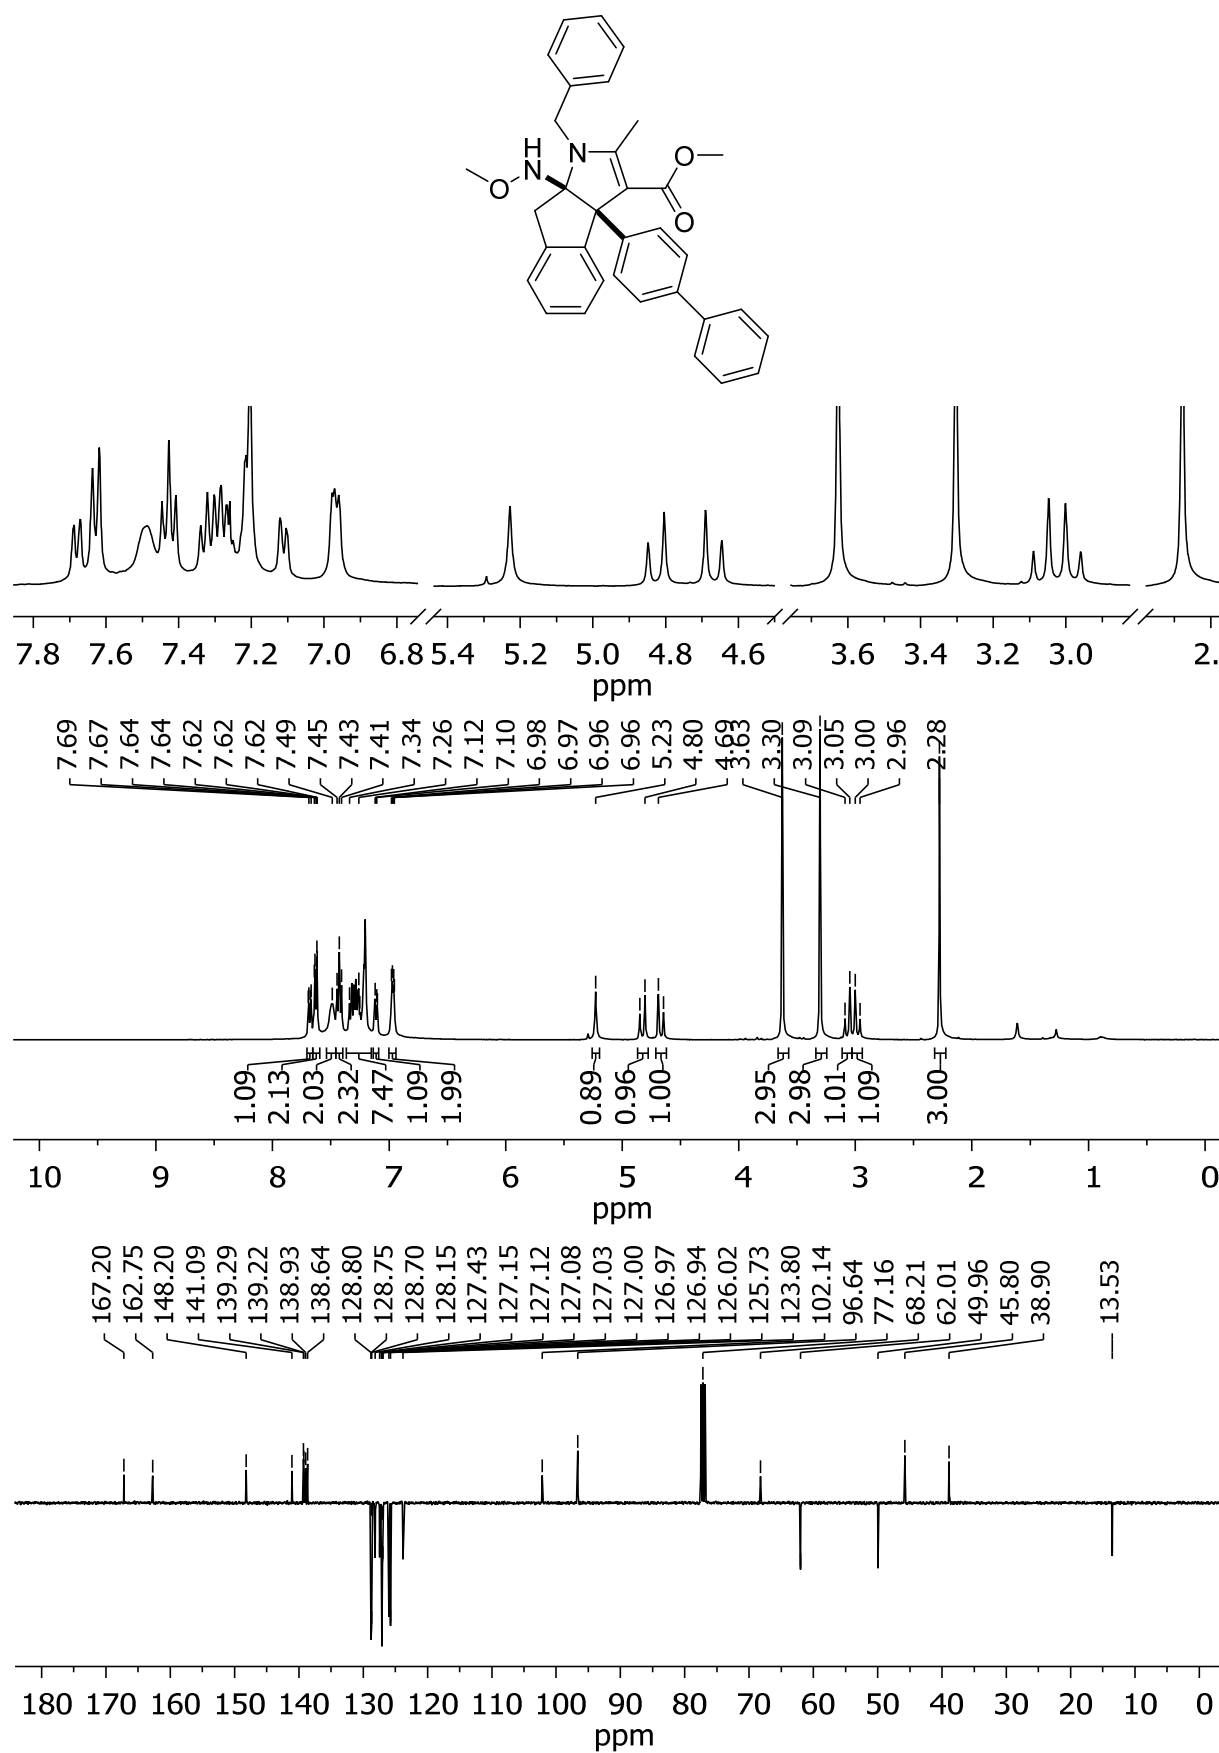

**Tetrahydroindeno[2,1-*b*]pyrrole 3h** (CDCl<sub>3</sub>, <sup>1</sup>H-NMR: 300 MHz, APT: 75 MHz)

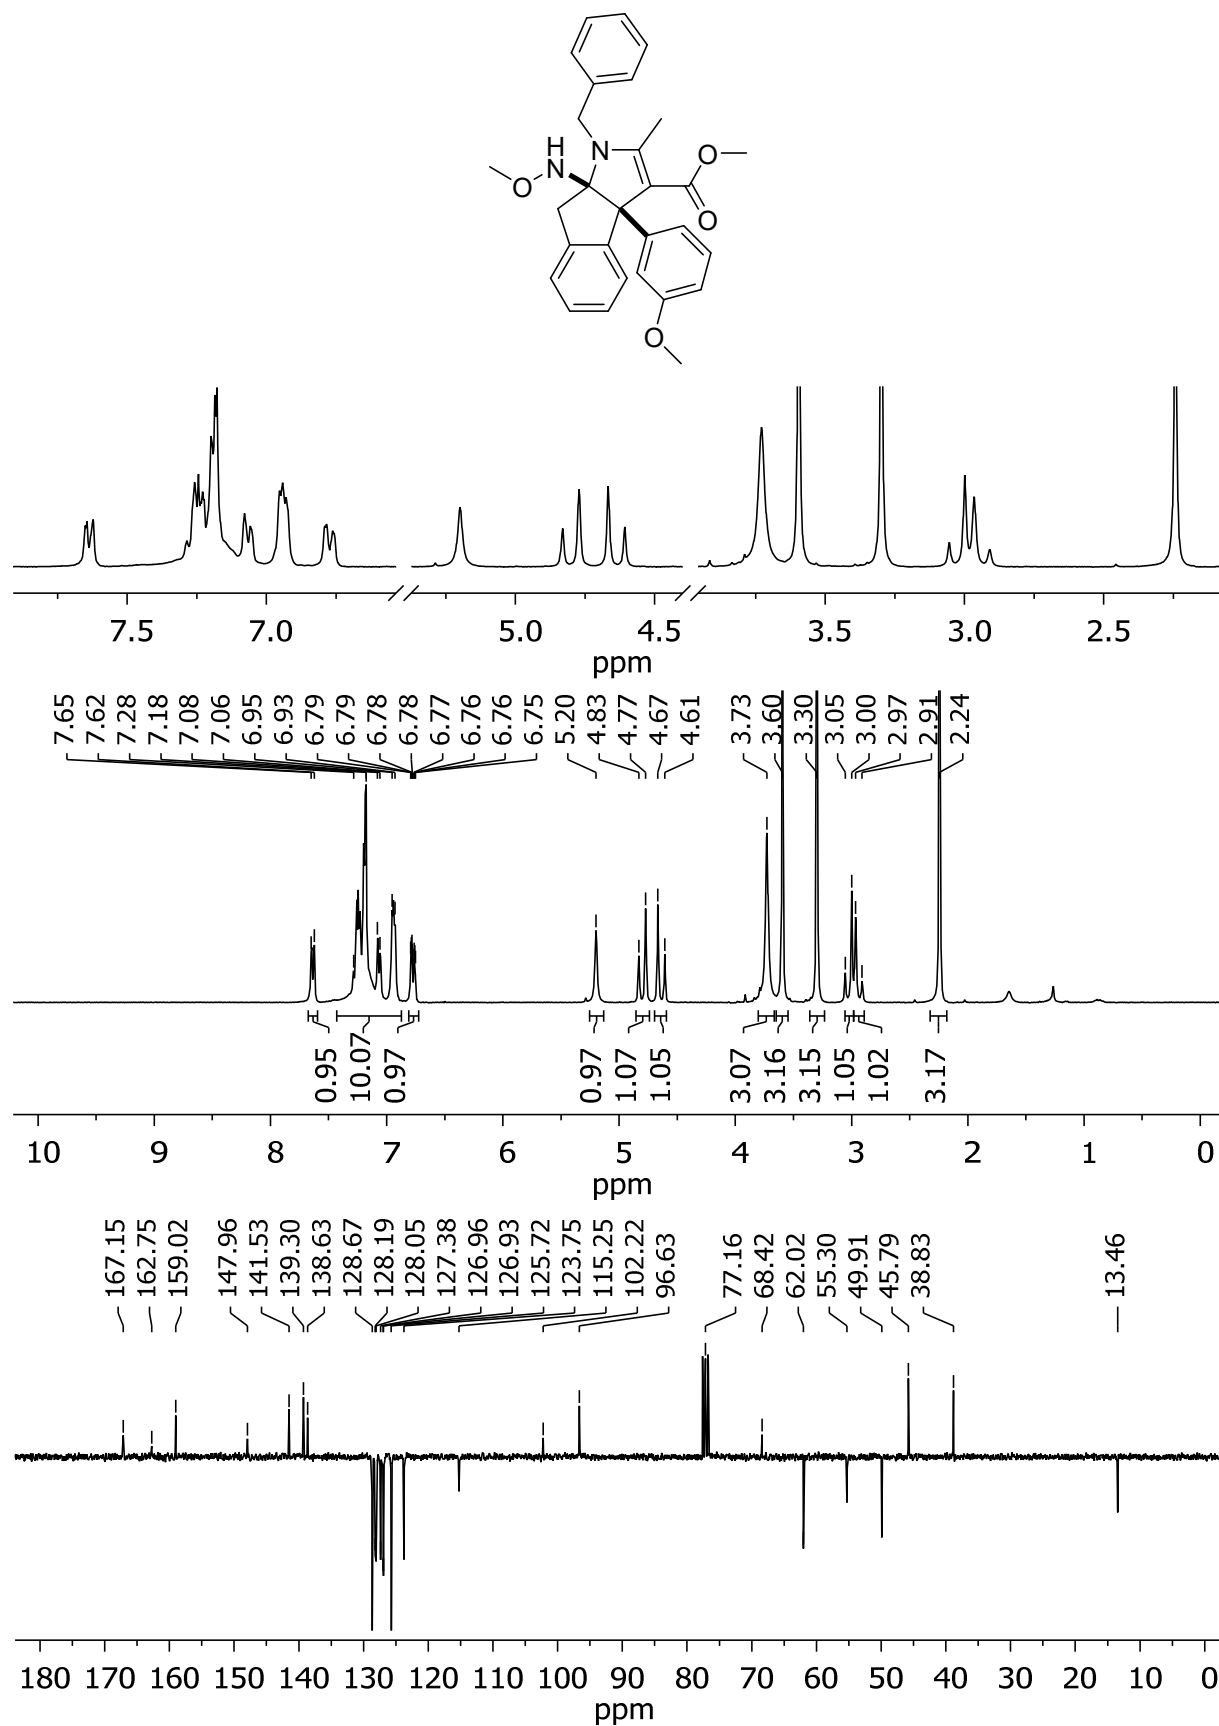

**Tetrahydroindeno[2,1-*b*]pyrrole 3i** (CDCl<sub>3</sub>, <sup>1</sup>H-NMR: 400 MHz, APT: 100 MHz)

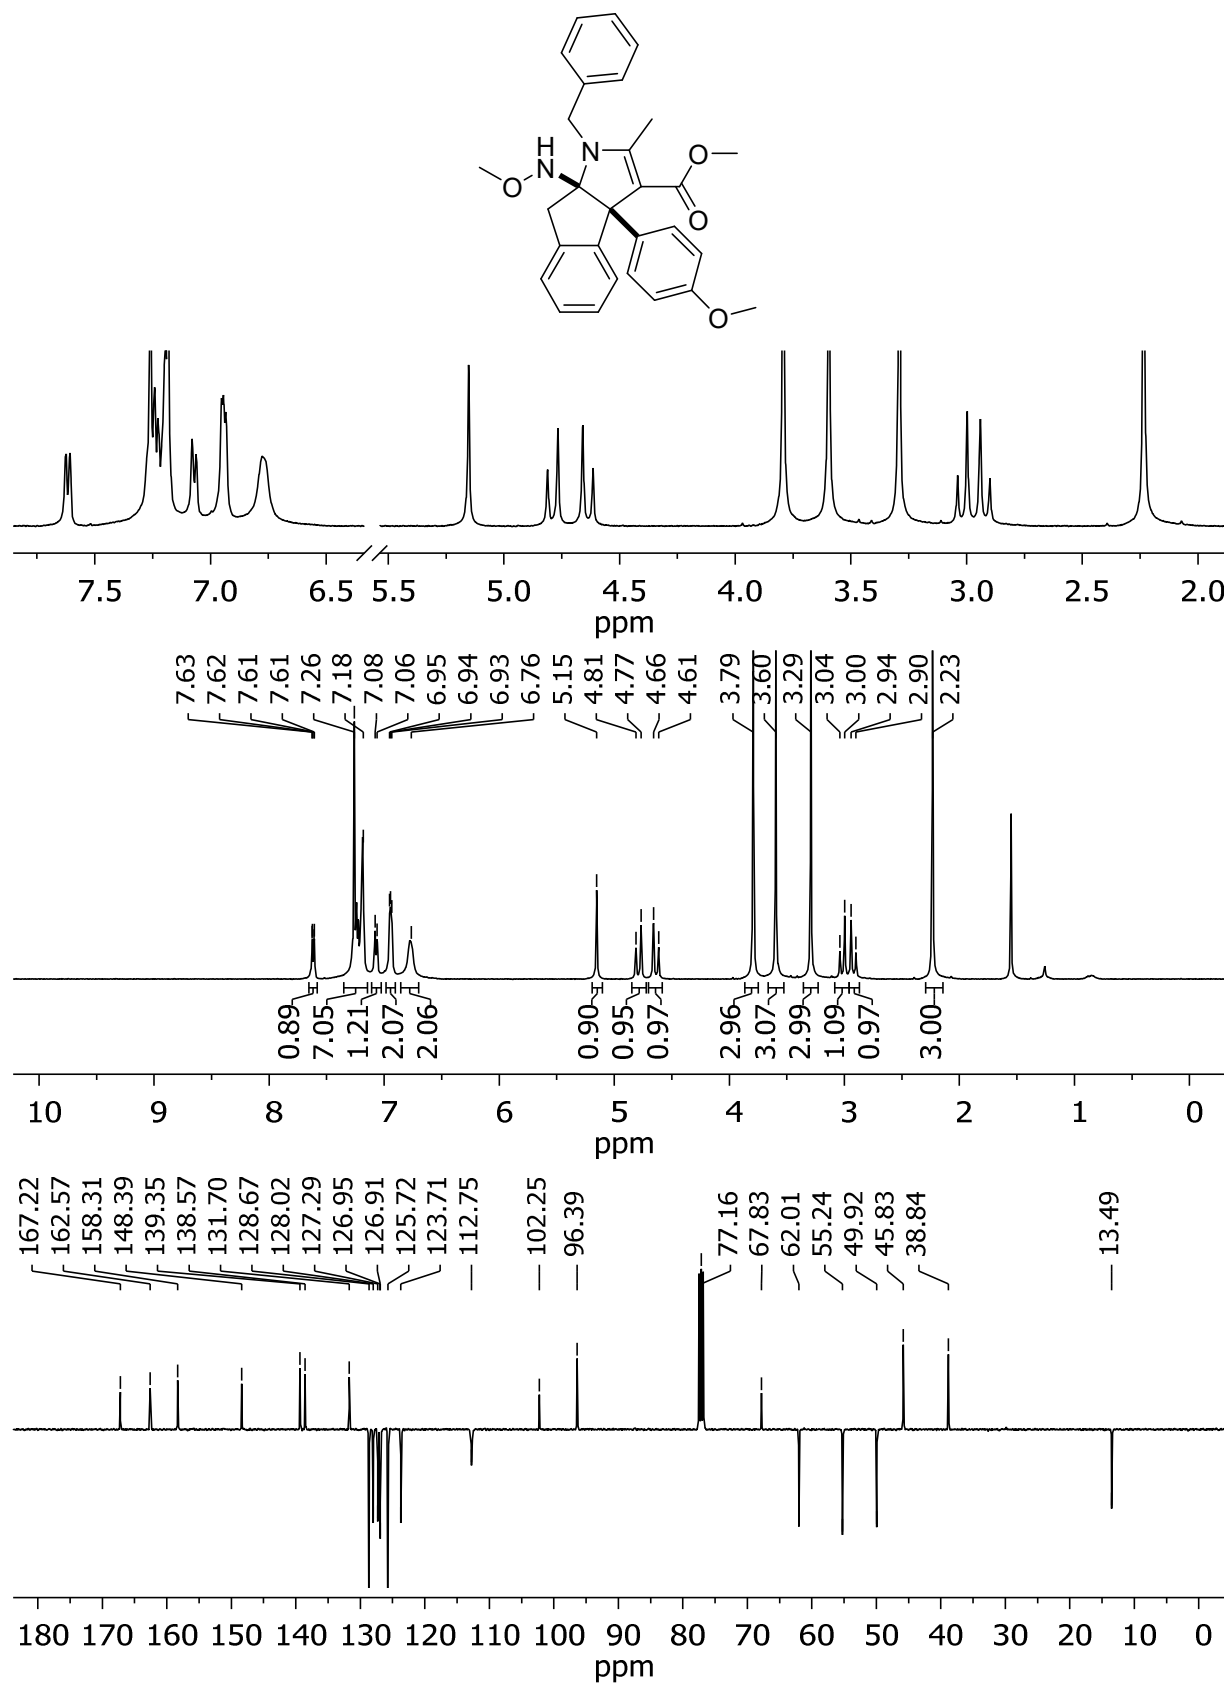

**Tetrahydroindeno[2,1-*b*]pyrrole 3j** (CDCl<sub>3</sub>, <sup>1</sup>H-NMR: 300 MHz, APT: 75 MHz)

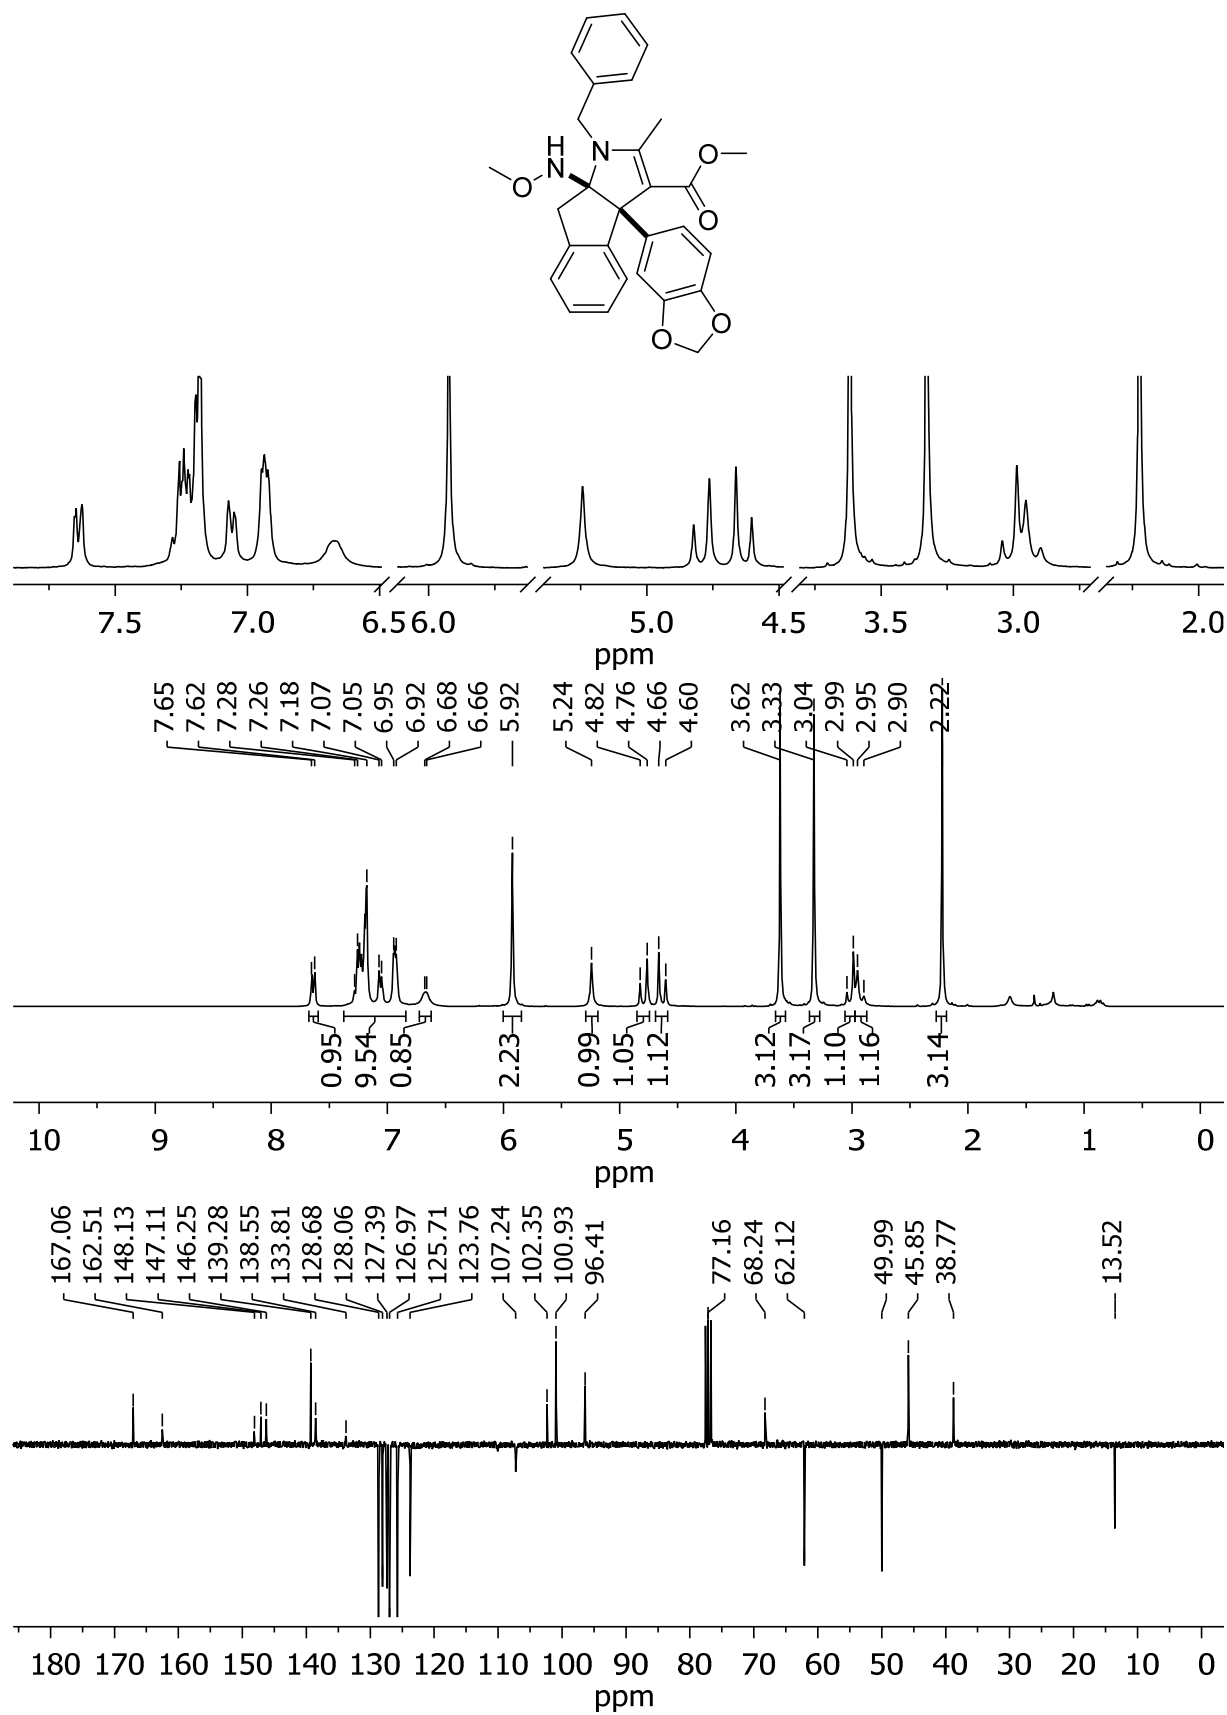

**Tetrahydroindeno[2,1-*b*]pyrrole 3k** (CDCl<sub>3</sub>, <sup>1</sup>H-NMR: 300 MHz, APT: 75 MHz)

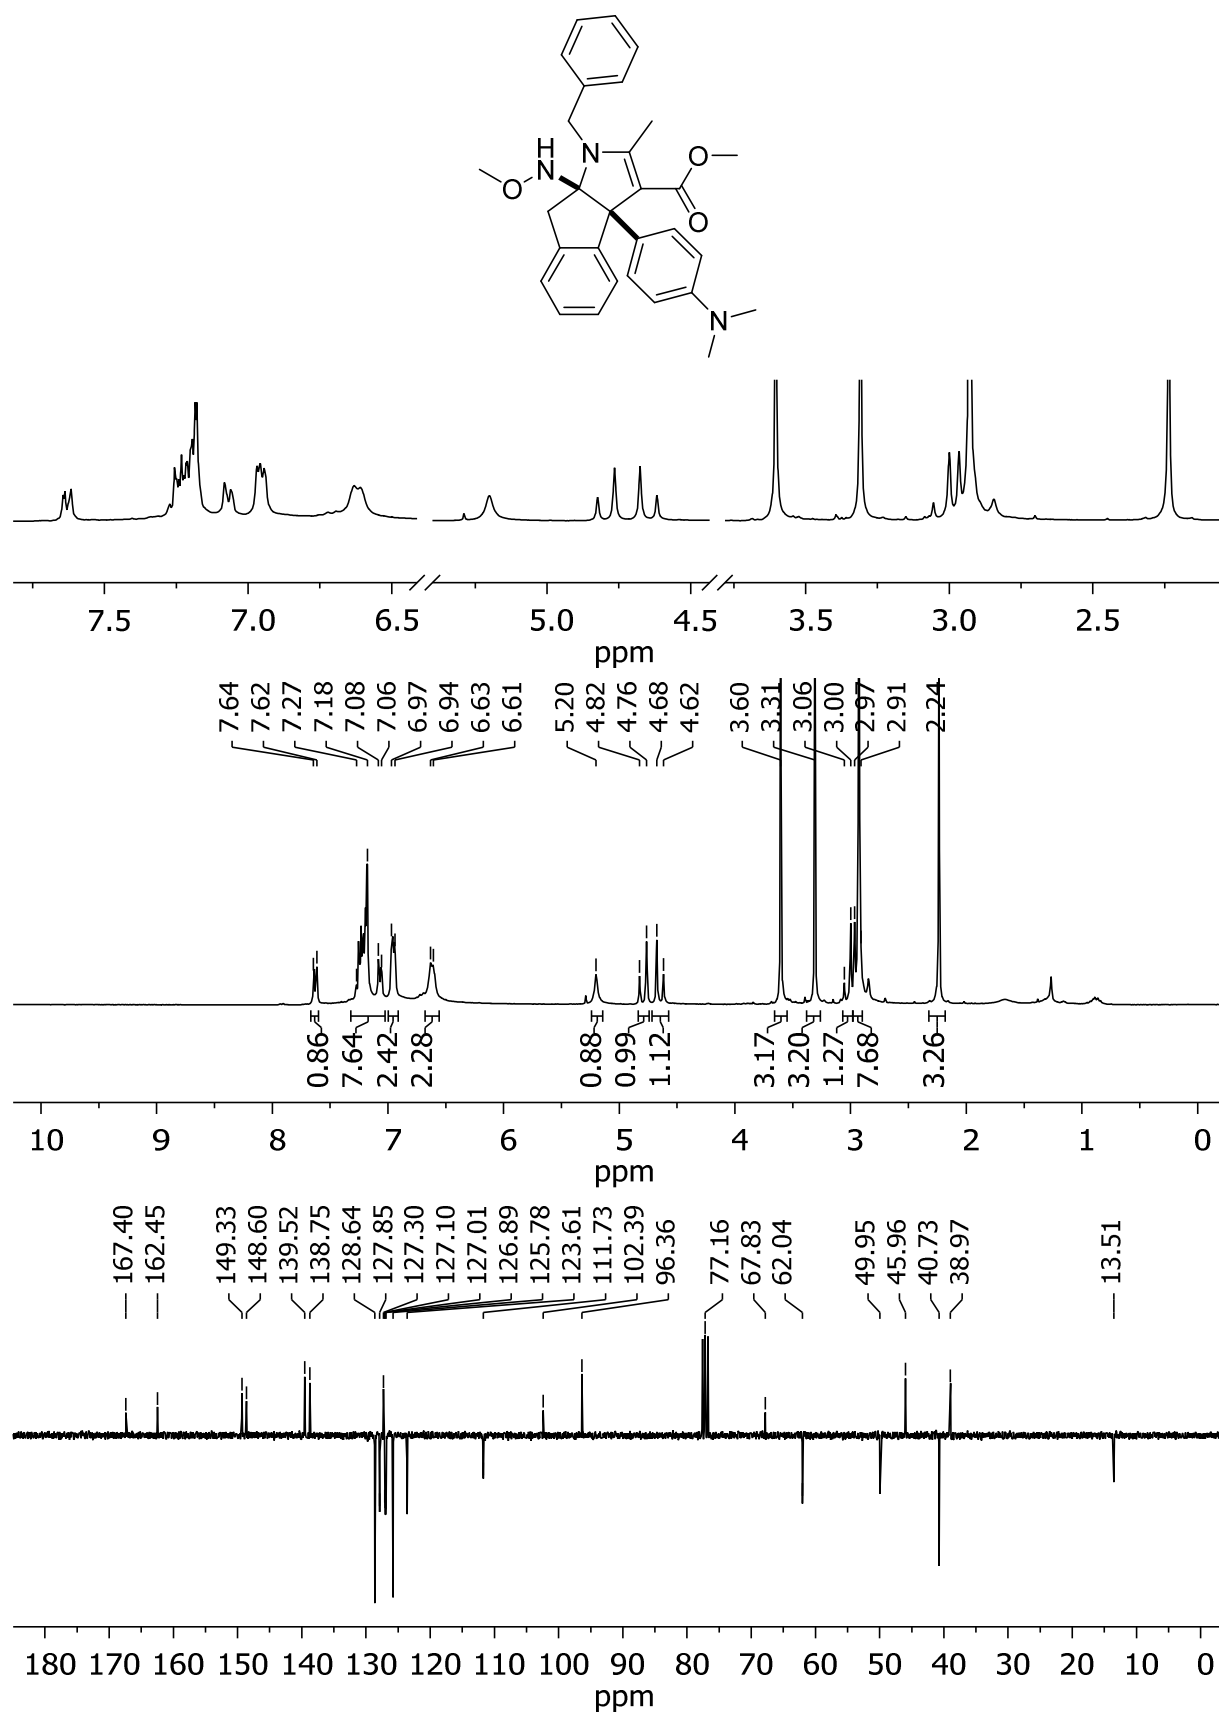



**Tetrahydroindeno[2,1-*b*]pyrrole 3l** (CDCl<sub>3</sub>, <sup>1</sup>H-NMR: 400 MHz, APT: 100 MHz)

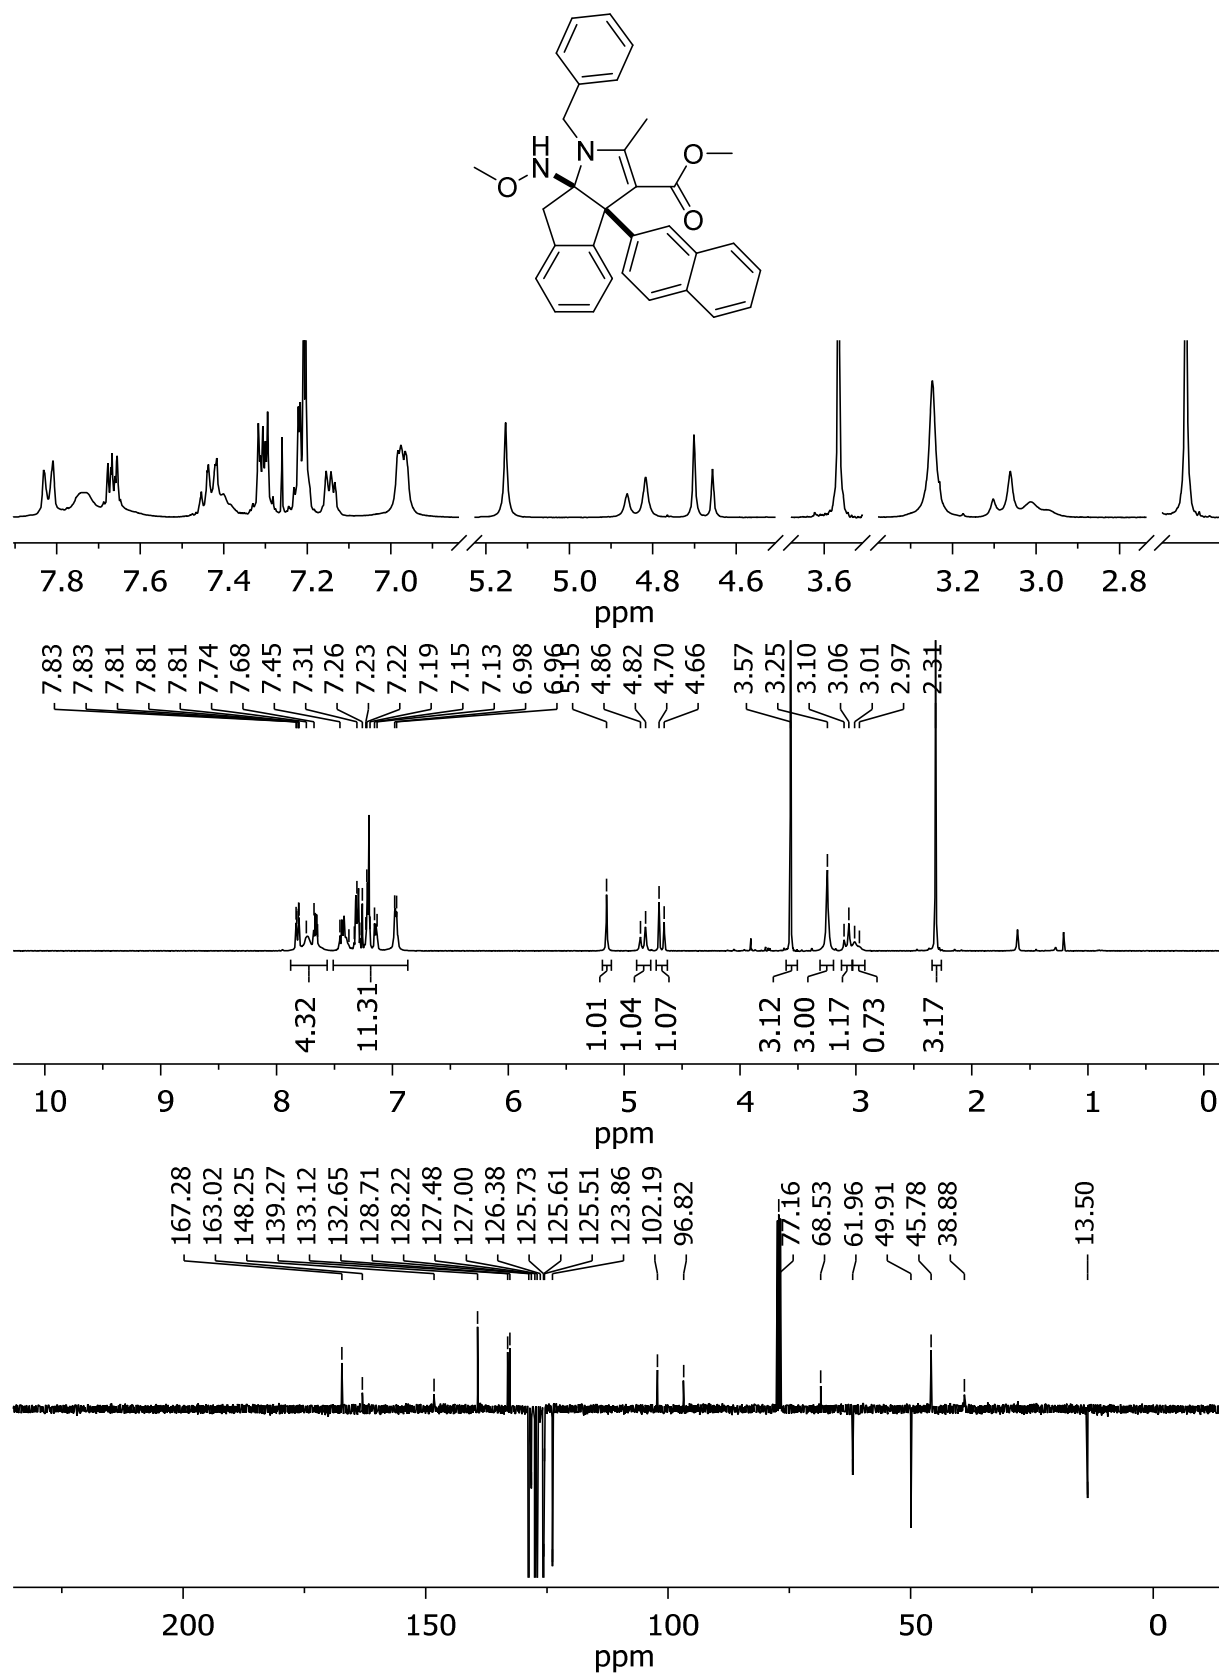

**Tetrahydroindeno[2,1-*b*]pyrrole 3m** (CDCl<sub>3</sub>, <sup>1</sup>H-NMR: 300 MHz, APT: 75 MHz)

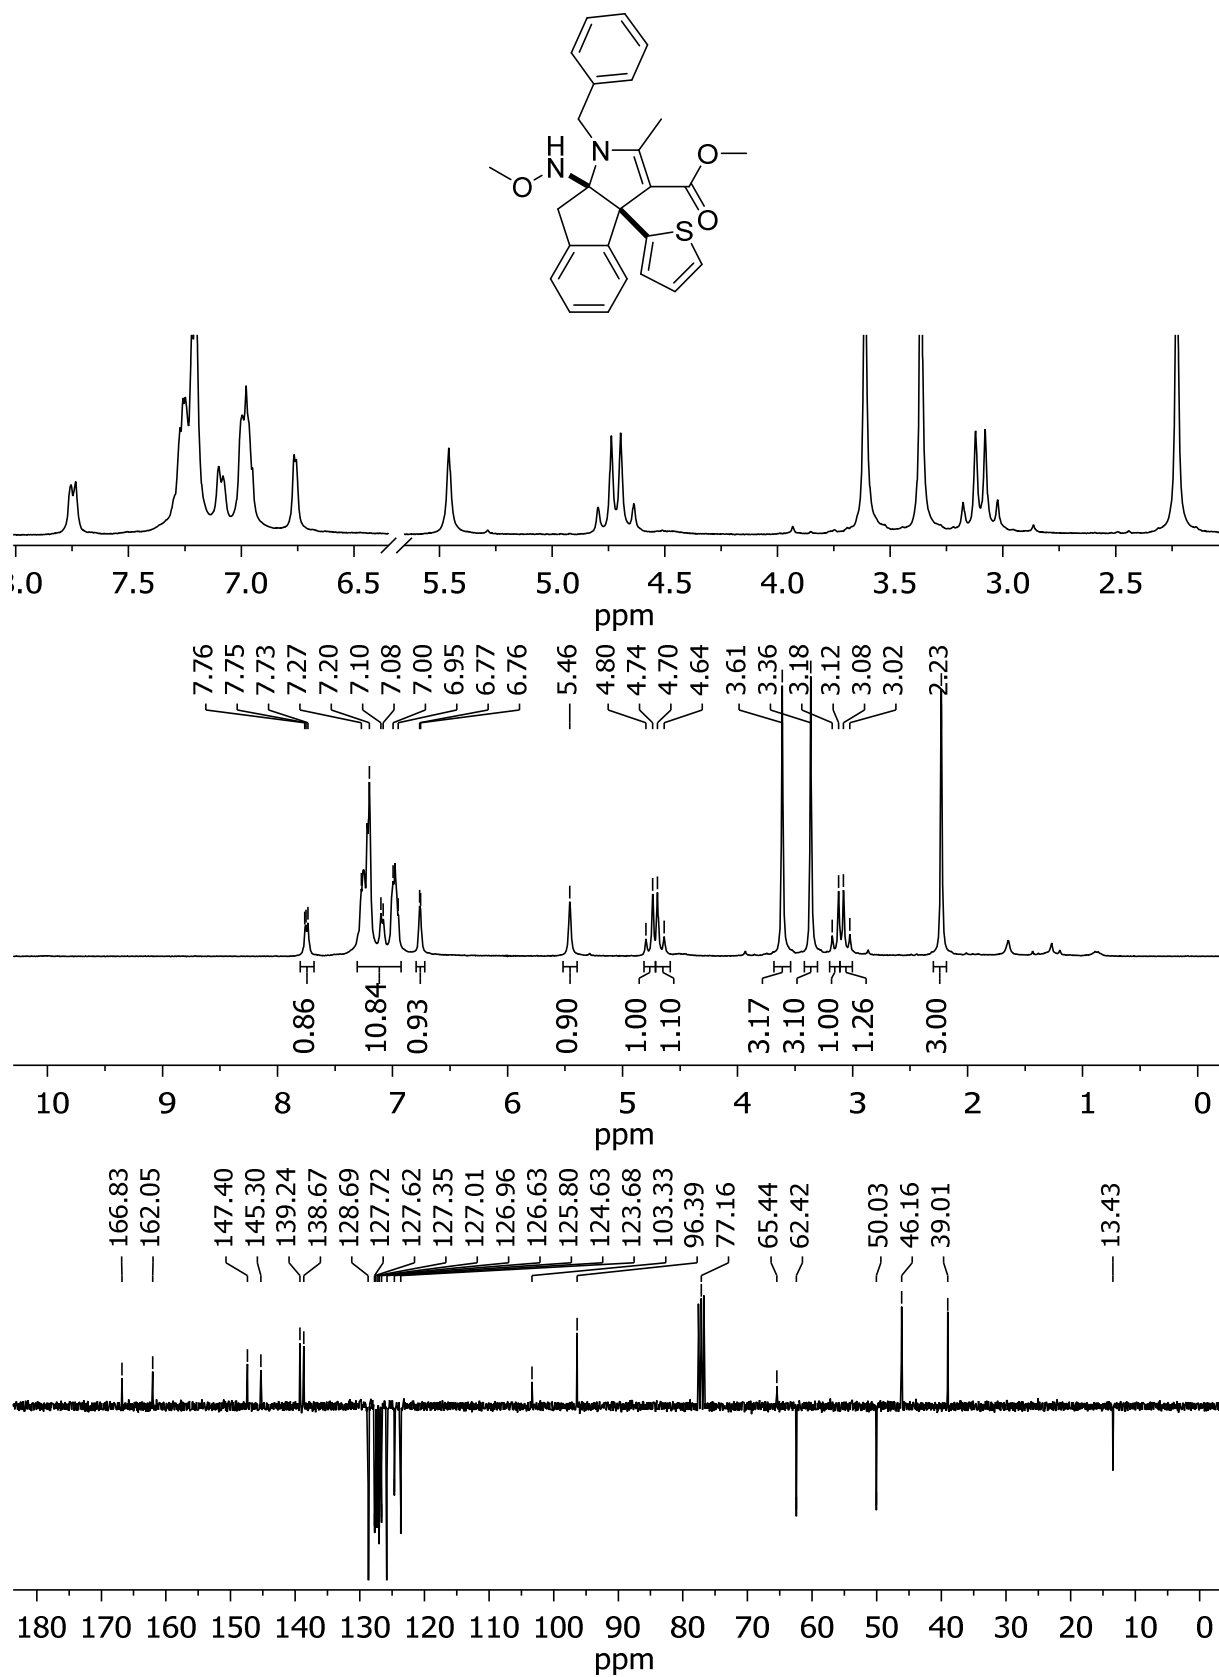

**Tetrahydroindeno[2,1-*b*]pyrrole 3n** (CDCl<sub>3</sub>, <sup>1</sup>H-NMR: 300 MHz, APT: 75 MHz)

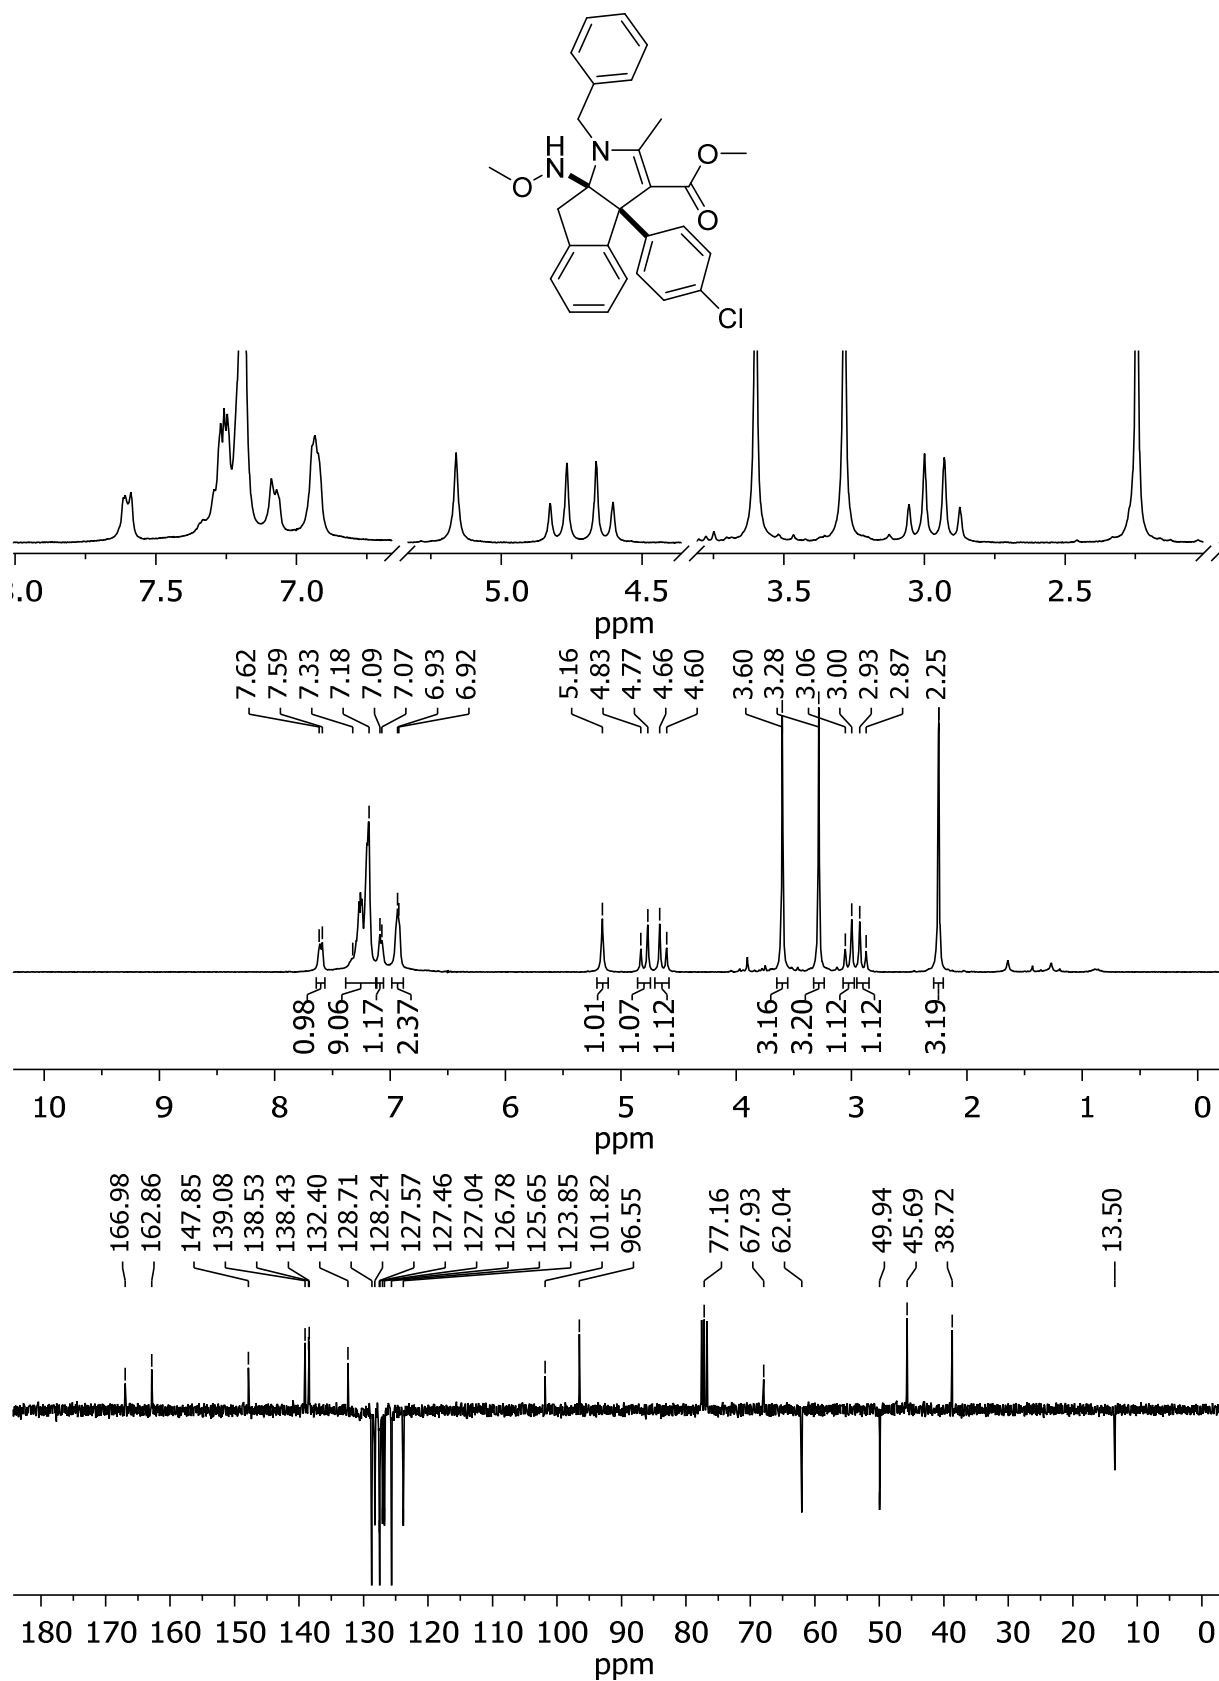

**Tetrahydroindeno[2,1-*b*]pyrrole 3o** (CDCl<sub>3</sub>, <sup>1</sup>H-NMR: 400 MHz, APT: 100 MHz)

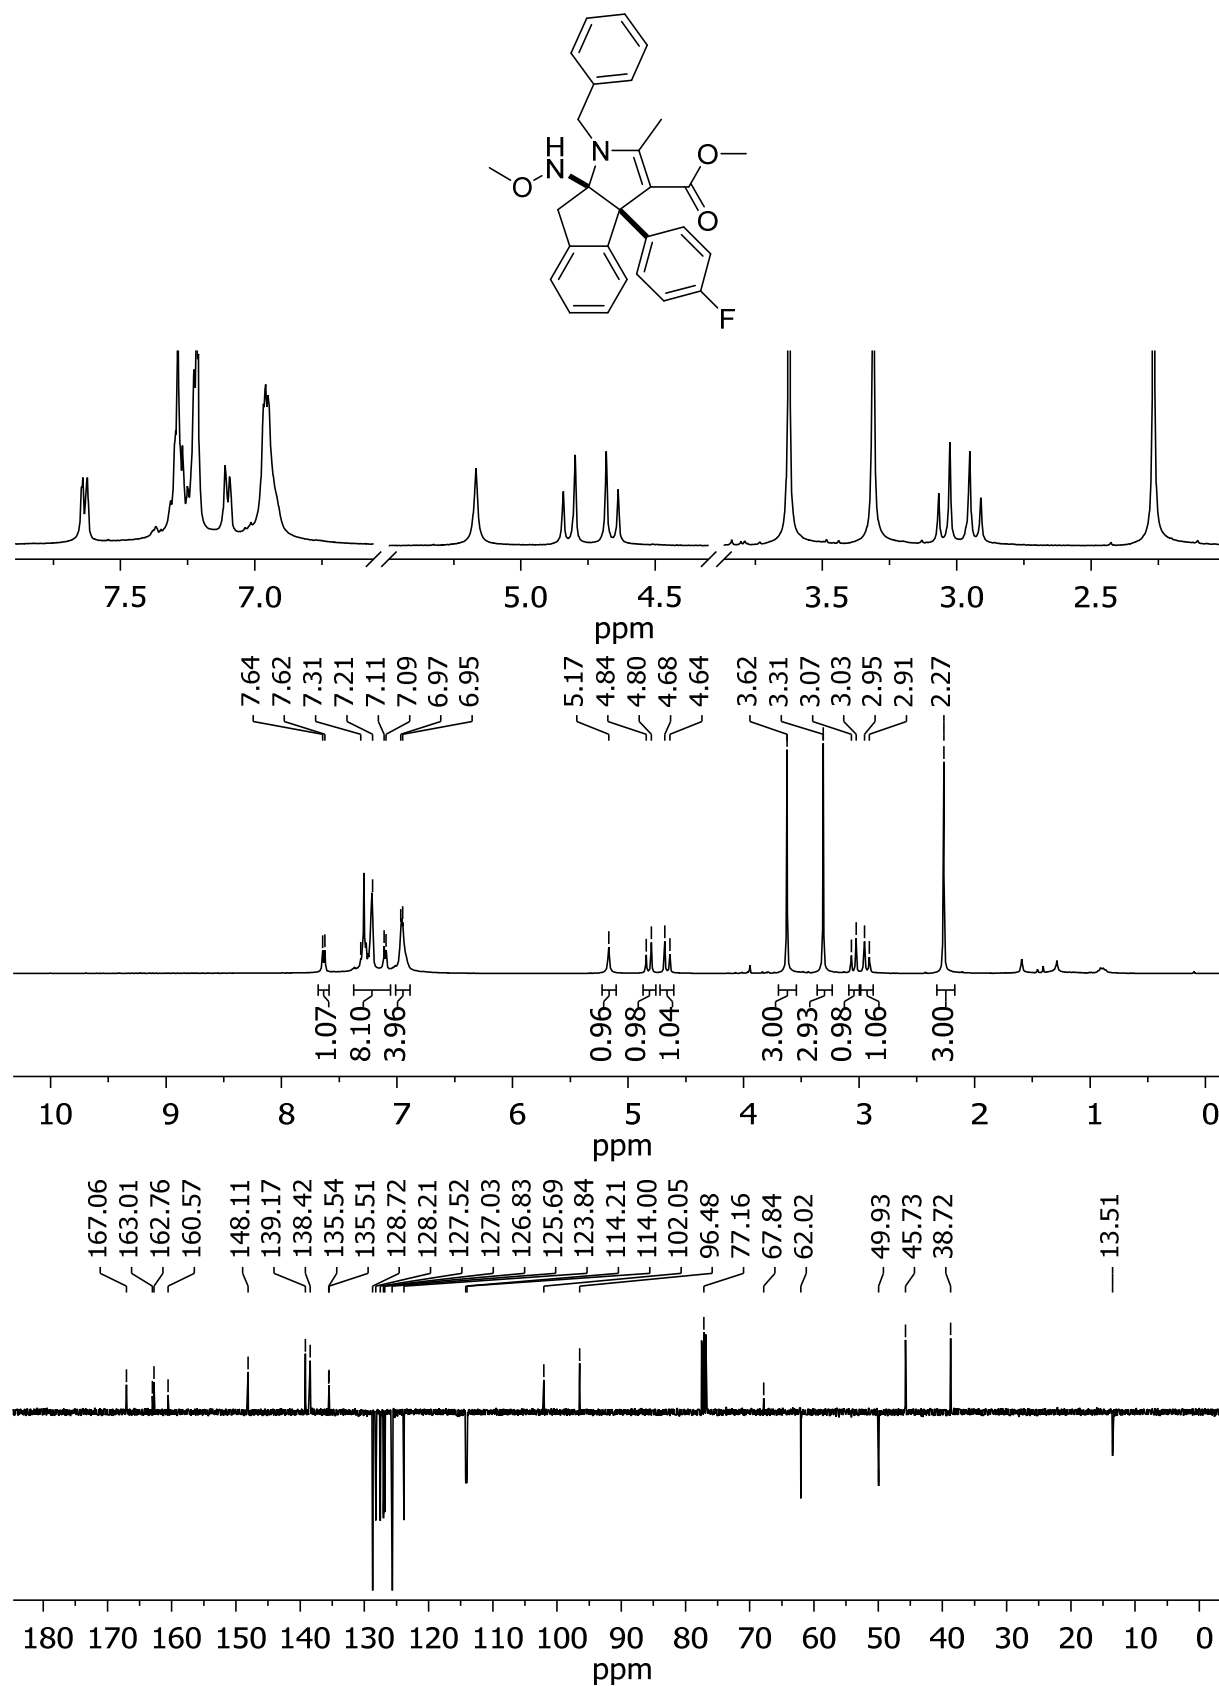

**Tetrahydroindeno[2,1-*b*]pyrrole 3p** (CDCl<sub>3</sub>, <sup>1</sup>H-NMR: 400 MHz, APT: 100 MHz)

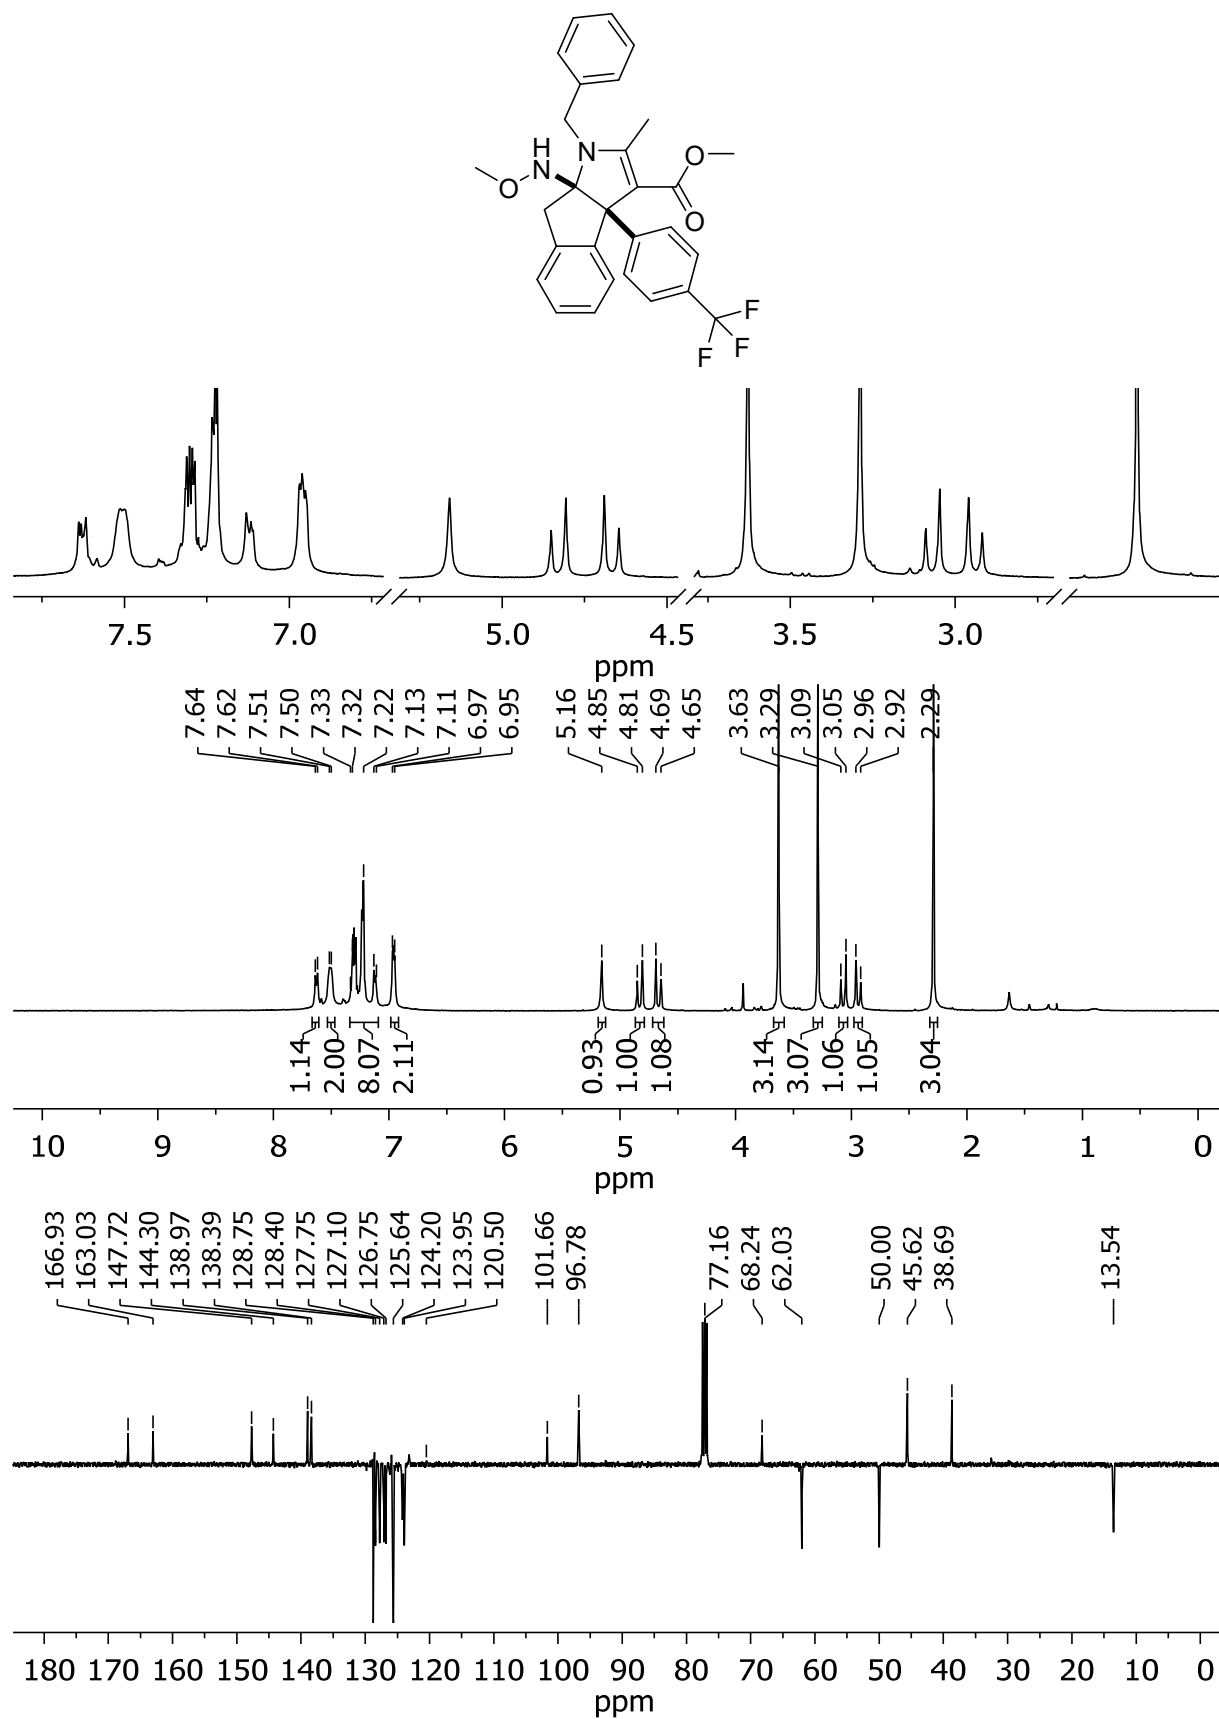

**Tetrahydroindeno[2,1-*b*]pyrrole 3q** (CDCl<sub>3</sub>, <sup>1</sup>H-NMR: 300 MHz, APT: 100 MHz)

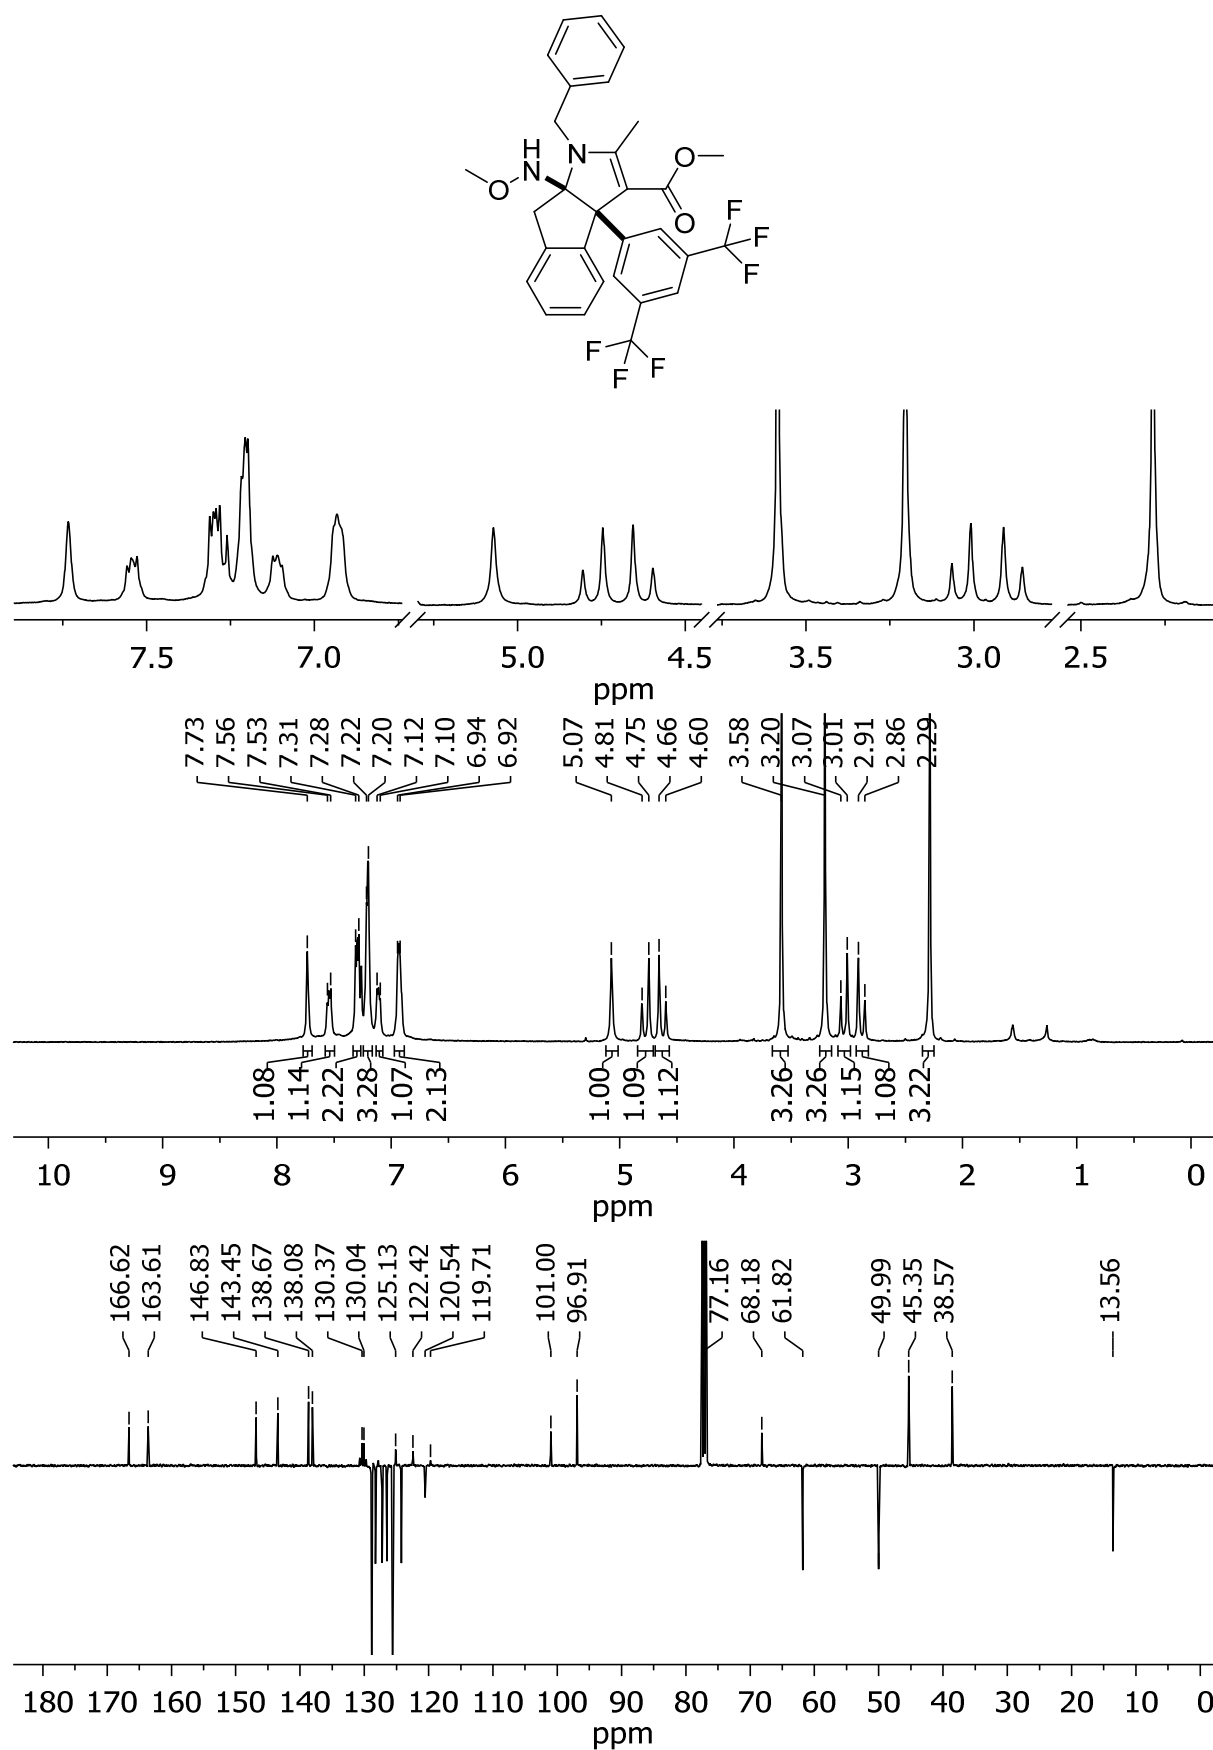

**Tetrahydroindeno[2,1-*b*]pyrrole 3r** (CDCl<sub>3</sub>, <sup>1</sup>H-NMR: 400 MHz, APT: 100 MHz)

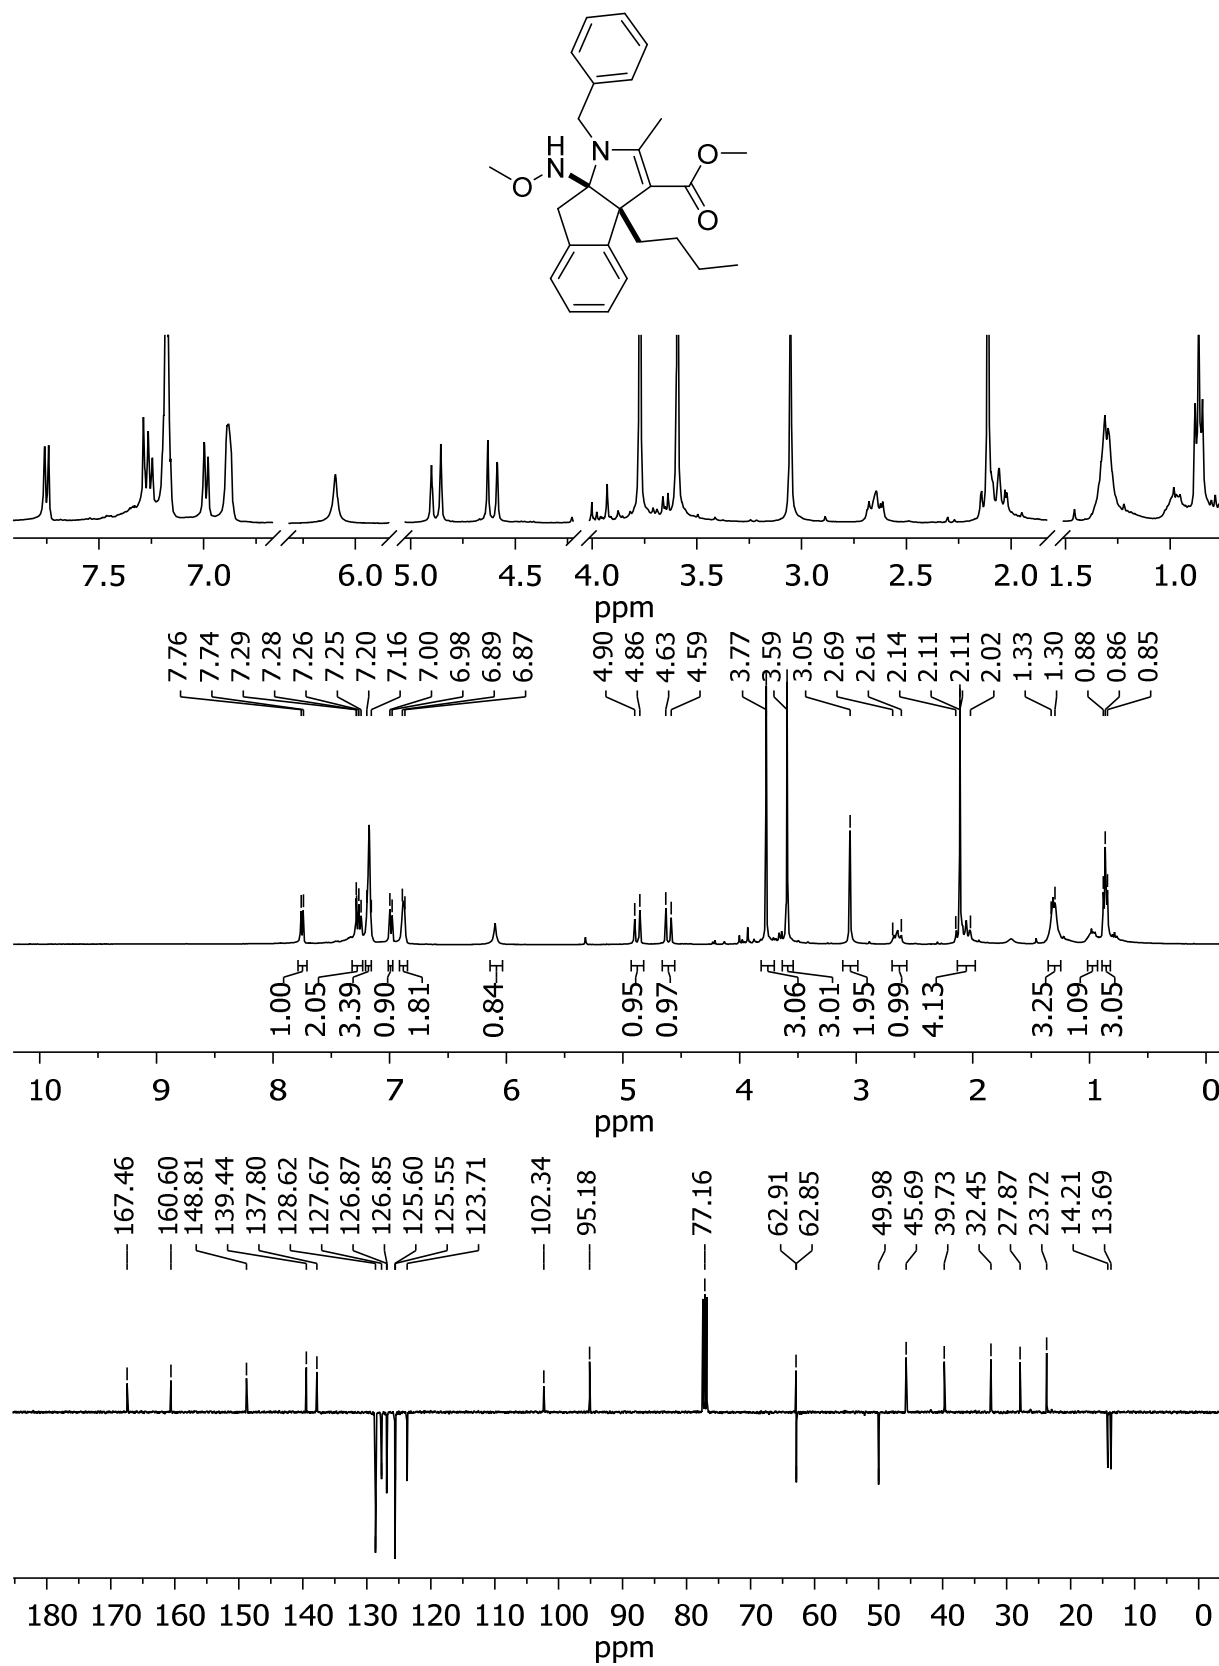

**Tetrahydroindeno[2,1-*b*]pyrrole 3s** (CDCl<sub>3</sub>, <sup>1</sup>H-NMR: 300 MHz, APT: 75 MHz)

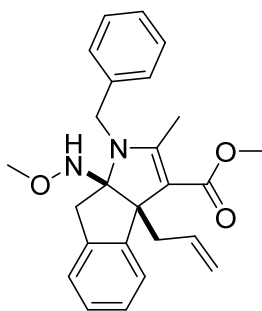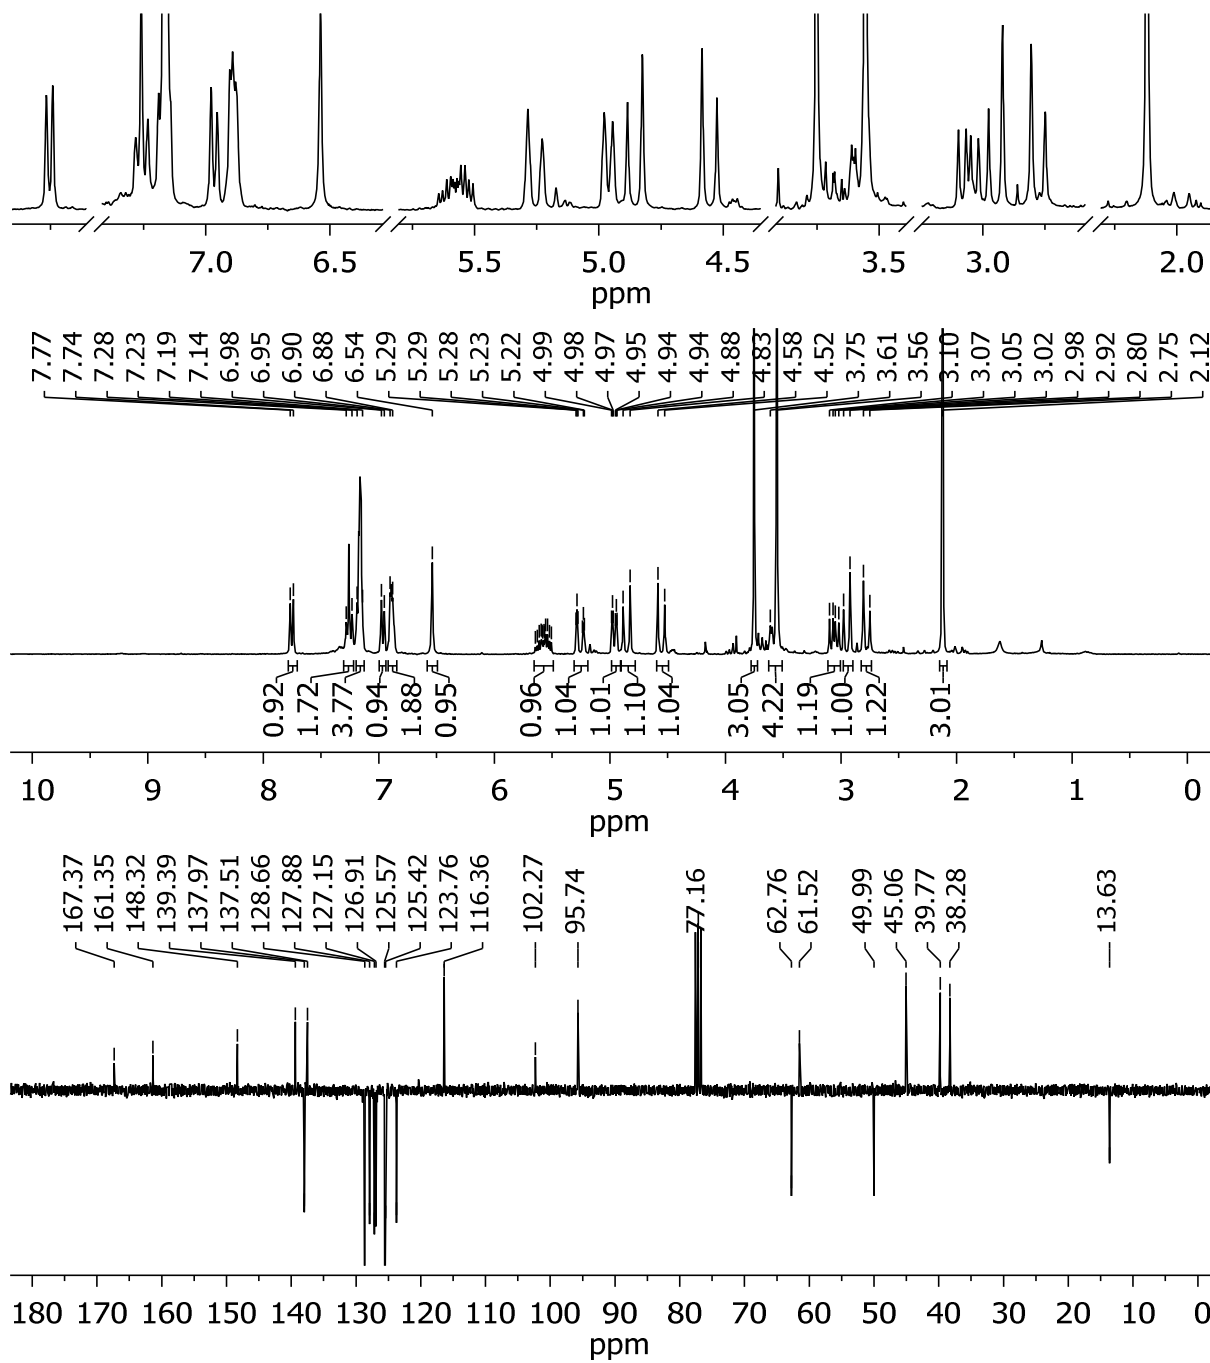



**Tetrahydroindeno[2,1-*b*]pyrrole 3t** (CDCl<sub>3</sub>, <sup>1</sup>H-NMR: 300 MHz, APT: 75 MHz)

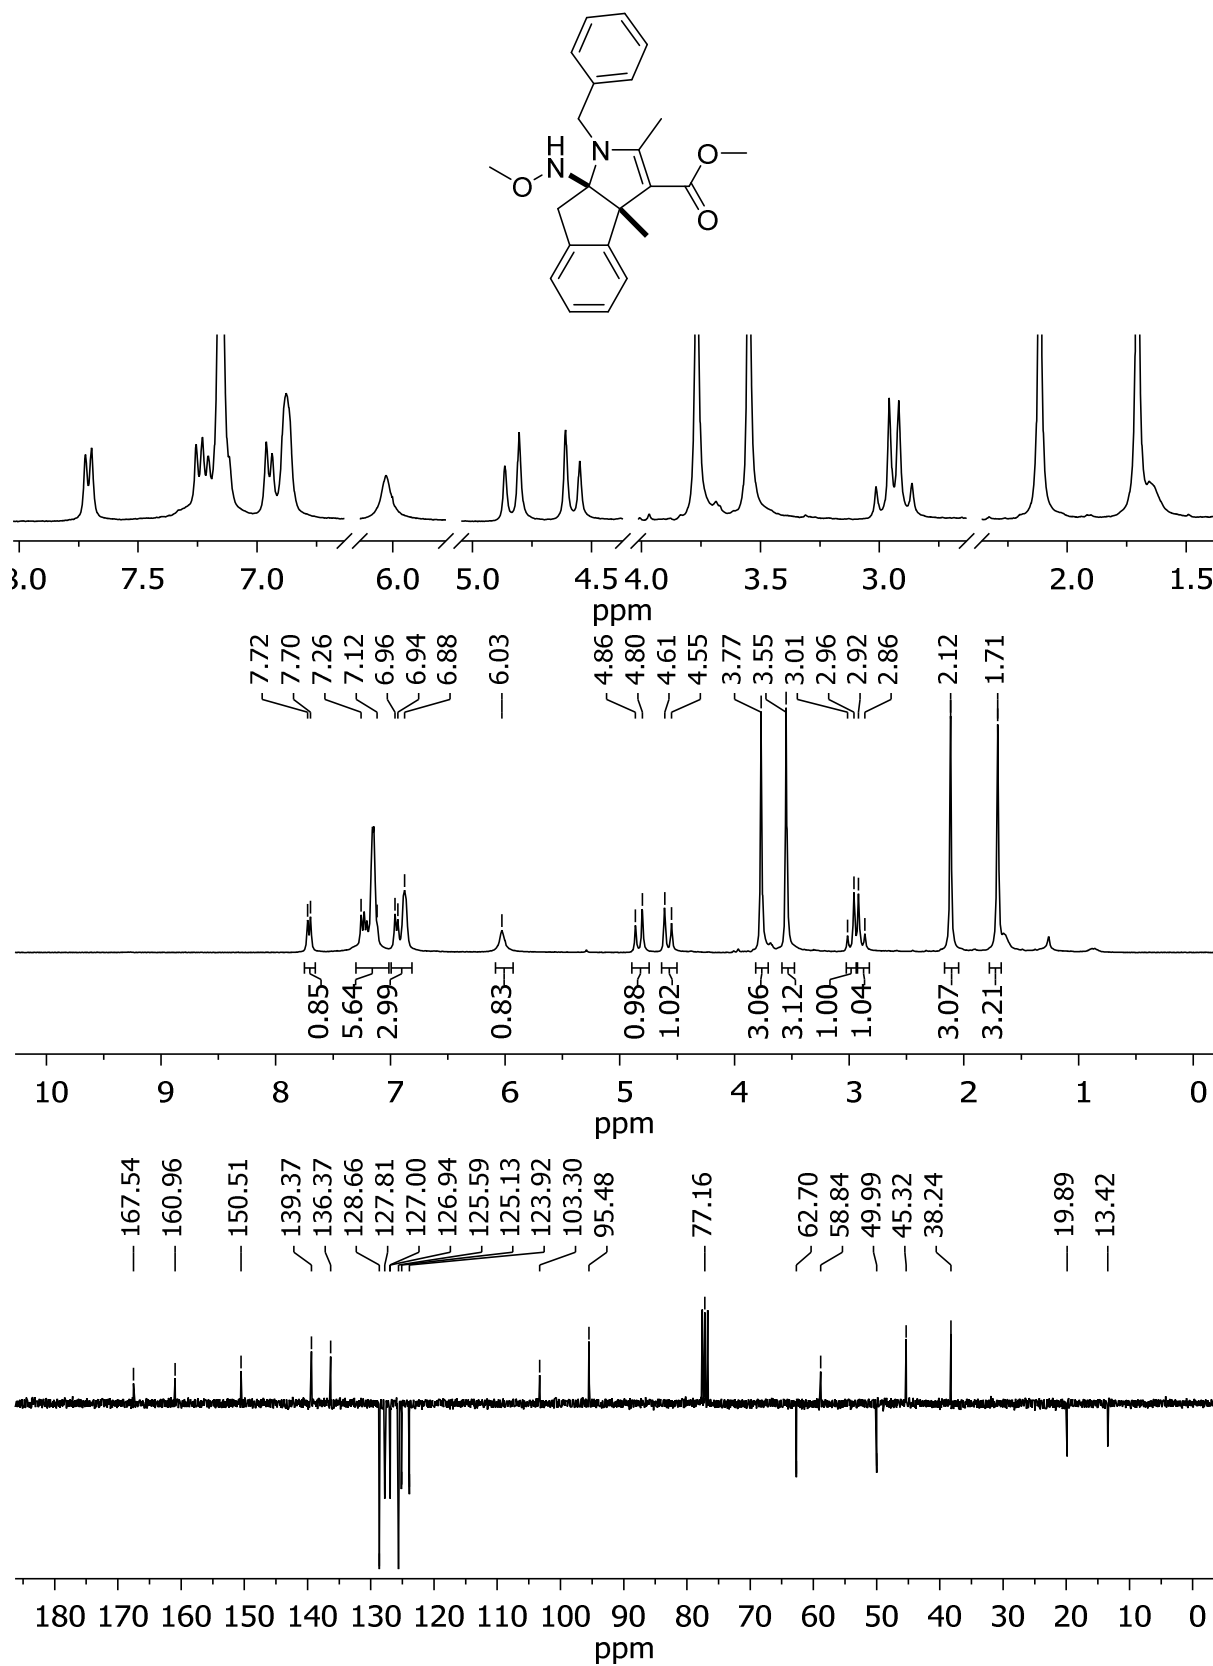

**Tetrahydroindeno[2,1-*b*]pyrrole 3u** (CDCl<sub>3</sub>, <sup>1</sup>H-NMR: 400 MHz, APT: 100 MHz)

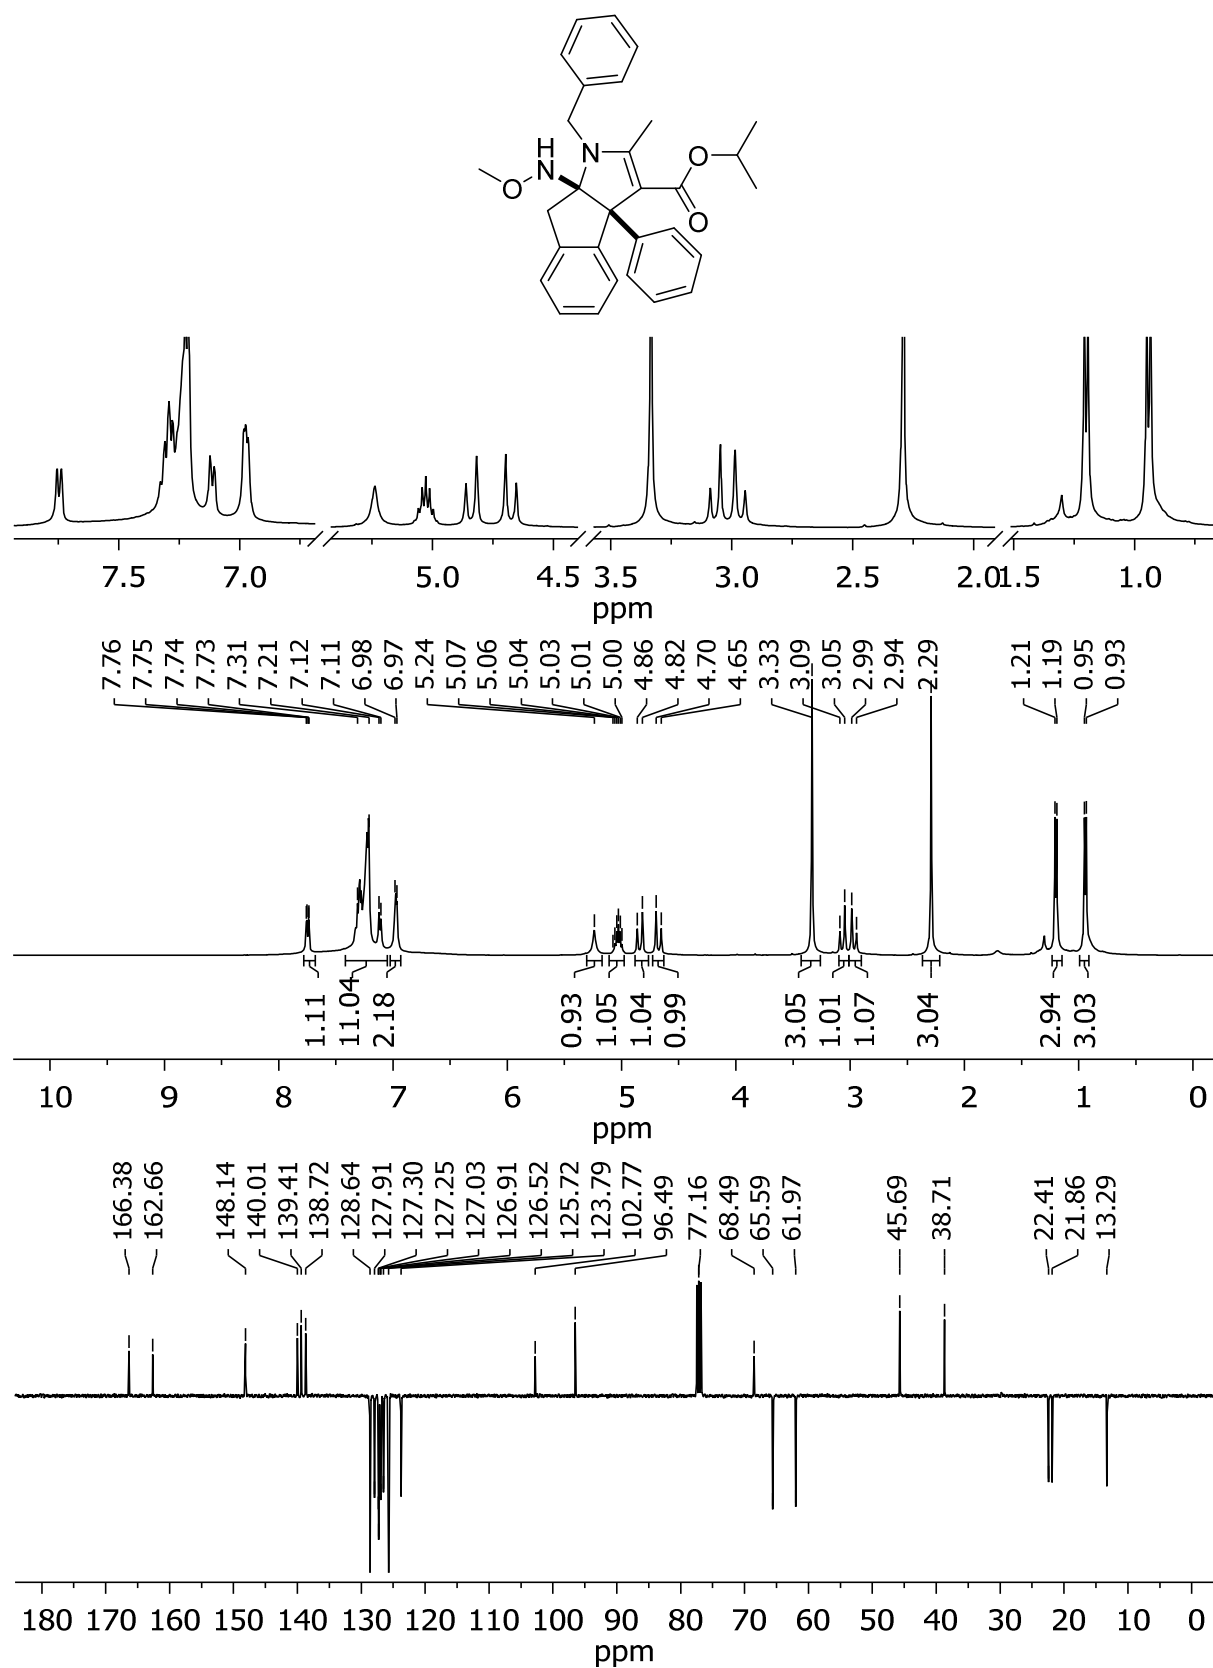

**Tetrahydroindeno[2,1-*b*]pyrrole 3v** (CDCl<sub>3</sub>, <sup>1</sup>H-NMR: 300 MHz, APT: 75 MHz)

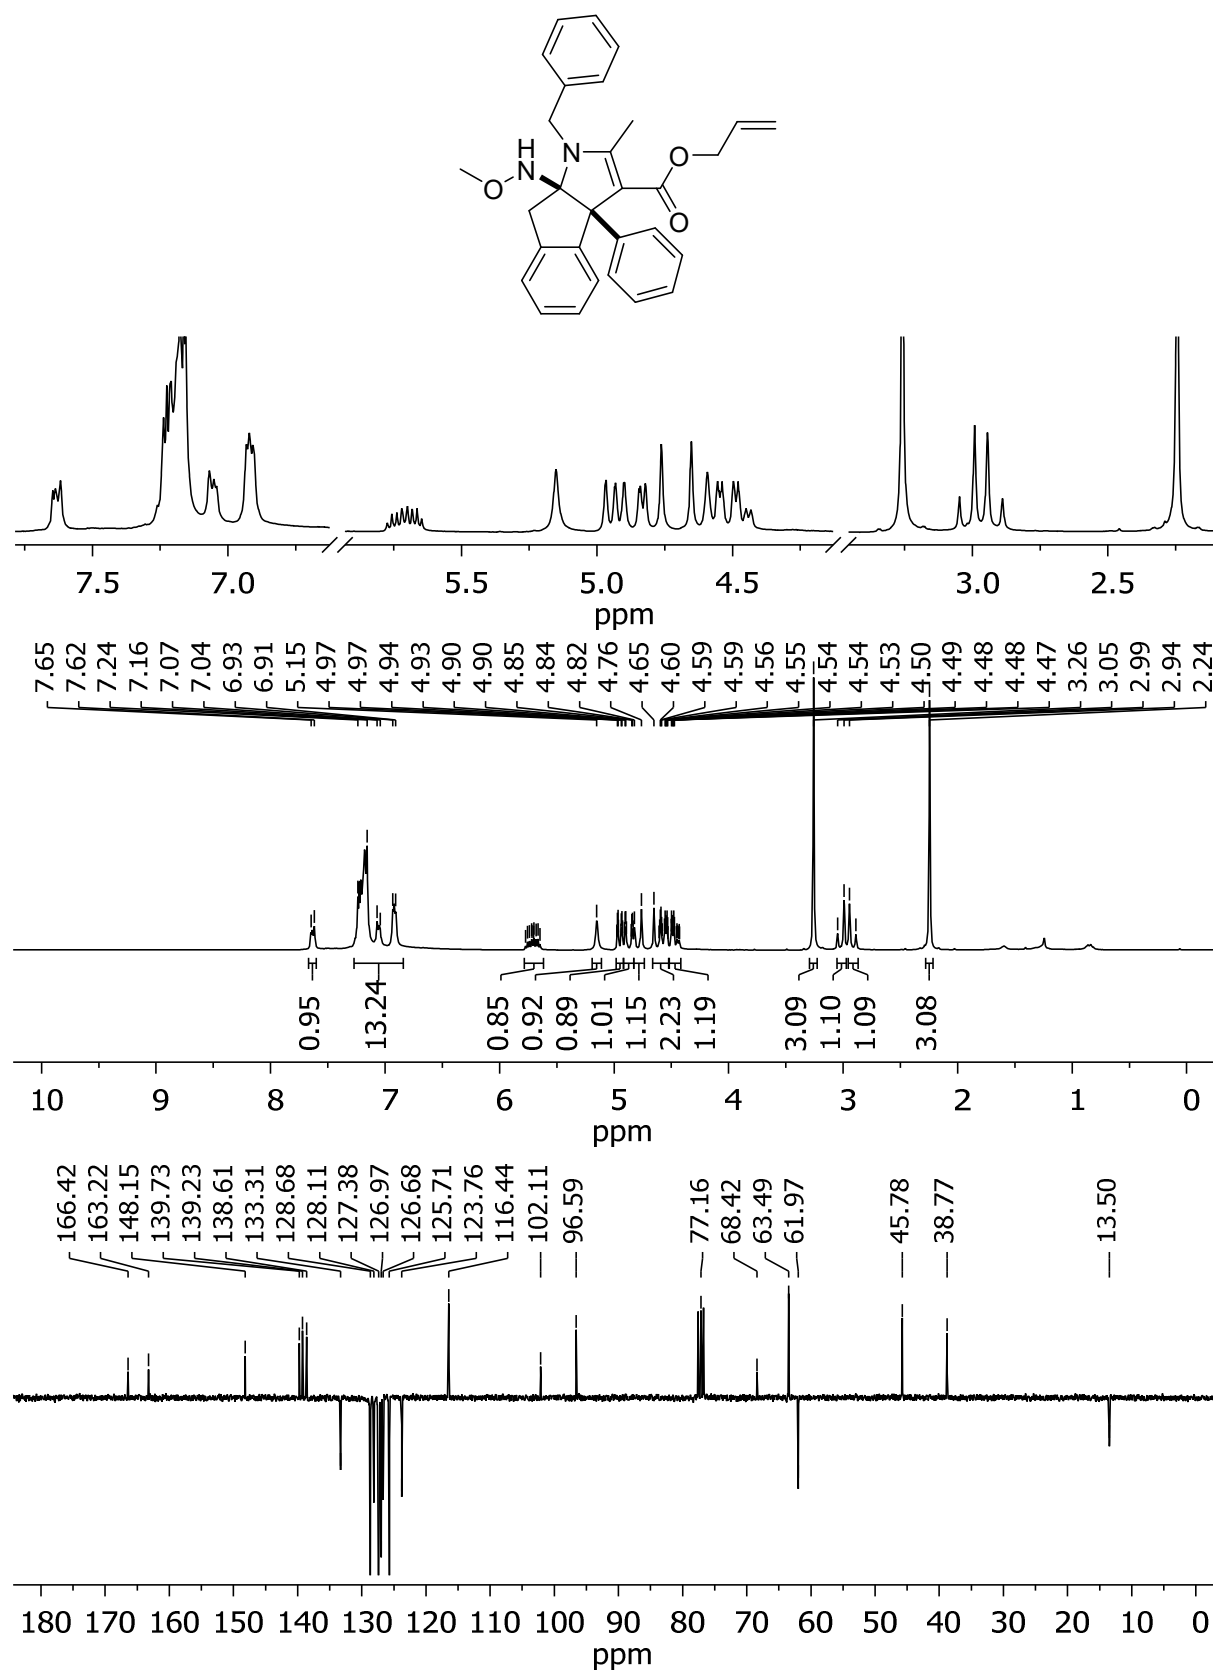

**Tetrahydroindeno[2,1-*b*]pyrrole 3w** (CDCl<sub>3</sub>, <sup>1</sup>H-NMR: 300 MHz, APT: 75 MHz)

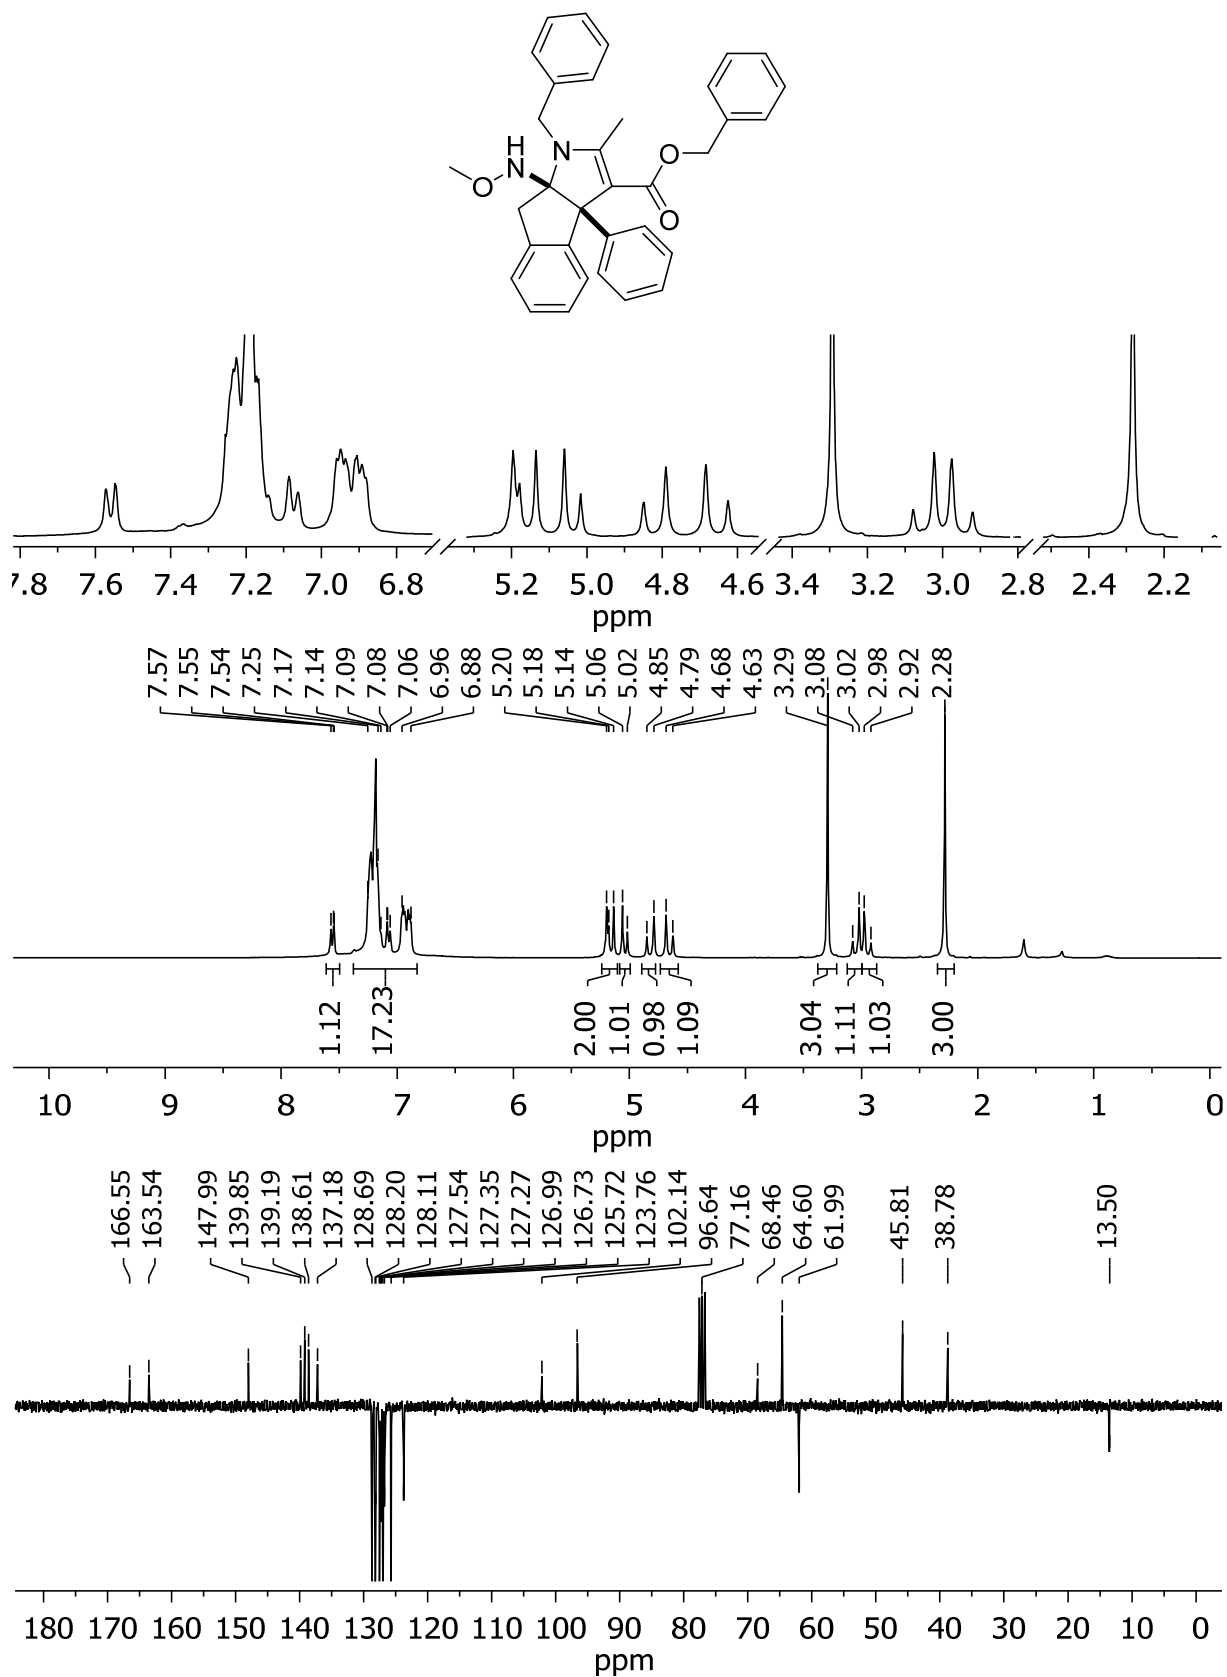

**Tetrahydroindeno[2,1-*b*]pyrrole 3x** (CDCl<sub>3</sub>, <sup>1</sup>H-NMR: 300 MHz, APT: 75 MHz)

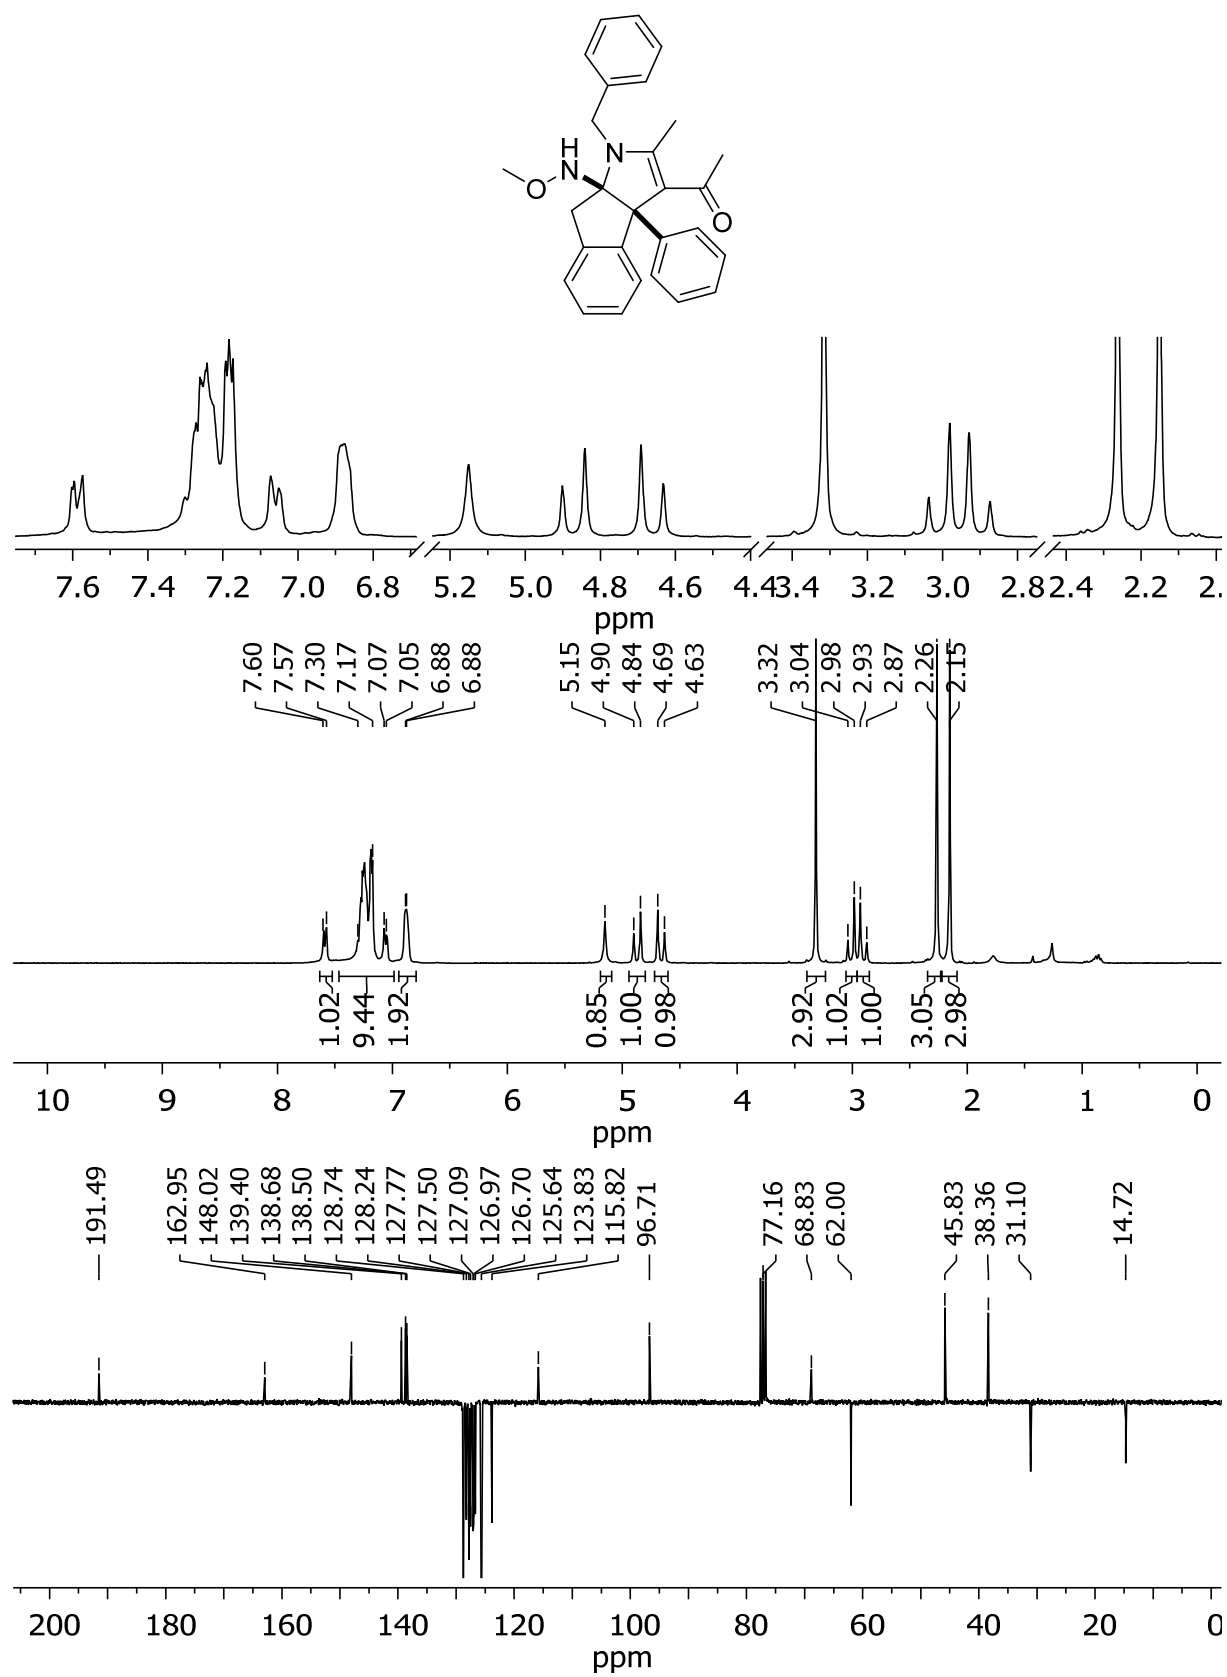

**Tetrahydroindeno[2,1-*b*]pyrrole 3y** (CDCl<sub>3</sub>, <sup>1</sup>H-NMR: 400 MHz, APT: 100 MHz)

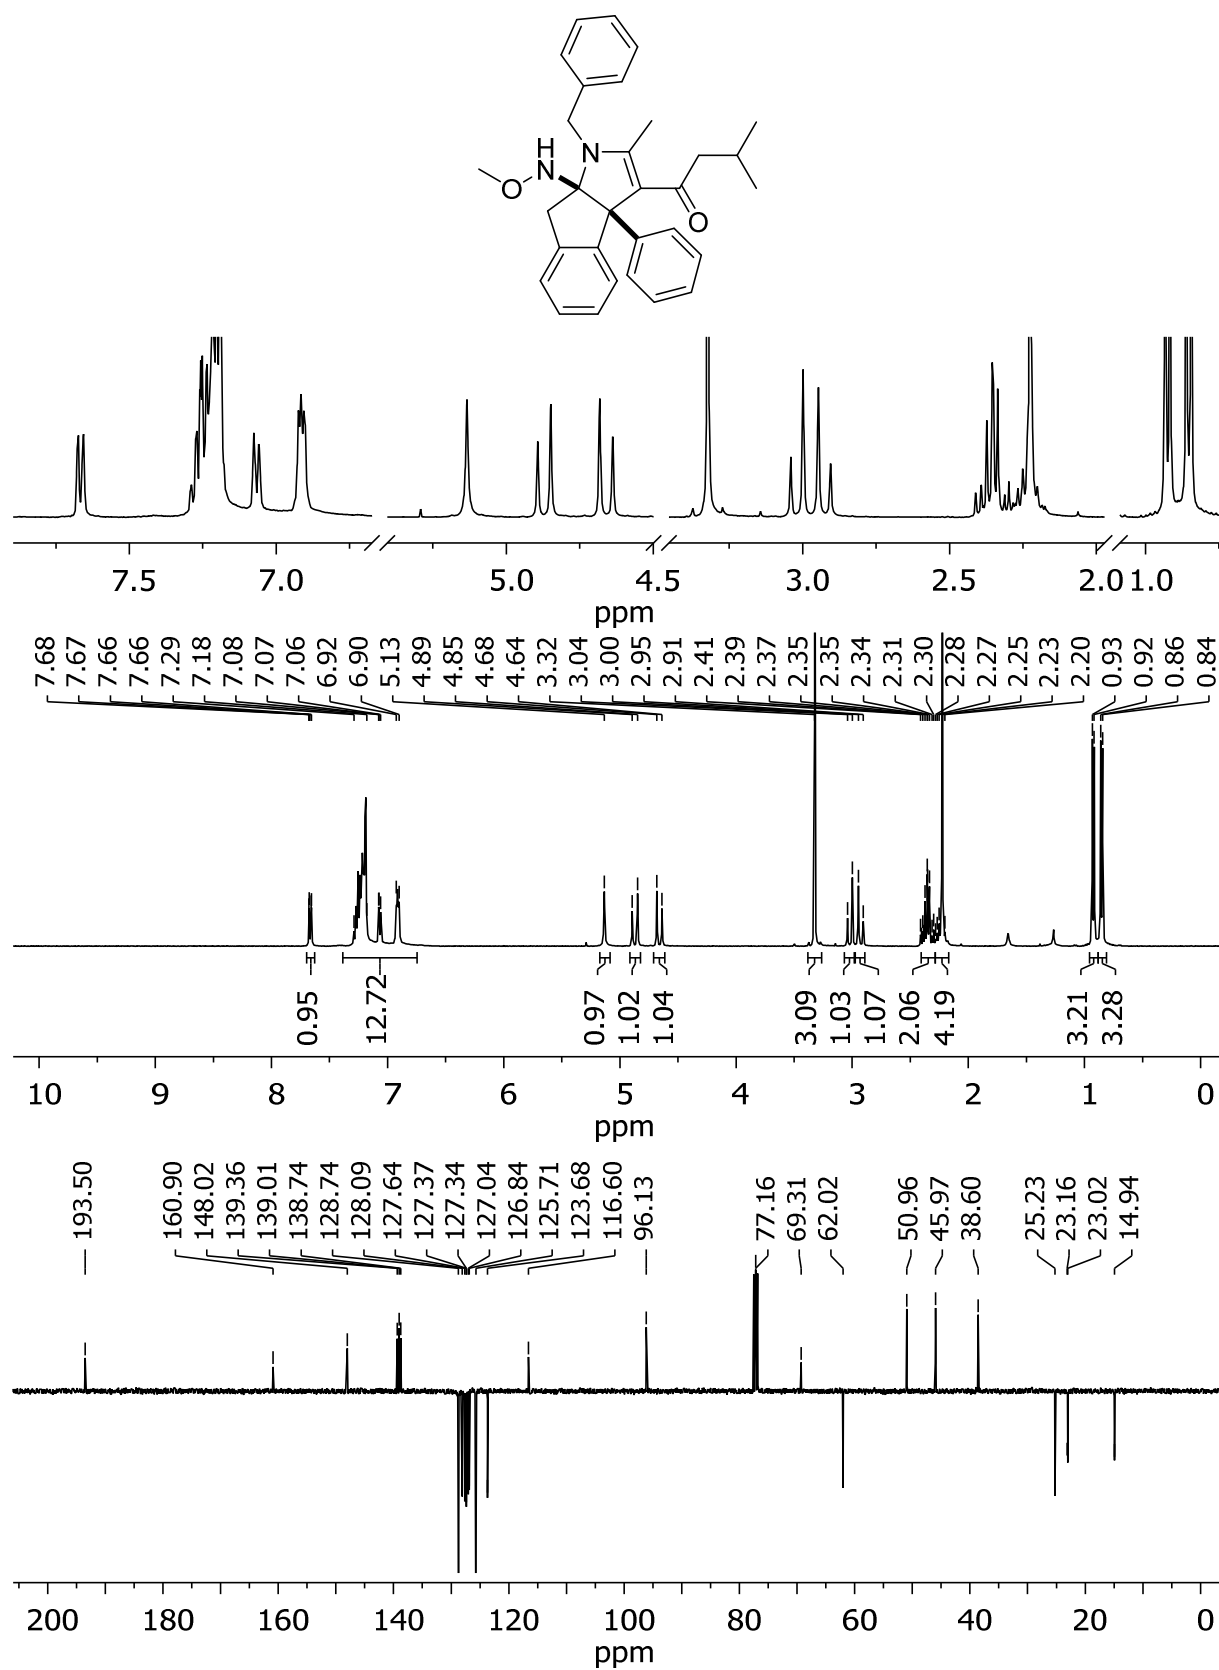

**Tetrahydroindeno[2,1-*b*]pyrrole 3z** (CDCl<sub>3</sub>, <sup>1</sup>H-NMR: 300 MHz, APT: 75 MHz)

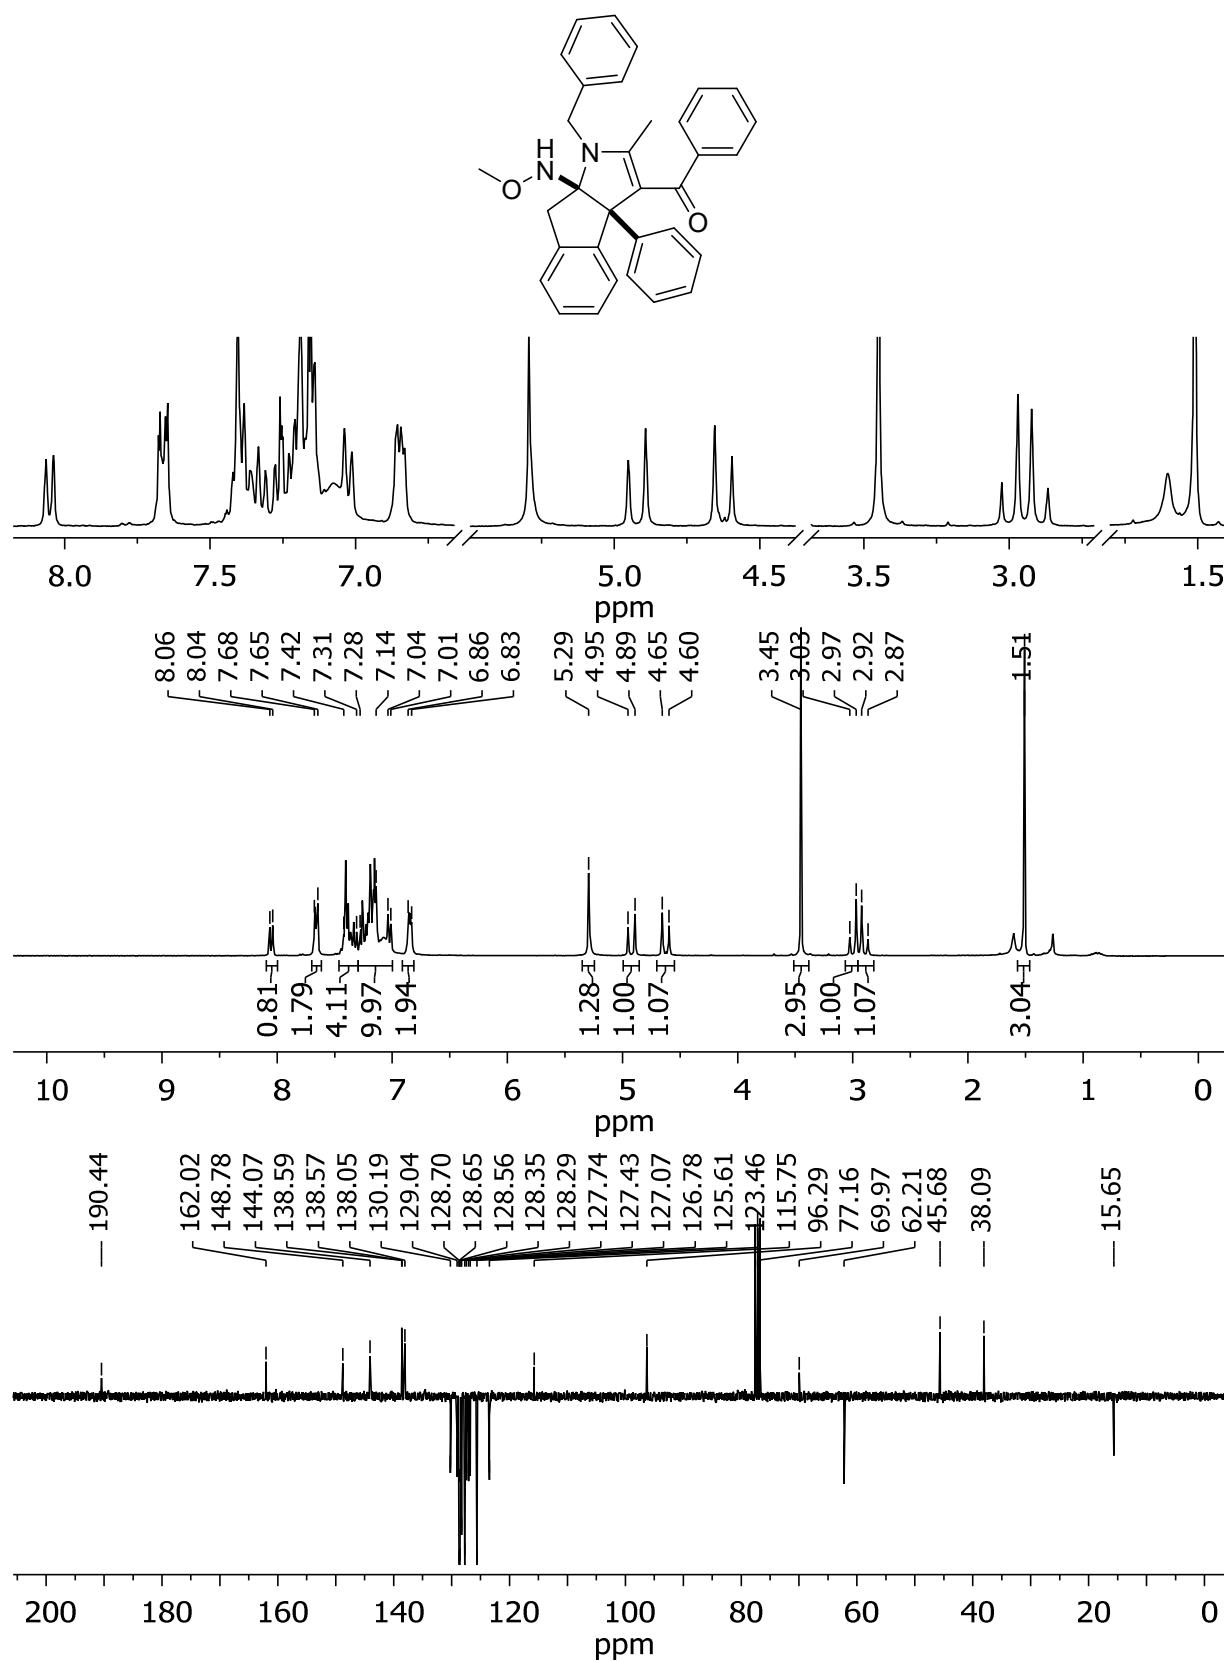

**Tetrahydroindeno[2,1-*b*]pyrrole 3aa** (CDCl<sub>3</sub>, <sup>1</sup>H-NMR: 400 MHz, APT: 100 MHz)

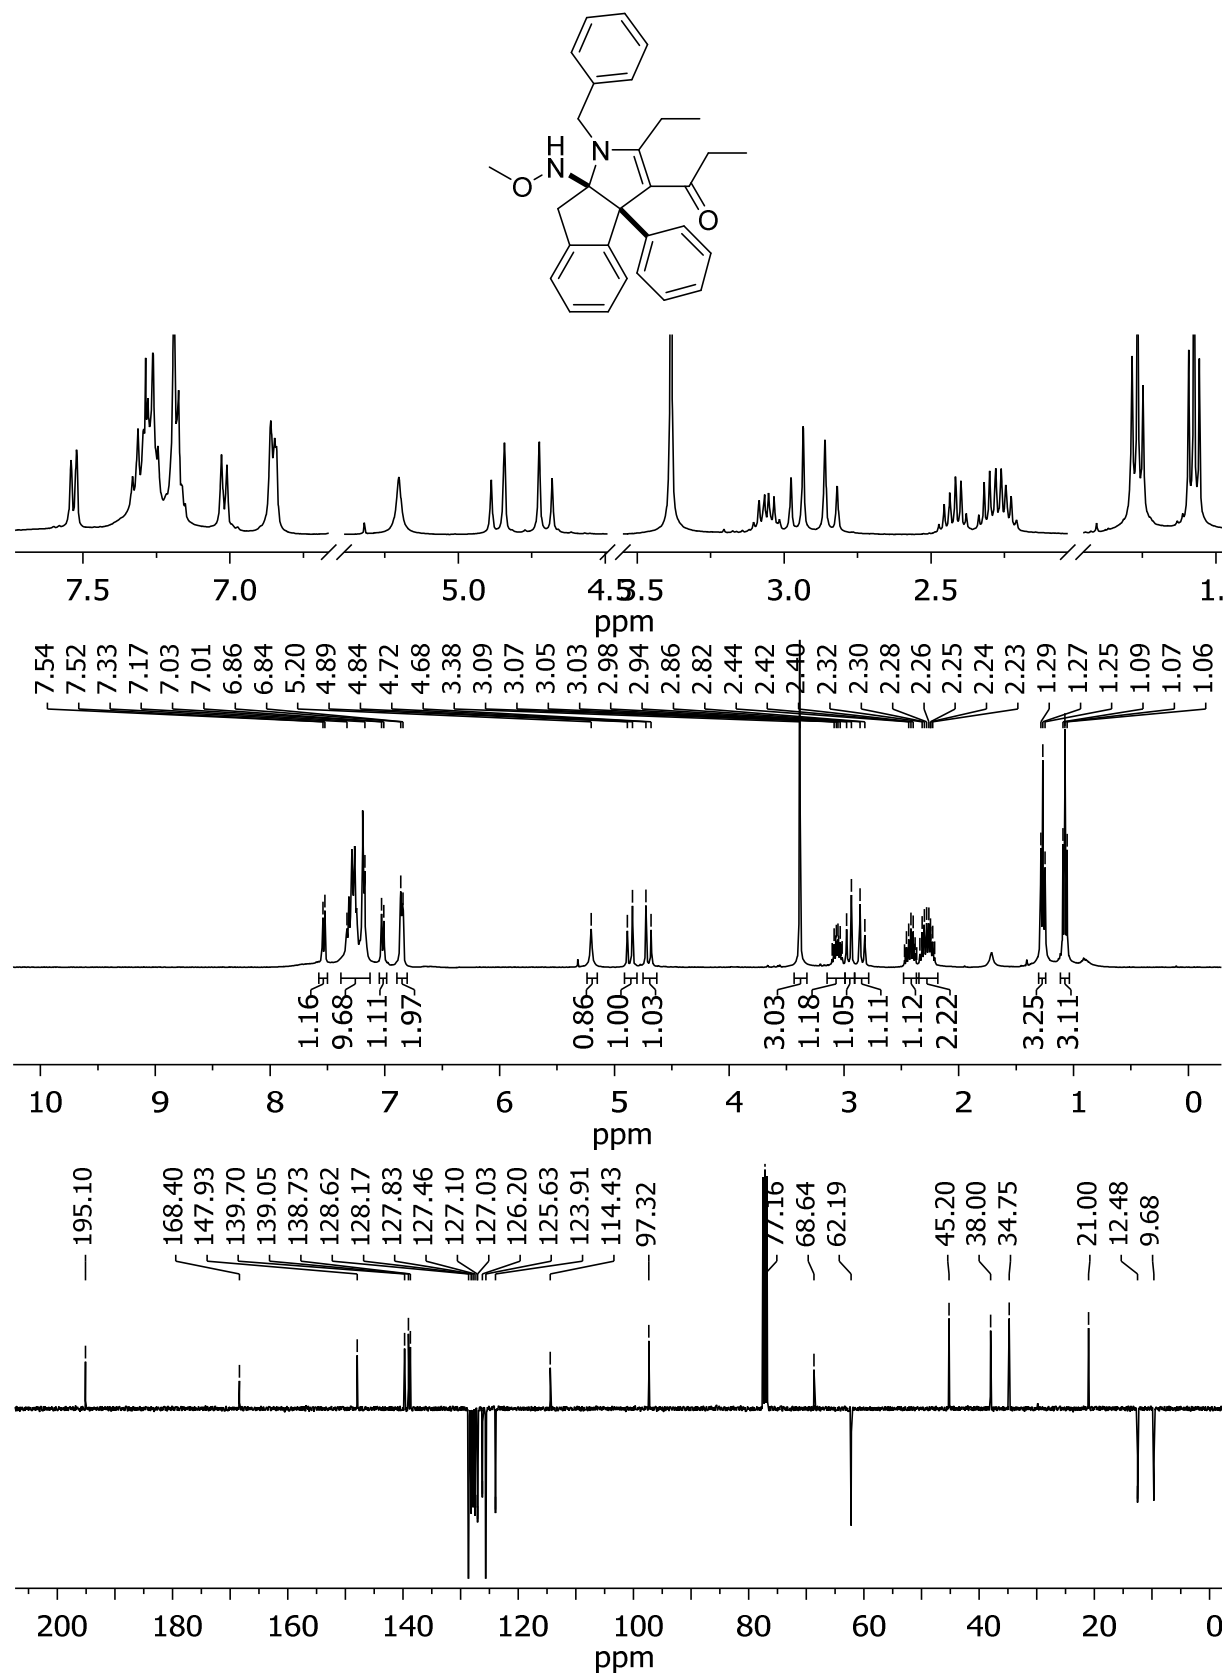



**Tetrahydroindeno[2,1-*b*]pyrrole 3ab** (CDCl<sub>3</sub>, <sup>1</sup>H-NMR: 400 MHz, APT: 100 MHz)

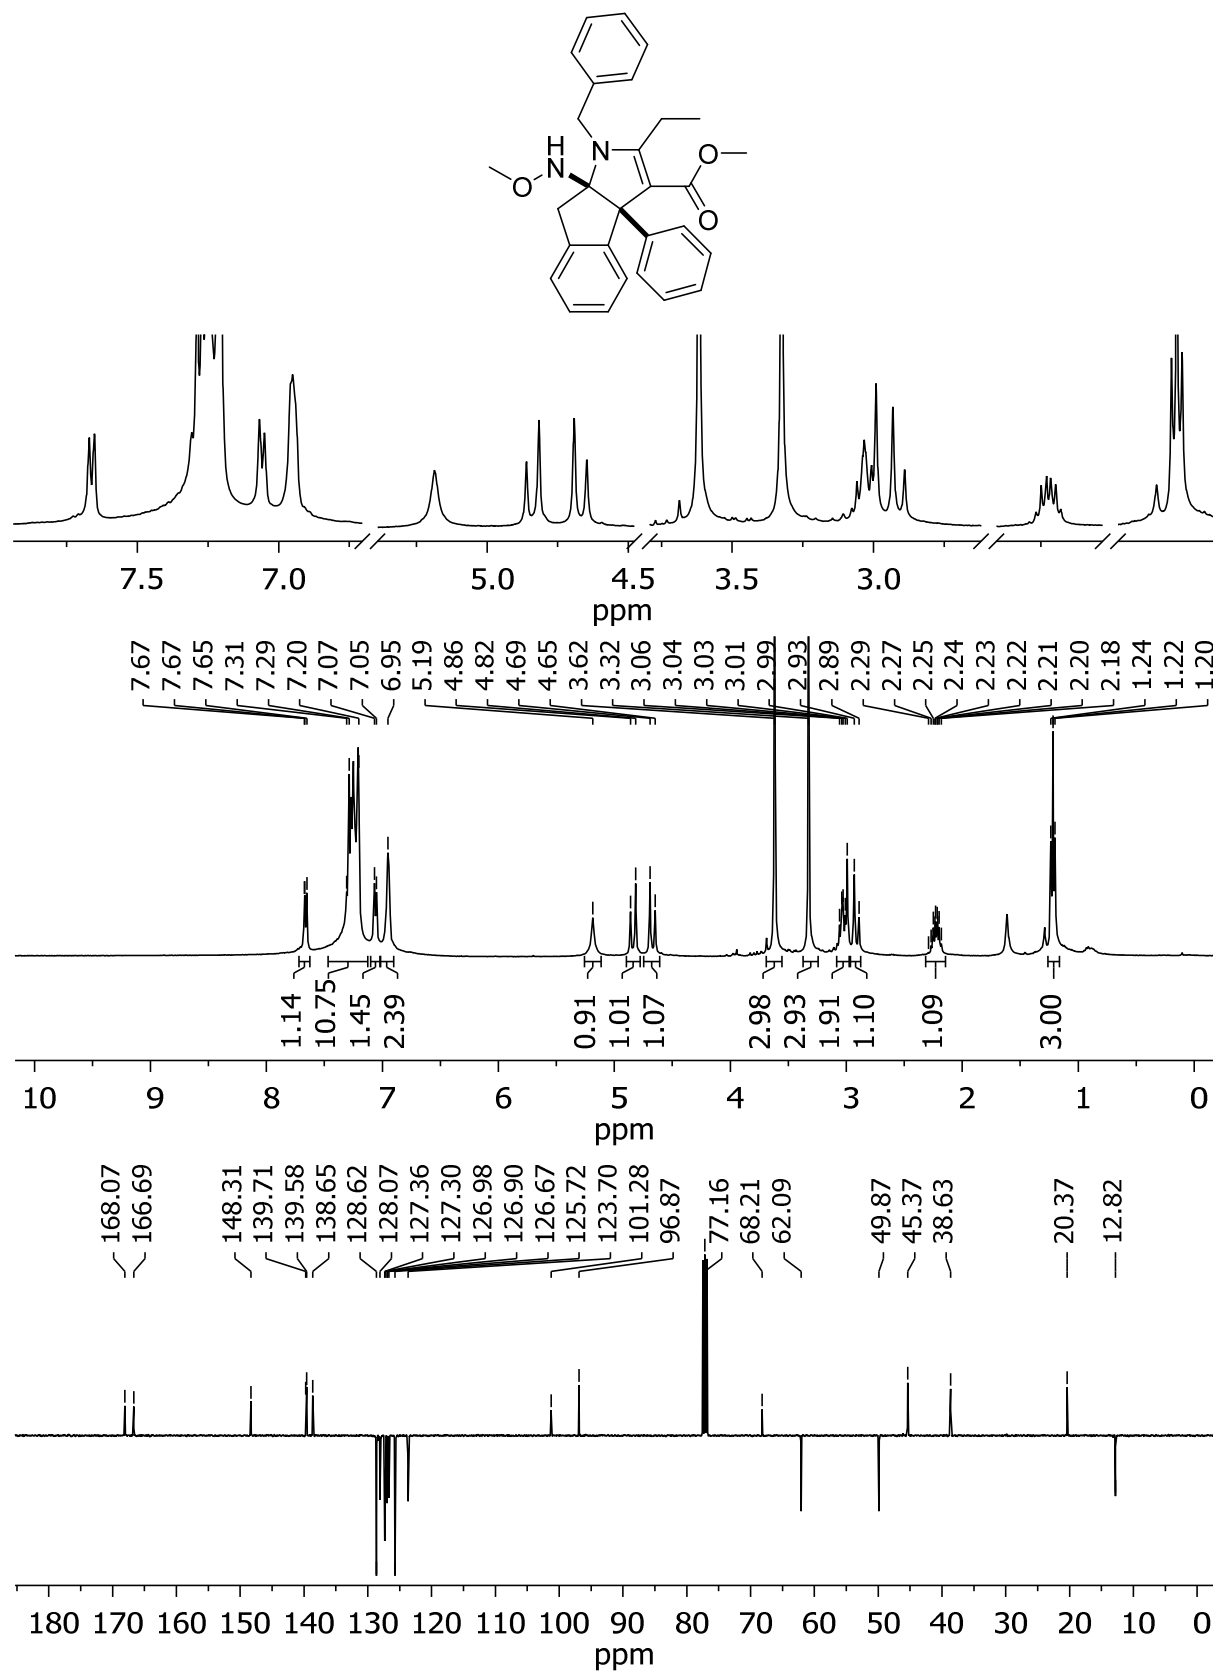

**Tetrahydroindeno[2,1-*b*]pyrrole 3ad** (CDCl<sub>3</sub>, <sup>1</sup>H-NMR: 300 MHz, APT: 100 MHz)

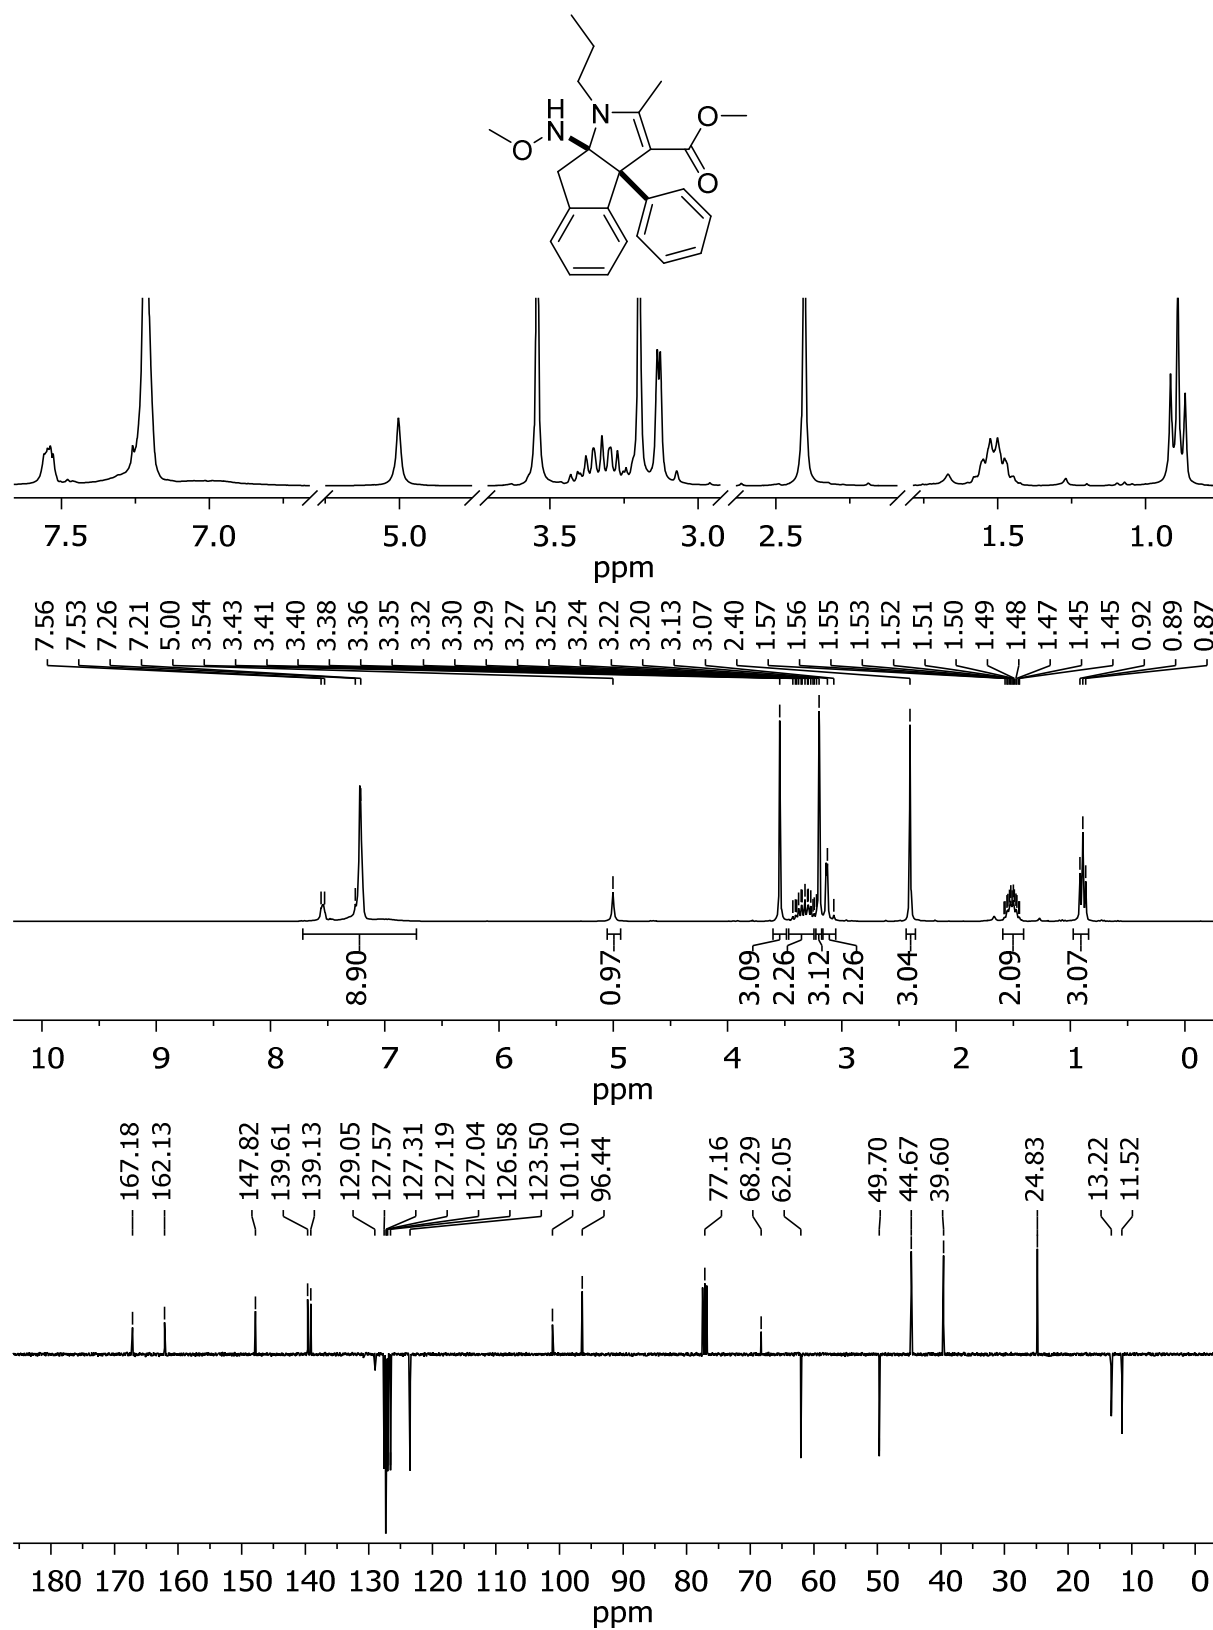

**Tetrahydroindeno[2,1-*b*]pyrrole 3ae** (CDCl<sub>3</sub>, <sup>1</sup>H-NMR: 300 MHz, APT: 100 MHz)

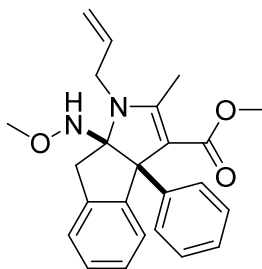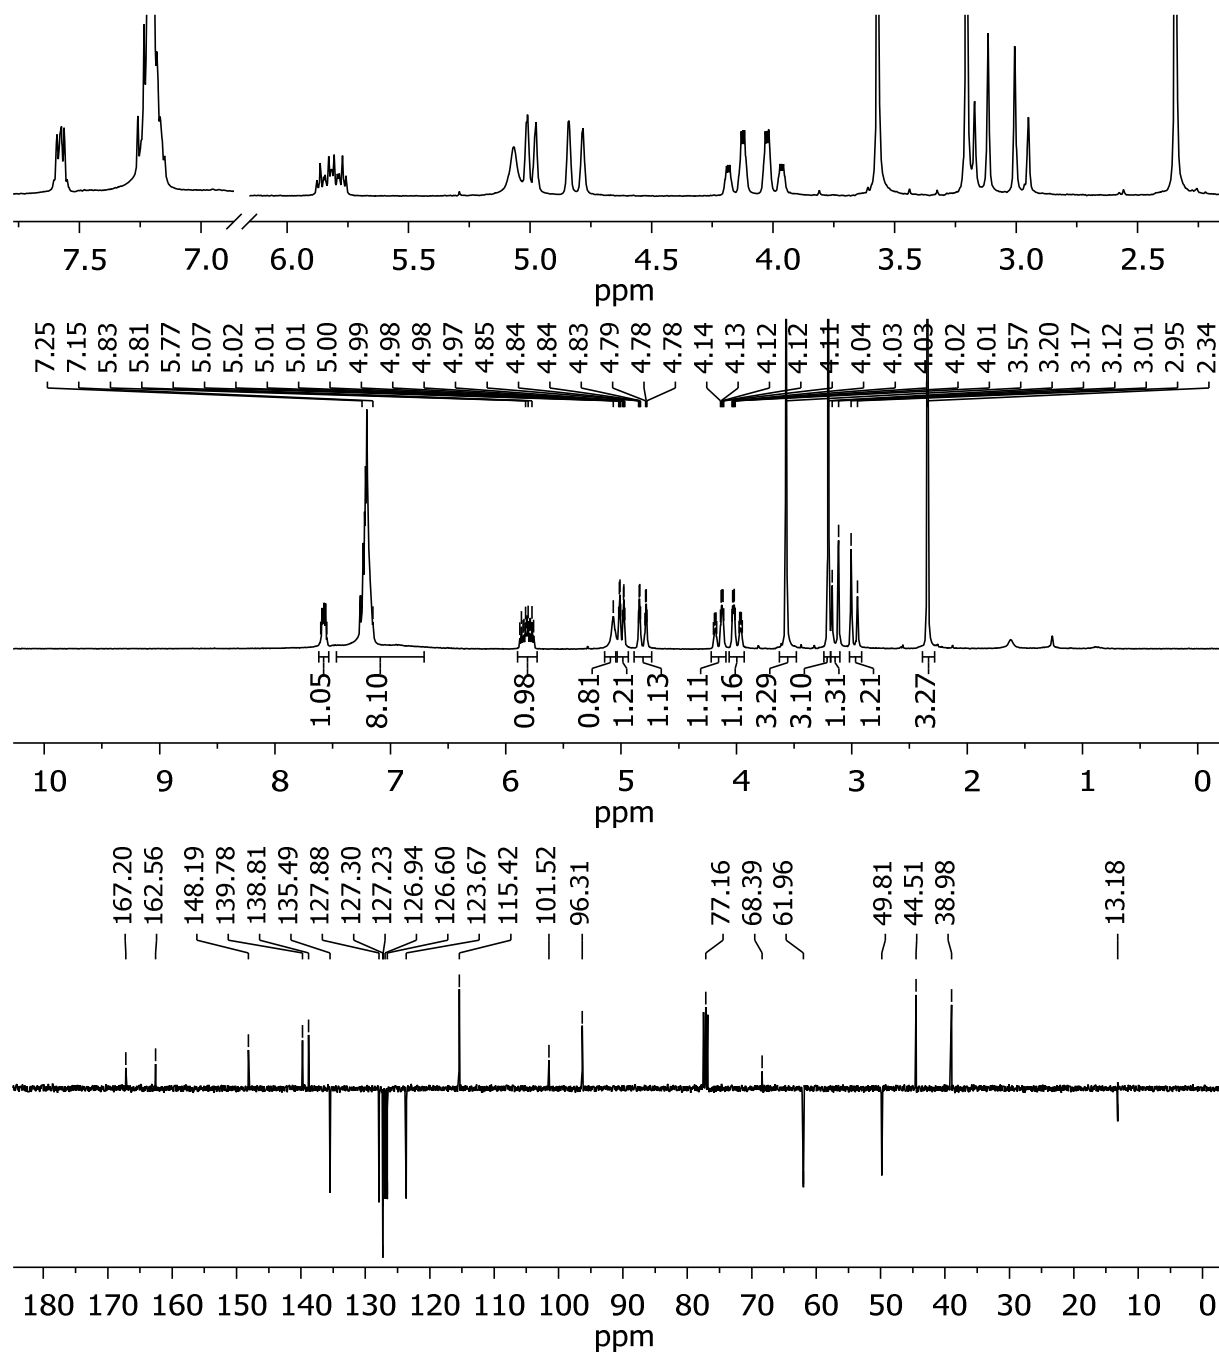

**Tetrahydroindeno[2,1-*b*]pyrrole 3af** (CDCl<sub>3</sub>, <sup>1</sup>H-NMR: 300 MHz, APT: 75 MHz)

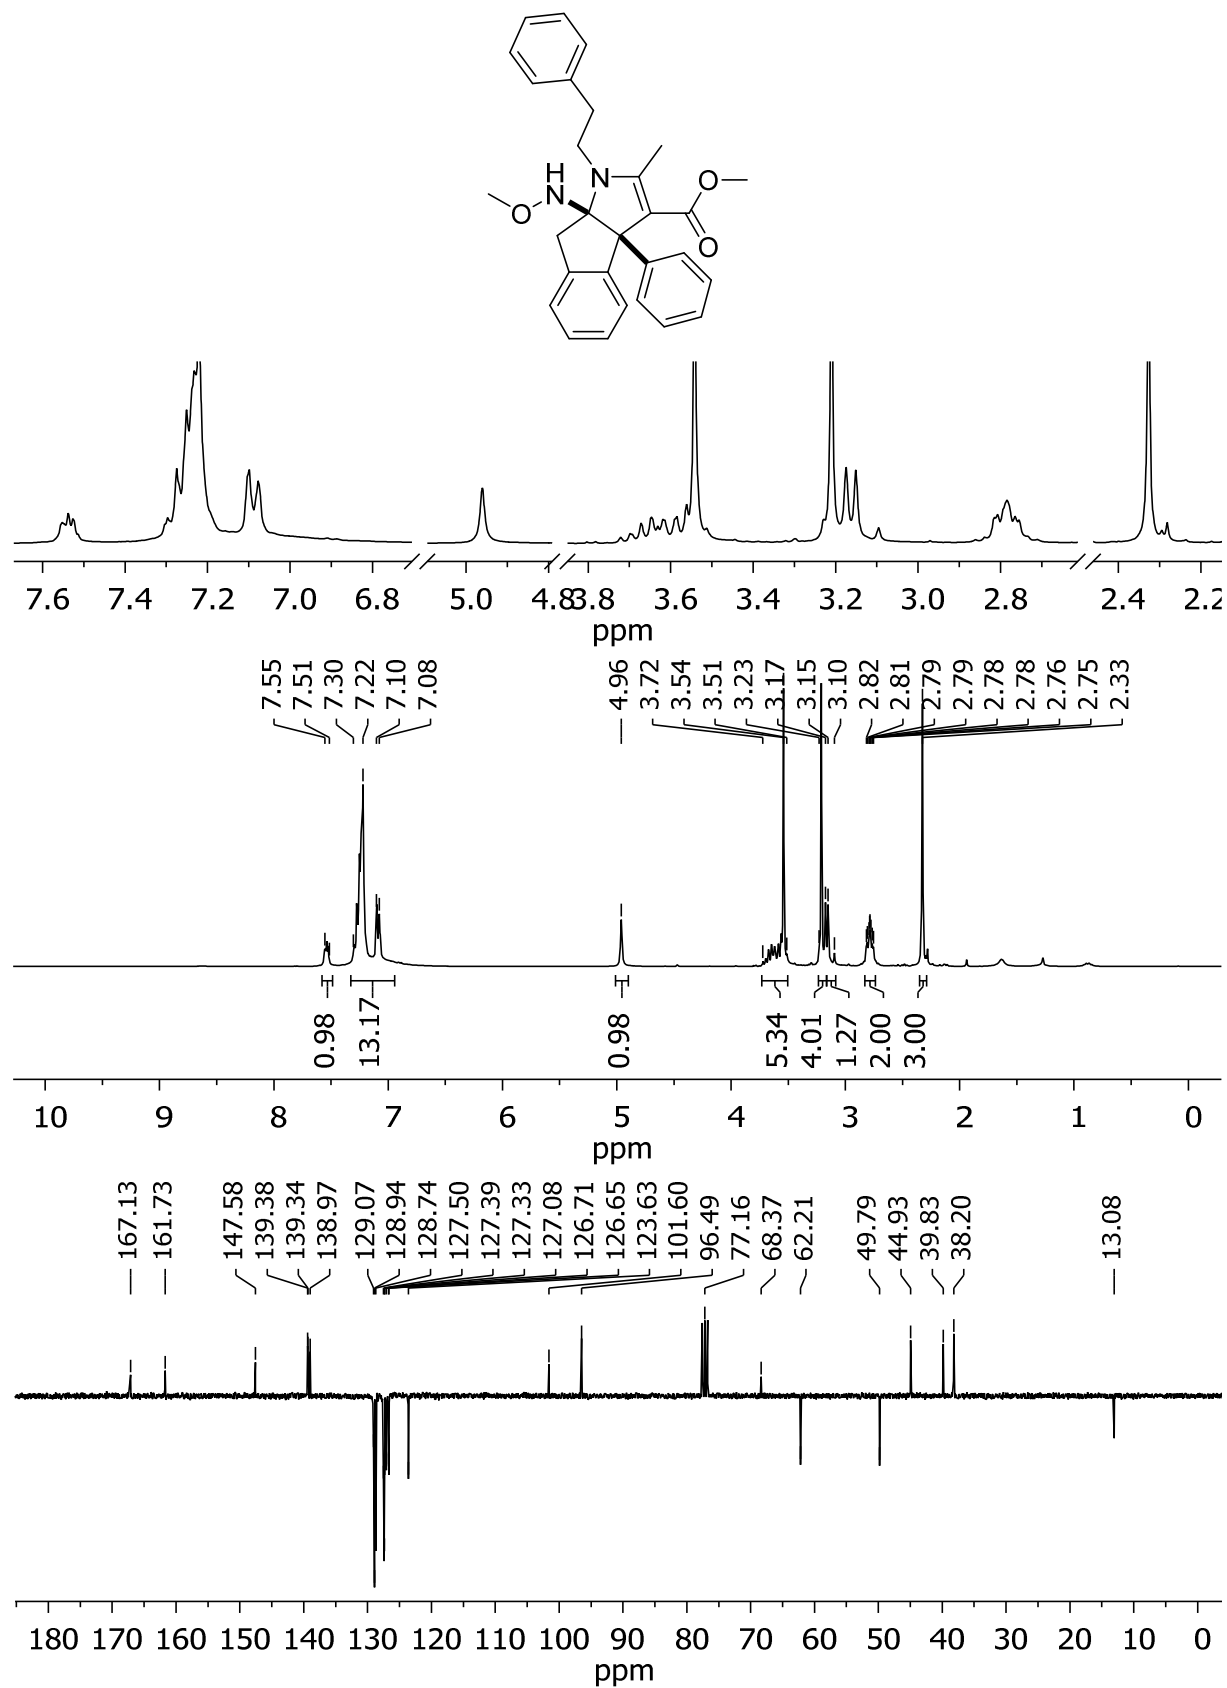

**Tetrahydroindeno[2,1-*b*]pyrrole 3ag** (CDCl<sub>3</sub>, <sup>1</sup>H-NMR: 300 MHz, APT: 75 MHz)

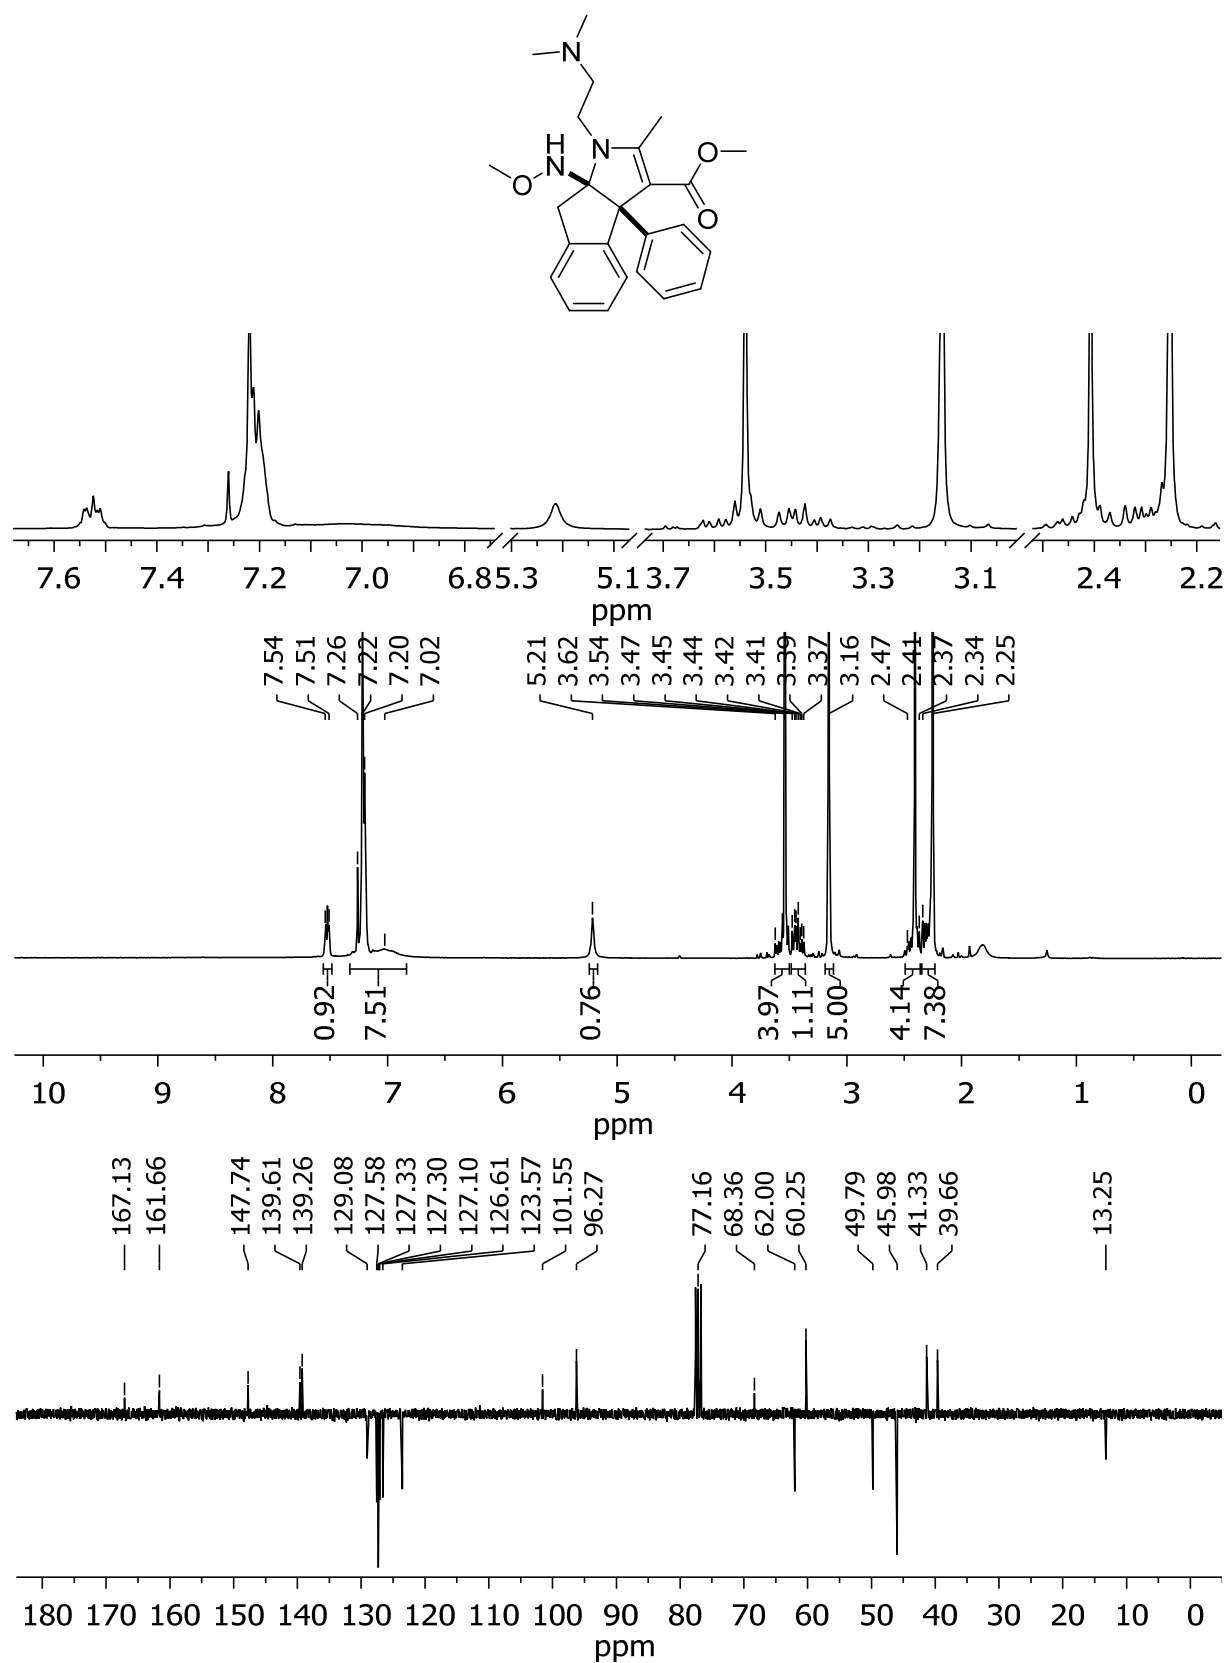

**Tetrahydroindeno[2,1-*b*]pyrrole 3ah** (CDCl<sub>3</sub>, <sup>1</sup>H-NMR: 400 MHz, APT: 100 MHz)

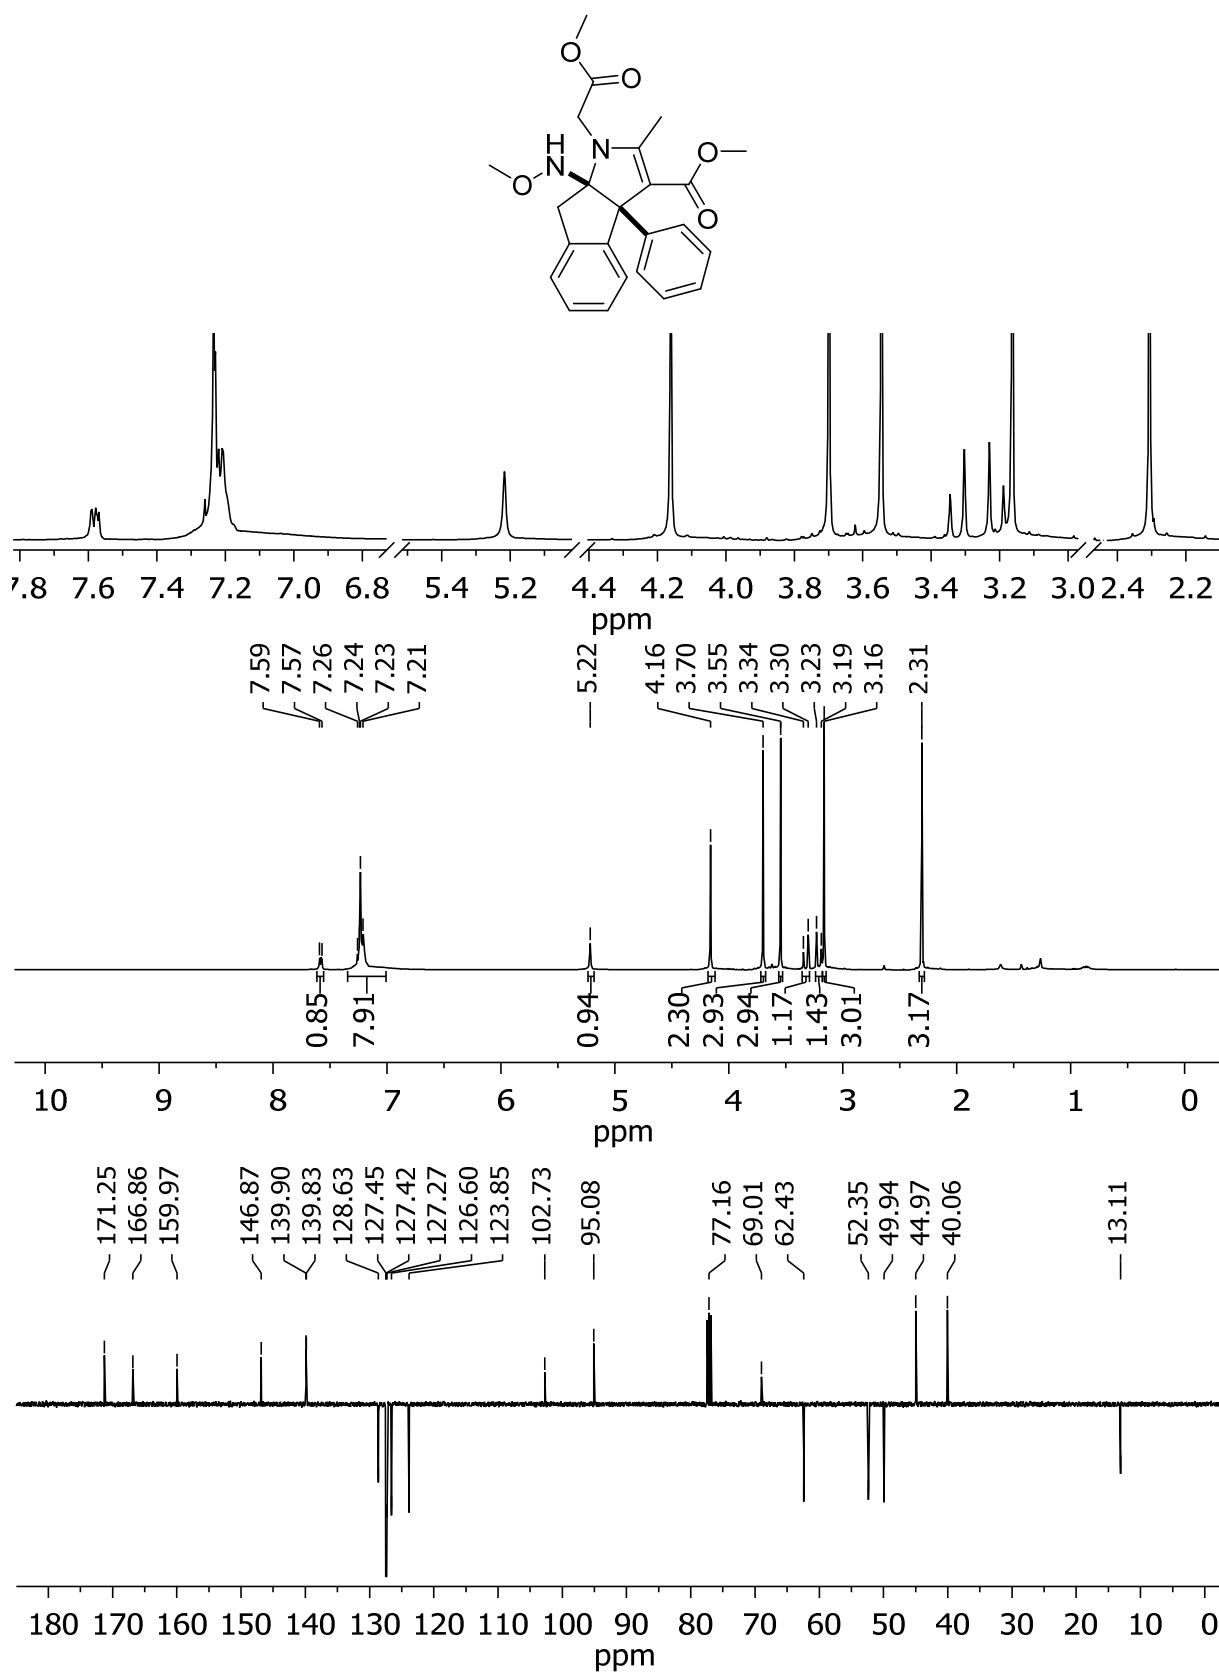

Chemical structure of compound 10 is shown above the spectra. The <sup>1</sup>H NMR spectrum (top) shows peaks at 7.56, 7.54, 7.26, 7.21, 7.20, 7.20, 7.19, 4.90, 3.51, 3.24, 3.08, 2.49, 1.93, 1.78, 1.72, 1.66, 1.38, and 1.08 ppm. The <sup>13</sup>C NMR spectrum (middle) shows peaks at 167.30, 161.65, 147.65, 140.07, 139.70, 129.01, 128.32, 127.38, 127.32, 127.27, 126.93, 126.49, 123.36, 101.18, 97.13, 77.16, 68.66, 68.45, 61.54, 55.65, 49.64, 40.70, 33.98, 32.75, 27.12, 27.05, 25.84, and 15.19 ppm.

### 3.3 X-Ray Crystal Structure of 3a

#### Crystal Data and Structure Refinement for Tetrahydroindeno[2,1-*b*]pyrrole 3a

|                                   |                                                               |          |
|-----------------------------------|---------------------------------------------------------------|----------|
| Identification code               | try1                                                          |          |
| Empirical formula                 | C <sub>28</sub> H <sub>28</sub> N <sub>2</sub> O <sub>3</sub> |          |
| Formula weight                    | 440.52                                                        |          |
| Temperature                       | 130 K                                                         |          |
| Wavelength                        | 0.71073 Å                                                     |          |
| Crystal system                    | Orthorhombic                                                  |          |
| Space group                       | Pbca                                                          |          |
| Unit cell dimensions              | a = 11.1041(2) Å                                              | α = 90°. |
|                                   | b = 17.9552(4) Å                                              | β = 90°. |
|                                   | c = 22.3185(5) Å                                              | γ = 90°. |
| Volume                            | 4449.78(16) Å <sup>3</sup>                                    |          |
| Z                                 | 8                                                             |          |
| Density (calculated)              | 1.315 Mg/m <sup>3</sup>                                       |          |
| Absorption coefficient            | 0.086 mm <sup>-1</sup>                                        |          |
| F(000)                            | 1872                                                          |          |
| Crystal size                      | 0.3000 x 0.3000 x 0.2000 mm <sup>3</sup>                      |          |
| Theta range for data collection   | 2.342 to 30.390°.                                             |          |
| Index ranges                      | -14 ≤ h ≤ 15, -24 ≤ k ≤ 24, -30 ≤ l ≤ 30                      |          |
| Reflections collected             | 43124                                                         |          |
| Independent reflections           | 6306 [R(int) = 0.0504]                                        |          |
| Completeness to theta = 30.390°   | 93.8 %                                                        |          |
| Absorption correction             | Semi-empirical from equivalents                               |          |
| Max. and min. transmission        | 1.00000 and 0.99762                                           |          |
| Refinement method                 | Full-matrix least-squares on F <sup>2</sup>                   |          |
| Data / restraints / parameters    | 6306 / 0 / 305                                                |          |
| Goodness-of-fit on F <sup>2</sup> | 1.017                                                         |          |
| Final R indices [I > 2σ(I)]       | R1 = 0.0481, wR2 = 0.0982                                     |          |
| R indices (all data)              | R1 = 0.0712, wR2 = 0.1072                                     |          |
| Largest diff. peak and hole       | 0.300 and -0.224 e.Å <sup>-3</sup>                            |          |



### Crystal Structure of Tetrahydroindeno[2,1-*b*]pyrrole **3a**

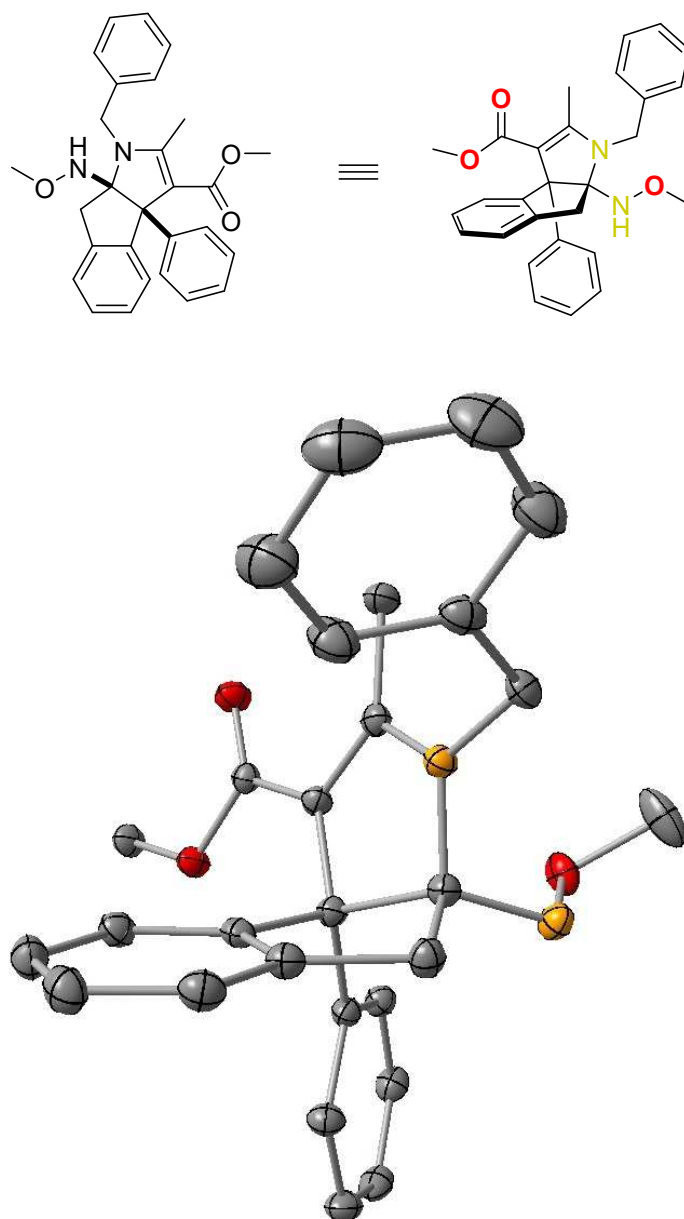

DIAMOND representation of tetrahydroindeno[2,1-*b*]pyrrole **3a** with thermal ellipsoids shown at 50% probability level. Hydrogen atoms are omitted for clarity. CCDC 1817406 contains the supplementary crystallographic data of **3a**. These data can be obtained free of charge from The Cambridge Crystallographic Data Centre via [www.ccdc.cam.ac.uk/data-request/cif](http://www.ccdc.cam.ac.uk/data-request/cif).

## 4 Derivatization of Tetrahydroindeno[2,1-*b*]pyrrole 3a

### 4.1 Procedures

#### Aza-Friedel-Crafts reaction of 3a with indole

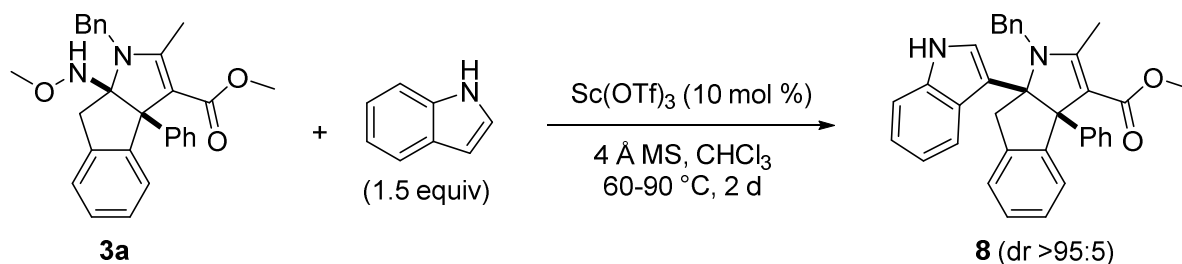

A mixture of amina **3a** (44 mg, 0.10 mmol, 1.0 equiv), indole (18 mg, 0.15 mmol, 1.5 equiv), Sc(OTf)<sub>3</sub> (4.9 mg, 10 μmol, 0.10 equiv) and 4 Å molecular sieve (25 mg) were dissolved in 0.5 mL abs. CHCl<sub>3</sub>. The reaction mixture was stirred at 60 °C for 24 h followed by 90 °C for another 24 h. It was quenched with sat. NaHCO<sub>3</sub>-solution and extracted twice with CH<sub>2</sub>Cl<sub>2</sub>. The combined organic phases were dried over Na<sub>2</sub>SO<sub>4</sub>, filtered and the solvent was removed under reduced pressure. The crude product was purified by flash column chromatography (15% → 50% MTBE/hexane). Compound **8** was obtained as a colorless solid (48 mg, 94%, dr >95:5). The NMR-spectrum of **8** shows two rotamers at room temperature in the ratio of 85:15. The spectroscopic data are displayed for the major rotamer.

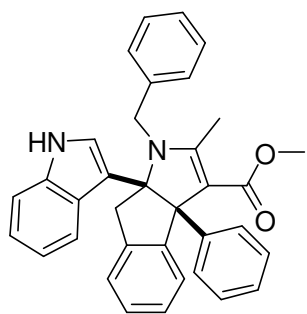

**R<sub>f</sub>**: 0.30 (40% MTBE/hexane); **mp.**: 134 – 136 °C; **<sup>1</sup>H-NMR** (400 MHz, DMSO-d<sub>6</sub>): δ (ppm) = 10.76 (bs, 1H), 7.56 (d, *J* = 7.0 Hz, 1H), 7.44 – 7.41 (m, 1H), 7.32 – 7.25 (m, 2H), 7.22 – 7.16 (m, 5H), 7.05 – 7.02 (m, 2H), 6.92 – 6.88 (m, 3H), 6.75 – 6.70 (m, 1H), 6.69 – 6.64 (m, 2H), 6.49 (m, 2H), 4.53 (d, *J* = 18.0 Hz, 1H), 4.10 (d, *J* = 18.0 Hz, 1H), 3.79 (d, *J* = 17.0 Hz, 1H), 3.47 (s, 3H), 3.15 (d, *J* = 17.0 Hz, 1H), 2.30 (s, 3H); **<sup>13</sup>C-NMR** (100 MHz, DMSO-d<sub>6</sub>): δ (ppm) = 166.2 (C=O), 161.9 (C<sub>q</sub>), 148.9 (C<sub>q</sub>), 142.6 (C<sub>q</sub>), 139.8 (C<sub>q</sub>), 139.2 (C<sub>q</sub>), 136.8 (C<sub>q</sub>), 128.3 (2x CH), 127.6 (2x CH), 126.9 (CH), 126.7 (CH), 126.1 (3x CH), 126.0 (CH), 125.6 (3x CH), 125.5 (C<sub>q</sub>), 125.0 (CH), 123.6 (CH), 120.7 (CH), 120.2 (CH), 119.1 (CH), 113.8 (C<sub>q</sub>), 111.5 (CH), 100.8 (C<sub>q</sub>), 84.6 (C<sub>q</sub>), 70.1 (C<sub>q</sub>), 49.4 (CH<sub>3</sub>), 46.4 (CH<sub>2</sub>), 41.2 (CH<sub>2</sub>), 13.5 (CH<sub>3</sub>); **IR** (KBr):  $\tilde{\nu}$  (cm<sup>-1</sup>) = 3419, 3059, 3028, 2943, 1649, 1560, 1494, 1474, 1457, 1415, 1340, 1329, 1202, 1188, 1162, 1127, 753, 736, 699; **HR-MS** (ESI<sup>+</sup>): calcd. for C<sub>35</sub>H<sub>30</sub>N<sub>2</sub>O<sub>2</sub>Na ([M+Na]<sup>+</sup>): 533.2200, found: 533.2203; **M**(C<sub>35</sub>H<sub>30</sub>N<sub>2</sub>O<sub>2</sub>): 510.64.

## Hydrolysis of 3a

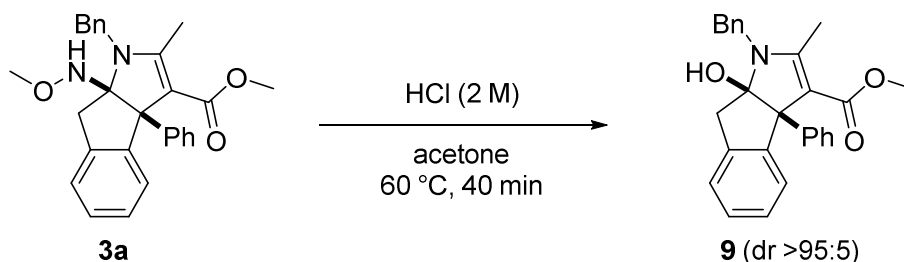

To a solution of **3a** (441 mg, 1.00 mmol, 1.00 equiv) in 10.0 mL acetone, 2.0 mL of a 2.0 M HCl-solution was added dropwise. The reaction mixture was stirred at 60 °C for 40 min and then cooled to room temperature. It was treated with sat.  $\text{NaHCO}_3$ -solution and EtOAc. The aqueous phase was separated and extracted twice with EtOAc. The combined organic phases were dried over  $\text{Na}_2\text{SO}_4$ , filtered and the solvent was removed under reduced pressure. The crude product was purified by flash column chromatography (30%  $\rightarrow$  50% MTBE/hexane). Compound **9** was obtained as a colorless solid (345 mg, 84%, dr >95:5).

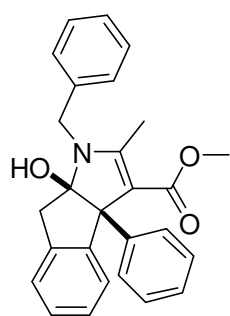

**R<sub>f</sub>**: 0.40 (50% MTBE/hexane); **mp.**: 52 – 54 °C; **<sup>1</sup>H-NMR** (400 MHz,  $\text{CDCl}_3$ ):  $\delta$  (ppm) = 7.68 – 7.66 (m, 1H), 7.37 – 7.25 (m, 8H), 7.19 – 7.06 (m, 5H), 4.68 (d,  $J$  = 17.5 Hz, 1H), 4.60 (d,  $J$  = 17.5 Hz, 1H), 3.60 (s, 3H), 3.32 (d,  $J$  = 16.5 Hz, 1H), 3.19 (d,  $J$  = 16.5 Hz, 1H), 2.29 (s, 3H), 1.97 (bs, 1H); **<sup>13</sup>C-NMR** (75 MHz,  $\text{CDCl}_3$ ):  $\delta$  (ppm) = 167.0 (C=O), 160.8 ( $\text{C}_q$ ), 146.0 ( $\text{C}_q$ ), 139.8 ( $\text{C}_q$ ), 139.5 ( $\text{C}_q$ ), 139.0 ( $\text{C}_q$ ), 128.9 (2x CH), 128.5 (2x CH), 128.2 (2x CH), 127.8 (CH), 127.6 (CH), 127.5 (CH), 127.3 (CH), 127.2 (CH), 126.0 (2x CH), 124.0 (CH), 103.7 ( $\text{C}_q$ ), 101.6 ( $\text{C}_q$ ), 68.6 ( $\text{C}_q$ ), 50.0 ( $\text{CH}_3$ ), 45.3 ( $\text{CH}_2$ ), 43.5 ( $\text{CH}_2$ ), 13.5 ( $\text{CH}_3$ ); **IR** (KBr):  $\tilde{\nu}$  ( $\text{cm}^{-1}$ ) = 3420, 3062, 3027, 2946, 2924, 1731, 1716, 1651, 1671, 1651, 1586, 1569, 1495, 1473, 1448, 1435, 1413, 1339, 1204, 1160, 1132, 1093, 1078, 1063, 754, 747, 733, 698; **HR-MS** (ESI<sup>+</sup>): calcd. for  $\text{C}_{27}\text{H}_{25}\text{NO}_3\text{Na}$  ( $[\text{M}+\text{Na}]^+$ ): 434.1727, found: 434.1730; **M**( $\text{C}_{27}\text{H}_{25}\text{NO}_3$ ): 411.50.

## Hosomi-Sakurai reaction of 9

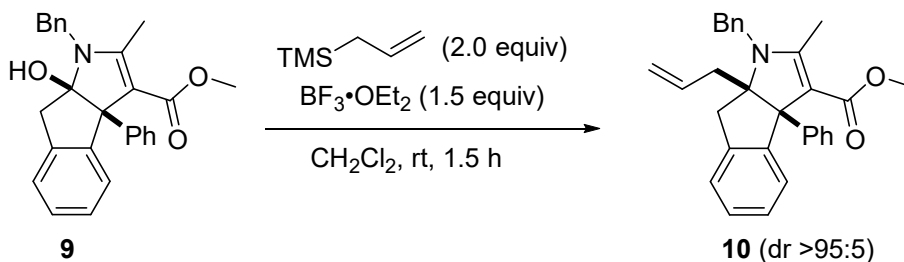

To a solution of **9** (41 mg, 0.10 mmol, 1.0 equiv) in 0.5 mL abs.  $\text{CH}_2\text{Cl}_2$ , allyltrimethylsilane (32  $\mu\text{L}$ , 0.20 mmol, 1.0 equiv) followed by  $\text{BF}_3\cdot\text{OEt}_2$  (19  $\mu\text{L}$ , 0.15 mmol, 1.5 equiv) were

added dropwise. The reaction mixture was stirred at room temperature for 1.5 h and quenched with water. The aqueous phase was separated and extracted twice with CH<sub>2</sub>Cl<sub>2</sub>. The combined organic phases were dried over Na<sub>2</sub>SO<sub>4</sub>, filtered and the solvent was removed under reduced pressure. The crude product was purified by flash column chromatography (10% → 20% MTBE/hexane). Compound **10** was obtained as a colorless solid (33 mg, 77%, dr >95:5).

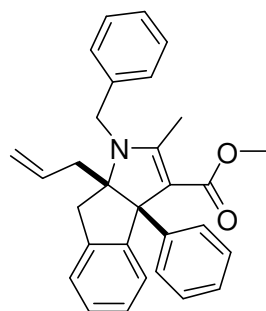

**R<sub>f</sub>**: 0.30 (15% MTBE/hexane); **mp.**: 130 – 132 °C; **<sup>1</sup>H-NMR** (300 MHz, CDCl<sub>3</sub>): δ (ppm) = 7.67 (d', *J* = 7.0 Hz, 1H), 7.49 – 7.14 (m, 9H), 7.05 (d', *J* = 7.0 Hz, 1H), 6.83 – 6.81 (m, 2H), 6.54 (m, 1H), 5.60 (ddt, *J* = 17.5, 10.5, 7.0 Hz, 1H), 4.95 – 4.88 (m, 2H), 4.57 (d, *J* = 18.0 Hz, 1H), 4.48 (d, *J* = 18.0 Hz, 1H), 3.60 (s, 3H), 3.03 (s, 2H), 2.18 (s, 3H), 1.97 (bs, 1H), 2.07 (dd, *J* = 15.0, 7.5 Hz, 1H), 1.94 (dd, *J* = 15.0, 6.5 Hz, 1H); **<sup>13</sup>C-NMR** (75 MHz, CDCl<sub>3</sub>): δ (ppm) = 167.7 (C=O), 162.6 (C<sub>q</sub>), 149.0 (C<sub>q</sub>), 141.6 (C<sub>q</sub>), 140.2 (C<sub>q</sub>), 138.9 (C<sub>q</sub>), 134.3 (CH), 128.6 (2x CH), 128.1 (CH), 127.7 (2x CH), 127.2 (CH), 127.0 (CH), 126.8 (CH), 126.5 (CH), 125.7 (2x CH), 123.6 (CH), 118.1 (CH<sub>2</sub>), 101.3 (C<sub>q</sub>), 83.3 (C<sub>q</sub>), 69.5 (C<sub>q</sub>), 49.8 (CH<sub>3</sub>), 46.8 (CH<sub>2</sub>), 41.1 (CH<sub>2</sub>), 40.6 (CH<sub>2</sub>), 13.4 (CH<sub>3</sub>);\* **IR** (KBr):  $\tilde{\nu}$  (cm<sup>-1</sup>) = 3433, 3063, 2942, 2902, 1662, 1585, 1562, 1413, 1328, 1198, 1162, 1124, 755, 743, 733, 701; **HR-MS** (ESI<sup>+</sup>): calcd. for C<sub>30</sub>H<sub>30</sub>NO<sub>2</sub> ([M+H]<sup>+</sup>): 436.2271, found: 436.2271; **M**(C<sub>30</sub>H<sub>29</sub>NO<sub>2</sub>): 435.57.

### Mukaiyama-Mannich reaction of **9**

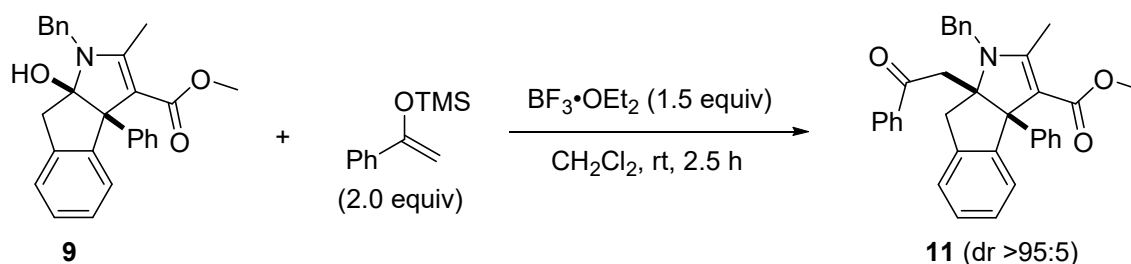

To a solution of **9** (41 mg, 0.10 mmol, 1.0 equiv) in 1.0 mL abs. CH<sub>2</sub>Cl<sub>2</sub>, 1-phenyl-1-trimethylsiloxyethylene (41  $\mu$ L, 0.20 mmol, 1.0 equiv) followed by BF<sub>3</sub>·OEt<sub>2</sub> (19  $\mu$ L, 0.15 mmol, 1.5 equiv) were added dropwise. The reaction mixture was stirred at room temperature for 2.5 h and quenched with water. The aqueous phase was separated and extracted twice with CH<sub>2</sub>Cl<sub>2</sub>. The combined organic phases were dried over Na<sub>2</sub>SO<sub>4</sub>, filtered and the solvent was removed under reduced pressure. The crude product was purified by flash column chromatography (10% → 50% MTBE/hexane). Compound **11** was obtained as a colorless solid (41 mg, 79%, dr >95:5).

\* One <sup>13</sup>C-signal is very broad and could not be clearly detected.

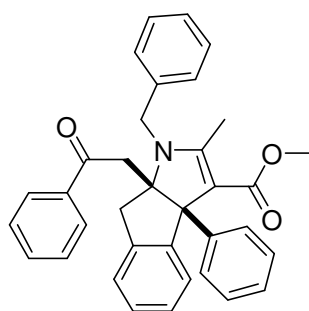

**R<sub>f</sub>**: 0.27 (20% MTBE/hexane); **mp.**: 129 – 131 °C; **<sup>1</sup>H-NMR** (300 MHz, CDCl<sub>3</sub>): δ (ppm) = 7.70 – 7.68 (m, 1H), 7.59 – 7.57 (m, 2H), 7.53 – 7.49 (m, 2H), 7.38 – 7.34 (m, 2H), 7.31 – 7.19 (m, 3H), 7.15 – 7.12 (m, 2H), 7.09 – 7.04 (m, 4H), 6.72 – 6.70 (m, 2H), 6.50 – 6.47 (m, 1H), 4.54 (d, *J* = 18.0 Hz, 1H), 4.45 (d, *J* = 18.0 Hz, 1H), 3.62 (s, 3H), 3.44 (d, *J* = 17.0 Hz, 1H), 3.30 (d, *J* = 17.0 Hz, 1H), 3.28 (d, *J* = 16.5 Hz, 1H), 2.22 (s, 3H), 2.20 (d, *J* = 16.5 Hz, 1H);

**<sup>13</sup>C-NMR** (100 MHz, CDCl<sub>3</sub>): δ (ppm) = 198.9 (C=O), 167.7 (C=O), 162.5 (C<sub>q</sub>), 147.7 (C<sub>q</sub>), 141.7 (C<sub>q</sub>), 140.8 (C<sub>q</sub>), 138.8 (C<sub>q</sub>), 137.7 (C<sub>q</sub>), 133.2 (CH), 128.9 (2x CH), 128.6 (2x CH), 128.5 (2x CH), 128.1 (CH), 128.0 (2x CH), 127.7 (2x CH), 127.4 (CH), 126.8 (CH), 127.7 (CH), 126.5 (CH), 125.7 (2x CH), 123.8 (CH), 101.6 (C<sub>q</sub>), 81.8 (C<sub>q</sub>), 71.1 (C<sub>q</sub>), 49.9 (CH<sub>3</sub>), 47.1 (CH<sub>2</sub>), 43.9 (CH<sub>2</sub>), 40.9 (CH<sub>2</sub>), 13.7 (CH<sub>3</sub>); **IR** (KBr):  $\tilde{\nu}$  (cm<sup>-1</sup>) = 3444, 3061, 3025, 2941, 2924, 1669, 1586, 1567, 1448, 1415, 1361, 1340, 1199, 1158, 1124, 754, 744, 730, 700; **HR-MS** (ESI<sup>+</sup>): calcd. for C<sub>35</sub>H<sub>31</sub>NO<sub>3</sub>Na ([M+Na]<sup>+</sup>): 536.2196, found: 536.2191; **M(C<sub>35</sub>H<sub>31</sub>NO<sub>3</sub>)**: 513.64.

## Reduction of 9

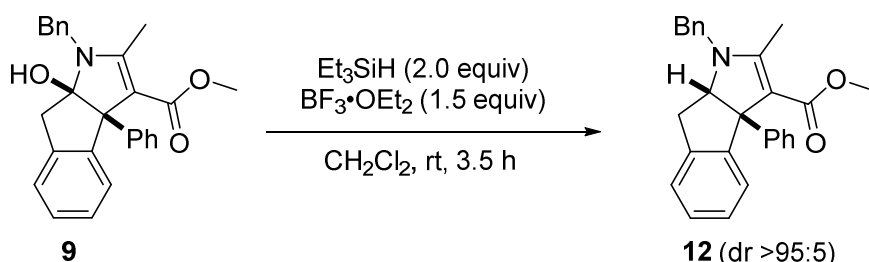

To a solution of **9** (41 mg, 0.10 mmol, 1.0 equiv) in 0.5 mL abs. CH<sub>2</sub>Cl<sub>2</sub>, triethylsilane (32 μL, 0.20 mmol, 1.0 equiv) followed by BF<sub>3</sub>·OEt<sub>2</sub> (19 μL, 0.15 mmol, 1.5 equiv) were added dropwise. The reaction mixture was stirred at room temperature for 3.5 h and quenched with water. The aqueous phase was separated and extracted twice with CH<sub>2</sub>Cl<sub>2</sub>. The combined organic phases were dried over Na<sub>2</sub>SO<sub>4</sub>, filtered and the solvent was removed under reduced pressure. The crude product was purified by flash column chromatography (10% → 20% MTBE/hexane). Compound **12** was obtained as a colorless solid (21 mg, 52%, dr >95:5).

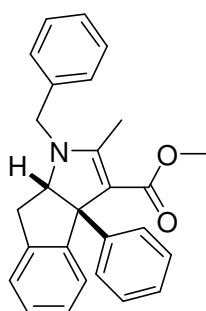

**R<sub>f</sub>**: 0.31 (20% MTBE/hexane); **mp.**: 47 – 49 °C; **<sup>1</sup>H-NMR** (400 MHz, CDCl<sub>3</sub>): δ (ppm) = 7.72 – 7.70 (m, 1H), 7.33 – 7.26 (m, 6H), 7.23 – 7.19 (m, 2H), 7.16 – 7.12 (m, 3H), 7.06 (d', *J* = 7.5 Hz, 2H), 4.57 (d, *J* = 16.5 Hz, 1H), 4.34 (d, *J* = 16.5 Hz, 1H), 4.13 (d, *J* = 6.0 Hz, 1H), 3.56 (s, 3H), 3.12 (dd, *J* = 16.5, 6.0 Hz, 1H), 3.03 (d, *J* = 16.5 Hz, 1H), 2.39 (s, 3H); **<sup>13</sup>C-NMR** (100 MHz, CDCl<sub>3</sub>): δ (ppm) = 167.4 (C=O), 161.8 (C<sub>q</sub>), 147.0 (C<sub>q</sub>), 146.7

(C<sub>q</sub>), 141.4 (C<sub>q</sub>), 137.1 (C<sub>q</sub>), 129.0 (2x CH), 128.0 (2x CH), 127.61 (CH), 127.56 (CH), 127.44 (CH), 127.36 (CH), 127.0 (2x CH), 126.8 (2x CH), 125.9 (CH), 124.5 (CH), 103.1 (C<sub>q</sub>), 77.5 (CH), 66.7 (C<sub>q</sub>), 49.9 (CH<sub>3</sub>), 48.0 (CH<sub>2</sub>), 36.2 (CH<sub>2</sub>), 13.4 (CH<sub>3</sub>); **IR** (KBr):  $\tilde{\nu}$  (cm<sup>-1</sup>) = 3444, 3025, 2942, 2922, 1668, 1566, 1560, 1420, 1202, 1157, 1127, 756, 732, 699; **HR-MS** (ESI<sup>+</sup>): calcd. for C<sub>27</sub>H<sub>25</sub>NO<sub>2</sub>Na ([M+Na]<sup>+</sup>): 418.1778, found: 418.1776; **M**(C<sub>27</sub>H<sub>25</sub>NO<sub>2</sub>): 395.50.

### Aza-Friedel-Crafts reaction of **9** with 2-methylfuran

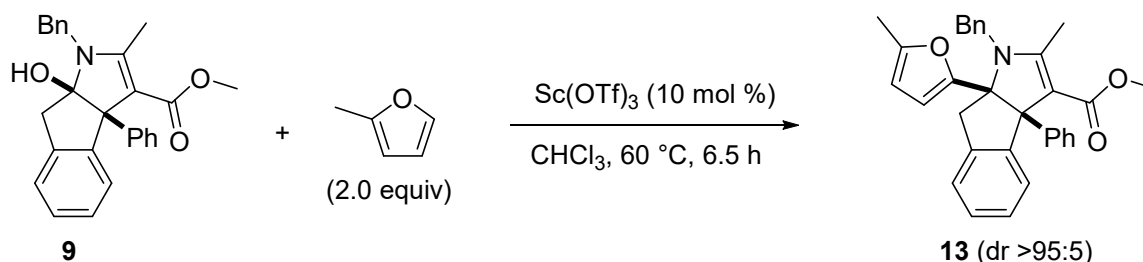

Compound **9** (41 mg, 0.10 mmol, 1.0 equiv), 2-methylfuran (18  $\mu$ L, 0.20 mmol, 2.0 equiv) and Sc(OTf)<sub>3</sub> (4.9 mg, 10  $\mu$ mol, 0.10 equiv) were placed in an oven dried and sealable DURAN® test tube. Abs. CHCl<sub>3</sub> (1.0 mL) was added and the reaction mixture was stirred at 60 °C for 6.5 h. It was quenched with sat. NaHCO<sub>3</sub>-solution and extracted twice with CH<sub>2</sub>Cl<sub>2</sub>. The combined organic phases were dried over Na<sub>2</sub>SO<sub>4</sub>, filtered and the solvent was removed under reduced pressure. The crude product was purified by flash column chromatography (10% → 20% MTBE/hexane). Compound **13** was obtained as a colorless solid (40 mg, 84%, dr >95:5).

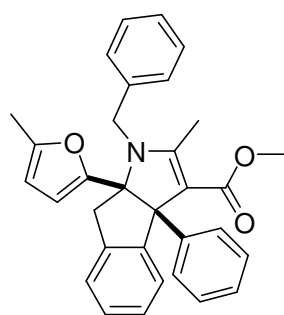

**R<sub>f</sub>**: 0.37 (20% MTBE/hexane); **mp.**: 182 – 184 °C; **<sup>1</sup>H-NMR** (300 MHz, CDCl<sub>3</sub>):  $\delta$  (ppm) = 7.68 – 7.65 (m, 1H), 7.34 – 7.26 (m, 2H), 7.19 – 7.15 (m, 4H), 7.00 – 6.92 (m, 5H), 6.74 (m, 2H), 5.79 (d,  $J$  = 3.0 Hz, 1H), 5.63 (m, 1H), 4.62 (d,  $J$  = 17.5 Hz, 1H), 4.22 (d,  $J$  = 17.5 Hz, 1H), 3.60 – 3.55 (m, 4H), 3.09 (d,  $J$  = 16.5 Hz, 1H), 2.32 (s, 3H), 1.95 (s, 3H); **<sup>13</sup>C-NMR** (100 MHz, CDCl<sub>3</sub>):  $\delta$  (ppm) = 167.6 (C=O), 162.9 (C<sub>q</sub>), 152.4 (C<sub>q</sub>), 150.1 (C<sub>q</sub>), 147.2 (C<sub>q</sub>), 142.2 (C<sub>q</sub>), 140.1 (C<sub>q</sub>), 139.0 (C<sub>q</sub>), 128.6 (2x CH), 128.0 (CH), 127.8 (2x CH), 127.3 (CH), 127.12 (CH), 127.08 (CH), 126.8 (2x CH), 125.9 (2x CH), 125.7 (CH), 123.8 (CH), 110.1 (CH), 105.9 (CH), 101.4 (C<sub>q</sub>), 84.4 (C<sub>q</sub>), 71.3 (C<sub>q</sub>), 49.9 (CH<sub>3</sub>), 47.6 (CH<sub>2</sub>), 39.6 (CH<sub>2</sub>), 13.6 (CH<sub>3</sub>), 13.4 (CH<sub>3</sub>); **IR** (KBr):  $\tilde{\nu}$  (cm<sup>-1</sup>) = 3445, 3061, 3028, 2944, 2918, 1670, 1587, 1572, 1449, 1411, 1339, 1326, 1296, 1203, 1188, 1160, 1132, 1025, 754, 736, 698; **HR-MS** (ESI<sup>+</sup>): calcd. for C<sub>32</sub>H<sub>29</sub>NO<sub>3</sub>Na ([M+Na]<sup>+</sup>): 498.2040, found: 498.2045; **M**(C<sub>32</sub>H<sub>29</sub>NO<sub>3</sub>): 475.59.

## 4.2 $^1\text{H}$ -NMR and $^{13}\text{C}$ -NMR Spectra

### 8a-(Indolyl)tetrahydroindeno[2,1-b]pyrrole 8

(DMSO- $d_6$ ,  $^1\text{H}$ -NMR: 400 MHz, APT: 100 MHz)

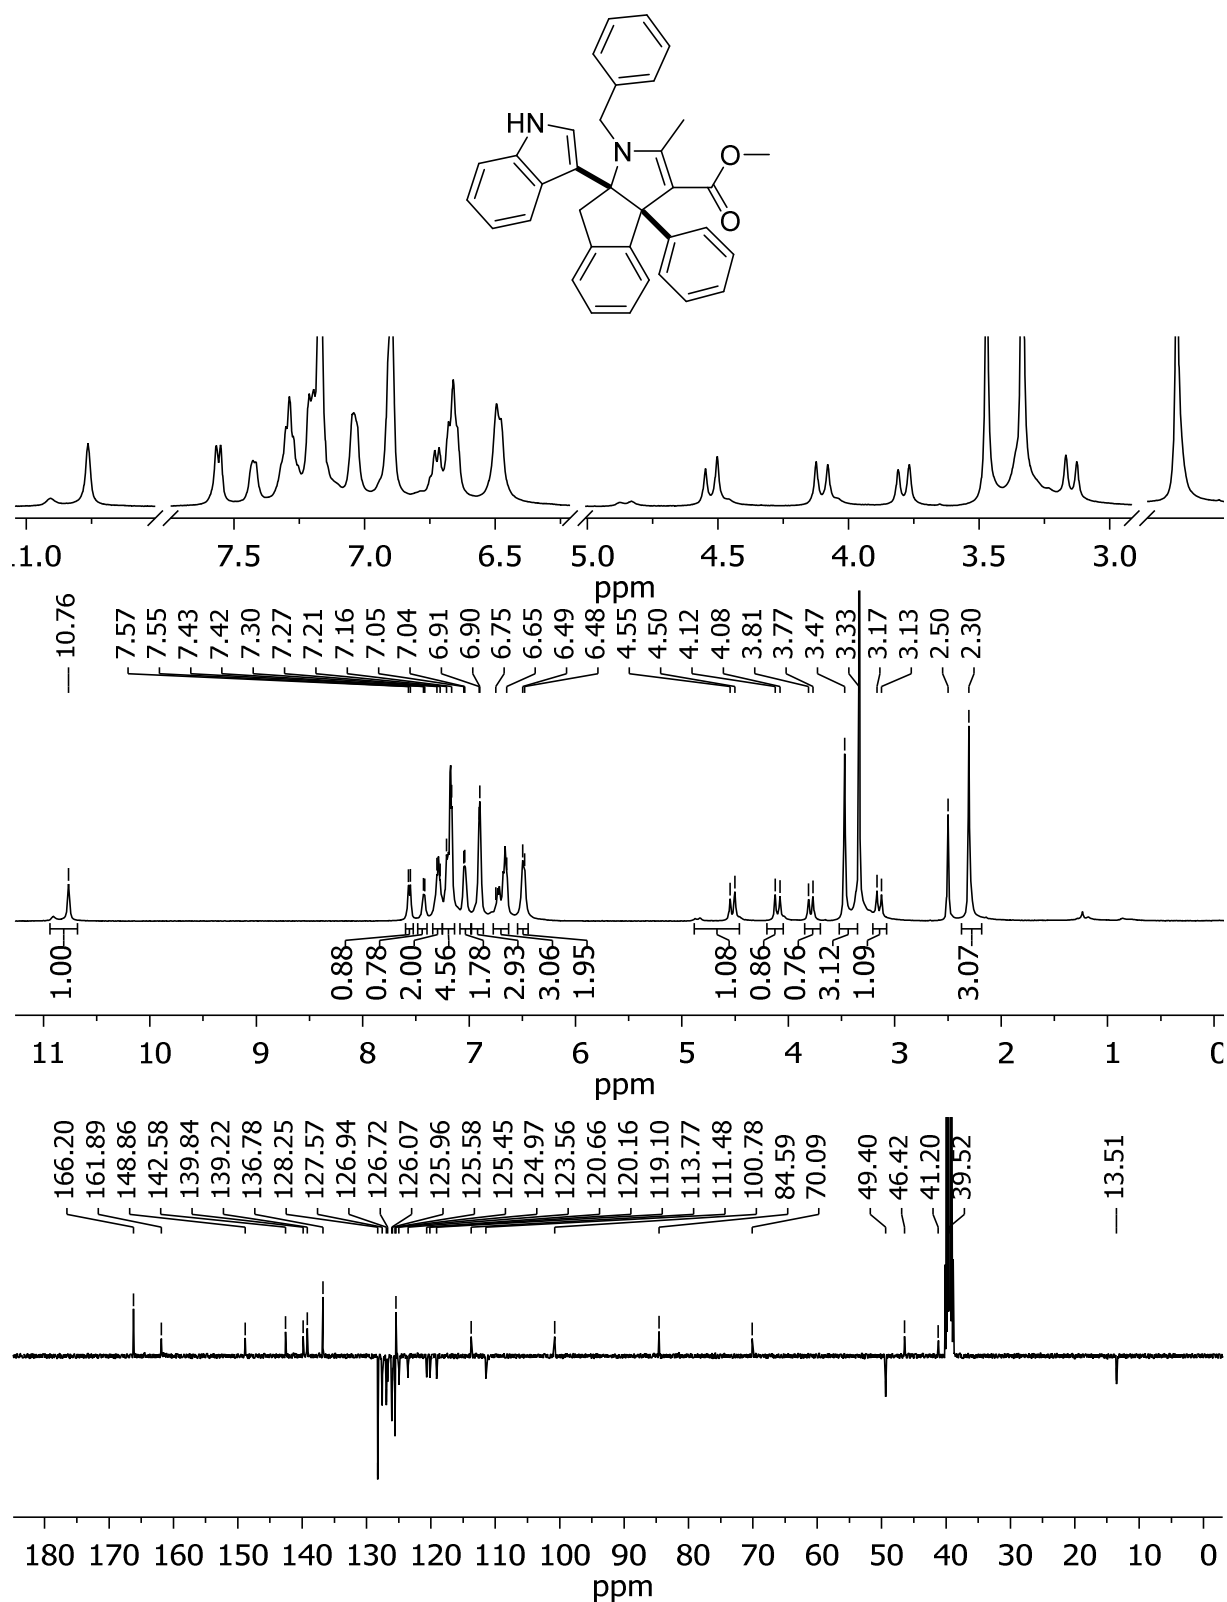

## High-Temperature- $^1\text{H}$ -NMR Experiments of **8**

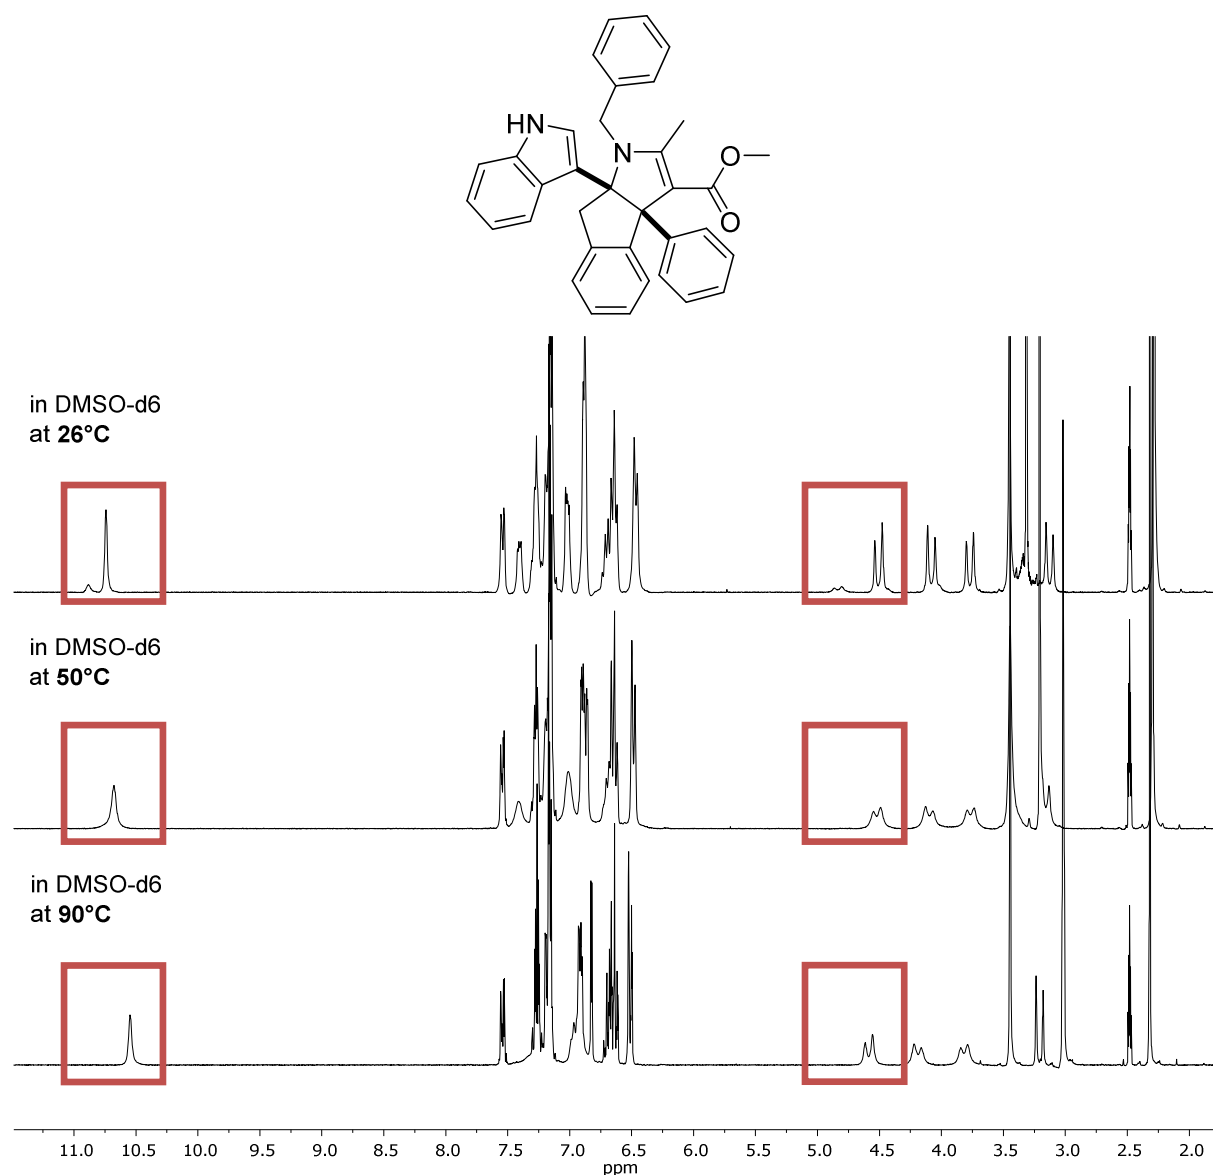

The  $^1\text{H}$ -NMR spectra of compound **8** were measured in  $\text{DMSO-d}_6$  (400 MHz) at 26 °C, 50 °C and 90 °C. Coalescence was observed at 90 °C to give rise to one final set of signals. Consequently, compound **8** consists of two rotamers in  $\text{DMSO-d}_6$  at room temperature.



**Hemiaminal 9** (CDCl<sub>3</sub>, <sup>1</sup>H-NMR: 400 MHz, APT: 75 MHz)

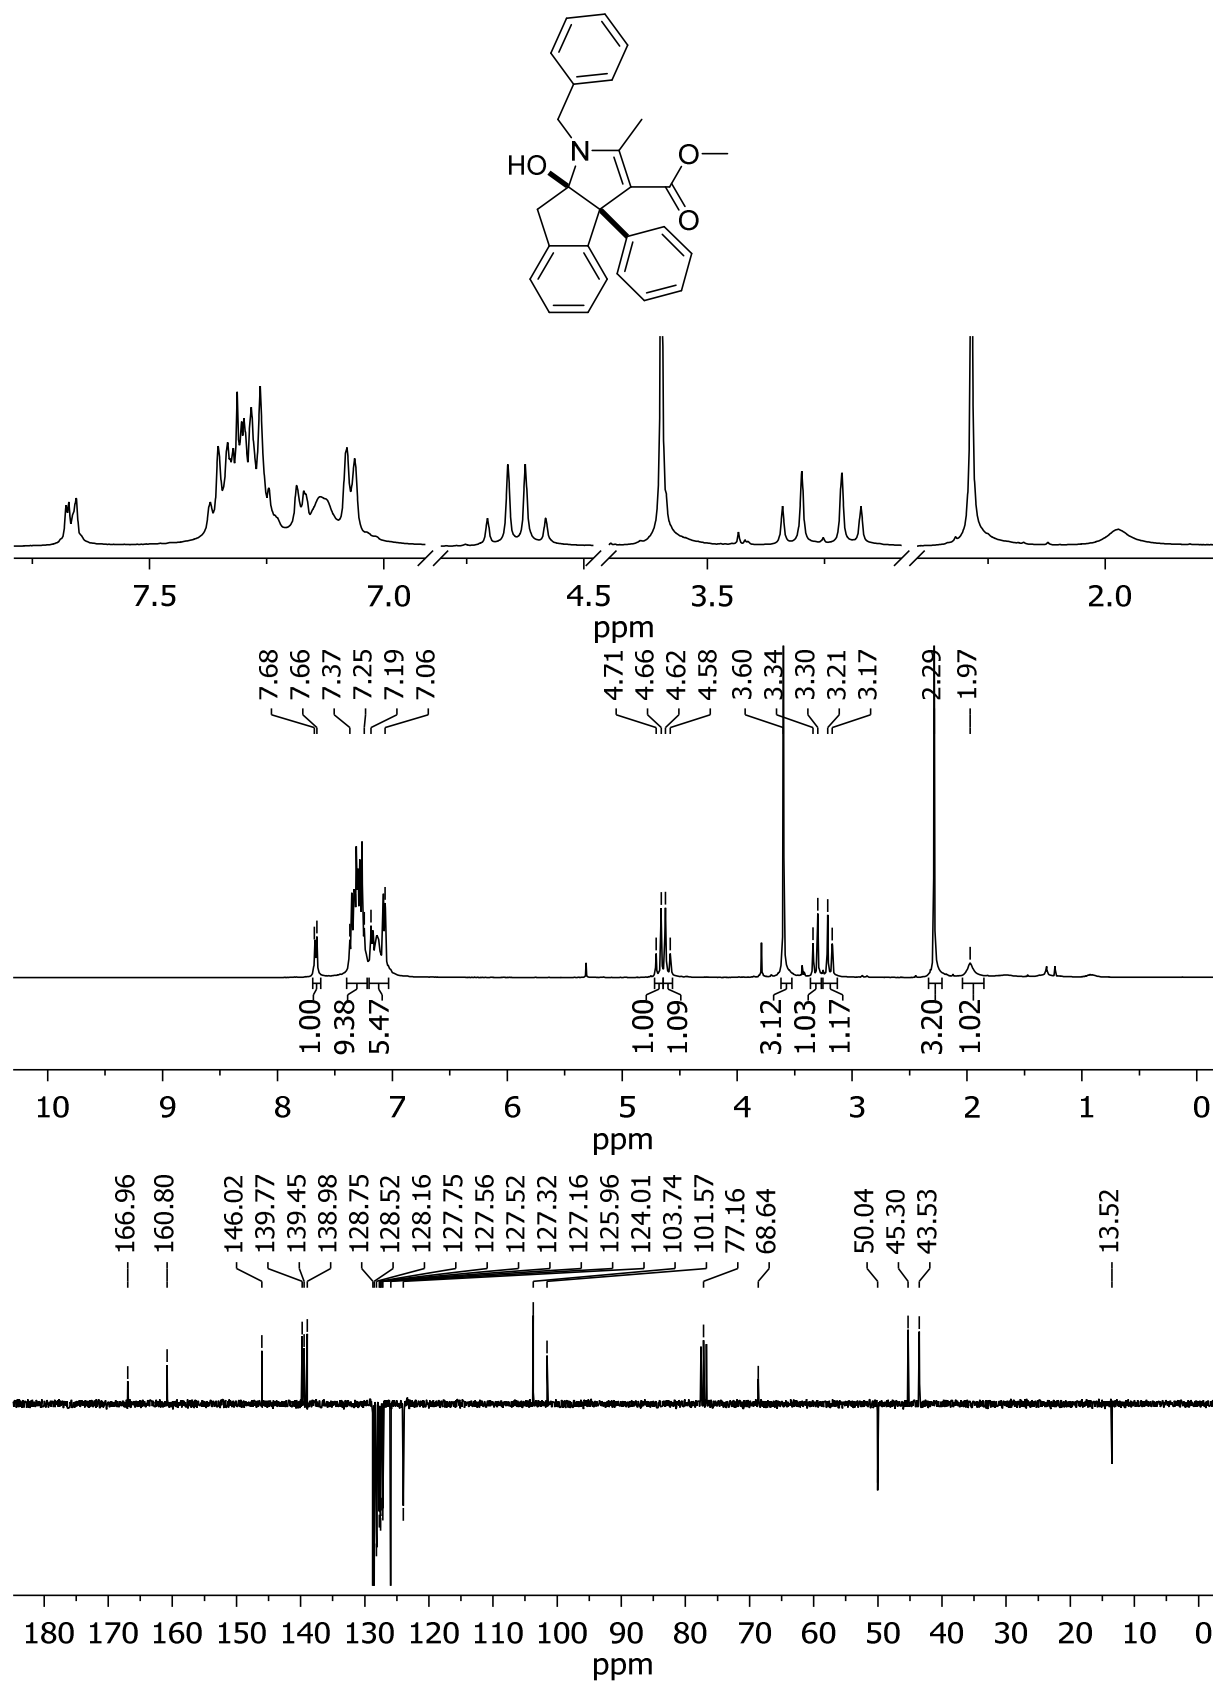

**8a-(Allyl)tetrahydroindeno[2,1-b]pyrrole 10** (CDCl<sub>3</sub>, <sup>1</sup>H-NMR: 300 MHz, APT: 75 MHz)

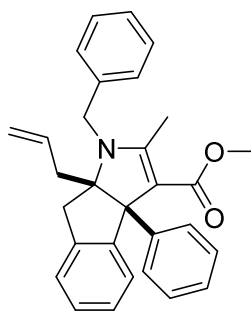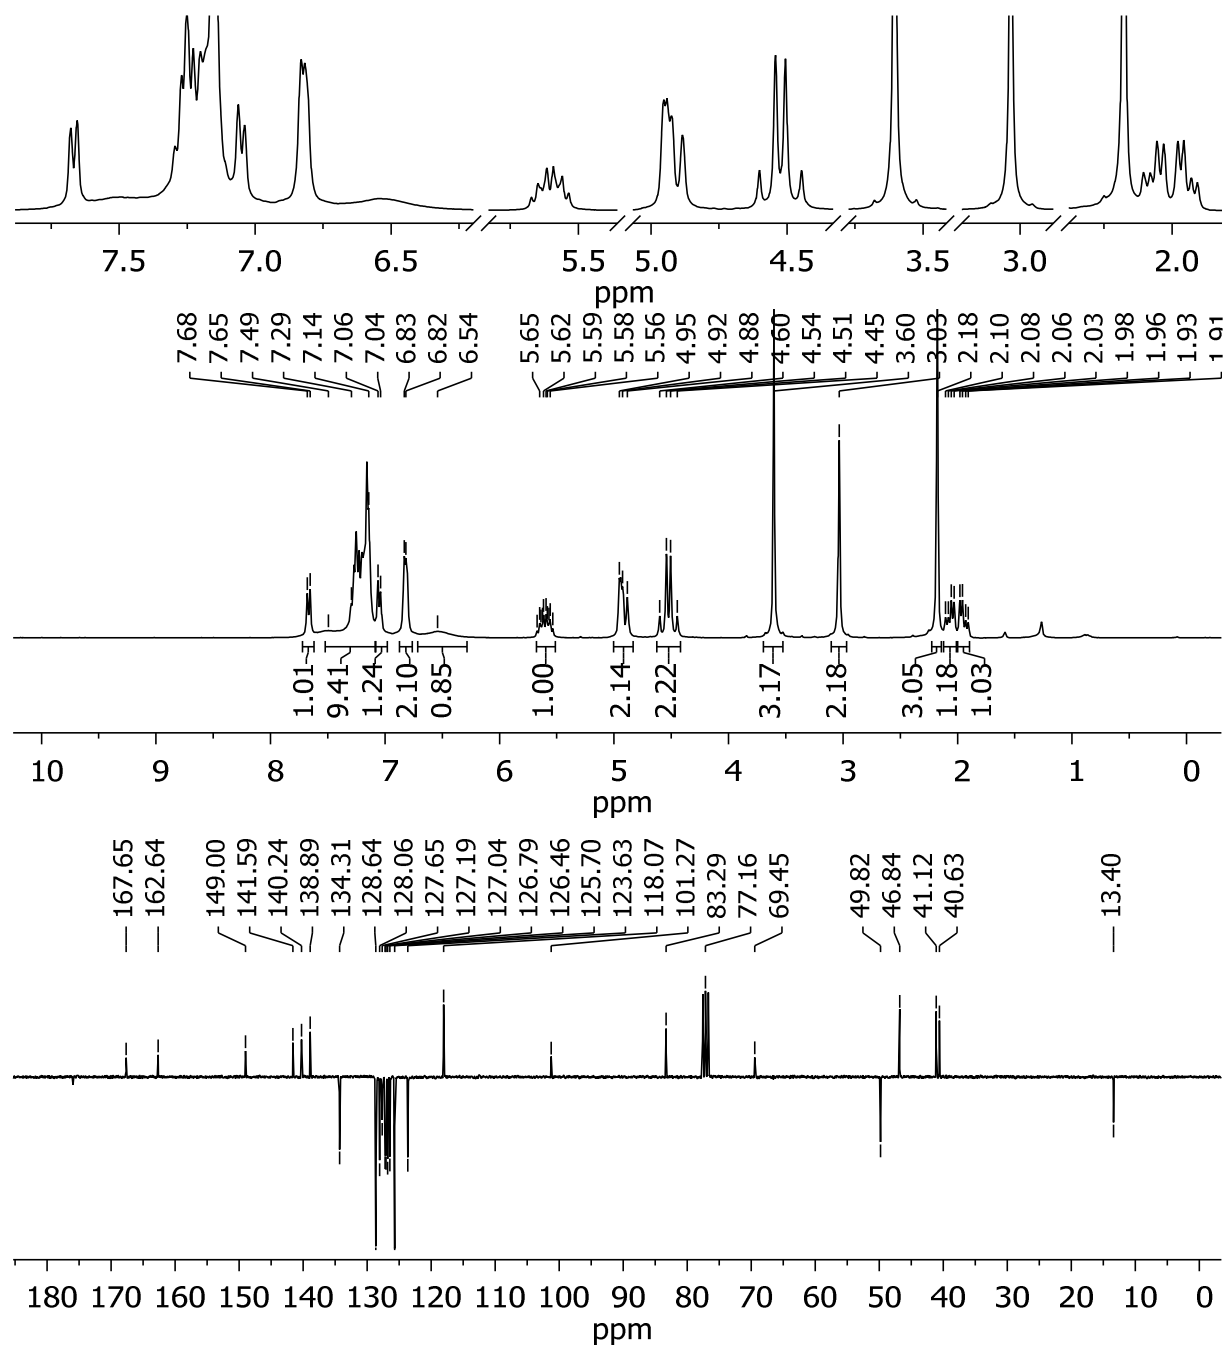

**8a-(2-Oxo-2-phenylethyl)tetrahydroindeno[2,1-b]pyrrole 11**

(CDCl<sub>3</sub>, <sup>1</sup>H-NMR: 300 MHz, APT: 100 MHz)

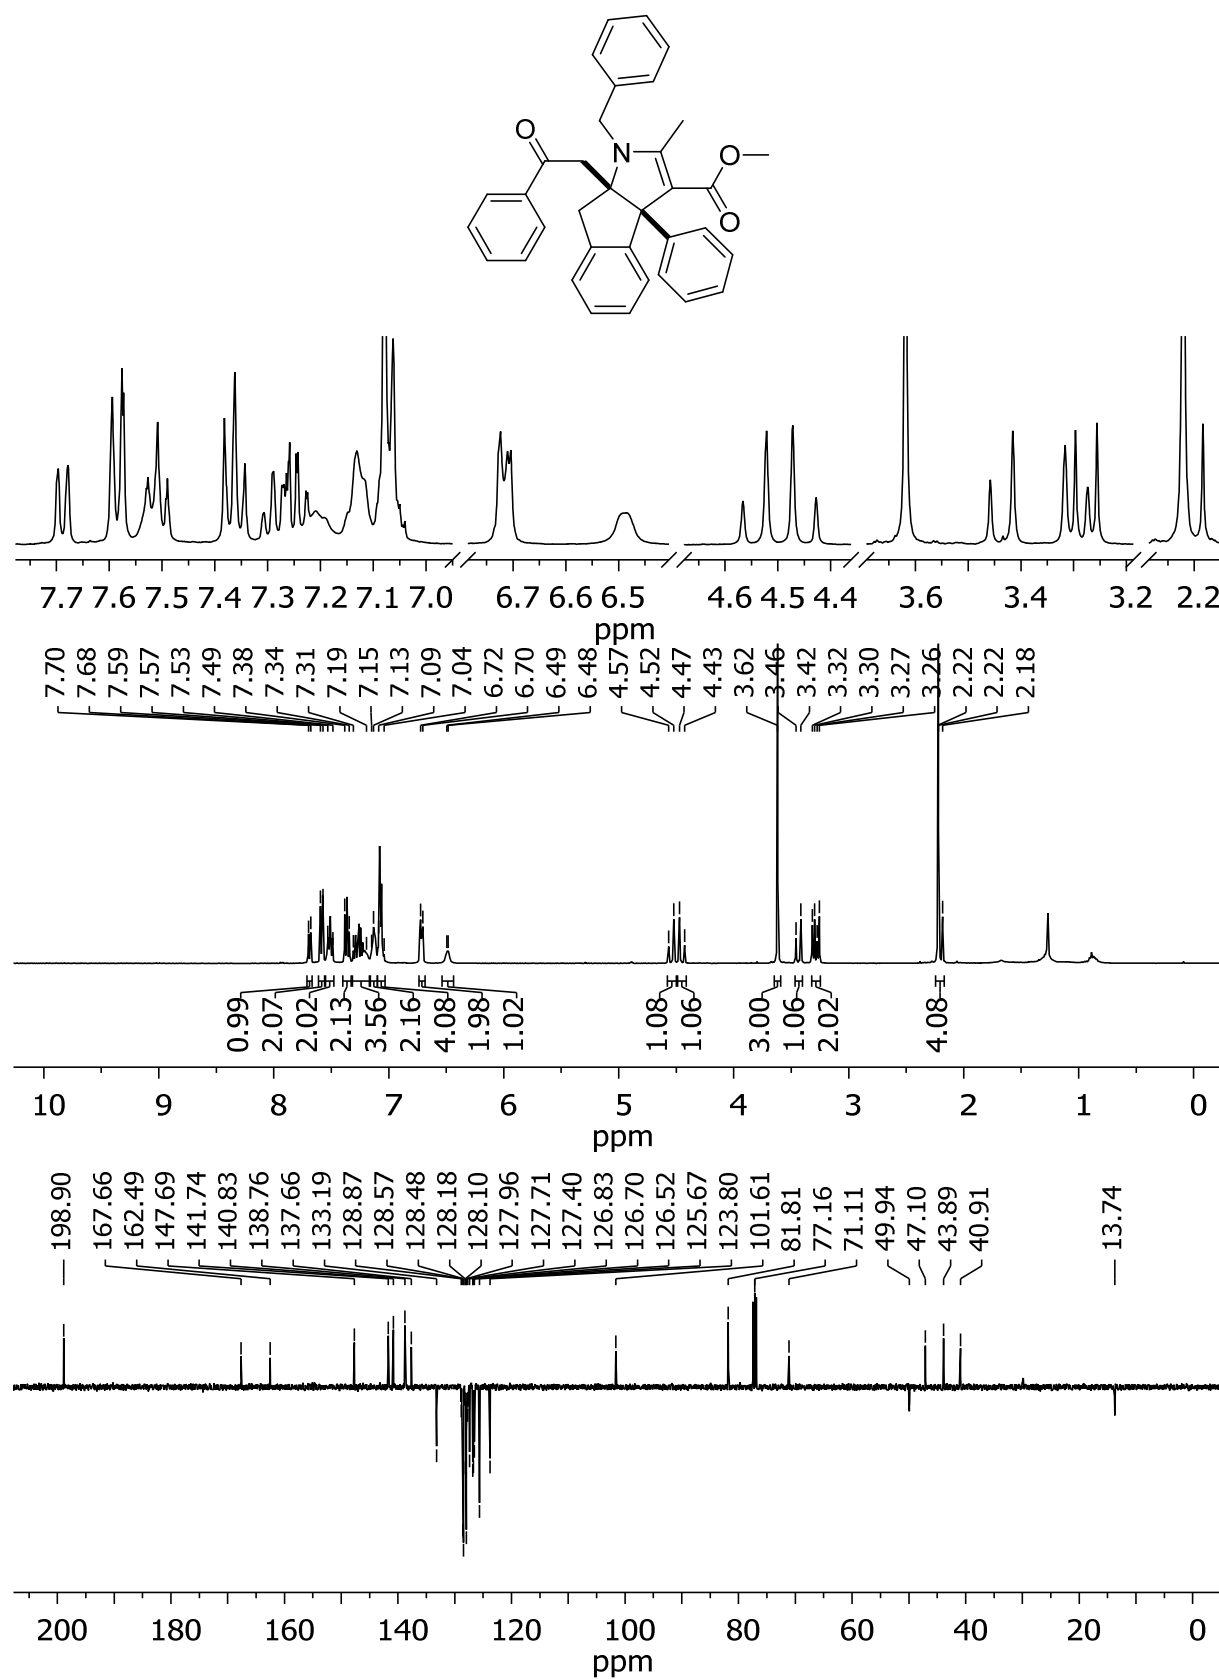

**Tetrahydroindeno[2,1-*b*]pyrrole 12** (CDCl<sub>3</sub>, <sup>1</sup>H-NMR: 400 MHz, APT: 100 MHz)

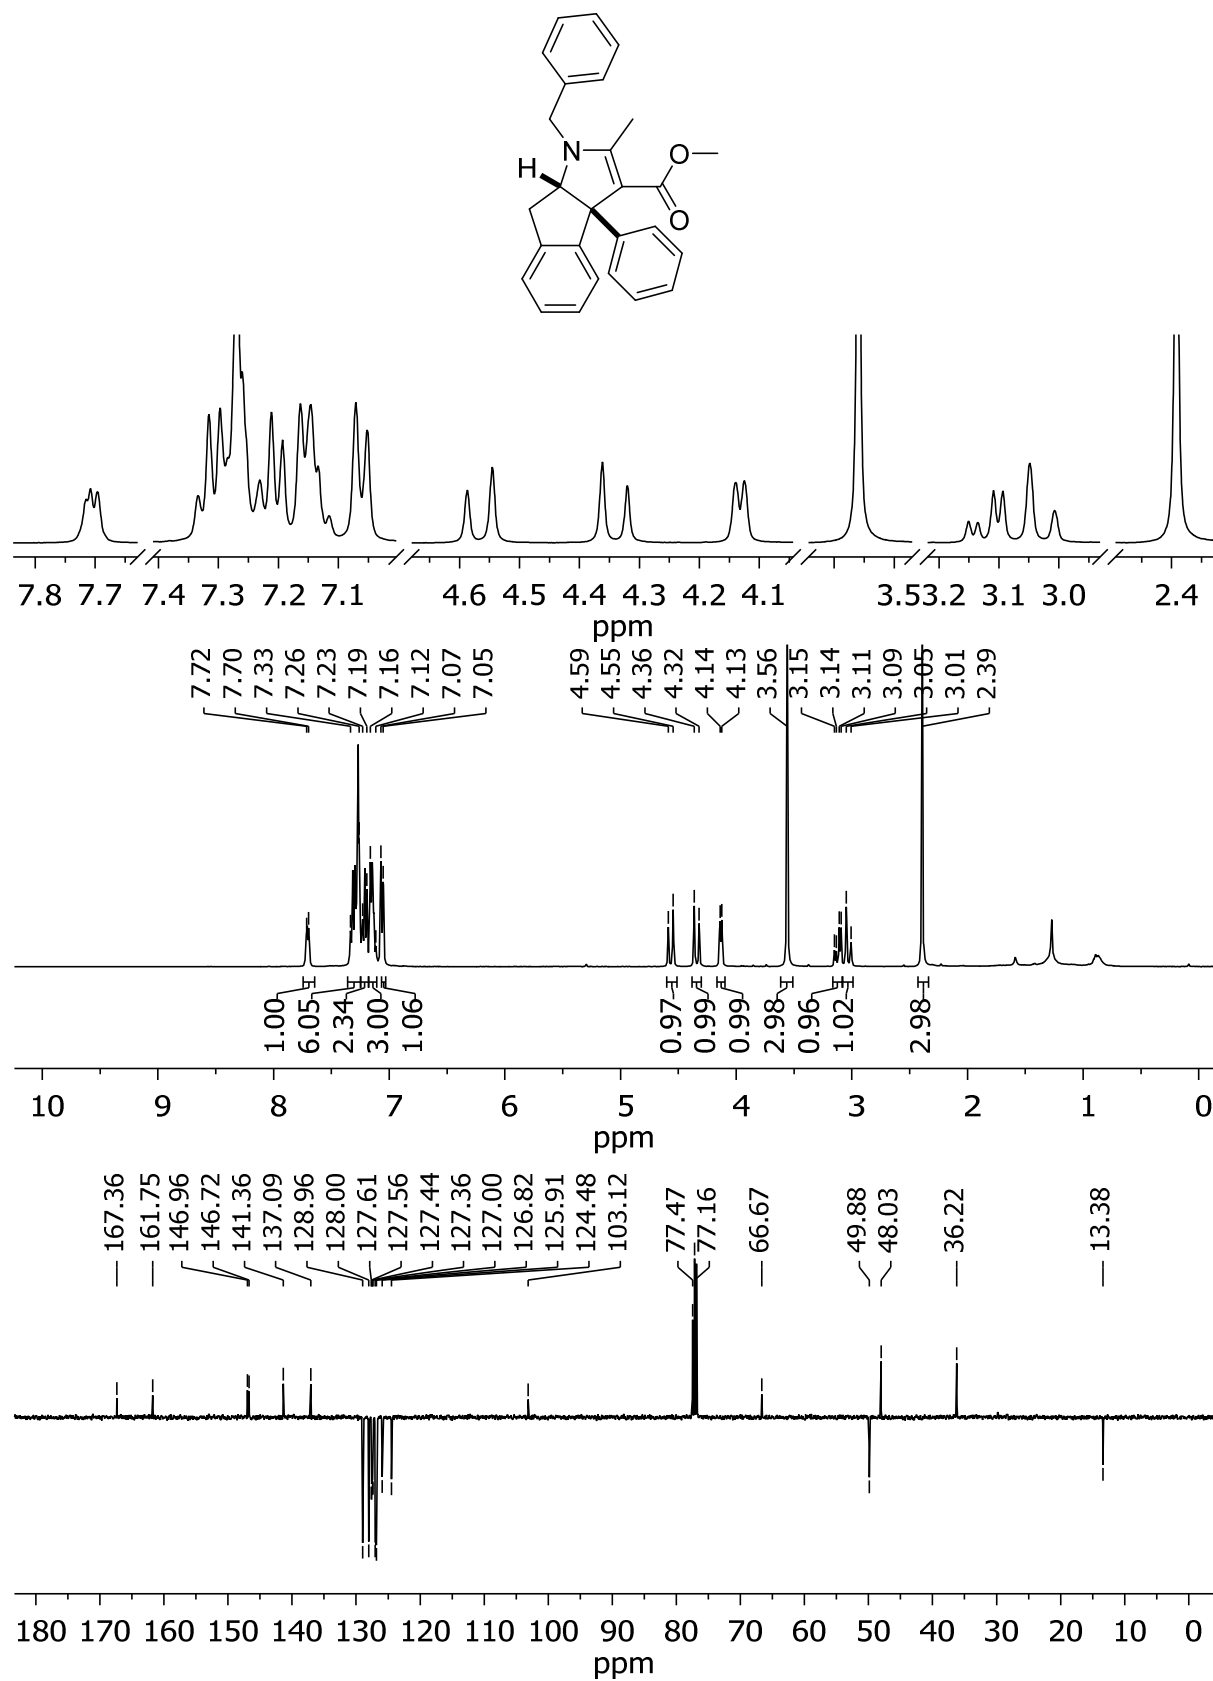

**8a-(Furanyl)tetrahydroindeno[2,1-*b*]pyrrole 13**

(CDCl<sub>3</sub>, <sup>1</sup>H-NMR: 300 MHz, APT: 100 MHz)

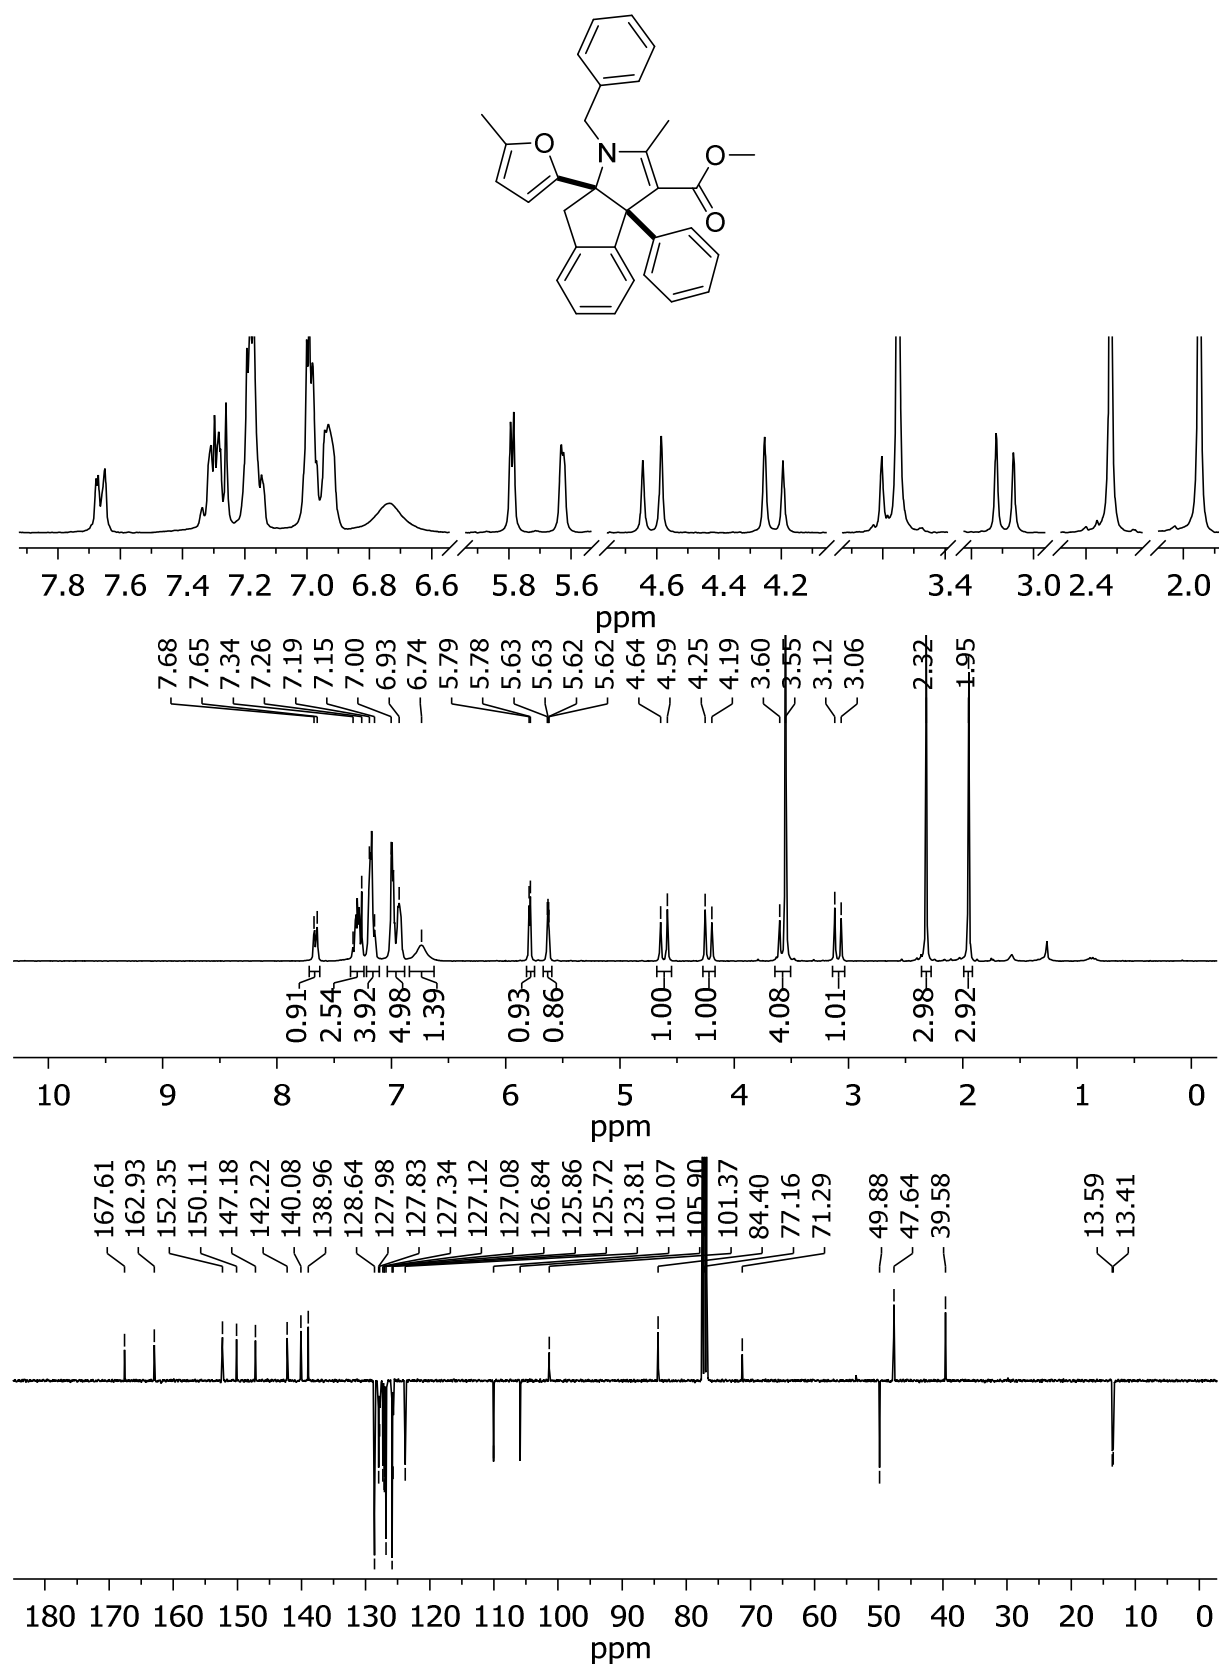

### 4.3 X-Ray Crystal Structure of **8**

#### Crystal Data and Structure Refinement for 8a-(Indolyl)tetrahydroindeno[2,1-*b*]pyrrole **8**

Note: The single-crystal of **8** was obtained from a solution in CH<sub>2</sub>Cl<sub>2</sub>. The unit cell contains one molecule of CH<sub>2</sub>Cl<sub>2</sub> per molecule of **8**.

|                                   |                                                                               |                 |
|-----------------------------------|-------------------------------------------------------------------------------|-----------------|
| Identification code               | P21n                                                                          |                 |
| Empirical formula                 | C <sub>36</sub> H <sub>32</sub> Cl <sub>2</sub> N <sub>2</sub> O <sub>2</sub> |                 |
| Formula weight                    | 595.53                                                                        |                 |
| Temperature                       | 130 K                                                                         |                 |
| Wavelength                        | 0.71073 Å                                                                     |                 |
| Crystal system                    | Monoclinic                                                                    |                 |
| Space group                       | P2 <sub>1</sub> /n                                                            |                 |
| Unit cell dimensions              | a = 9.9933(2) Å                                                               | α = 90°.        |
|                                   | b = 25.3761(5) Å                                                              | β = 96.046(2)°. |
|                                   | c = 11.9005(2) Å                                                              | γ = 90°.        |
| Volume                            | 3001.07(10) Å <sup>3</sup>                                                    |                 |
| Z                                 | 4                                                                             |                 |
| Density (calculated)              | 1.318 Mg/m <sup>3</sup>                                                       |                 |
| Absorption coefficient            | 0.252 mm <sup>-1</sup>                                                        |                 |
| F(000)                            | 1248                                                                          |                 |
| Crystal size                      | 0.5500 x 0.4000 x 0.0300 mm <sup>3</sup>                                      |                 |
| Theta range for data collection   | 2.201 to 26.372°.                                                             |                 |
| Index ranges                      | -12 ≤ h ≤ 12, -31 ≤ k ≤ 31, -14 ≤ l ≤ 14                                      |                 |
| Reflections collected             | 32405                                                                         |                 |
| Independent reflections           | 6144 [R(int) = 0.0281]                                                        |                 |
| Completeness to theta = 26.372°   | 100.0 %                                                                       |                 |
| Absorption correction             | Semi-empirical from equivalents                                               |                 |
| Max. and min. transmission        | 1.00000 and 0.96903                                                           |                 |
| Refinement method                 | Full-matrix least-squares on F <sup>2</sup>                                   |                 |
| Data / restraints / parameters    | 6144 / 0 / 381                                                                |                 |
| Goodness-of-fit on F <sup>2</sup> | 1.031                                                                         |                 |
| Final R indices [I > 2σ(I)]       | R1 = 0.0373, wR2 = 0.0856                                                     |                 |
| R indices (all data)              | R1 = 0.0461, wR2 = 0.0900                                                     |                 |
| Largest diff. peak and hole       | 0.285 and -0.425 e.Å <sup>3</sup>                                             |                 |

### Crystal Structure of 8a-(Indolyl)tetrahydroindeno[2,1-*b*]pyrrole **8**

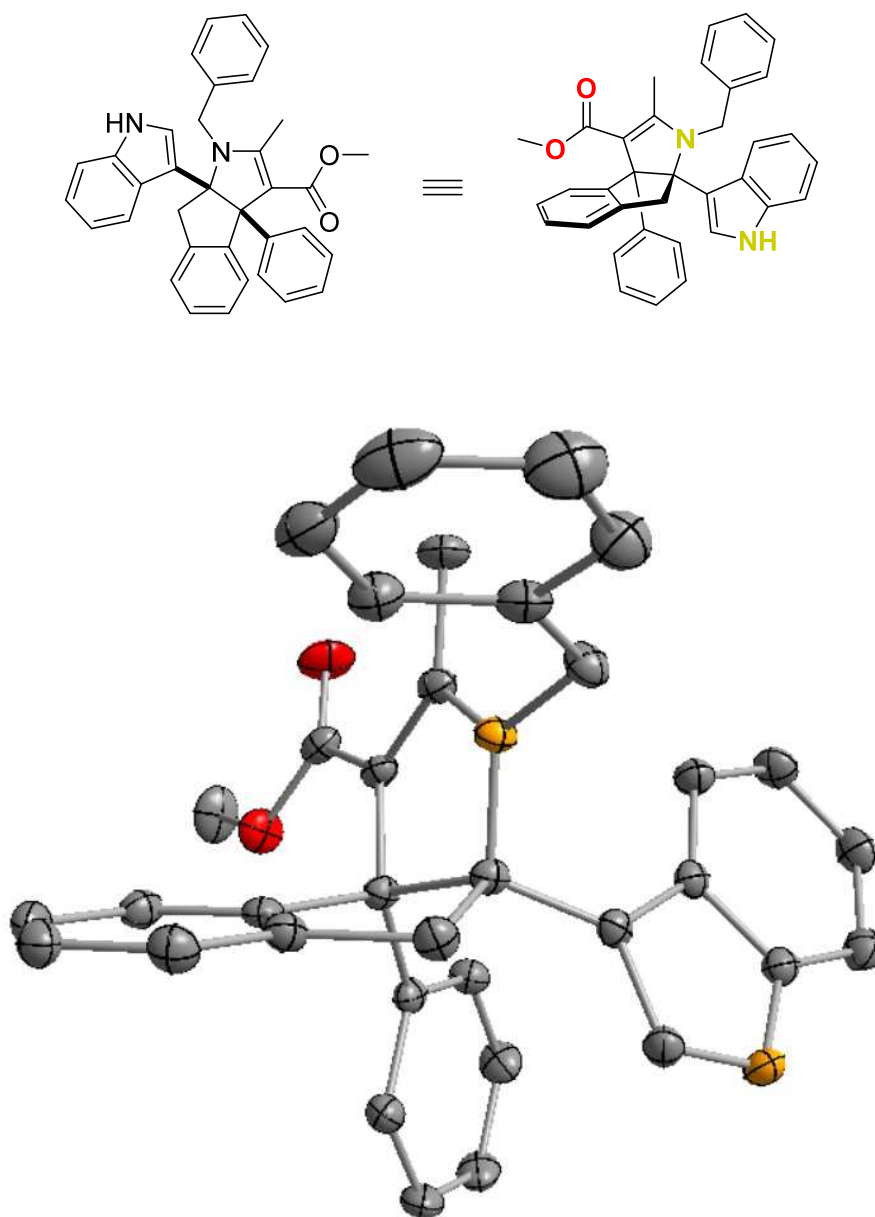

DIAMOND representation of 8a-(indolyl)tetrahydroindeno[2,1-*b*]pyrrole **8** with thermal ellipsoids shown at 50% probability level. Hydrogen atoms are omitted for clarity. CCDC 1817407 contains the supplementary crystallographic data of **8**. These data can be obtained free of charge from The Cambridge Crystallographic Data Centre via [www.ccdc.cam.ac.uk/data-request/cif](http://www.ccdc.cam.ac.uk/data-request/cif).

## 5 References

- (1) J. B. Bartlett, S. Freeman, P. Kenny, A. Morley, P. Whittamore, WO 2002020530A1, **2002**.
- (2) A. Nakao, H. Suzuki, R. Tatsumi, M. Seki, M. Tanaka, T. Setsuta, H. Iwasaki, WO 2009125853A1, **2009**.
- (3) A. Delgado, J. M. Garcia, D. Mauleon, C. Minguillon, J. R. Subirats, M. Feliz, F. Lopez, D. Velasco, *Can. J. Chem.* **1988**, 66, 517–527.
- (4) A. B. Pulipaka, S. C. Bergmeier, *J. Org. Chem.* **2008**, 73, 1462–1467.
- (5) H. Maekawa, Y. Yamamoto, H. Shimada, K. Yonemura, I. Nishiguchi, *Tetrahedron Lett.* **2004**, 45, 3869–3872.
- (6) X. Zhang, R. J. Staples, A. L. Rheingold, W. D. Wulff, *J. Am. Chem. Soc.* **2014**, 136, 13971–13974.
